# Supplementary material for: Province-Wide Tapping of a Shallow, Variably Depleted, and Metasomatized Mantle to Generate Earliest Flood Basalt Magmas of the Columbia River Basalt, Northwestern USA
Source: MDPI journal article supplement (doi:10.3390/min13121544), 2023-12-14
Supplement: s1 [file s1]

| Relative Abundances |        | 36Ar<br>[fA] | %1σ   | 37Ar<br>[fA] | %1σ    | 38Ar<br>[fA] | %1σ     | 39Ar<br>[fA] | %1σ    | 40Ar<br>[fA] | %1σ   | 40(r)/39(k) ± 2σ    | Age ± 2σ<br>(Ma) | 40Ar(r)<br>(%) | 39Ar(k)<br>(%) | K/Ca ± 2σ       |
|---------------------|--------|--------------|-------|--------------|--------|--------------|---------|--------------|--------|--------------|-------|---------------------|------------------|----------------|----------------|-----------------|
| 23F04441            | 0.7 %  | 0.059757     | 1.983 | 0.801        | 4.933  | 0.0116958    | 78.563  | 0.01978      | 43.344 | 17.6478      | 1.306 | 6.67289 ± 44.28331  | 20.47 ± 136.60   | 0.73           | 0.01           | 0.0103 ± 0.0093 |
| 23F04443            | 0.9 %  | 0.024171     | 4.743 | 0.327        | 12.582 | 0.0078046    | 114.472 | 0.01187      | 75.664 | 7.0555       | 3.268 | 11.52954 ± 72.98560 | 35.51 ± 227.00   | 1.91           | 0.01           | 0.0153 ± 0.0239 |
| 23F04445            | 1.2 %  | 0.074348     | 1.611 | 2.455        | 1.703  | 0.0127305    | 71.633  | 0.06285      | 13.786 | 22.5809      | 1.021 | 9.49105 ± 14.16815  | 28.73 ± 42.55    | 2.58           | 0.04           | 0.0107 ± 0.0031 |
| 23F04446            | 1.8 %  | 0.280293     | 0.508 | 34.127       | 0.266  | 0.0669646    | 13.651  | 0.64033      | 1.381  | 83.7023      | 0.276 | 4.48212 ± 1.59479   | 13.62 ± 4.83     | 3.31           | 0.36           | 0.0078 ± 0.0002 |
| 23F04447            | 2.3 %  | 0.196234     | 0.684 | 69.147       | 0.242  | 0.0612710    | 15.402  | 1.18846      | 0.792  | 58.3270      | 0.396 | 4.64924 ± 0.81805   | 14.13 ± 2.48     | 9.12           | 0.66           | 0.0071 ± 0.0001 |
| 23F04449            | 2.8 %  | 0.166686     | 0.790 | 114.359      | 0.237  | 0.0562224    | 15.960  | 1.91464      | 0.478  | 51.1265      | 0.452 | 5.75105 ± 0.50183   | 17.46 ± 1.52     | 20.71          | 1.07           | 0.0069 ± 0.0001 |
| 23F04450            | 3.4 %  | 0.201420     | 0.682 | 255.249      | 0.234  | 0.0897810    | 10.217  | 4.18840      | 0.238  | 62.1295      | 0.371 | 5.61322 ± 0.23835   | 17.04 ± 0.72     | 36.36          | 2.34           | 0.0068 ± 0.0000 |
| 23F04452            | 4.0 %  | 0.313239     | 0.492 | 603.333      | 0.233  | 0.1646365    | 5.548   | 9.80741      | 0.113  | 98.3552      | 0.235 | 5.68147 ± 0.11460   | 17.25 ± 0.35     | 54.41          | 5.47           | 0.0067 ± 0.0000 |
| 23F04453            | 4.7 %  | 0.340291     | 0.443 | 694.797      | 0.233  | 0.1847830    | 5.025   | 11.33065     | 0.099  | 107.9788     | 0.214 | 5.73725 ± 0.09885   | 17.42 ± 0.30     | 57.83          | 6.32           | 0.0067 ± 0.0000 |
| 23F04454            | 5.3 %  | 0.389132     | 0.420 | 672.654      | 0.233  | 0.1928545    | 4.558   | 11.06184     | 0.106  | 120.6172     | 0.192 | 5.52373 ± 0.10724   | 16.77 ± 0.32     | 48.68          | 6.17           | 0.0068 ± 0.0000 |
| 23F04456            | 6.0 %  | 0.443959     | 0.384 | 814.260      | 0.233  | 0.2295357    | 3.777   | 13.42469     | 0.090  | 140.1792     | 0.165 | 5.68417 ± 0.09287   | 17.26 ± 0.28     | 52.31          | 7.49           | 0.0068 ± 0.0000 |
| 23F04457            | 6.8 %  | 0.497286     | 0.358 | 807.290      | 0.233  | 0.2475742    | 3.783   | 13.40473     | 0.087  | 155.4053     | 0.149 | 5.59338 ± 0.09618   | 16.98 ± 0.29     | 46.38          | 7.48           | 0.0069 ± 0.0000 |
| 23F04458            | 7.5 %  | 0.483695     | 0.356 | 731.819      | 0.233  | 0.2248474    | 4.205   | 12.22784     | 0.096  | 150.8890     | 0.153 | 5.57323 ± 0.10199   | 16.92 ± 0.31     | 43.43          | 6.83           | 0.0069 ± 0.0000 |
| 23F04460            | 8.3 %  | 0.547311     | 0.343 | 784.812      | 0.233  | 0.2408797    | 3.868   | 13.18705     | 0.087  | 171.6115     | 0.135 | 5.64021 ± 0.10178   | 17.12 ± 0.31     | 41.68          | 7.36           | 0.0069 ± 0.0000 |
| 23F04461            | 9.1 %  | 0.568766     | 0.351 | 624.798      | 0.234  | 0.2197584    | 4.276   | 10.56205     | 0.108  | 174.4513     | 0.133 | 5.41857 ± 0.13191   | 16.46 ± 0.40     | 31.56          | 5.90           | 0.0070 ± 0.0000 |
| 23F04462            | 9.8 %  | 0.521197     | 0.358 | 469.672      | 0.234  | 0.1874190    | 4.866   | 8.01805      | 0.133  | 158.9643     | 0.145 | 5.34633 ± 0.16277   | 16.24 ± 0.49     | 25.95          | 4.48           | 0.0071 ± 0.0000 |
| 23F04464            | 10.5 % | 0.357540     | 0.440 | 325.032      | 0.234  | 0.1272761    | 7.284   | 5.52973      | 0.172  | 109.5942     | 0.211 | 5.46417 ± 0.20214   | 16.59 ± 0.61     | 26.53          | 3.09           | 0.0070 ± 0.0000 |
| 23F04465            | 11.0 % | 0.430159     | 0.387 | 205.806      | 0.235  | 0.1319734    | 6.791   | 3.51332      | 0.264  | 127.7474     | 0.181 | 4.71023 ± 0.33367   | 14.31 ± 1.01     | 12.47          | 1.96           | 0.0071 ± 0.0001 |
| 23F04466            | 11.5 % | 0.340147     | 0.464 | 129.508      | 0.236  | 0.0903318    | 10.459  | 2.20394      | 0.423  | 100.5652     | 0.229 | 4.46127 ± 0.50529   | 13.56 ± 1.53     | 9.41           | 1.23           | 0.0070 ± 0.0001 |
| 23F04468            | 12.0 % | 0.313951     | 0.469 | 123.869      | 0.237  | 0.0739892    | 12.671  | 2.12852      | 0.424  | 94.1237      | 0.245 | 5.06881 ± 0.49505   | 15.40 ± 1.50     | 11.03          | 1.19           | 0.0071 ± 0.0001 |
| 23F04469            | 12.5 % | 0.337788     | 0.446 | 99.405       | 0.238  | 0.0889085    | 10.324  | 1.68523      | 0.500  | 98.5637      | 0.234 | 3.53703 ± 0.63717   | 10.76 ± 1.93     | 5.82           | 0.94           | 0.0070 ± 0.0001 |
| 23F04470            | 13.0 % | 0.288099     | 0.514 | 83.184       | 0.240  | 0.0668417    | 13.703  | 1.39852      | 0.674  | 84.5269      | 0.273 | 3.88394 ± 0.75438   | 11.81 ± 2.29     | 6.18           | 0.78           | 0.0070 ± 0.0001 |
| 23F04472            | 13.5 % | 0.319522     | 0.466 | 98.005       | 0.239  | 0.0791664    | 11.605  | 1.65701      | 0.556  | 93.3213      | 0.247 | 3.65919 ± 0.64080   | 11.13 ± 1.94     | 6.25           | 0.93           | 0.0070 ± 0.0001 |
| 23F04473            | 14.5 % | 0.342310     | 0.444 | 117.103      | 0.237  | 0.0882049    | 10.319  | 2.05058      | 0.453  | 101.1779     | 0.228 | 4.26611 ± 0.52670   | 12.97 ± 1.60     | 8.33           | 1.15           | 0.0073 ± 0.0001 |
| 23F04474            | 15.0 % | 0.477226     | 0.378 | 274.638      | 0.234  | 0.1384331    | 6.519   | 4.73026      | 0.202  | 144.8431     | 0.159 | 5.38520 ± 0.26551   | 16.35 ± 0.80     | 16.93          | 2.64           | 0.0071 ± 0.0000 |
| 23F04476            | 15.6 % | 1.108916     | 0.250 | 934.957      | 0.234  | 0.3658494    | 2.692   | 15.85636     | 0.079  | 342.6134     | 0.068 | 5.70135 ± 0.12176   | 17.31 ± 0.37     | 25.39          | 8.86           | 0.0070 ± 0.0000 |
| 23F04477            | 16.2 % | 0.773804     | 0.287 | 328.298      | 0.234  | 0.1814091    | 5.321   | 5.31533      | 0.180  | 229.7207     | 0.101 | 4.93390 ± 0.28946   | 14.99 ± 0.88     | 10.96          | 2.96           | 0.0067 ± 0.0000 |
| 23F04478            | 17.0 % | 0.630828     | 0.317 | 266.948      | 0.234  | 0.1561960    | 6.001   | 4.23794      | 0.222  | 189.0750     | 0.122 | 5.47788 ± 0.32835   | 16.63 ± 0.99     | 11.78          | 2.36           | 0.0066 ± 0.0000 |
| 23F04480            | 17.9 % | 0.630370     | 0.321 | 317.175      | 0.234  | 0.1653685    | 5.544   | 5.06579      | 0.191  | 192.8122     | 0.120 | 6.21185 ± 0.27799   | 18.85 ± 0.84     | 15.66          | 2.82           | 0.0066 ± 0.0000 |
| 23F04481            | 19.0 % | 0.233302     | 0.601 | 259.181      | 0.235  | 0.0779749    | 12.343  | 4.06825      | 0.230  | 73.3362      | 0.315 | 6.30366 ± 0.25010   | 19.13 ± 0.75     | 33.54          | 2.26           | 0.0065 ± 0.0000 |
| 23F04482            | 21.2 % | 0.728304     | 0.308 | 319.539      | 0.234  | 0.1736222    | 5.222   | 5.00840      | 0.198  | 221.8773     | 0.104 | 6.29158 ± 0.30893   | 19.09 ± 0.93     | 13.62          | 2.79           | 0.0065 ± 0.0000 |
| 23F04484            | 23.5 % | 0.186087     | 0.735 | 236.953      | 0.235  | 0.0714010    | 13.589  | 3.70865      | 0.242  | 58.0339      | 0.398 | 6.07237 ± 0.26821   | 18.43 ± 0.81     | 37.21          | 2.06           | 0.0065 ± 0.0000 |

Σ 12.606139 0.076 10799.501 0.054 4.2757047 1.223 179.20845 0.032 3842.9534 0.034

| Information on Analysis and Constants Used in Calculations |  |
|------------------------------------------------------------|--|
| Project = <b>MASS (22-34)</b>                              |  |
| Sample = <b>MM-CRB-32</b>                                  |  |
| Material = <b>Plagioclase</b>                              |  |
| Location = <b>Hells Canyon</b>                             |  |
| Region = <b>Snake Rvr. Valley</b>                          |  |
| Analyst = <b>Dan Miggins</b>                               |  |
| Irradiation = <b>22-OSU-05 (5D10-22)</b>                   |  |
| Position = <b>X: 999   Y: 999   Z/H: 17.38687 mm</b>       |  |
| FCT-NM Age = <b>28.201 ± 0.023 Ma</b>                      |  |
| FCT-NM Reference = <b>Kuiper et al. 2008</b>               |  |
| FCT-NM 40Ar/39Ar Ratio = <b>9.31638 ± 0.01174</b>          |  |
| FCT-NM J-value = <b>0.00166647 ± 0.00000210</b>            |  |
| Air Shot 40Ar/36Ar = <b>303.3400 ± 0.4732</b>              |  |
| Air Shot MDF = <b>0.99605543 ± 0.00046193 (LIN)</b>        |  |
| Experiment Type = <b>Incremental Heating</b>               |  |
| Extraction Method = <b>Bulk Laser Heating</b>              |  |
| Heating = <b>50 sec</b>                                    |  |
| Isolation = <b>6.00 min</b>                                |  |
| Instrument = <b>ARGUS-VI-F</b>                             |  |
| Preferred Age = <b>Plateau Age</b>                         |  |
| Age Classification = <b>Crystallization Age</b>            |  |
| IGSN = <b>13</b>                                           |  |
| Rock Class = <b>Igneous&gt;Volcanic&gt;Mafic</b>           |  |
| Lithology = <b>Basaltic Lava</b>                           |  |
| Lat-Lon = <b>117°06.7'N - 44°40.2'E</b>                    |  |

Age Equations = **Min et al. (2000)**  
Negative Intensities = **Allowed**  
Collector Calibrations = **36Ar**  
Decay 40K(total) = **5.463 ± 0.107 E-10 1/a**  
Decay 40K(EC,β<sup>+</sup>) = **0.580 ± 0.014 E-10 1/a**  
Decay 40K(β<sup>-</sup>) = **4.884 ± 0.099 E-10 1/a**  
Decay 39Ar = **2.940 ± 0.016 E-07 1/h**  
Decay 37Ar = **8.230 ± 0.012 E-04 1/h**  
Decay 36Cl = **2.257 ± 0.015 E-06 1/a**  
Production 39/37(ca) = **0.0006425 ± 0.0000059**  
Production 38/37(ca) = **0.0001800 ± 0.0000173**  
Production 36/37(ca) = **0.0002703 ± 0.0000005**  
Production 40/39(k) = **0.000607 ± 0.000059**  
Production 38/39(k) = **0.012077 ± 0.000011**  
Production 36/38(cl) = **262.80 ± 1.71**  
Scaling Ratio K/Ca = **0.430**  
Abundance Ratio 40K/K = **1.1700 ± 0.0100 E-04**  
Atomic Weight K = **39.0983 ± 0.0001 g**  
Trapped 40/36(a) = **298.56 ± 0.31**  
Trapped 38/36(a) = **0.1885 ± 0.0003**  
Standard MDF 40/36(a) = **298.56 ± 0.31**  
Standard MDF Reference = **Lee et al 2006**

| Results          | 40(a)/36(a) ± 2σ         | 40(r)/39(k) ± 2σ                                      | Age ± 2σ<br>(Ma)        | MSWD               | 39Ar(k)<br>(%,n)                           | K/Ca ± 2σ       |
|------------------|--------------------------|-------------------------------------------------------|-------------------------|--------------------|--------------------------------------------|-----------------|
| Age Plateau      |                          | 5.63524 ± 0.04775<br>± 0.85%                          | 17.11 ± 0.15<br>± 0.88% | 1.60<br>12%        | 50.52<br>9                                 | 0.0068 ± 0.0001 |
|                  |                          | Full External Error ± 0.90<br>Analytical Error ± 0.14 |                         | 2.00<br>1.2668     | 2σ Confidence Limit<br>Error Magnification |                 |
| Total Fusion Age |                          | 5.51860 ± 0.03783<br>± 0.69%                          | 16.76 ± 0.12<br>± 0.73% |                    | 32                                         | 0.0069 ± 0.0000 |
|                  |                          | Full External Error ± 0.88<br>Analytical Error ± 0.11 |                         |                    |                                            |                 |
| Normal Isochron  | 295.14 ± 7.99<br>± 2.71% | 5.70362 ± 0.17143<br>± 3.01%                          | 17.32 ± 0.52<br>± 3.00% | 1.68<br>11%        | 50.52<br>9                                 |                 |
|                  |                          | Full External Error ± 1.04<br>Analytical Error ± 0.52 |                         | 2.07<br>1.2978     | 2σ Confidence Limit<br>Error Magnification |                 |
|                  |                          |                                                       |                         | 10<br>0.0000538005 | Number of Iterations<br>Convergence        |                 |
| Inverse Isochron | 295.11 ± 7.90<br>± 2.68% | 5.70613 ± 0.16905<br>± 2.96%                          | 17.32 ± 0.51<br>± 2.96% | 1.68<br>11%        | 50.52<br>9                                 |                 |
|                  |                          | Full External Error ± 1.03<br>Analytical Error ± 0.51 |                         | 2.07<br>1.2952     | 2σ Confidence Limit<br>Error Magnification |                 |
|                  |                          |                                                       |                         | 4<br>0.0000915030  | Number of Iterations<br>Convergence        |                 |
|                  |                          |                                                       |                         | 37%                | Spreading Factor                           |                 |

| Inverse Isochron |        | 39(k)/40(a+r) ± 2σ    | 36(a)/40(a+r) ± 2σ      |
|------------------|--------|-----------------------|-------------------------|
| 23F04441         | 0.7 %  | 0.0010915 ± 0.0009719 | 0.00337380 ± 0.00016062 |
| 23F04443         | 0.9 %  | 0.0016529 ± 0.0025488 | 0.00341324 ± 0.00039421 |
| 23F04445         | 1.2 %  | 0.0027136 ± 0.0007695 | 0.00326315 ± 0.00012531 |
| 23F04446         | 1.8 %  | 0.0073882 ± 0.0002152 | 0.00323850 ± 0.00003847 |
| 23F04447         | 2.3 %  | 0.0196143 ± 0.0003586 | 0.00304397 ± 0.00005197 |
| 23F04449         | 2.8 %  | 0.0360127 ± 0.0004845 | 0.00265571 ± 0.00005697 |
| 23F04450         | 3.4 %  | 0.0647770 ± 0.0005807 | 0.00213154 ± 0.00004742 |
| 23F04452         | 4.0 %  | 0.0957785 ± 0.0005083 | 0.00152679 ± 0.00003355 |
| 23F04453         | 4.7 %  | 0.1008059 ± 0.0004855 | 0.00141228 ± 0.00003030 |
| 23F04454         | 5.3 %  | 0.0881319 ± 0.0003959 | 0.00171886 ± 0.00002921 |
| 23F04456         | 6.0 %  | 0.0920411 ± 0.0003565 | 0.00159708 ± 0.00002649 |
| 23F04457         | 6.8 %  | 0.0829231 ± 0.0002952 | 0.00179588 ± 0.00002490 |
| 23F04458         | 7.5 %  | 0.0779262 ± 0.0002912 | 0.00189476 ± 0.00002473 |
| 23F04460         | 8.3 %  | 0.0739075 ± 0.0002463 | 0.00195320 ± 0.00002360 |
| 23F04461         | 9.1 %  | 0.0582453 ± 0.0002073 | 0.00229232 ± 0.00002431 |
| 23F04462         | 9.8 %  | 0.0485424 ± 0.0001978 | 0.00248016 ± 0.00002500 |
| 23F04464         | 10.5 % | 0.0485523 ± 0.0002711 | 0.00246082 ± 0.00003085 |
| 23F04465         | 11.0 % | 0.0264674 ± 0.0001750 | 0.00293185 ± 0.00002825 |
| 23F04466         | 11.5 % | 0.0210884 ± 0.0002098 | 0.00303429 ± 0.00003441 |
| 23F04468         | 12.0 % | 0.0217688 ± 0.0002200 | 0.00297983 ± 0.00003461 |
| 23F04469         | 12.5 % | 0.0164500 ± 0.0001878 | 0.00315453 ± 0.00003402 |
| 23F04470         | 13.0 % | 0.0159131 ± 0.0002395 | 0.00314240 ± 0.00003906 |
| 23F04472         | 13.5 % | 0.0170814 ± 0.0002153 | 0.00314006 ± 0.00003553 |
| 23F04473         | 14.5 % | 0.0195237 ± 0.0002048 | 0.00307044 ± 0.00003318 |
| 23F04474         | 15.0 % | 0.0314402 ± 0.0001674 | 0.00278232 ± 0.00002659 |
| 23F04476         | 15.6 % | 0.0445285 ± 0.0001008 | 0.00249909 ± 0.00001707 |
| 23F04477         | 16.2 % | 0.0222203 ± 0.0000963 | 0.00298220 ± 0.00002035 |
| 23F04478         | 17.0 % | 0.0215072 ± 0.0001140 | 0.00295480 ± 0.00002244 |
| 23F04480         | 17.9 % | 0.0252167 ± 0.0001187 | 0.00282475 ± 0.00002222 |
| 23F04481         | 19.0 % | 0.0532050 ± 0.0004232 | 0.00222606 ± 0.00004107 |
| 23F04482         | 21.2 % | 0.0216478 ± 0.0001018 | 0.00289322 ± 0.00002120 |
| 23F04484         | 23.5 % | 0.0612838 ± 0.0005794 | 0.00210297 ± 0.00005041 |

r.i.

0.0161  
0.0240  
0.0383  
0.0881  
0.2008  
**0.2832**  
**0.2765**  
**0.1888**  
**0.1771**  
**0.1927**  
**0.1693**  
**0.1789**  
**0.1924**  
**0.1804**  
0.1865  
0.2057  
0.2540  
0.2059  
0.1867  
0.2048  
0.1782  
0.1594  
0.1715  
0.1838  
0.1999  
0.1190  
0.1369  
0.1487  
0.1553  
0.2699  
0.1262  
0.2794

MSWD

1.68  
11%

915030  
4  
York-2

| Incremental Heating |        | 36Ar(a)<br>[fA] | 37Ar(ca)<br>[fA] | 38Ar(cl)<br>[fA] | 39Ar(k)<br>[fA] | 40Ar(r)<br>[fA] | Age ± 2σ<br>(Ma) | 40Ar(r)<br>(%) | 39Ar(k)<br>(%) | K/Ca ± 2σ       |
|---------------------|--------|-----------------|------------------|------------------|-----------------|-----------------|------------------|----------------|----------------|-----------------|
| 23F04441            | 0.7 %  | 0.0595402       | 0.801            | 0.0000957        | 0.01926         | 0.12853         | 20.47 ± 136.60   | 0.73           | 0.01           | 0.0103 ± 0.0093 |
| 23F04443            | 0.9 %  | 0.0240820       | 0.327            | 0.0030654        | 0.01166         | 0.13446         | 35.51 ± 227.00   | 1.91           | 0.01           | 0.0153 ± 0.0239 |
| 23F04445            | 1.2 %  | 0.0736845       | 2.455            | 0.0000000        | 0.06128         | 0.58157         | 28.73 ± 42.55    | 2.58           | 0.04           | 0.0107 ± 0.0031 |
| 23F04446            | 1.8 %  | 0.2710685       | 34.127           | 0.0022569        | 0.61840         | 2.77176         | 13.62 ± 4.83     | 3.31           | 0.36           | 0.0078 ± 0.0002 |
| 23F04447            | 2.3 %  | 0.1775437       | 69.147           | 0.0015412        | 1.14403         | 5.31888         | 14.13 ± 2.48     | 9.12           | 0.66           | 0.0071 ± 0.0001 |
| 23F04449            | 2.8 %  | 0.1357743       | 114.359          | 0.0000000        | 1.84116         | 10.58863        | 17.46 ± 1.52     | 20.71          | 1.07           | 0.0069 ± 0.0001 |
| 23F04450            | 3.4 %  | 0.1324263       | 255.249          | 0.0000000        | 4.02440         | 22.58985        | 17.04 ± 0.72     | 36.36          | 2.34           | 0.0068 ± 0.0000 |
| 23F04452            | 4.0 %  | 0.1501587       | 603.333          | 0.0000000        | 9.41977         | 53.51811        | 17.25 ± 0.35     | 54.41          | 5.47           | 0.0067 ± 0.0000 |
| 23F04453            | 4.7 %  | 0.1524873       | 694.797          | 0.0000000        | 10.88424        | 62.44563        | 17.42 ± 0.30     | 57.83          | 6.32           | 0.0067 ± 0.0000 |
| 23F04454            | 5.3 %  | 0.2073133       | 672.654          | 0.0000000        | 10.62966        | 58.71532        | 16.77 ± 0.32     | 48.68          | 6.17           | 0.0068 ± 0.0000 |
| 23F04456            | 6.0 %  | 0.2238643       | 814.260          | 0.0000000        | 12.90153        | 73.33445        | 17.26 ± 0.28     | 52.31          | 7.49           | 0.0068 ± 0.0000 |
| 23F04457            | 6.8 %  | 0.2790759       | 807.290          | 0.0000000        | 12.88605        | 72.07659        | 16.98 ± 0.29     | 46.38          | 7.48           | 0.0069 ± 0.0000 |
| 23F04458            | 7.5 %  | 0.2858846       | 731.819          | 0.0000000        | 11.75765        | 65.52813        | 16.92 ± 0.31     | 43.43          | 6.83           | 0.0069 ± 0.0000 |
| 23F04460            | 8.3 %  | 0.3351759       | 784.812          | 0.0000000        | 12.68280        | 71.53366        | 17.12 ± 0.31     | 41.68          | 7.36           | 0.0069 ± 0.0000 |
| 23F04461            | 9.1 %  | 0.3998833       | 624.798          | 0.0000000        | 10.16061        | 55.05601        | 16.46 ± 0.40     | 31.56          | 5.90           | 0.0070 ± 0.0000 |
| 23F04462            | 9.8 %  | 0.3942450       | 469.672          | 0.0000000        | 7.71629         | 41.25382        | 16.24 ± 0.49     | 25.95          | 4.48           | 0.0071 ± 0.0000 |
| 23F04464            | 10.5 % | 0.2696836       | 325.032          | 0.0000000        | 5.32089         | 29.07426        | 16.59 ± 0.61     | 26.53          | 3.09           | 0.0070 ± 0.0000 |
| 23F04465            | 11.0 % | 0.3745299       | 205.806          | 0.0000000        | 3.38109         | 15.92570        | 14.31 ± 1.01     | 12.47          | 1.96           | 0.0071 ± 0.0001 |
| 23F04466            | 11.5 % | 0.3051404       | 129.508          | 0.0000000        | 2.12073         | 9.46114         | 13.56 ± 1.53     | 9.41           | 1.23           | 0.0070 ± 0.0001 |
| 23F04468            | 12.0 % | 0.2804691       | 123.869          | 0.0000000        | 2.04893         | 10.38563        | 15.40 ± 1.50     | 11.03          | 1.19           | 0.0071 ± 0.0001 |
| 23F04469            | 12.5 % | 0.3109187       | 99.405           | 0.0000000        | 1.62136         | 5.73481         | 10.76 ± 1.93     | 5.82           | 0.94           | 0.0070 ± 0.0001 |
| 23F04470            | 13.0 % | 0.2656147       | 83.184           | 0.0000000        | 1.34507         | 5.22418         | 11.81 ± 2.29     | 6.18           | 0.78           | 0.0070 ± 0.0001 |
| 23F04472            | 13.5 % | 0.2930313       | 98.005           | 0.0000000        | 1.59404         | 5.83290         | 11.13 ± 1.94     | 6.25           | 0.93           | 0.0070 ± 0.0001 |
| 23F04473            | 14.5 % | 0.3106569       | 117.103          | 0.0000000        | 1.97534         | 8.42702         | 12.97 ± 1.60     | 8.33           | 1.15           | 0.0073 ± 0.0001 |
| 23F04474            | 15.0 % | 0.4029917       | 274.638          | 0.0000000        | 4.55381         | 24.52317        | 16.35 ± 0.80     | 16.93          | 2.64           | 0.0071 ± 0.0000 |
| 23F04476            | 15.6 % | 0.8561973       | 934.957          | 0.0000000        | 15.25565        | 86.97786        | 17.31 ± 0.37     | 25.39          | 8.86           | 0.0070 ± 0.0000 |
| 23F04477            | 16.2 % | 0.6850649       | 328.298          | 0.0000000        | 5.10440         | 25.18461        | 14.99 ± 0.88     | 10.96          | 2.96           | 0.0067 ± 0.0000 |
| 23F04478            | 17.0 % | 0.5586720       | 266.948          | 0.0000000        | 4.06642         | 22.27536        | 16.63 ± 0.99     | 11.78          | 2.36           | 0.0066 ± 0.0000 |
| 23F04480            | 17.9 % | 0.5446381       | 317.175          | 0.0000000        | 4.86201         | 30.20207        | 18.85 ± 0.84     | 15.66          | 2.82           | 0.0066 ± 0.0000 |
| 23F04481            | 19.0 % | 0.1632458       | 259.181          | 0.0000000        | 3.90173         | 24.59516        | 19.13 ± 0.75     | 33.54          | 2.26           | 0.0065 ± 0.0000 |
| 23F04482            | 21.2 % | 0.6419323       | 319.539          | 0.0000000        | 4.80309         | 30.21906        | 19.09 ± 0.93     | 13.62          | 2.79           | 0.0065 ± 0.0000 |
| 23F04484            | 23.5 % | 0.1220387       | 236.953          | 0.0000000        | 3.55640         | 21.59581        | 18.43 ± 0.81     | 37.21          | 2.06           | 0.0065 ± 0.0000 |

Σ 9.6870334 10799.501 0.0069591 172.26977 950.68814

| Information on Analysis                                                                                                                                                                                                                                    | Results          | 40(r)/39(k) ± 2σ             | Age ± 2σ<br>(Ma)                                      | MSWD           | 39Ar(k)<br>(%,n)                           | K/Ca ± 2σ       |
|------------------------------------------------------------------------------------------------------------------------------------------------------------------------------------------------------------------------------------------------------------|------------------|------------------------------|-------------------------------------------------------|----------------|--------------------------------------------|-----------------|
| Project = MASS (22-34)<br>Sample = MM-CRB-32<br>Material = Plagioclase<br>Location = Hells Canyon<br>Region = Snake Rvr. Valley<br>Analyst = Dan Miggins<br>Irradiation = 22-OSU-05 (5D10-22)<br>J = 0.00166647 ± 0.00000210<br>FCT-NM = 28.201 ± 0.023 Ma | Age Plateau      | 5.63524 ± 0.04775<br>± 0.85% | 17.11 ± 0.15<br>± 0.88%                               | 1.60<br>12%    | 50.52<br>9                                 | 0.0068 ± 0.0001 |
|                                                                                                                                                                                                                                                            |                  |                              | Full External Error ± 0.90<br>Analytical Error ± 0.14 | 2.00<br>1.2668 | 2σ Confidence Limit<br>Error Magnification |                 |
|                                                                                                                                                                                                                                                            | Total Fusion Age | 5.51860 ± 0.03783<br>± 0.69% | 16.76 ± 0.12<br>± 0.73%                               |                | 32                                         | 0.0069 ± 0.0000 |
|                                                                                                                                                                                                                                                            |                  |                              | Full External Error ± 0.88<br>Analytical Error ± 0.11 |                |                                            |                 |

| Normal Isochron |        | 39(k)/36(a) ± 2σ | 40(a+r)/36(a) ± 2σ | r.i.   |
|-----------------|--------|------------------|--------------------|--------|
| 23F04441        | 0.7 %  | 0.32 ± 0.29      | 296.40 ± 14.11     | 0.0373 |
| 23F04443        | 0.9 %  | 0.48 ± 0.75      | 292.98 ± 33.84     | 0.0509 |
| 23F04445        | 1.2 %  | 0.83 ± 0.24      | 306.45 ± 11.77     | 0.0967 |
| 23F04446        | 1.8 %  | 2.28 ± 0.07      | 308.79 ± 3.67      | 0.3056 |
| 23F04447        | 2.3 %  | 6.44 ± 0.14      | 328.52 ± 5.61      | 0.5991 |
| 23F04449        | 2.8 %  | 13.56 ± 0.30     | 376.55 ± 8.08      | 0.8071 |
| 23F04450        | 3.4 %  | 30.39 ± 0.66     | 469.14 ± 10.44     | 0.9167 |
| 23F04452        | 4.0 %  | 62.73 ± 1.36     | 654.97 ± 14.39     | 0.9705 |
| 23F04453        | 4.7 %  | 71.38 ± 1.51     | 708.07 ± 15.19     | 0.9745 |
| 23F04454        | 5.3 %  | 51.27 ± 0.86     | 581.78 ± 9.89      | 0.9646 |
| 23F04456        | 6.0 %  | 57.63 ± 0.94     | 626.14 ± 10.38     | 0.9725 |
| 23F04457        | 6.8 %  | 46.17 ± 0.63     | 556.83 ± 7.72      | 0.9667 |
| 23F04458        | 7.5 %  | 41.13 ± 0.53     | 527.77 ± 6.89      | 0.9586 |
| 23F04460        | 8.3 %  | 37.84 ± 0.45     | 511.98 ± 6.19      | 0.9616 |
| 23F04461        | 9.1 %  | 25.41 ± 0.27     | 436.24 ± 4.63      | 0.9434 |
| 23F04462        | 9.8 %  | 19.57 ± 0.20     | 403.20 ± 4.06      | 0.9181 |
| 23F04464        | 10.5 % | 19.73 ± 0.24     | 406.37 ± 5.10      | 0.8996 |
| 23F04465        | 11.0 % | 9.03 ± 0.09      | 341.08 ± 3.29      | 0.7877 |
| 23F04466        | 11.5 % | 6.95 ± 0.09      | 329.57 ± 3.74      | 0.6963 |
| 23F04468        | 12.0 % | 7.31 ± 0.10      | 335.59 ± 3.90      | 0.6944 |
| 23F04469        | 12.5 % | 5.21 ± 0.07      | 317.00 ± 3.42      | 0.6144 |
| 23F04470        | 13.0 % | 5.06 ± 0.09      | 318.23 ± 3.96      | 0.5595 |
| 23F04472        | 13.5 % | 5.44 ± 0.08      | 318.47 ± 3.60      | 0.5934 |
| 23F04473        | 14.5 % | 6.36 ± 0.09      | 325.69 ± 3.52      | 0.6526 |
| 23F04474        | 15.0 % | 11.30 ± 0.11     | 359.41 ± 3.43      | 0.8521 |
| 23F04476        | 15.6 % | 17.82 ± 0.12     | 400.15 ± 2.73      | 0.9461 |
| 23F04477        | 16.2 % | 7.45 ± 0.06      | 335.32 ± 2.29      | 0.8235 |
| 23F04478        | 17.0 % | 7.28 ± 0.06      | 338.43 ± 2.57      | 0.7923 |
| 23F04480        | 17.9 % | 8.93 ± 0.08      | 354.01 ± 2.78      | 0.8377 |
| 23F04481        | 19.0 % | 23.90 ± 0.43     | 449.22 ± 8.29      | 0.9051 |
| 23F04482        | 21.2 % | 7.48 ± 0.06      | 345.64 ± 2.53      | 0.8220 |
| 23F04484        | 23.5 % | 29.14 ± 0.68     | 475.52 ± 11.40     | 0.9201 |

| Results         | 40(a)/36(a) ± 2σ                                                    | 40(r)/39(k) ± 2σ             | Age ± 2σ<br>(Ma)                                       | MSWD                                    |
|-----------------|---------------------------------------------------------------------|------------------------------|--------------------------------------------------------|-----------------------------------------|
| Normal Isochron | 295.14 ± 7.99<br>± 2.71%                                            | 5.70362 ± 0.17143<br>± 3.01% | 17.32 ± 0.52<br>± 3.00%                                | 1.68<br>11%                             |
|                 |                                                                     |                              | Full External Error ± 1.04<br>Analytical Error ± 0.52  |                                         |
| Statistics      | 2σ Confidence Limit<br>Error Magnification<br>Number of Data Points | 2.07<br>1.2978<br>9          | Convergence<br>Number of Iterations<br>Calculated Line | 0.000053800528<br>10<br>Weighted York-2 |

| Degassing Patterns |        | 36Ar(a)<br>[fA] | %1σ  | 36Ar(c)<br>[fA] | %1σ  | 36Ar(ca)<br>[fA] | %1σ   | 36Ar(cl)<br>[fA] | %1σ    | 37Ar(ca)<br>[fA] | %1σ   | 38Ar(a)<br>[fA] | %1σ  | 38Ar(c)<br>[fA] | %1σ  | 38Ar(k)<br>[fA] | %1σ   | 38Ar(ca)<br>[fA] | %1σ   | 38Ar(cl)<br>[fA] | %1σ    | 39Ar(k)<br>[fA] | %1σ   | 39Ar(ca)<br>[fA] | %1σ   | 40Ar(r)<br>[fA] | %1σ    | 40Ar(a)<br>[fA] | %1σ  | 40Ar(c)<br>[fA] | %1σ  | 40Ar(k)<br>[fA] | %1σ   |
|--------------------|--------|-----------------|------|-----------------|------|------------------|-------|------------------|--------|------------------|-------|-----------------|------|-----------------|------|-----------------|-------|------------------|-------|------------------|--------|-----------------|-------|------------------|-------|-----------------|--------|-----------------|------|-----------------|------|-----------------|-------|
| 23F04441           | 0.7 %  | 0.0595402       | 1.99 | 0.0000000       | 0.00 | 0.00002166       | 4.94  | 0.00000000       | #####  | 0.801            | 4.93  | 0.0112233       | 2.00 | 0.00000000      | 0.00 | 0.00002326      | 44.50 | 0.0001442        | 10.82 | 0.0000957        | #####  | 0.01926         | 44.50 | 0.0005148        | 5.02  | 0.12853         | 328.82 | 17.7763         | 1.99 | 0.00000000      | 0.00 | 0.0000117       | 45.54 |
| 23F04443           | 0.9 %  | 0.0240820       | 4.76 | 0.0000000       | 0.00 | 0.00000885       | 12.58 | 0.00000003       | 291.57 | 0.327            | 12.58 | 0.0045394       | 4.76 | 0.00000000      | 0.00 | 0.0001408       | 77.03 | 0.0000589        | 15.84 | 0.0030654        | 291.57 | 0.01166         | 77.03 | 0.0002103        | 12.62 | 0.13446         | 307.00 | 7.1899          | 4.76 | 0.00000000      | 0.00 | 0.0000071       | 77.63 |
| 23F04445           | 1.2 %  | 0.0736845       | 1.63 | 0.0000000       | 0.00 | 0.00006635       | 1.71  | 0.00000000       | 0.00   | 2.455            | 1.70  | 0.0138895       | 1.63 | 0.00000000      | 0.00 | 0.0007400       | 14.14 | 0.0004419        | 9.78  | 0.00000000       | 0.00   | 0.06128         | 14.14 | 0.0015772        | 1.94  | 0.58157         | 73.29  | 21.9993         | 1.63 | 0.00000000      | 0.00 | 0.0000372       | 17.12 |
| 23F04446           | 1.8 %  | 0.2710685       | 0.53 | 0.0000000       | 0.00 | 0.0092245        | 0.32  | 0.00000002       | 406.14 | 34.127           | 0.27  | 0.0510964       | 0.55 | 0.00000000      | 0.00 | 0.0074685       | 1.43  | 0.0061429        | 9.63  | 0.0022569        | 406.15 | 0.61840         | 1.43  | 0.0219266        | 0.96  | 2.77176         | 17.73  | 80.9302         | 0.54 | 0.00000000      | 0.00 | 0.0003754       | 9.76  |
| 23F04447           | 2.3 %  | 0.1775437       | 0.76 | 0.0000000       | 0.00 | 0.0186903        | 0.30  | 0.00000002       | 617.55 | 69.147           | 0.24  | 0.0334670       | 0.77 | 0.00000000      | 0.00 | 0.0138165       | 0.83  | 0.0124464        | 9.63  | 0.0015412        | 617.55 | 1.14403         | 0.82  | 0.0444267        | 0.95  | 5.31888         | 8.76   | 53.0075         | 0.76 | 0.00000000      | 0.00 | 0.0006944       | 9.69  |
| 23F04449           | 2.8 %  | 0.1357743       | 0.97 | 0.00000000      | 0.00 | 0.0309113        | 0.29  | 0.00000000       | 0.00   | 114.359          | 0.24  | 0.0255935       | 0.99 | 0.00000000      | 0.00 | 0.0222357       | 0.51  | 0.0205847        | 9.63  | 0.00000000       | 0.00   | 1.84116         | 0.50  | 0.0734758        | 0.95  | 10.58863        | 4.33   | 40.5368         | 0.98 | 0.00000000      | 0.00 | 0.0011176       | 9.66  |
| 23F04450           | 3.4 %  | 0.1324263       | 1.05 | 0.00000000      | 0.00 | 0.0689939        | 0.29  | 0.00000000       | 0.00   | 255.249          | 0.23  | 0.0249624       | 1.06 | 0.00000000      | 0.00 | 0.0486027       | 0.27  | 0.0459449        | 9.63  | 0.00000000       | 0.00   | 4.02440         | 0.25  | 0.1639977        | 0.95  | 22.58985        | 2.11   | 39.5372         | 1.05 | 0.00000000      | 0.00 | 0.0024428       | 9.65  |
| 23F04452           | 4.0 %  | 0.1501587       | 1.07 | 0.00000000      | 0.00 | 0.1630808        | 0.29  | 0.00000000       | 0.00   | 603.333          | 0.23  | 0.0283049       | 1.09 | 0.00000000      | 0.00 | 0.1137626       | 0.15  | 0.1085999        | 9.63  | 0.00000000       | 0.00   | 9.41977         | 0.12  | 0.3876411        | 0.95  | 53.51811        | 1.00   | 44.8314         | 1.08 | 0.00000000      | 0.00 | 0.0057178       | 9.65  |
| 23F04453           | 4.7 %  | 0.1524873       | 1.05 | 0.00000000      | 0.00 | 0.1878037        | 0.29  | 0.00000000       | 0.00   | 694.797          | 0.23  | 0.0287439       | 1.06 | 0.00000000      | 0.00 | 0.1314490       | 0.14  | 0.1250635        | 9.63  | 0.00000000       | 0.00   | 10.88424        | 0.11  | 0.4464072        | 0.95  | 62.44563        | 0.85   | 45.5266         | 1.06 | 0.00000000      | 0.00 | 0.0066067       | 9.65  |
| 23F04454           | 5.3 %  | 0.2073133       | 0.83 | 0.00000000      | 0.00 | 0.1818184        | 0.29  | 0.00000000       | 0.00   | 672.654          | 0.23  | 0.0390786       | 0.84 | 0.00000000      | 0.00 | 0.1283744       | 0.15  | 0.1210777        | 9.63  | 0.00000000       | 0.00   | 10.62966        | 0.12  | 0.4321802        | 0.95  | 58.71532        | 0.96   | 61.8955         | 0.83 | 0.00000000      | 0.00 | 0.0064522       | 9.65  |
| 23F04456           | 6.0 %  | 0.2238643       | 0.81 | 0.00000000      | 0.00 | 0.2200945        | 0.29  | 0.00000000       | 0.00   | 814.260          | 0.23  | 0.0421984       | 0.83 | 0.00000000      | 0.00 | 0.1558118       | 0.14  | 0.1465668        | 9.63  | 0.00000000       | 0.00   | 12.90153        | 0.10  | 0.5231621        | 0.95  | 73.33445        | 0.81   | 66.8369         | 0.82 | 0.00000000      | 0.00 | 0.0078312       | 9.65  |
| 23F04457           | 6.8 %  | 0.2790759       | 0.68 | 0.00000000      | 0.00 | 0.2182105        | 0.29  | 0.00000000       | 0.00   | 807.290          | 0.23  | 0.0526058       | 0.70 | 0.00000000      | 0.00 | 0.1556248       | 0.13  | 0.1453122        | 9.63  | 0.00000000       | 0.00   | 12.88605        | 0.10  | 0.5186838        | 0.95  | 72.07659        | 0.85   | 83.3209         | 0.68 | 0.00000000      | 0.00 | 0.0078218       | 9.65  |
| 23F04458           | 7.5 %  | 0.2858846       | 0.63 | 0.00000000      | 0.00 | 0.1978107        | 0.29  | 0.00000000       | 0.00   | 731.819          | 0.23  | 0.0538892       | 0.65 | 0.00000000      | 0.00 | 0.1419971       | 0.14  | 0.1317274        | 9.63  | 0.00000000       | 0.00   | 11.75765        | 0.11  | 0.4701937        | 0.95  | 65.52813        | 0.91   | 85.3537         | 0.64 | 0.00000000      | 0.00 | 0.0071369       | 9.65  |
| 23F04460           | 8.3 %  | 0.3351759       | 0.59 | 0.00000000      | 0.00 | 0.2121346        | 0.29  | 0.00000000       | 0.00   | 784.812          | 0.23  | 0.0631807       | 0.61 | 0.00000000      | 0.00 | 0.1531702       | 0.13  | 0.1412661        | 9.63  | 0.00000000       | 0.00   | 12.68280        | 0.10  | 0.5042416        | 0.95  | 71.53366        | 0.90   | 100.0701        | 0.60 | 0.00000000      | 0.00 | 0.0076985       | 9.65  |
| 23F04461           | 9.1 %  | 0.3998833       | 0.51 | 0.00000000      | 0.00 | 0.1688829        | 0.29  | 0.00000000       | 0.00   | 624.798          | 0.23  | 0.0753780       | 0.54 | 0.00000000      | 0.00 | 0.1227097       | 0.15  | 0.1124636        | 9.63  | 0.00000000       | 0.00   | 10.16061        | 0.12  | 0.4014326        | 0.95  | 55.05601        | 1.21   | 119.3892        | 0.52 | 0.00000000      | 0.00 | 0.0061675       | 9.65  |
| 23F04462           | 9.8 %  | 0.3942450       | 0.48 | 0.00000000      | 0.00 | 0.1269522        | 0.29  | 0.00000000       | 0.00   | 469.672          | 0.23  | 0.0743152       | 0.51 | 0.00000000      | 0.00 | 0.0931896       | 0.17  | 0.0845409        | 9.63  | 0.00000000       | 0.00   | 7.71629         | 0.14  | 0.3017640        | 0.95  | 41.25382        | 1.52   | 117.7058        | 0.49 | 0.00000000      | 0.00 | 0.0046838       | 9.65  |
| 23F04464           | 10.5 % | 0.2696836       | 0.59 | 0.00000000      | 0.00 | 0.0878562        | 0.29  | 0.00000000       | 0.00   | 325.032          | 0.23  | 0.0508354       | 0.61 | 0.00000000      | 0.00 | 0.0642604       | 0.20  | 0.0585058        | 9.63  | 0.00000000       | 0.00   | 5.32089         | 0.18  | 0.2088333        | 0.95  | 29.07426        | 1.84   | 80.5167         | 0.60 | 0.00000000      | 0.00 | 0.0032298       | 9.65  |
| 23F04465           | 11.0 % | 0.3745299       | 0.45 | 0.00000000      | 0.00 | 0.0556295        | 0.29  | 0.00000000       | 0.00   | 205.806          | 0.23  | 0.0705989       | 0.47 | 0.00000000      | 0.00 | 0.0408334       | 0.29  | 0.0370452        | 9.63  | 0.00000000       | 0.00   | 3.38109         | 0.28  | 0.1322306        | 0.95  | 15.92570        | 3.53   | 111.8196        | 0.46 | 0.00000000      | 0.00 | 0.0020523       | 9.65  |
| 23F04466           | 11.5 % | 0.3051404       | 0.52 | 0.00000000      | 0.00 | 0.0350061        | 0.29  | 0.00000000       | 0.00   | 129.508          | 0.24  | 0.0575190       | 0.54 | 0.00000000      | 0.00 | 0.0256121       | 0.45  | 0.0233115        | 9.63  | 0.00000000       | 0.00   | 2.12073         | 0.44  | 0.0832092        | 0.95  | 9.46114         | 5.65   | 91.1027         | 0.53 | 0.00000000      | 0.00 | 0.0012873       | 9.66  |
| 23F04468           | 12.0 % | 0.2804691       | 0.53 | 0.00000000      | 0.00 | 0.0334819        | 0.29  | 0.00000000       | 0.00   | 123.869          | 0.24  | 0.0528684       | 0.55 | 0.00000000      | 0.00 | 0.0247449       | 0.45  | 0.0222965        | 9.63  | 0.00000000       | 0.00   | 2.04893         | 0.44  | 0.0795860        | 0.95  | 10.38563        | 4.86   | 83.7369         | 0.54 | 0.00000000      | 0.00 | 0.0012437       | 9.66  |
| 23F04469           | 12.5 % | 0.3109187       | 0.49 | 0.00000000      | 0.00 | 0.0268692        | 0.29  | 0.00000000       | 0.00   | 99.405           | 0.24  | 0.0586082       | 0.51 | 0.00000000      | 0.00 | 0.0195812       | 0.53  | 0.0178929        | 9.63  | 0.00000000       | 0.00   | 1.62136         | 0.52  | 0.0638679        | 0.95  | 5.73481         | 8.99   | 92.8279         | 0.50 | 0.00000000      | 0.00 | 0.0009842       | 9.66  |
| 23F04470           | 13.0 % | 0.2656147       | 0.56 | 0.00000000      | 0.00 | 0.0224846        | 0.29  | 0.00000000       | 0.00   | 83.184           | 0.24  | 0.0500684       | 0.58 | 0.00000000      | 0.00 | 0.0162444       | 0.71  | 0.0149731        | 9.63  | 0.00000000       | 0.00   | 1.34507         | 0.70  | 0.0534455        | 0.95  | 5.22418         | 9.69   | 79.3019         | 0.57 | 0.00000000      | 0.00 | 0.0008165       | 9.68  |
| 23F04472           | 13.5 % | 0.2930313       | 0.51 | 0.00000000      | 0.00 | 0.0264908        | 0.29  | 0.00000000       | 0.00   | 98.005           | 0.24  | 0.0552364       | 0.53 | 0.00000000      | 0.00 | 0.0192513       | 0.59  | 0.0176409        | 9.63  | 0.00000000       | 0.00   | 1.59404         | 0.58  | 0.0629683        | 0.95  | 5.83290         | 8.74   | 87.4874         | 0.52 | 0.00000000      | 0.00 | 0.0009676       | 9.67  |
| 23F04473           | 14.5 % | 0.3106569       | 0.49 | 0.00000000      | 0.00 | 0.0316529        | 0.29  | 0.00000000       | 0.00   | 117.103          | 0.24  | 0.0585588       | 0.52 | 0.00000000      | 0.00 | 0.0238562       | 0.48  | 0.0210785        | 9.63  | 0.00000000       | 0.00   | 1.97534         | 0.47  | 0.0752386        | 0.95  | 8.42702         | 6.15   | 92.7497         | 0.50 | 0.00000000      | 0.00 | 0.0011990       | 9.66  |
| 23F04474           | 15.0 % | 0.4029917       | 0.45 | 0.00000000      | 0.00 | 0.0742347        | 0.29  | 0.00000000       | 0.00   | 274.638          | 0.23  | 0.0759639       | 0.48 | 0.00000000      | 0.00 | 0.0549963       | 0.23  | 0.0494349        | 9.63  | 0.00000000       | 0.00   | 4.55381         | 0.21  | 0.1764550        | 0.95  | 24.52317        | 2.46   | 120.3172        | 0.46 | 0.00000000      | 0.00 | 0.0027642       | 9.65  |
| 23F04476           | 15.6 % | 0.8561973       | 0.33 | 0.00000000      | 0.00 | 0.2527188        | 0.29  | 0.00000000       | 0.00   | 934.957          | 0.23  | 0.1613932       | 0.37 | 0.00000000      | 0.00 | 0.1842425       | 0.13  | 0.1682922        | 9.63  | 0.00000000       | 0.00   | 15.25565        | 0.09  | 0.6007098        | 0.95  | 86.97786        | 1.06   | 255.6263        | 0.35 | 0.00000000      | 0.00 | 0.0092602       | 9.65  |
| 23F04477           | 16.2 % | 0.6850649       | 0.33 | 0.00000000      | 0.00 | 0.0887389        | 0.29  | 0.00000000       | 0.00   | 328.298          | 0.23  | 0.1291347       | 0.36 | 0.00000000      | 0.00 | 0.0616458       | 0.21  | 0.0590936        | 9.63  | 0.00000000       | 0.00   | 5.10440         | 0.19  | 0.2109314        | 0.95  | 25.18461        | 2.93   | 204.5330        | 0.34 | 0.00000000      | 0.00 | 0.0030984       | 9.65  |
| 23F04478           | 17.0 % | 0.5586720       | 0.36 | 0.00000000      | 0.00 | 0.0721561        | 0.29  | 0.00000000       | 0.00   | 266.948          | 0.23  | 0.1053097       | 0.39 | 0.00000000      | 0.00 | 0.0491102       | 0.25  | 0.0480507        | 9.63  | 0.00000000       | 0.00   | 4.06642         | 0.24  | 0.1715142        | 0.95  | 22.27536        | 2.99   | 166.7971        | 0.37 | 0.00000000      | 0.00 | 0.0024683       | 9.65  |
| 23F04480           | 17.9 % | 0.5446381       | 0.37 | 0.00000000      | 0.00 | 0.0857323        | 0.29  | 0.00000000       | 0.00   | 317.175          | 0.23  | 0.1026643       | 0.41 | 0.00000000      | 0.00 | 0.0587184       | 0.22  | 0.0570914        | 9.63  | 0.00000000       | 0.00   | 4.86201         | 0.20  | 0.2037846        | 0.95  | 30.20207        | 2.23   | 162.6071        | 0.39 | 0.00000000      | 0.00 | 0.0029512       | 9.65  |
| 23F04481           | 19.0 % | 0.1632458       | 0.87 | 0.00000000      | 0.00 | 0.0700565        | 0.29  | 0.00000000       | 0.00   | 259.181          | 0.23  | 0.0307718       | 0.88 | 0.00000000      | 0.00 | 0.0471212       | 0.26  | 0.0466525        | 9.63  | 0.00000000       | 0.00   | 3.90173         | 0.24  | 0.1665236        | 0.95  | 24.59516        | 1.97   | 48.7387         | 0.87 | 0.00000000      | 0.00 | 0.0023683       | 9.65  |
| 23F04482           | 21.2 % | 0.6419323       | 0.35 | 0.00000000      | 0.00 | 0.0863713        | 0.29  | 0.00000000       | 0.00   | 319.539          |       |                 |      |                 |      |                 |       |                  |       |                  |        |                 |       |                  |       |                 |        |                 |      |                 |      |                 |       |

| Additional Parameters |        | 40Ar/39Ar  | 1σ         | 37Ar/39Ar | 1σ        | 36Ar/39Ar | 1σ       | Time (days) | 37Ar (decay) | 39Ar (decay) | 40Ar (moles) |
|-----------------------|--------|------------|------------|-----------|-----------|-----------|----------|-------------|--------------|--------------|--------------|
| 23F04441              | 0.7 %  | 892.362738 | 386.958975 | 40.513972 | 17.673650 | 3.021607  | 1.311047 | 65.714      | 3.670944     | 1.00046467   | 6.247E-13    |
| 23F04443              | 0.9 %  | 594.268445 | 450.068176 | 27.565877 | 21.143946 | 2.035859  | 1.543442 | 65.733      | 3.672303     | 1.00046480   | 2.498E-13    |
| 23F04445              | 1.2 %  | 359.267938 | 49.664785  | 39.057310 | 5.425382  | 1.182899  | 0.164186 | 65.751      | 3.673613     | 1.00046493   | 7.994E-13    |
| 23F04446              | 1.8 %  | 130.717591 | 1.840364   | 53.296092 | 0.749294  | 0.437733  | 0.006440 | 65.760      | 3.674268     | 1.00046499   | 2.963E-12    |
| 23F04447              | 2.3 %  | 49.077874  | 0.434689   | 58.181800 | 0.482024  | 0.165117  | 0.001728 | 65.769      | 3.674924     | 1.00046505   | 2.065E-12    |
| 23F04449              | 2.8 %  | ✓26.702952 | 0.175614   | 59.728877 | 0.318482  | 0.087058  | 0.000804 | 65.787      | 3.676234     | 1.00046518   | 1.810E-12    |
| 23F04450              | 3.4 %  | ✓14.833710 | 0.065450   | 60.942006 | 0.203585  | 0.048090  | 0.000348 | 65.797      | 3.676940     | 1.00046525   | 2.199E-12    |
| 23F04452              | 4.0 %  | ✓10.028660 | 0.026112   | 61.518010 | 0.159519  | 0.031939  | 0.000161 | 65.815      | 3.678252     | 1.00046538   | 3.482E-12    |
| 23F04453              | 4.7 %  | ✓9.529804  | 0.022481   | 61.320161 | 0.155586  | 0.030033  | 0.000136 | 65.824      | 3.678908     | 1.00046544   | 3.822E-12    |
| 23F04454              | 5.3 %  | ✓10.903904 | 0.023897   | 60.808515 | 0.155932  | 0.035178  | 0.000152 | 65.833      | 3.679564     | 1.00046551   | 4.270E-12    |
| 23F04456              | 6.0 %  | ✓10.441894 | 0.019629   | 60.653902 | 0.151763  | 0.033070  | 0.000130 | 65.851      | 3.680876     | 1.00046563   | 4.962E-12    |
| 23F04457              | 6.8 %  | ✓11.593318 | 0.019944   | 60.224242 | 0.149948  | 0.037098  | 0.000137 | 65.860      | 3.681583     | 1.00046570   | 5.501E-12    |
| 23F04458              | 7.5 %  | ✓12.339786 | 0.022316   | 59.848581 | 0.151088  | 0.039557  | 0.000146 | 65.869      | 3.682240     | 1.00046577   | 5.341E-12    |
| 23F04460              | 8.3 %  | ✓13.013641 | 0.020870   | 59.513851 | 0.148247  | 0.041504  | 0.000147 | 65.887      | 3.683553     | 1.00046589   | 6.075E-12    |
| 23F04461              | 9.1 %  | 16.516814  | 0.028277   | 59.155008 | 0.152249  | 0.053850  | 0.000198 | 65.897      | 3.684210     | 1.00046596   | 6.176E-12    |
| 23F04462              | 9.8 %  | 19.825798  | 0.039016   | 58.576779 | 0.157393  | 0.065003  | 0.000248 | 65.906      | 3.684867     | 1.00046602   | 5.627E-12    |
| 23F04464              | 10.5 % | 19.819108  | 0.053971   | 58.779115 | 0.170856  | 0.064658  | 0.000305 | 65.924      | 3.686182     | 1.00046615   | 3.880E-12    |
| 23F04465              | 11.0 % | 36.360888  | 0.116358   | 58.578912 | 0.206940  | 0.122437  | 0.000573 | 65.933      | 3.686890     | 1.00046622   | 4.522E-12    |
| 23F04466              | 11.5 % | 45.629727  | 0.219647   | 58.762241 | 0.284828  | 0.154336  | 0.000969 | 65.942      | 3.687547     | 1.00046628   | 3.560E-12    |
| 23F04468              | 12.0 % | 44.220356  | 0.216483   | 58.195134 | 0.282503  | 0.147498  | 0.000933 | 65.960      | 3.688862     | 1.00046641   | 3.332E-12    |
| 23F04469              | 12.5 % | 58.486822  | 0.322758   | 58.986211 | 0.326389  | 0.200440  | 0.001343 | 65.969      | 3.689520     | 1.00046647   | 3.489E-12    |
| 23F04470              | 13.0 % | 60.440360  | 0.439266   | 59.479927 | 0.425252  | 0.206003  | 0.001746 | 65.978      | 3.690178     | 1.00046653   | 2.992E-12    |
| 23F04472              | 13.5 % | 56.319048  | 0.342900   | 59.145717 | 0.358163  | 0.192830  | 0.001399 | 65.998      | 3.691596     | 1.00046667   | 3.304E-12    |
| 23F04473              | 14.5 % | 49.341115  | 0.250484   | 57.107180 | 0.292277  | 0.166933  | 0.001059 | 66.008      | 3.692305     | 1.00046674   | 3.582E-12    |
| 23F04474              | 15.0 % | 30.620526  | 0.078831   | 58.059804 | 0.179725  | 0.100888  | 0.000432 | 66.017      | 3.692963     | 1.00046680   | 5.127E-12    |
| 23F04476              | 15.6 % | 21.607315  | 0.022555   | 58.964151 | 0.145535  | 0.069935  | 0.000183 | 66.035      | 3.694281     | 1.00046693   | 1.213E-11    |
| 23F04477              | 16.2 % | 43.218504  | 0.089285   | 61.764324 | 0.182623  | 0.145580  | 0.000493 | 66.044      | 3.694939     | 1.00046700   | 8.132E-12    |
| 23F04478              | 17.0 % | 44.614873  | 0.113176   | 62.990154 | 0.203472  | 0.148853  | 0.000576 | 66.053      | 3.695598     | 1.00046706   | 6.693E-12    |
| 23F04480              | 17.9 % | 38.061617  | 0.085713   | 62.611067 | 0.189126  | 0.124437  | 0.000465 | 66.072      | 3.696967     | 1.00046719   | 6.826E-12    |
| 23F04481              | 19.0 % | 18.026463  | 0.070266   | 63.708115 | 0.209315  | 0.057347  | 0.000369 | 66.081      | 3.697626     | 1.00046726   | 2.596E-12    |
| 23F04482              | 21.2 % | 44.301062  | 0.099267   | 63.800585 | 0.195944  | 0.145417  | 0.000532 | 66.090      | 3.698286     | 1.00046732   | 7.854E-12    |
| 23F04484              | 23.5 % | 15.648257  | 0.072848   | 63.892112 | 0.215356  | 0.050177  | 0.000388 | 66.108      | 3.699605     | 1.00046745   | 2.054E-12    |

| Procedure Blanks |        | 36Ar ± 1σ (SE) [fA]   | 37Ar ± 1σ (SE) [fA]   | 38Ar ± 1σ (SE) [fA]   | 39Ar ± 1σ (SE) [fA]   | 40Ar ± 1σ (SE) [fA]   |
|------------------|--------|-----------------------|-----------------------|-----------------------|-----------------------|-----------------------|
| 23F04441         | 0.7 %  | 0.0256576 ± 0.0010500 | 0.0244351 ± 0.0090544 | 0.0022825 ± 0.0065114 | 0.0013091 ± 0.0062881 | 7.5560732 ± 0.2299757 |
| 23F04443         | 0.9 %  | 0.0256726 ± 0.0010500 | 0.0241849 ± 0.0090544 | 0.0048809 ± 0.0065114 | 0.0074932 ± 0.0062881 | 7.4598890 ± 0.2299757 |
| 23F04445         | 1.2 %  | 0.0257186 ± 0.0010500 | 0.0247560 ± 0.0090544 | 0.0059771 ± 0.0065114 | 0.0126622 ± 0.0062881 | 7.4111341 ± 0.2299757 |
| 23F04446         | 1.8 %  | 0.0257486 ± 0.0010500 | 0.0252568 ± 0.0090544 | 0.0061301 ± 0.0065114 | 0.0149403 ± 0.0062881 | 7.3994179 ± 0.2299757 |
| 23F04447         | 2.3 %  | 0.0257811 ± 0.0010500 | 0.0258617 ± 0.0090544 | 0.0060784 ± 0.0065114 | 0.0170075 ± 0.0062881 | 7.3944662 ± 0.2299757 |
| 23F04449         | 2.8 %  | 0.0258477 ± 0.0010500 | 0.0272789 ± 0.0090544 | 0.0055206 ± 0.0065114 | 0.0204965 ± 0.0062881 | 7.4002737 ± 0.2299757 |
| 23F04450         | 3.4 %  | 0.0258817 ± 0.0010500 | 0.0281037 ± 0.0090544 | 0.0050513 ± 0.0065114 | 0.0220150 ± 0.0062881 | 7.4097106 ± 0.2299757 |
| 23F04452         | 4.0 %  | 0.0259353 ± 0.0010500 | 0.0296457 ± 0.0090544 | 0.0040343 ± 0.0065114 | 0.0241668 ± 0.0062881 | 7.4340697 ± 0.2299757 |
| 23F04453         | 4.7 %  | 0.0259558 ± 0.0010500 | 0.0303875 ± 0.0090544 | 0.0035123 ± 0.0065114 | 0.0249210 ± 0.0062881 | 7.4478985 ± 0.2299757 |
| 23F04454         | 5.3 %  | 0.0259709 ± 0.0010500 | 0.0310912 ± 0.0090544 | 0.0030142 ± 0.0065114 | 0.0254652 ± 0.0062881 | 7.4618526 ± 0.2299757 |
| 23F04456         | 6.0 %  | 0.0259831 ± 0.0010500 | 0.0323417 ± 0.0090544 | 0.0021720 ± 0.0065114 | 0.0259449 ± 0.0062881 | 7.4876607 ± 0.2299757 |
| 23F04457         | 6.8 %  | 0.0259788 ± 0.0010500 | 0.0329108 ± 0.0090544 | 0.0018422 ± 0.0065114 | 0.0258821 ± 0.0062881 | 7.4992165 ± 0.2299757 |
| 23F04458         | 7.5 %  | 0.0259676 ± 0.0010500 | 0.0333668 ± 0.0090544 | 0.0016328 ± 0.0065114 | 0.0256343 ± 0.0062881 | 7.5078726 ± 0.2299757 |
| 23F04460         | 8.3 %  | 0.0259242 ± 0.0010500 | 0.0340624 ± 0.0090544 | 0.0015326 ± 0.0065114 | 0.0246323 ± 0.0062881 | 7.5178995 ± 0.2299757 |
| 23F04461         | 9.1 %  | 0.0258922 ± 0.0010500 | 0.0343043 ± 0.0090544 | 0.0016538 ± 0.0065114 | 0.0239011 ± 0.0062881 | 7.5188252 ± 0.2299757 |
| 23F04462         | 9.8 %  | 0.0258538 ± 0.0010500 | 0.0344806 ± 0.0090544 | 0.0018929 ± 0.0065114 | 0.0230340 ± 0.0062881 | 7.5168528 ± 0.2299757 |
| 23F04464         | 10.5 % | 0.0257591 ± 0.0010500 | 0.0346654 ± 0.0090544 | 0.0027187 ± 0.0065114 | 0.0209513 ± 0.0062881 | 7.5041418 ± 0.2299757 |
| 23F04465         | 11.0 % | 0.0256996 ± 0.0010500 | 0.0346946 ± 0.0090544 | 0.0033444 ± 0.0065114 | 0.0196743 ± 0.0062881 | 7.4926282 ± 0.2299757 |
| 23F04466         | 11.5 % | 0.0256402 ± 0.0010500 | 0.0346956 ± 0.0090544 | 0.0040269 ± 0.0065114 | 0.0184161 ± 0.0062881 | 7.4792517 ± 0.2299757 |
| 23F04468         | 12.0 % | 0.0255130 ± 0.0010500 | 0.0346878 ± 0.0090544 | 0.0056346 ± 0.0065114 | 0.0157712 ± 0.0062881 | 7.4458983 ± 0.2299757 |
| 23F04469         | 12.5 % | 0.0254475 ± 0.0010500 | 0.0347169 ± 0.0090544 | 0.0065278 ± 0.0065114 | 0.0144268 ± 0.0062881 | 7.4266783 ± 0.2299757 |
| 23F04470         | 13.0 % | 0.0253823 ± 0.0010500 | 0.0347968 ± 0.0090544 | 0.0074546 ± 0.0065114 | 0.0130981 ± 0.0062881 | 7.4063913 ± 0.2299757 |
| 23F04472         | 13.5 % | 0.0252501 ± 0.0010500 | 0.0352592 ± 0.0090544 | 0.0094544 ± 0.0065114 | 0.0104045 ± 0.0062881 | 7.3618273 ± 0.2299757 |
| 23F04473         | 14.5 % | 0.0251922 ± 0.0010500 | 0.0357076 ± 0.0090544 | 0.0103895 ± 0.0065114 | 0.0092080 ± 0.0062881 | 7.3407764 ± 0.2299757 |
| 23F04474         | 15.0 % | 0.0251459 ± 0.0010500 | 0.0362987 ± 0.0090544 | 0.0111741 ± 0.0065114 | 0.0082270 ± 0.0062881 | 7.3231070 ± 0.2299757 |
| 23F04476         | 15.6 % | 0.0250829 ± 0.0010500 | 0.0381255 ± 0.0090544 | 0.0123590 ± 0.0065114 | 0.0067611 ± 0.0062881 | 7.2968480 ± 0.2299757 |
| 23F04477         | 16.2 % | 0.0250705 ± 0.0010500 | 0.0394352 ± 0.0090544 | 0.0126824 ± 0.0065114 | 0.0063382 ± 0.0062881 | 7.2902401 ± 0.2299757 |
| 23F04478         | 17.0 % | 0.0250738 ± 0.0010500 | 0.0410621 ± 0.0090544 | 0.0127706 ± 0.0065114 | 0.0061653 ± 0.0062881 | 7.2894251 ± 0.2299757 |
| 23F04480         | 17.9 % | 0.0251421 ± 0.0010500 | 0.0456421 ± 0.0090544 | 0.0120028 ± 0.0065114 | 0.0067538 ± 0.0062881 | 7.3114394 ± 0.2299757 |
| 23F04481         | 19.0 % | 0.0252099 ± 0.0010500 | 0.0485215 ± 0.0090544 | 0.0110717 ± 0.0065114 | 0.0075683 ± 0.0062881 | 7.3361534 ± 0.2299757 |
| 23F04482         | 21.2 % | 0.0253042 ± 0.0010500 | 0.0519055 ± 0.0090544 | 0.0097039 ± 0.0065114 | 0.0087788 ± 0.0062881 | 7.3719251 ± 0.2299757 |
| 23F04484         | 23.5 % | 0.0255845 ± 0.0010500 | 0.0603952 ± 0.0090544 | 0.0054296 ± 0.0065114 | 0.0125440 ± 0.0062881 | 7.4826369 ± 0.2299757 |

| Intercept<br>Values |        | 36Ar ± 1σ (SE)<br>[fA] | r2     | Regression<br>(type,n) | 37Ar ± 1σ (SE)<br>[fA] | r2     | Regression<br>(type,n) | 38Ar ± 1σ (SE)<br>[fA] | r2     | Regression<br>(type,n) | 39Ar ± 1σ (SE)<br>[fA] | r2     | Regression<br>(type,n) | 40Ar ± 1σ (SE)<br>[fA] | r2     | Regression<br>(type,n) |
|---------------------|--------|------------------------|--------|------------------------|------------------------|--------|------------------------|------------------------|--------|------------------------|------------------------|--------|------------------------|------------------------|--------|------------------------|
| 23F04441            | 0.7 %  | 0.0831048 ± 0.0004279  | 0.3947 | EXP 150 of 150         | 0.240117 ± 0.005566    | 0.0000 | EXP 148 of 150         | 0.0138861 ± 0.0063801  | 0.0022 | EXP 148 of 150         | 0.0209986 ± 0.0057699  | 0.6568 | EXP 149 of 150         | 25.203890 ± 0.016303   | 0.9900 | EXP 150 of 150         |
| 23F04443            | 0.9 %  | 0.0489091 ± 0.0003325  | 0.0484 | EXP 147 of 150         | 0.112252 ± 0.006384    | 0.0319 | EXP 150 of 150         | 0.0126239 ± 0.0060138  | 0.0040 | EXP 150 of 150         | 0.0193135 ± 0.0063600  | 0.5164 | EXP 150 of 150         | 14.515344 ± 0.016276   | 0.9956 | EXP 150 of 150         |
| 23F04445            | 1.2 %  | 0.0971930 ± 0.0004537  | 0.5639 | EXP 150 of 150         | 0.685097 ± 0.006485    | 0.4052 | EXP 150 of 150         | 0.0186072 ± 0.0062814  | 0.0019 | EXP 149 of 150         | 0.0752380 ± 0.0059059  | 0.5672 | EXP 148 of 150         | 29.991989 ± 0.017797   | 0.9242 | EXP 150 of 150         |
| 23F04446            | 1.8 %  | 0.2952083 ± 0.0007209  | 0.9446 | EXP 150 of 150         | 9.203630 ± 0.007460    | 0.9947 | EXP 150 of 150         | 0.0725665 ± 0.0063131  | 0.0075 | EXP 150 of 150         | 0.6524525 ± 0.0061511  | 0.0778 | EXP 150 of 150         | 91.101760 ± 0.021737   | 0.9986 | EXP 149 of 150         |
| 23F04447            | 2.3 %  | 0.2144307 ± 0.0006601  | 0.9018 | EXP 150 of 150         | 18.619339 ± 0.008226   | 0.9984 | EXP 150 of 150         | 0.0668661 ± 0.0067269  | 0.0109 | EXP 150 of 150         | 1.2002370 ± 0.0069321  | 0.4624 | EXP 150 of 150         | 65.721495 ± 0.020440   | 0.9954 | EXP 149 of 150         |
| 23F04449            | 2.8 %  | 0.1860909 ± 0.0006416  | 0.8521 | EXP 150 of 150         | 30.767417 ± 0.009534   | 0.9992 | EXP 150 of 150         | 0.0612995 ± 0.0060705  | 0.0074 | EXP 147 of 150         | 1.9267114 ± 0.0065275  | 0.8467 | EXP 145 of 150         | 58.526800 ± 0.022647   | 0.9900 | EXP 150 of 150         |
| 23F04450            | 3.4 %  | 0.2195169 ± 0.0007149  | 0.8873 | EXP 150 of 150         | 68.626785 ± 0.012594   | 0.9997 | EXP 150 of 150         | 0.0941242 ± 0.0063578  | 0.0391 | EXP 149 of 150         | 4.1919835 ± 0.0074510  | 0.9721 | EXP 150 of 150         | 69.539194 ± 0.018198   | 0.9968 | EXP 150 of 150         |
| 23F04452            | 4.0 %  | 0.3270679 ± 0.0008801  | 0.9336 | EXP 150 of 150         | 162.118409 ± 0.019671  | 0.9999 | EXP 147 of 150         | 0.1673722 ± 0.0063009  | 0.0559 | EXP 149 of 150         | 9.7884242 ± 0.0078560  | 0.9952 | EXP 150 of 150         | 105.789280 ± 0.018659  | 0.9993 | EXP 150 of 150         |
| 23F04453            | 4.7 %  | 0.3530943 ± 0.0007901  | 0.9552 | EXP 147 of 150         | 186.658367 ± 0.023262  | 0.9999 | EXP 150 of 150         | 0.1868378 ± 0.0065149  | 0.0896 | EXP 150 of 150         | 11.3057097 ± 0.0076863 | 0.9966 | EXP 150 of 150         | 115.426748 ± 0.021457  | 0.9993 | EXP 150 of 150         |
| 23F04454            | 5.3 %  | 0.4000624 ± 0.0009341  | 0.9534 | EXP 150 of 150         | 180.679028 ± 0.022333  | 0.9999 | EXP 150 of 150         | 0.1943475 ± 0.0057983  | 0.1256 | EXP 148 of 150         | 11.0386271 ± 0.0084311 | 0.9958 | EXP 150 of 150         | 128.079081 ± 0.024534  | 0.9993 | EXP 148 of 150         |
| 23F04456            | 6.0 %  | 0.4527826 ± 0.0009712  | 0.9622 | EXP 150 of 150         | 218.632018 ± 0.022132  | 0.9999 | EXP 149 of 150         | 0.2298972 ± 0.0056158  | 0.1435 | EXP 148 of 150         | 13.3915619 ± 0.0082333 | 0.9973 | EXP 150 of 150         | 147.666879 ± 0.023144  | 0.9996 | EXP 148 of 150         |
| 23F04457            | 6.8 %  | 0.5040447 ± 0.0010133  | 0.9679 | EXP 150 of 150         | 216.719744 ± 0.021749  | 0.9999 | EXP 150 of 150         | 0.2474636 ± 0.0066250  | 0.1912 | EXP 149 of 150         | 13.3716263 ± 0.0075097 | 0.9977 | EXP 150 of 150         | 162.904544 ± 0.020032  | 0.9998 | EXP 148 of 150         |
| 23F04458            | 7.5 %  | 0.4909677 ± 0.0009364  | 0.9713 | EXP 149 of 150         | 196.427837 ± 0.020278  | 0.9999 | EXP 150 of 150         | 0.2247067 ± 0.0067478  | 0.1533 | EXP 150 of 150         | 12.1996658 ± 0.0081101 | 0.9968 | EXP 150 of 150         | 158.396834 ± 0.022721  | 0.9997 | EXP 150 of 150         |
| 23F04460            | 8.3 %  | 0.5520809 ± 0.0010859  | 0.9698 | EXP 150 of 150         | 210.574852 ± 0.020897  | 0.9999 | EXP 150 of 150         | 0.2405123 ± 0.0065566  | 0.1812 | EXP 149 of 150         | 13.1536444 ± 0.0073359 | 0.9978 | EXP 148 of 150         | 179.129378 ± 0.024336  | 0.9997 | EXP 150 of 150         |
| 23F04461            | 9.1 %  | 0.5726752 ± 0.0012342  | 0.9650 | EXP 150 of 150         | 167.618392 ± 0.018283  | 0.9999 | EXP 150 of 150         | 0.2196788 ± 0.0066689  | 0.1066 | EXP 150 of 150         | 10.5394641 ± 0.0081390 | 0.9955 | EXP 150 of 150         | 181.970163 ± 0.026019  | 0.9997 | EXP 150 of 150         |
| 23F04462            | 9.8 %  | 0.5269064 ± 0.0011112  | 0.9673 | EXP 150 of 150         | 125.987956 ± 0.014947  | 0.9999 | EXP 148 of 150         | 0.1878336 ± 0.0062808  | 0.0913 | EXP 150 of 150         | 8.0057991 ± 0.0076835  | 0.9929 | EXP 150 of 150         | 166.481131 ± 0.021696  | 0.9998 | EXP 150 of 150         |
| 23F04464            | 10.5 % | 0.3694797 ± 0.0008749  | 0.9568 | EXP 148 of 150         | 87.168634 ± 0.014087   | 0.9998 | EXP 150 of 150         | 0.1289910 ± 0.0064955  | 0.0497 | EXP 150 of 150         | 5.5263397 ± 0.0066345  | 0.9884 | EXP 149 of 150         | 117.098359 ± 0.022252  | 0.9994 | EXP 150 of 150         |
| 23F04465            | 11.0 % | 0.4392331 ± 0.0009253  | 0.9657 | EXP 149 of 150         | 55.196239 ± 0.012316   | 0.9996 | EXP 150 of 150         | 0.1342768 ± 0.0060535  | 0.0726 | EXP 149 of 150         | 3.5175309 ± 0.0065576  | 0.9667 | EXP 150 of 150         | 135.240031 ± 0.025252  | 0.9995 | EXP 150 of 150         |
| 23F04466            | 11.5 % | 0.3526399 ± 0.0009084  | 0.9492 | EXP 149 of 150         | 34.740179 ± 0.009658   | 0.9994 | EXP 149 of 150         | 0.0936462 ± 0.0067416  | 0.0141 | EXP 150 of 150         | 2.2126557 ± 0.0067557  | 0.8910 | EXP 149 of 150         | 108.044410 ± 0.019101  | 0.9995 | EXP 148 of 150         |
| 23F04468            | 12.0 % | 0.3273296 ± 0.0007635  | 0.9564 | EXP 150 of 150         | 33.217166 ± 0.009816   | 0.9993 | EXP 150 of 150         | 0.0790402 ± 0.0066416  | 0.0036 | EXP 150 of 150         | 2.1349191 ± 0.0063360  | 0.8994 | EXP 150 of 150         | 101.569641 ± 0.018436  | 0.9994 | EXP 149 of 150         |
| 23F04469            | 12.5 % | 0.3501797 ± 0.0007931  | 0.9600 | EXP 150 of 150         | 26.658954 ± 0.007906   | 0.9993 | EXP 147 of 150         | 0.0947350 ± 0.0063664  | 0.0558 | EXP 147 of 150         | 1.6922385 ± 0.0054902  | 0.8508 | EXP 148 of 150         | 105.990364 ± 0.020119  | 0.9994 | EXP 149 of 150         |
| 23F04470            | 13.0 % | 0.3023463 ± 0.0008099  | 0.9424 | EXP 150 of 150         | 22.310360 ± 0.008272   | 0.9989 | EXP 149 of 150         | 0.0737691 ± 0.0063384  | 0.0228 | EXP 150 of 150         | 1.4054603 ± 0.0069277  | 0.6445 | EXP 150 of 150         | 91.933303 ± 0.019373   | 0.9991 | EXP 150 of 150         |
| 23F04472            | 13.5 % | 0.3324225 ± 0.0007842  | 0.9560 | EXP 149 of 150         | 26.269727 ± 0.010046   | 0.9988 | EXP 150 of 150         | 0.0879963 ± 0.0063782  | 0.0166 | EXP 149 of 150         | 1.6601223 ± 0.0066426  | 0.7872 | EXP 150 of 150         | 100.683121 ± 0.019023  | 0.9994 | EXP 148 of 150         |
| 23F04473            | 14.5 % | 0.3542715 ± 0.0008057  | 0.9601 | EXP 148 of 150         | 31.376338 ± 0.009754   | 0.9992 | EXP 150 of 150         | 0.0978986 ± 0.0062564  | 0.0307 | EXP 148 of 150         | 2.0507629 ± 0.0067287  | 0.8831 | EXP 146 of 150         | 108.518723 ± 0.020580  | 0.9994 | EXP 148 of 150         |
| 23F04474            | 15.0 % | 0.4839271 ± 0.0010772  | 0.9638 | EXP 150 of 150         | 73.525491 ± 0.012903   | 0.9998 | EXP 150 of 150         | 0.1485153 ± 0.0061440  | 0.0984 | EXP 148 of 150         | 4.7176682 ± 0.0068054  | 0.9819 | EXP 150 of 150         | 152.166233 ± 0.021303  | 0.9997 | EXP 150 of 150         |
| 23F04476            | 15.6 % | 1.0911387 ± 0.0014131  | 0.9892 | EXP 147 of 150         | 250.129873 ± 0.021753  | 0.9999 | EXP 150 of 150         | 0.3753227 ± 0.0072770  | 0.2763 | EXP 150 of 150         | 15.7933250 ± 0.0080070 | 0.9982 | EXP 150 of 150         | 349.910240 ± 0.032348  | 0.9999 | EXP 149 of 150         |
| 23F04477            | 16.2 % | 0.7689663 ± 0.0012258  | 0.9830 | EXP 150 of 150         | 87.840219 ± 0.013126   | 0.9998 | EXP 150 of 150         | 0.1926605 ± 0.0070193  | 0.0626 | EXP 150 of 150         | 5.2982722 ± 0.0067552  | 0.9858 | EXP 150 of 150         | 237.010918 ± 0.023056  | 0.9999 | EXP 147 of 150         |
| 23F04478            | 17.0 % | 0.6315201 ± 0.0011360  | 0.9770 | EXP 150 of 150         | 71.421615 ± 0.011081   | 0.9998 | EXP 149 of 150         | 0.1677346 ± 0.0066380  | 0.0858 | EXP 150 of 150         | 4.2254455 ± 0.0066765  | 0.9770 | EXP 150 of 150         | 196.364375 ± 0.024191  | 0.9998 | EXP 149 of 150         |
| 23F04480            | 17.9 % | 0.6311482 ± 0.0011813  | 0.9760 | EXP 150 of 150         | 84.825043 ± 0.012579   | 0.9998 | EXP 148 of 150         | 0.1760669 ± 0.0063481  | 0.1029 | EXP 149 of 150         | 5.0502437 ± 0.0068884  | 0.9836 | EXP 149 of 150         | 200.123598 ± 0.023222  | 0.9998 | EXP 150 of 150         |
| 23F04481            | 19.0 % | 0.2494949 ± 0.0007314  | 0.9222 | EXP 150 of 150         | 69.314056 ± 0.011698   | 0.9998 | EXP 150 of 150         | 0.0884316 ± 0.0069833  | 0.0195 | EXP 149 of 150         | 4.0579109 ± 0.0066144  | 0.9770 | EXP 150 of 150         | 80.672342 ± 0.019222   | 0.9986 | EXP 150 of 150         |
| 23F04482            | 21.2 % | 0.7254585 ± 0.0013470  | 0.9768 | EXP 150 of 150         | 85.432773 ± 0.014434   | 0.9998 | EXP 150 of 150         | 0.1819566 ± 0.0062049  | 0.0553 | EXP 148 of 150         | 4.9951275 ± 0.0072759  | 0.9808 | EXP 150 of 150         | 229.249223 ± 0.025209  | 0.9999 | EXP 150 of 150         |
| 23F04484            | 23.5 % | 0.2044793 ± 0.0007158  | 0.8664 | EXP 149 of 150         | 63.351835 ± 0.011950   | 0.9997 | EXP 150 of 150         | 0.0762674 ± 0.0070891  | 0.0124 | EXP 150 of 150         | 3.7048637 ± 0.0061005  | 0.9763 | EXP 148 of 150         | 65.516491 ± 0.020457   | 0.9965 | EXP 150 of 150         |

| Sample<br>Parameters |        | Sample    | Material    | Location     | Standard<br>Name | Standard<br>(in Ma) | %1σ   | Standard<br>Reference | Standard<br>40Ar/39Ar | %1σ   | J          | %1σ   | Air       | %1σ   | MDF<br>(lin) | %1σ   | Volume<br>Ratio | Sensitivity<br>(mol/volt) | Day | Month | Year | Hour | Min | Resist | Analyst     | Project             | Experiment | Nmb |
|----------------------|--------|-----------|-------------|--------------|------------------|---------------------|-------|-----------------------|-----------------------|-------|------------|-------|-----------|-------|--------------|-------|-----------------|---------------------------|-----|-------|------|------|-----|--------|-------------|---------------------|------------|-----|
|                      |        |           |             |              |                  |                     |       |                       |                       |       |            |       | 40Ar/36Ar |       |              |       |                 |                           |     |       |      |      |     |        |             |                     |            |     |
| 23F04441             | 0.7 %  | MM-CRB-32 | Plagioclase | Hells Canyon | FCT-NM (5D10-22) | 28.201              | 0.082 | Kuiper et al. 2008    | 9.31638               | 0.126 | 0.00166647 | 0.126 | 303.34    | 0.156 | 0.9960554    | 0.046 | 1               | 3.54E-14                  | 20  | FEB   | 2023 | 8    | 38  | 1      | Dan Miggins | Oregon\Mass (22-34) | 23F04438   | 01  |
| 23F04443             | 0.9 %  | MM-CRB-32 | Plagioclase | Hells Canyon | FCT-NM (5D10-22) | 28.201              | 0.082 | Kuiper et al. 2008    | 9.31638               | 0.126 | 0.00166647 | 0.126 | 303.34    | 0.156 | 0.9960554    | 0.046 | 1               | 3.54E-14                  | 20  | FEB   | 2023 | 9    | 5   | 1      | Dan Miggins | Oregon\Mass (22-34) | 23F04438   | 01  |
| 23F04445             | 1.2 %  | MM-CRB-32 | Plagioclase | Hells Canyon | FCT-NM (5D10-22) | 28.201              | 0.082 | Kuiper et al. 2008    | 9.31638               | 0.126 | 0.00166647 | 0.126 | 303.34    | 0.156 | 0.9960554    | 0.046 | 1               | 3.54E-14                  | 20  | FEB   | 2023 | 9    | 31  | 1      | Dan Miggins | Oregon\Mass (22-34) | 23F04438   | 01  |
| 23F04446             | 1.8 %  | MM-CRB-32 | Plagioclase | Hells Canyon | FCT-NM (5D10-22) | 28.201              | 0.082 | Kuiper et al. 2008    | 9.31638               | 0.126 | 0.00166647 | 0.126 | 303.34    | 0.156 | 0.9960554    | 0.046 | 1               | 3.54E-14                  | 20  | FEB   | 2023 | 9    | 44  | 1      | Dan Miggins | Oregon\Mass (22-34) | 23F04438   | 01  |
| 23F04447             | 2.3 %  | MM-CRB-32 | Plagioclase | Hells Canyon | FCT-NM (5D10-22) | 28.201              | 0.082 | Kuiper et al. 2008    | 9.31638               | 0.126 | 0.00166647 | 0.126 | 303.34    | 0.156 | 0.9960554    | 0.046 | 1               | 3.54E-14                  | 20  | FEB   | 2023 | 9    | 57  | 1      | Dan Miggins | Oregon\Mass (22-34) | 23F04438   | 01  |
| 23F04449             | 2.8 %  | MM-CRB-32 | Plagioclase | Hells Canyon | FCT-NM (5D10-22) | 28.201              | 0.082 | Kuiper et al. 2008    | 9.31638               | 0.126 | 0.00166647 | 0.126 | 303.34    | 0.156 | 0.9960554    | 0.046 | 1               | 3.54E-14                  | 20  | FEB   | 2023 | 10   | 23  | 1      | Dan Miggins | Oregon\Mass (22-34) | 23F04438   | 01  |
| 23F04450             | 3.4 %  | MM-CRB-32 | Plagioclase | Hells Canyon | FCT-NM (5D10-22) | 28.201              | 0.082 | Kuiper et al. 2008    | 9.31638               | 0.126 | 0.00166647 | 0.126 | 303.34    | 0.156 | 0.9960554    | 0.046 | 1               | 3.54E-14                  | 20  | FEB   | 2023 | 10   | 37  | 1      | Dan Miggins | Oregon\Mass (22-34) | 23F04438   | 01  |
| 23F04452             | 4.0 %  | MM-CRB-32 | Plagioclase | Hells Canyon | FCT-NM (5D10-22) | 28.201              | 0.082 | Kuiper et al. 2008    | 9.31638               | 0.126 | 0.00166647 | 0.126 | 303.34    | 0.156 | 0.9960554    | 0.046 | 1               | 3.54E-14                  | 20  | FEB   | 2023 | 11   | 3   | 1      | Dan Miggins | Oregon\Mass (22-34) | 23F04438   | 01  |
| 23F04453             | 4.7 %  | MM-CRB-32 | Plagioclase | Hells Canyon | FCT-NM (5D10-22) | 28.201              | 0.082 | Kuiper et al. 2008    | 9.31638               | 0.126 | 0.00166647 | 0.126 | 303.34    | 0.156 | 0.9960554    | 0.046 | 1               | 3.54E-14                  | 20  | FEB   | 2023 | 11   | 16  | 1      | Dan Miggins | Oregon\Mass (22-34) | 23F04438   | 01  |
| 23F04454             | 5.3 %  | MM-CRB-32 | Plagioclase | Hells Canyon | FCT-NM (5D10-22) | 28.201              | 0.082 | Kuiper et al. 2008    | 9.31638               | 0.126 | 0.00166647 | 0.126 | 303.34    | 0.156 | 0.9960554    | 0.046 | 1               | 3.54E-14                  | 20  | FEB   | 2023 | 11   | 29  | 1      | Dan Miggins | Oregon\Mass (22-34) | 23F04438   | 01  |
| 23F04456             | 6.0 %  | MM-CRB-32 | Plagioclase | Hells Canyon | FCT-NM (5D10-22) | 28.201              | 0.082 | Kuiper et al. 2008    | 9.31638               | 0.126 | 0.00166647 | 0.126 | 303.34    | 0.156 | 0.9960554    | 0.046 | 1               | 3.54E-14                  | 20  | FEB   | 2023 | 11   | 55  | 1      | Dan Miggins | Oregon\Mass (22-34) | 23F04438   | 01  |
| 23F04457             | 6.8 %  | MM-CRB-32 | Plagioclase | Hells Canyon | FCT-NM (5D10-22) | 28.201              | 0.082 | Kuiper et al. 2008    | 9.31638               | 0.126 | 0.00166647 | 0.126 | 303.34    | 0.156 | 0.9960554    | 0.046 | 1               | 3.54E-14                  | 20  | FEB   | 2023 | 12   | 9   | 1      | Dan Miggins | Oregon\Mass (22-34) | 23F04438   | 01  |
| 23F04458             | 7.5 %  | MM-CRB-32 | Plagioclase | Hells Canyon | FCT-NM (5D10-22) | 28.201              | 0.082 | Kuiper et al. 2008    | 9.31638               | 0.126 | 0.00166647 | 0.126 | 303.34    | 0.156 | 0.9960554    | 0.046 | 1               | 3.54E-14                  | 20  | FEB   | 2023 | 12   | 22  | 1      | Dan Miggins | Oregon\Mass (22-34) | 23F04438   | 01  |
| 23F04460             | 8.3 %  | MM-CRB-32 | Plagioclase | Hells Canyon | FCT-NM (5D10-22) | 28.201              | 0.082 | Kuiper et al. 2008    | 9.31638               | 0.126 | 0.00166647 | 0.126 | 303.34    | 0.156 | 0.9960554    | 0.046 | 1               | 3.54E-14                  | 20  | FEB   | 2023 | 12   | 48  | 1      | Dan Miggins | Oregon\Mass (22-34) | 23F04438   | 01  |
| 23F04461             | 9.1 %  | MM-CRB-32 | Plagioclase | Hells Canyon | FCT-NM (5D10-22) | 28.201              | 0.082 | Kuiper et al. 2008    | 9.31638               | 0.126 | 0.00166647 | 0.126 | 303.34    | 0.156 | 0.9960554    | 0.046 | 1               | 3.54E-14                  | 20  | FEB   | 2023 | 13   | 1   | 1      | Dan Miggins | Oregon\Mass (22-34) | 23F04438   | 01  |
| 23F04462             | 9.8 %  | MM-CRB-32 | Plagioclase | Hells Canyon | FCT-NM (5D10-22) | 28.201              | 0.082 | Kuiper et al. 2008    | 9.31638               | 0.126 | 0.00166647 | 0.126 | 303.34    | 0.156 | 0.9960554    | 0.046 | 1               | 3.54E-14                  | 20  | FEB   | 2023 | 13   | 14  | 1      | Dan Miggins | Oregon\Mass (22-34) | 23F04438   | 01  |
| 23F04464             | 10.5 % | MM-CRB-32 | Plagioclase | Hells Canyon | FCT-NM (5D10-22) | 28.201              | 0.082 | Kuiper et al. 2008    | 9.31638               | 0.126 | 0.00166647 | 0.126 | 303.34    | 0.156 | 0.9960554    | 0.046 | 1               | 3.54E-14                  | 20  | FEB   | 2023 | 13   | 40  | 1      | Dan Miggins | Oregon\Mass (22-34) | 23F04438   | 01  |
| 23F04465             | 11.0 % | MM-CRB-32 | Plagioclase | Hells Canyon | FCT-NM (5D10-22) | 28.201              | 0.082 | Kuiper et al. 2008    | 9.31638               | 0.126 | 0.00166647 | 0.126 | 303.34    | 0.156 | 0.9960554    | 0.046 | 1               | 3.54E-14                  | 20  | FEB   | 2023 | 13   | 54  | 1      | Dan Miggins | Oregon\Mass (22-34) | 23F04438   | 01  |
| 23F04466             | 11.5 % | MM-CRB-32 | Plagioclase | Hells Canyon | FCT-NM (5D10-22) | 28.201              | 0.082 | Kuiper et al. 2008    | 9.31638               | 0.126 | 0.00166647 | 0.126 | 303.34    | 0.156 | 0.9960554    | 0.046 | 1               | 3.54E-14                  | 20  | FEB   | 2023 | 14   | 7   | 1      | Dan Miggins | Oregon\Mass (22-34) | 23F04438   | 01  |
| 23F04468             | 12.0 % | MM-CRB-32 | Plagioclase | Hells Canyon | FCT-NM (5D10-22) | 28.201              | 0.082 | Kuiper et al. 2008    | 9.31638               | 0.126 | 0.00166647 | 0.126 | 303.34    | 0.156 | 0.9960554    | 0.046 | 1               | 3.54E-14                  | 20  | FEB   | 2023 | 14   | 33  | 1      | Dan Miggins | Oregon\Mass (22-34) | 23F04438   | 01  |
| 23F04469             | 12.5 % | MM-CRB-32 | Plagioclase | Hells Canyon | FCT-NM (5D10-22) | 28.201              | 0.082 | Kuiper et al. 2008    | 9.31638               | 0.126 | 0.00166647 | 0.126 | 303.34    | 0.156 | 0.9960554    | 0.046 | 1               | 3.54E-14                  | 20  | FEB   | 2023 | 14   | 46  | 1      | Dan Miggins | Oregon\Mass (22-34) | 23F04438   | 01  |
| 23F04470             | 13.0 % | MM-CRB-32 | Plagioclase | Hells Canyon | FCT-NM (5D10-22) | 28.201              | 0.082 | Kuiper et al. 2008    | 9.31638               | 0.126 | 0.00166647 | 0.126 | 303.34    | 0.156 | 0.9960554    | 0.046 | 1               | 3.54E-14                  | 20  | FEB   | 2023 | 14   | 59  | 1      | Dan Miggins | Oregon\Mass (22-34) | 23F04438   | 01  |
| 23F04472             | 13.5 % | MM-CRB-32 | Plagioclase | Hells Canyon | FCT-NM (5D10-22) | 28.201              | 0.082 | Kuiper et al. 2008    | 9.31638               | 0.126 | 0.00166647 | 0.126 | 303.34    | 0.156 | 0.9960554    | 0.046 | 1               | 3.54E-14                  | 20  | FEB   | 2023 | 15   | 27  | 1      | Dan Miggins | Oregon\Mass (22-34) | 23F04438   | 01  |
| 23F04473             | 14.5 % | MM-CRB-32 | Plagioclase | Hells Canyon | FCT-NM (5D10-22) | 28.201              | 0.082 | Kuiper et al. 2008    | 9.31638               | 0.126 | 0.00166647 | 0.126 | 303.34    | 0.156 | 0.9960554    | 0.046 | 1               | 3.54E-14                  | 20  | FEB   | 2023 | 15   | 41  | 1      | Dan Miggins | Oregon\Mass (22-34) | 23F04438   | 01  |
| 23F04474             | 15.0 % | MM-CRB-32 | Plagioclase | Hells Canyon | FCT-NM (5D10-22) | 28.201              | 0.082 | Kuiper et al. 2008    | 9.31638               | 0.126 | 0.00166647 | 0.126 | 303.34    | 0.156 | 0.9960554    | 0.046 | 1               | 3.54E-14                  | 20  | FEB   | 2023 | 15   | 54  | 1      | Dan Miggins | Oregon\Mass (22-34) | 23F04438   | 01  |
| 23F04476             | 15.6 % | MM-CRB-32 | Plagioclase | Hells Canyon | FCT-NM (5D10-22) | 28.201              | 0.082 | Kuiper et al. 2008    | 9.31638               | 0.126 | 0.00166647 | 0.126 | 303.34    | 0.156 | 0.9960554    | 0.046 | 1               | 3.54E-14                  | 20  | FEB   | 2023 | 16   | 20  | 1      | Dan Miggins | Oregon\Mass (22-34) | 23F04438   | 01  |
| 23F04477             | 16.2 % | MM-CRB-32 | Plagioclase | Hells Canyon | FCT-NM (5D10-22) | 28.201              | 0.082 | Kuiper et al. 2008    | 9.31638               | 0.126 | 0.00166647 | 0.126 | 303.34    | 0.156 | 0.9960554    | 0.046 | 1               | 3.54E-14                  | 20  | FEB   | 2023 | 16   | 33  | 1      | Dan Miggins | Oregon\Mass (22-34) | 23F04438   | 01  |
| 23F04478             | 17.0 % | MM-CRB-32 | Plagioclase | Hells Canyon | FCT-NM (5D10-22) | 28.201              | 0.082 | Kuiper et al. 2008    | 9.31638               | 0.126 | 0.00166647 | 0.126 | 303.34    | 0.156 | 0.9960554    | 0.046 | 1               | 3.54E-14                  | 20  | FEB   | 2023 | 16   | 46  | 1      | Dan Miggins | Oregon\Mass (22-34) | 23F04438   | 01  |
| 23F04480             | 17.9 % | MM-CRB-32 | Plagioclase | Hells Canyon | FCT-NM (5D10-22) | 28.201              | 0.082 | Kuiper et al. 2008    | 9.31638               | 0.126 | 0.00166647 | 0.126 | 303.34    | 0.156 | 0.9960554    | 0.046 | 1               | 3.54E-14                  | 20  | FEB   | 2023 | 17   | 13  | 1      | Dan Miggins | Oregon\Mass (22-34) | 23F04438   | 01  |
| 23F04481             | 19.0 % | MM-CRB-32 | Plagioclase | Hells Canyon | FCT-NM (5D10-22) | 28.201              | 0.082 | Kuiper et al. 2008    | 9.31638               | 0.126 | 0.00166647 | 0.126 | 303.34    | 0.156 | 0.9960554    | 0.046 | 1               | 3.54E-14                  | 20  | FEB   | 2023 | 17   | 26  | 1      | Dan Miggins | Oregon\Mass (22-34) | 23F04438   | 01  |
| 23F04482             | 21.2 % | MM-CRB-32 | Plagioclase | Hells Canyon | FCT-NM (5D10-22) | 28.201              | 0.082 | Kuiper et al. 2008    | 9.31638               | 0.126 | 0.00166647 | 0.126 | 303.34    | 0.156 | 0.9960554    | 0.046 | 1               | 3.54E-14                  | 20  | FEB   | 2023 | 17   | 39  | 1      | Dan Miggins | Oregon\Mass (22-34) | 23F04438   | 01  |
| 23F04484             | 23.5 % | MM-CRB-32 | Plagioclase | Hells Canyon | FCT-NM (5D10-22) | 28.201              | 0.082 | Kuiper et al. 2008    | 9.31638               | 0.126 | 0.00166647 | 0.126 | 303.34    | 0.156 | 0.9960554    | 0.046 | 1               | 3.54E-14                  | 20  | FEB   | 2023 | 18   | 5   | 1      | Dan Miggins | Oregon\Mass (22-34) | 23F04438   | 01  |

| Irradiation Constants |        | 40/36(a) |       | 40/36(c) |    | 38/36(a) |       | 38/36(c) |   | 39/37(ca) |      | 38/37(ca) |      | 36/37(ca) |      | 40/39(k) |      | 38/39(k) |      | 36/38(cl) |   | K/Ca |   | K/Cl |   | Ca/Cl |   | Irradiation | X-pos  | Y-pos  | Z/H-pos |
|-----------------------|--------|----------|-------|----------|----|----------|-------|----------|---|-----------|------|-----------|------|-----------|------|----------|------|----------|------|-----------|---|------|---|------|---|-------|---|-------------|--------|--------|---------|
|                       |        | %1σ      |       | %1σ      |    | %1σ      |       | %1σ      |   | %1σ       |      | %1σ       |      | %1σ       |      | %1σ      |      | %1σ      |      | %1σ       |   | %1σ  |   | %1σ  |   | %1σ   |   |             |        |        |         |
| 23F04441              | 0.7 %  | 298.56   | 0.104 | 0.018    | 35 | 0.1885   | 0.159 | 1.493    | 3 | 0.000643  | 0.92 | 0.00018   | 9.63 | 0.00027   | 0.17 | 0.000607 | 9.65 | 0.012077 | 0.09 | 0         | 0 | 0.43 | 0 | 0    | 0 | 0     | 0 | 22-OSU-05   | 999.00 | 999.00 | 17.39   |
| 23F04443              | 0.9 %  | 298.56   | 0.104 | 0.018    | 35 | 0.1885   | 0.159 | 1.493    | 3 | 0.000643  | 0.92 | 0.00018   | 9.63 | 0.00027   | 0.17 | 0.000607 | 9.65 | 0.012077 | 0.09 | 0         | 0 | 0.43 | 0 | 0    | 0 | 0     | 0 | 22-OSU-05   | 999.00 | 999.00 | 17.39   |
| 23F04445              | 1.2 %  | 298.56   | 0.104 | 0.018    | 35 | 0.1885   | 0.159 | 1.493    | 3 | 0.000643  | 0.92 | 0.00018   | 9.63 | 0.00027   | 0.17 | 0.000607 | 9.65 | 0.012077 | 0.09 | 0         | 0 | 0.43 | 0 | 0    | 0 | 0     | 0 | 22-OSU-05   | 999.00 | 999.00 | 17.39   |
| 23F04446              | 1.8 %  | 298.56   | 0.104 | 0.018    | 35 | 0.1885   | 0.159 | 1.493    | 3 | 0.000643  | 0.92 | 0.00018   | 9.63 | 0.00027   | 0.17 | 0.000607 | 9.65 | 0.012077 | 0.09 | 0         | 0 | 0.43 | 0 | 0    | 0 | 0     | 0 | 22-OSU-05   | 999.00 | 999.00 | 17.39   |
| 23F04447              | 2.3 %  | 298.56   | 0.104 | 0.018    | 35 | 0.1885   | 0.159 | 1.493    | 3 | 0.000643  | 0.92 | 0.00018   | 9.63 | 0.00027   | 0.17 | 0.000607 | 9.65 | 0.012077 | 0.09 | 0         | 0 | 0.43 | 0 | 0    | 0 | 0     | 0 | 22-OSU-05   | 999.00 | 999.00 | 17.39   |
| 23F04449              | 2.8 %  | 298.56   | 0.104 | 0.018    | 35 | 0.1885   | 0.159 | 1.493    | 3 | 0.000643  | 0.92 | 0.00018   | 9.63 | 0.00027   | 0.17 | 0.000607 | 9.65 | 0.012077 | 0.09 | 0         | 0 | 0.43 | 0 | 0    | 0 | 0     | 0 | 22-OSU-05   | 999.00 | 999.00 | 17.39   |
| 23F04450              | 3.4 %  | 298.56   | 0.104 | 0.018    | 35 | 0.1885   | 0.159 | 1.493    | 3 | 0.000643  | 0.92 | 0.00018   | 9.63 | 0.00027   | 0.17 | 0.000607 | 9.65 | 0.012077 | 0.09 | 0         | 0 | 0.43 | 0 | 0    | 0 | 0     | 0 | 22-OSU-05   | 999.00 | 999.00 | 17.39   |
| 23F04452              | 4.0 %  | 298.56   | 0.104 | 0.018    | 35 | 0.1885   | 0.159 | 1.493    | 3 | 0.000643  | 0.92 | 0.00018   | 9.63 | 0.00027   | 0.17 | 0.000607 | 9.65 | 0.012077 | 0.09 | 0         | 0 | 0.43 | 0 | 0    | 0 | 0     | 0 | 22-OSU-05   | 999.00 | 999.00 | 17.39   |
| 23F04453              | 4.7 %  | 298.56   | 0.104 | 0.018    | 35 | 0.1885   | 0.159 | 1.493    | 3 | 0.000643  | 0.92 | 0.00018   | 9.63 | 0.00027   | 0.17 | 0.000607 | 9.65 | 0.012077 | 0.09 | 0         | 0 | 0.43 | 0 | 0    | 0 | 0     | 0 | 22-OSU-05   | 999.00 | 999.00 | 17.39   |
| 23F04454              | 5.3 %  | 298.56   | 0.104 | 0.018    | 35 | 0.1885   | 0.159 | 1.493    | 3 | 0.000643  | 0.92 | 0.00018   | 9.63 | 0.00027   | 0.17 | 0.000607 | 9.65 | 0.012077 | 0.09 | 0         | 0 | 0.43 | 0 | 0    | 0 | 0     | 0 | 22-OSU-05   | 999.00 | 999.00 | 17.39   |
| 23F04456              | 6.0 %  | 298.56   | 0.104 | 0.018    | 35 | 0.1885   | 0.159 | 1.493    | 3 | 0.000643  | 0.92 | 0.00018   | 9.63 | 0.00027   | 0.17 | 0.000607 | 9.65 | 0.012077 | 0.09 | 0         | 0 | 0.43 | 0 | 0    | 0 | 0     | 0 | 22-OSU-05   | 999.00 | 999.00 | 17.39   |
| 23F04457              | 6.8 %  | 298.56   | 0.104 | 0.018    | 35 | 0.1885   | 0.159 | 1.493    | 3 | 0.000643  | 0.92 | 0.00018   | 9.63 | 0.00027   | 0.17 | 0.000607 | 9.65 | 0.012077 | 0.09 | 0         | 0 | 0.43 | 0 | 0    | 0 | 0     | 0 | 22-OSU-05   | 999.00 | 999.00 | 17.39   |
| 23F04458              | 7.5 %  | 298.56   | 0.104 | 0.018    | 35 | 0.1885   | 0.159 | 1.493    | 3 | 0.000643  | 0.92 | 0.00018   | 9.63 | 0.00027   | 0.17 | 0.000607 | 9.65 | 0.012077 | 0.09 | 0         | 0 | 0.43 | 0 | 0    | 0 | 0     | 0 | 22-OSU-05   | 999.00 | 999.00 | 17.39   |
| 23F04460              | 8.3 %  | 298.56   | 0.104 | 0.018    | 35 | 0.1885   | 0.159 | 1.493    | 3 | 0.000643  | 0.92 | 0.00018   | 9.63 | 0.00027   | 0.17 | 0.000607 | 9.65 | 0.012077 | 0.09 | 0         | 0 | 0.43 | 0 | 0    | 0 | 0     | 0 | 22-OSU-05   | 999.00 | 999.00 | 17.39   |
| 23F04461              | 9.1 %  | 298.56   | 0.104 | 0.018    | 35 | 0.1885   | 0.159 | 1.493    | 3 | 0.000643  | 0.92 | 0.00018   | 9.63 | 0.00027   | 0.17 | 0.000607 | 9.65 | 0.012077 | 0.09 | 0         | 0 | 0.43 | 0 | 0    | 0 | 0     | 0 | 22-OSU-05   | 999.00 | 999.00 | 17.39   |
| 23F04462              | 9.8 %  | 298.56   | 0.104 | 0.018    | 35 | 0.1885   | 0.159 | 1.493    | 3 | 0.000643  | 0.92 | 0.00018   | 9.63 | 0.00027   | 0.17 | 0.000607 | 9.65 | 0.012077 | 0.09 | 0         | 0 | 0.43 | 0 | 0    | 0 | 0     | 0 | 22-OSU-05   | 999.00 | 999.00 | 17.39   |
| 23F04464              | 10.5 % | 298.56   | 0.104 | 0.018    | 35 | 0.1885   | 0.159 | 1.493    | 3 | 0.000643  | 0.92 | 0.00018   | 9.63 | 0.00027   | 0.17 | 0.000607 | 9.65 | 0.012077 | 0.09 | 0         | 0 | 0.43 | 0 | 0    | 0 | 0     | 0 | 22-OSU-05   | 999.00 | 999.00 | 17.39   |
| 23F04465              | 11.0 % | 298.56   | 0.104 | 0.018    | 35 | 0.1885   | 0.159 | 1.493    | 3 | 0.000643  | 0.92 | 0.00018   | 9.63 | 0.00027   | 0.17 | 0.000607 | 9.65 | 0.012077 | 0.09 | 0         | 0 | 0.43 | 0 | 0    | 0 | 0     | 0 | 22-OSU-05   | 999.00 | 999.00 | 17.39   |
| 23F04466              | 11.5 % | 298.56   | 0.104 | 0.018    | 35 | 0.1885   | 0.159 | 1.493    | 3 | 0.000643  | 0.92 | 0.00018   | 9.63 | 0.00027   | 0.17 | 0.000607 | 9.65 | 0.012077 | 0.09 | 0         | 0 | 0.43 | 0 | 0    | 0 | 0     | 0 | 22-OSU-05   | 999.00 | 999.00 | 17.39   |
| 23F04468              | 12.0 % | 298.56   | 0.104 | 0.018    | 35 | 0.1885   | 0.159 | 1.493    | 3 | 0.000643  | 0.92 | 0.00018   | 9.63 | 0.00027   | 0.17 | 0.000607 | 9.65 | 0.012077 | 0.09 | 0         | 0 | 0.43 | 0 | 0    | 0 | 0     | 0 | 22-OSU-05   | 999.00 | 999.00 | 17.39   |
| 23F04469              | 12.5 % | 298.56   | 0.104 | 0.018    | 35 | 0.1885   | 0.159 | 1.493    | 3 | 0.000643  | 0.92 | 0.00018   | 9.63 | 0.00027   | 0.17 | 0.000607 | 9.65 | 0.012077 | 0.09 | 0         | 0 | 0.43 | 0 | 0    | 0 | 0     | 0 | 22-OSU-05   | 999.00 | 999.00 | 17.39   |
| 23F04470              | 13.0 % | 298.56   | 0.104 | 0.018    | 35 | 0.1885   | 0.159 | 1.493    | 3 | 0.000643  | 0.92 | 0.00018   | 9.63 | 0.00027   | 0.17 | 0.000607 | 9.65 | 0.012077 | 0.09 | 0         | 0 | 0.43 | 0 | 0    | 0 | 0     | 0 | 22-OSU-05   | 999.00 | 999.00 | 17.39   |
| 23F04472              | 13.5 % | 298.56   | 0.104 | 0.018    | 35 | 0.1885   | 0.159 | 1.493    | 3 | 0.000643  | 0.92 | 0.00018   | 9.63 | 0.00027   | 0.17 | 0.000607 | 9.65 | 0.012077 | 0.09 | 0         | 0 | 0.43 | 0 | 0    | 0 | 0     | 0 | 22-OSU-05   | 999.00 | 999.00 | 17.39   |
| 23F04473              | 14.5 % | 298.56   | 0.104 | 0.018    | 35 | 0.1885   | 0.159 | 1.493    | 3 | 0.000643  | 0.92 | 0.00018   | 9.63 | 0.00027   | 0.17 | 0.000607 | 9.65 | 0.012077 | 0.09 | 0         | 0 | 0.43 | 0 | 0    | 0 | 0     | 0 | 22-OSU-05   | 999.00 | 999.00 | 17.39   |
| 23F04474              | 15.0 % | 298.56   | 0.104 | 0.018    | 35 | 0.1885   | 0.159 | 1.493    | 3 | 0.000643  | 0.92 | 0.00018   | 9.63 | 0.00027   | 0.17 | 0.000607 | 9.65 | 0.012077 | 0.09 | 0         | 0 | 0.43 | 0 | 0    | 0 | 0     | 0 | 22-OSU-05   | 999.00 | 999.00 | 17.39   |
| 23F04476              | 15.6 % | 298.56   | 0.104 | 0.018    | 35 | 0.1885   | 0.159 | 1.493    | 3 | 0.000643  | 0.92 | 0.00018   | 9.63 | 0.00027   | 0.17 | 0.000607 | 9.65 | 0.012077 | 0.09 | 0         | 0 | 0.43 | 0 | 0    | 0 | 0     | 0 | 22-OSU-05   | 999.00 | 999.00 | 17.39   |
| 23F04477              | 16.2 % | 298.56   | 0.104 | 0.018    | 35 | 0.1885   | 0.159 | 1.493    | 3 | 0.000643  | 0.92 | 0.00018   | 9.63 | 0.00027   | 0.17 | 0.000607 | 9.65 | 0.012077 | 0.09 | 0         | 0 | 0.43 | 0 | 0    | 0 | 0     | 0 | 22-OSU-05   | 999.00 | 999.00 | 17.39   |
| 23F04478              | 17.0 % | 298.56   | 0.104 | 0.018    | 35 | 0.1885   | 0.159 | 1.493    | 3 | 0.000643  | 0.92 | 0.00018   | 9.63 | 0.00027   | 0.17 | 0.000607 | 9.65 | 0.012077 | 0.09 | 0         | 0 | 0.43 | 0 | 0    | 0 | 0     | 0 | 22-OSU-05   | 999.00 | 999.00 | 17.39   |
| 23F04480              | 17.9 % | 298.56   | 0.104 | 0.018    | 35 | 0.1885   | 0.159 | 1.493    | 3 | 0.000643  | 0.92 | 0.00018   | 9.63 | 0.00027   | 0.17 | 0.000607 | 9.65 | 0.012077 | 0.09 | 0         | 0 | 0.43 | 0 | 0    | 0 | 0     | 0 | 22-OSU-05   | 999.00 | 999.00 | 17.39   |
| 23F04481              | 19.0 % | 298.56   | 0.104 | 0.018    | 35 | 0.1885   | 0.159 | 1.493    | 3 | 0.000643  | 0.92 | 0.00018   | 9.63 | 0.00027   | 0.17 | 0.000607 | 9.65 | 0.012077 | 0.09 | 0         | 0 | 0.43 | 0 | 0    | 0 | 0     | 0 | 22-OSU-05   | 999.00 | 999.00 | 17.39   |
| 23F04482              | 21.2 % | 298.56   | 0.104 | 0.018    | 35 | 0.1885   | 0.159 | 1.493    | 3 | 0.000643  | 0.92 | 0.00018   | 9.63 | 0.00027   | 0.17 | 0.000607 | 9.65 | 0.012077 | 0.09 | 0         | 0 | 0.43 | 0 | 0    | 0 | 0     | 0 | 22-OSU-05   | 999.00 | 999.00 | 17.39   |
| 23F04484              | 23.5 % | 298.56   | 0.104 | 0.018    | 35 | 0.1885   | 0.159 | 1.493    | 3 | 0.000643  | 0.92 | 0.00018   | 9.63 | 0.00027   | 0.17 | 0.000607 | 9.65 | 0.012077 | 0.09 | 0         | 0 | 0.43 | 0 | 0    | 0 | 0     | 0 | 22-OSU-05   | 999.00 | 999.00 | 17.39   |

23F04438.AGE >>> MM-CRB-32 >>> OREGON | MASS (22-34) PROJECT

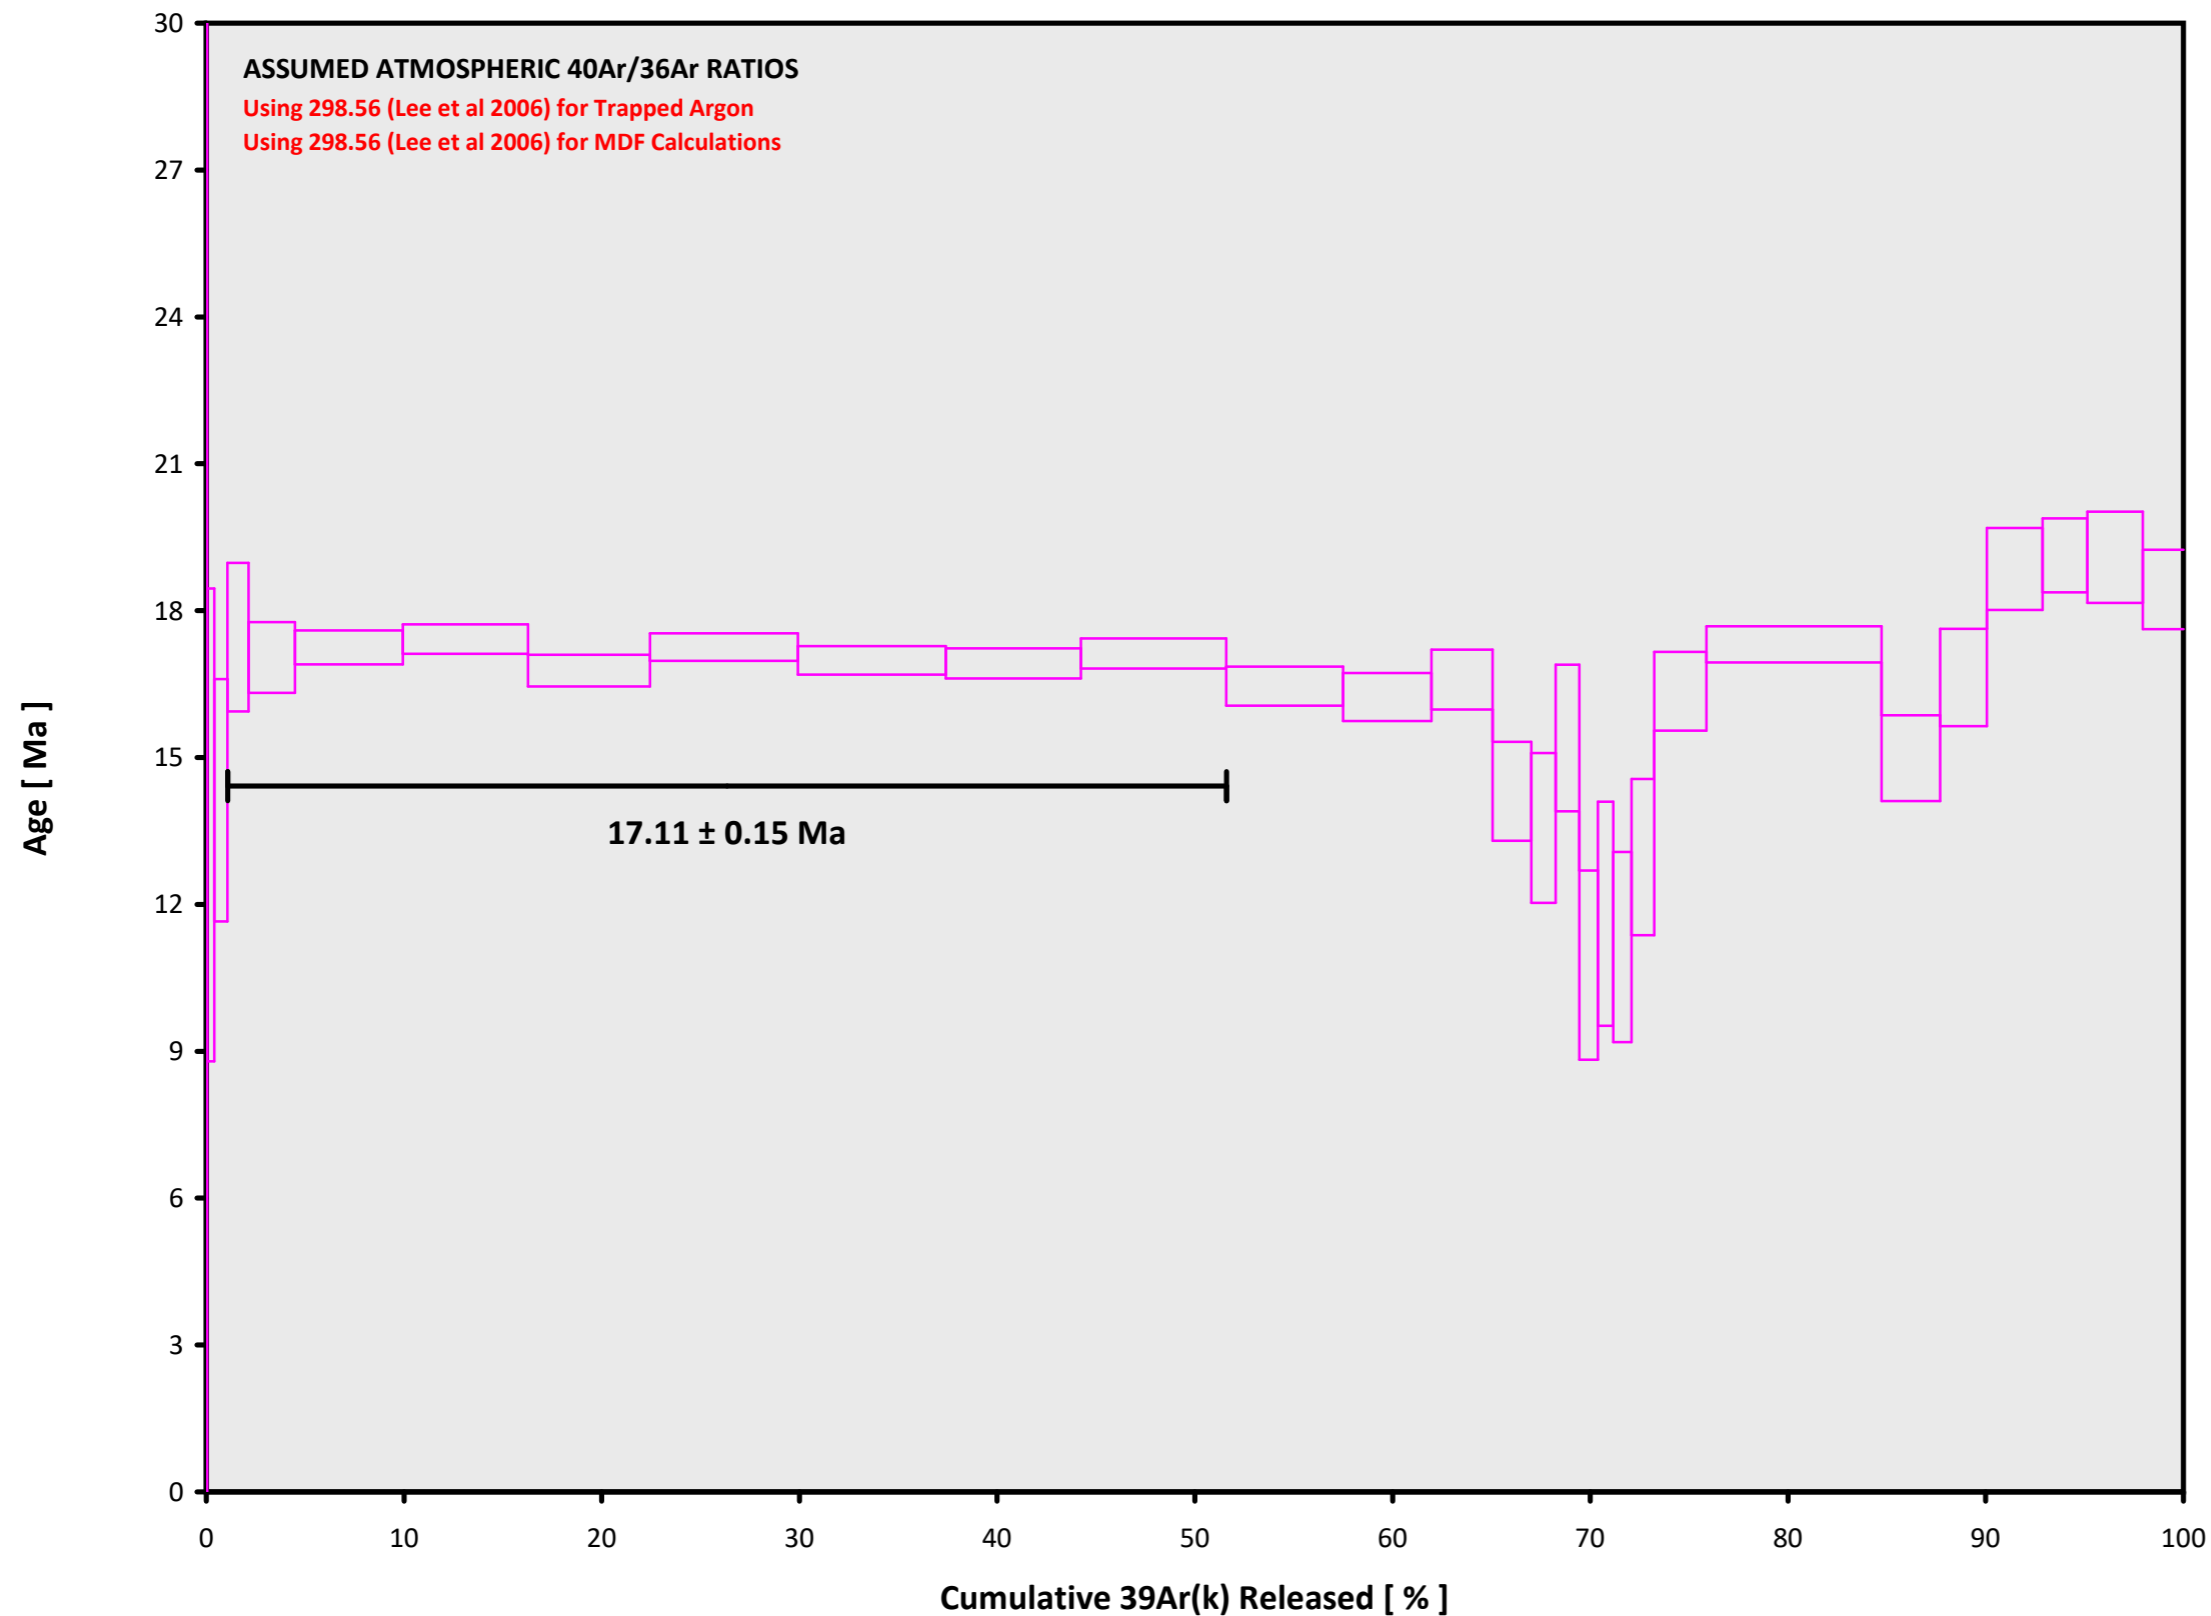

Ar-Ages in Ma

WEIGHTED PLATEAU

17.11 ± 0.15

TOTAL FUSION

16.76 ± 0.12

NORMAL ISOCHRON

17.32 ± 0.52

INVERSE ISOCHRON

17.32 ± 0.51

MSWD (PROBABILITY)

1.60 (12%)

TRAPPED  $^{40}\text{Ar}/^{36}\text{Ar}$  RATIO

Standard 40/36 = 298.56 ±  
0.104 %SD

Sample Info

Plagioclase  
Hells Canyon  
Dan Miggins

IRR = 22-OSU-05 (5D10-22)

J = 0.00166647 ± 0.00000210

23F04438.AGE >>> MM-CRB-32 >>> OREGON | MASS (22-34) PROJECT

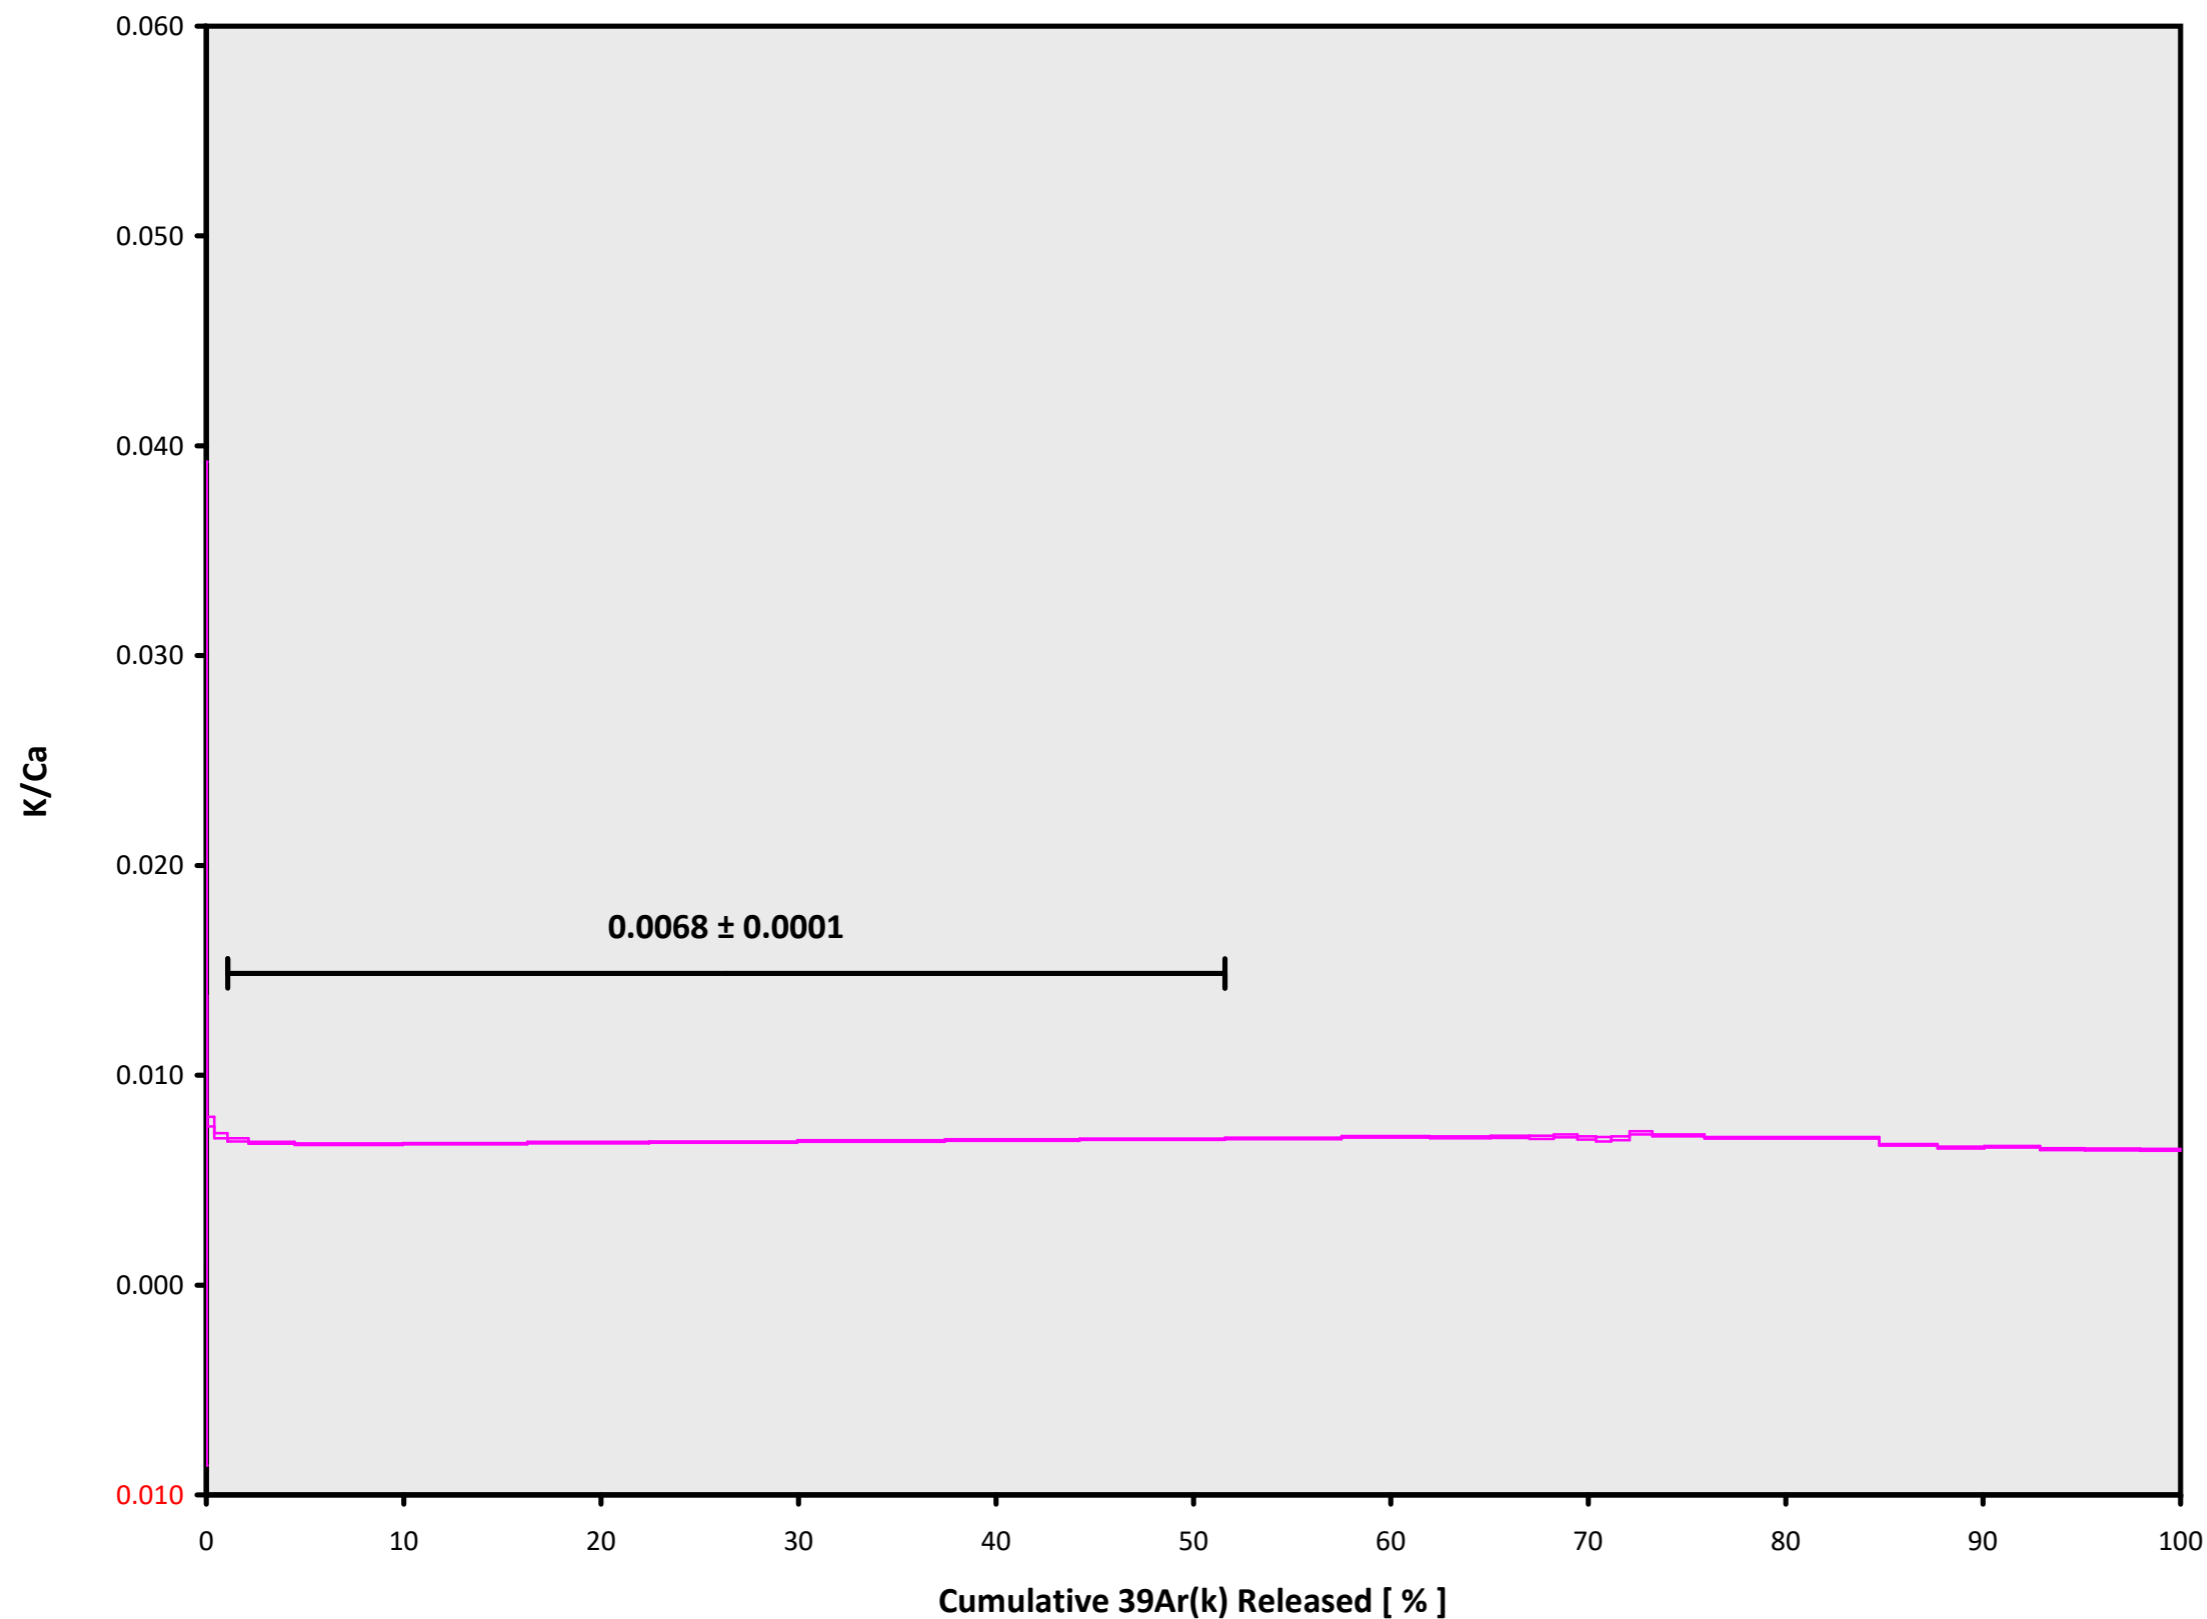

### Ar-Ages in Ma

#### WEIGHTED PLATEAU

17.11 ± 0.15

#### TOTAL FUSION

16.76 ± 0.12

#### NORMAL ISOCHRON

17.32 ± 0.52

#### INVERSE ISOCHRON

17.32 ± 0.51

#### TRAPPED $^{40}\text{Ar}/^{36}\text{Ar}$ RATIO

Standard  $^{40}/^{36} = 298.56 \pm 0.104$   
%SD

### Sample Info

Plagioclase  
Hells Canyon  
Dan Miggins

IRR = 22-OSU-05 (5D10-22)

J = 0.00166647 ± 0.00000210

23F04438.AGE >>> MM-CRB-32 >>> OREGON | MASS (22-34) PROJECT

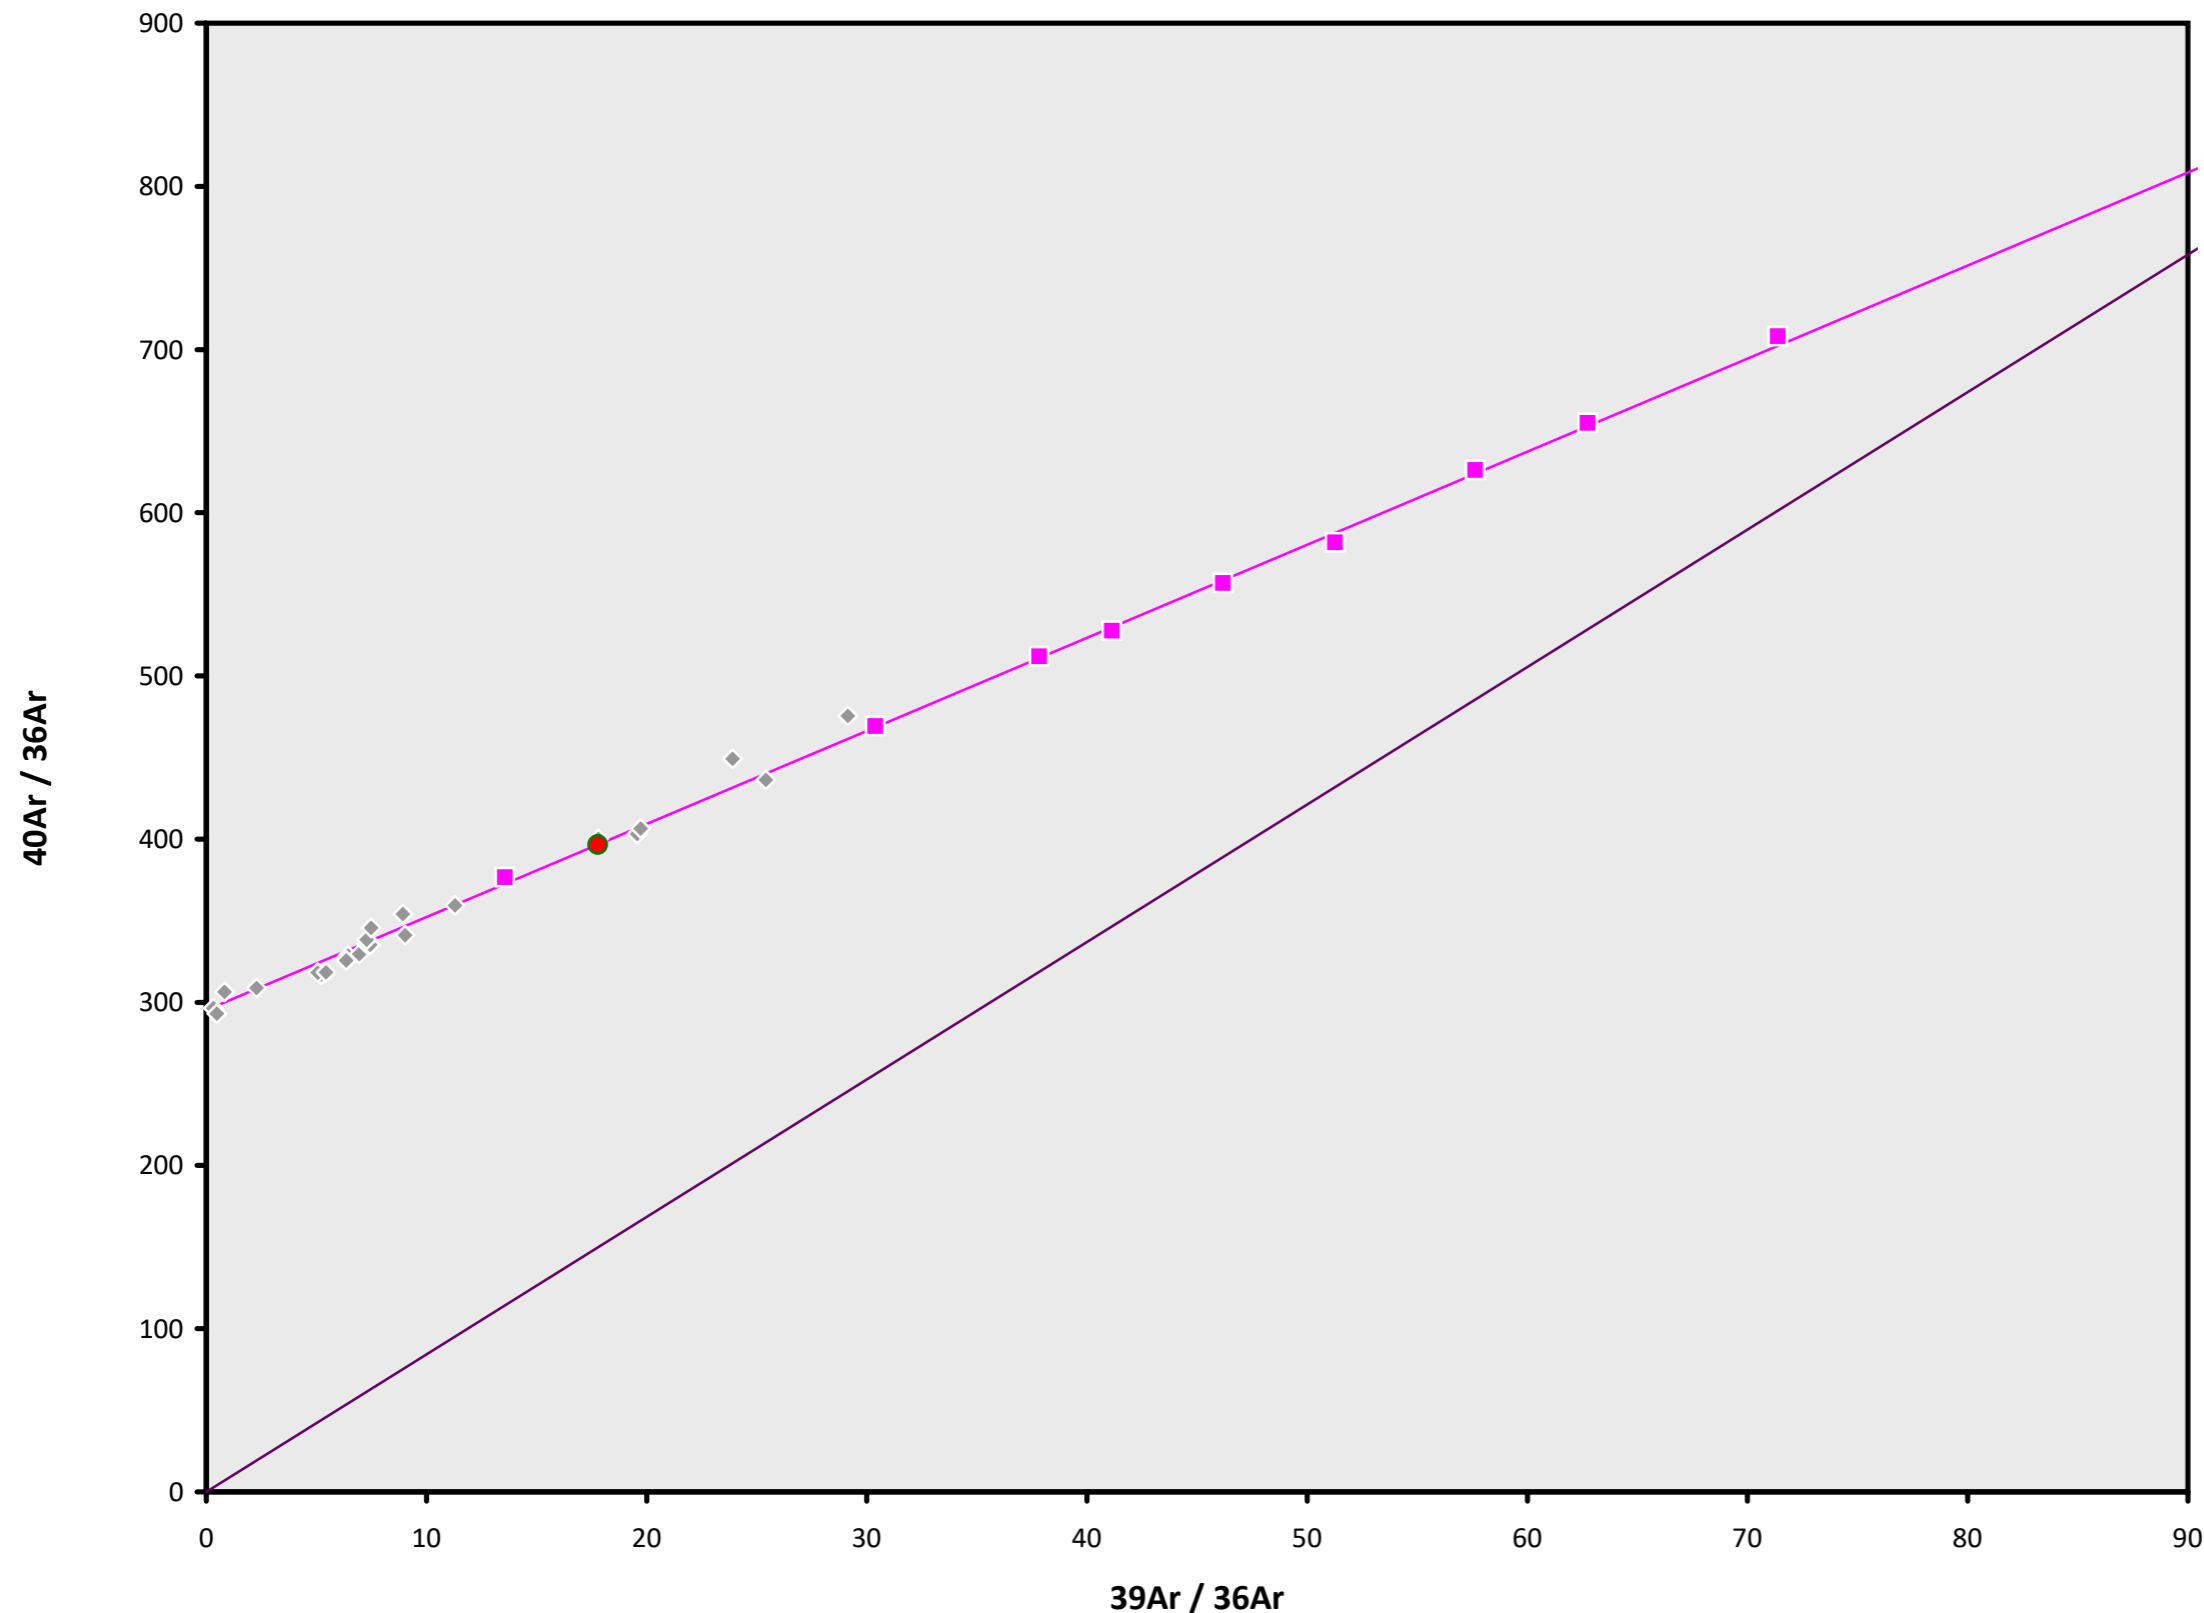

### Ar-Ages in Ma

#### WEIGHTED PLATEAU

$17.11 \pm 0.15$

#### TOTAL FUSION

$16.76 \pm 0.12$

#### NORMAL ISOCHRON

$17.32 \pm 0.52$

#### INVERSE ISOCHRON

$17.32 \pm 0.51$

#### MSWD (PROBABILITY)

1.68 (11%)

#### CALCULATED $40\text{Ar}/36\text{Ar}$

#### INTERCEPT

$295.1 \pm 8.0$

### Sample Info

Plagioclase

Hells Canyon

Dan Miggins

IRR = 22-OSU-05 (5D10-22)

$J = 0.00166647 \pm 0.00000210$

23F04438.AGE >>> MM-CRB-32 >>> OREGON | MASS (22-34) PROJECT

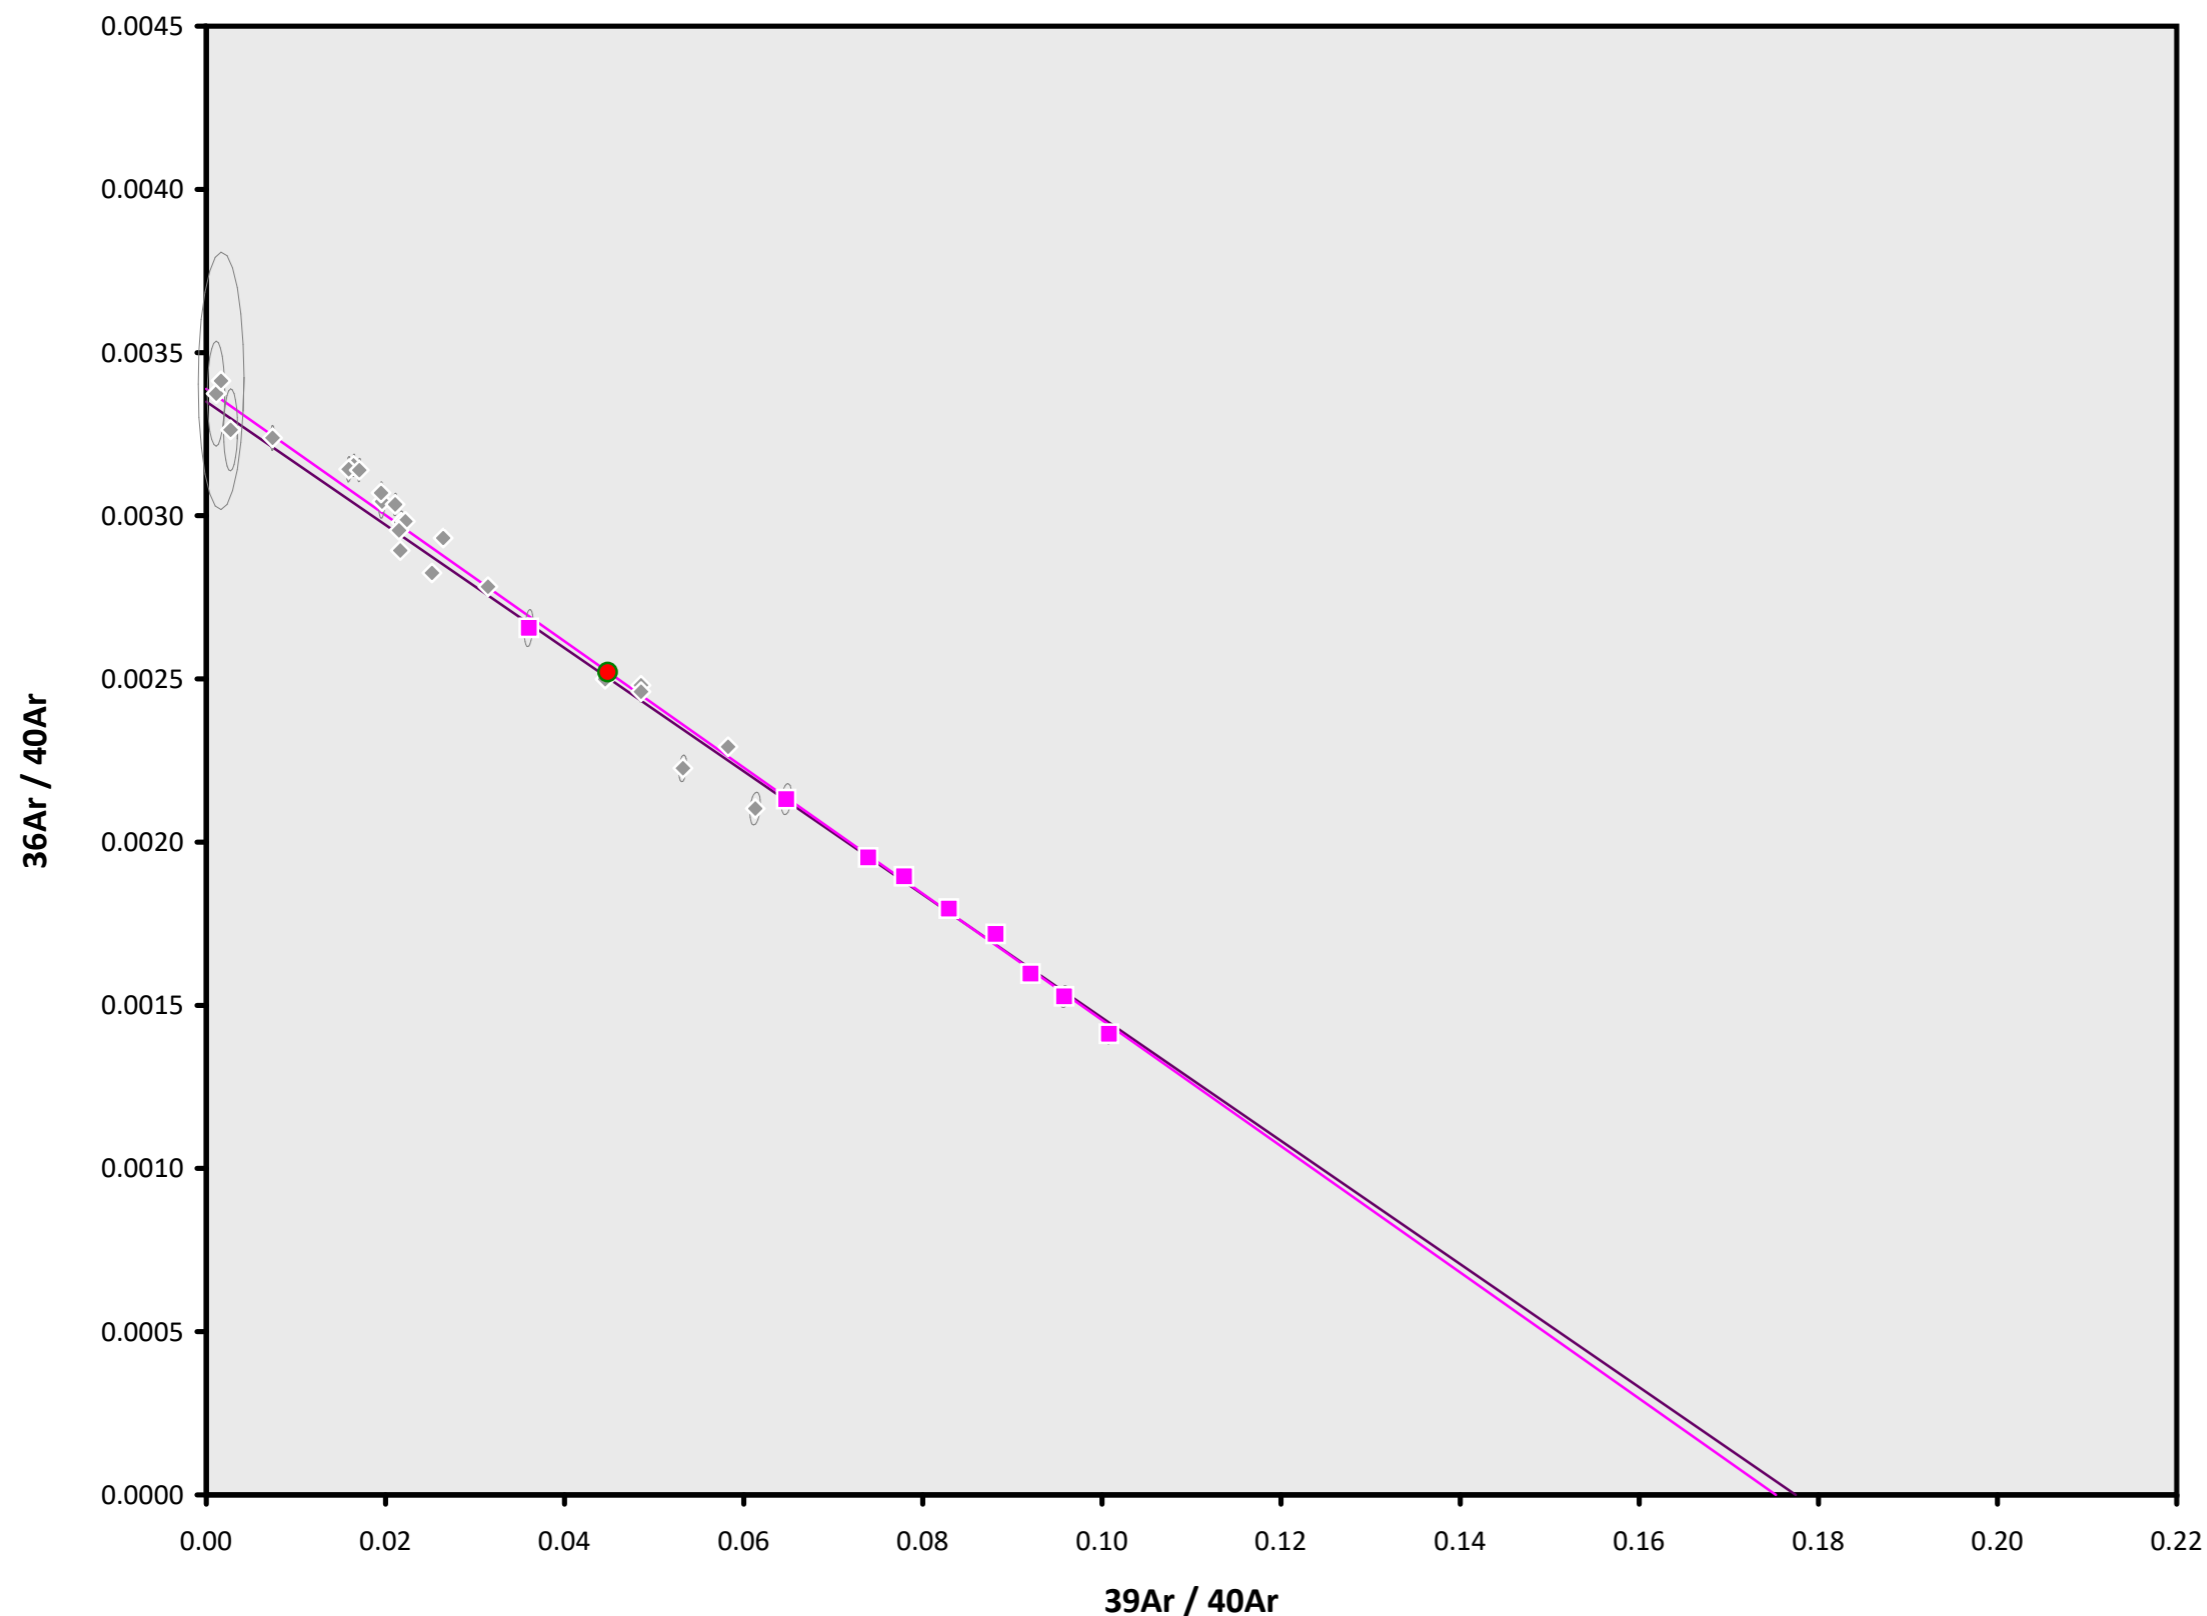

### Ar-Ages in Ma

#### WEIGHTED PLATEAU

$17.11 \pm 0.15$

#### TOTAL FUSION

$16.76 \pm 0.12$

#### NORMAL ISOCHRON

$17.32 \pm 0.52$

#### INVERSE ISOCHRON

$17.32 \pm 0.51$

#### MSWD (PROBABILITY)

1.68 (11%)

#### SPREADING FACTOR

37.0%

#### CALCULATED 40AR/36AR

INTERCEPT

$295.1 \pm 7.9$

### Sample Info

Plagioclase

Hells Canyon

Dan Miggins

IRR = 22-OSU-05 (5D10-22)

J =  $0.00166647 \pm 0.00000210$
