# Supplementary material for: Province-Wide Tapping of a Shallow, Variably Depleted, and Metasomatized Mantle to Generate Earliest Flood Basalt Magmas of the Columbia River Basalt, Northwestern USA
Source: MDPI journal article supplement (doi:10.3390/min13121544), 2023-12-14
Supplement: s1 [file s1]

| Relative Abundances |        | 36Ar<br>[fA] | %1σ   | 37Ar<br>[fA] | %1σ   | 38Ar<br>[fA] | %1σ    | 39Ar<br>[fA] | %1σ   | 40Ar<br>[fA] | %1σ   | 40(r)/39(k) ± 2σ   | Age ± 2σ<br>(Ma) | 40Ar(r)<br>(%) | 39Ar(k)<br>(%) | K/Ca ± 2σ     |
|---------------------|--------|--------------|-------|--------------|-------|--------------|--------|--------------|-------|--------------|-------|--------------------|------------------|----------------|----------------|---------------|
| 23G08914            | 0.8 %  | 3.959702     | 0.242 | 2.0817       | 0.884 | 0.754667     | 1.224  | 0.60964      | 1.526 | 1183.418     | 0.009 | 2.26414 ± 10.24459 | 6.45 ± 29.12     | 0.12           | 0.14           | 0.126 ± 0.004 |
| 23G08915            | 1.0 %  | 5.464822     | 0.242 | 5.3898       | 0.375 | 1.063104     | 0.860  | 1.62840      | 0.572 | 1646.143     | 0.007 | 9.23092 ± 5.28320  | 26.14 ± 14.86    | 0.91           | 0.36           | 0.130 ± 0.002 |
| 23G08917            | 1.2 %  | 5.731576     | 0.240 | 8.0553       | 0.287 | 1.121448     | 0.799  | 2.49209      | 0.377 | 1736.540     | 0.007 | 10.44259 ± 3.59513 | 29.55 ± 10.09    | 1.50           | 0.56           | 0.133 ± 0.001 |
| 23G08918            | 1.4 %  | 4.640358     | 0.241 | 9.0740       | 0.283 | 0.917632     | 0.954  | 2.93069      | 0.318 | 1413.974     | 0.008 | 10.01060 ± 2.48451 | 28.33 ± 6.98     | 2.07           | 0.66           | 0.139 ± 0.001 |
| 23G08920            | 1.7 %  | 4.388387     | 0.241 | 11.3377      | 0.250 | 0.853504     | 1.063  | 3.71715      | 0.238 | 1344.900     | 0.008 | 9.60034 ± 1.85233  | 27.18 ± 5.21     | 2.65           | 0.83           | 0.141 ± 0.001 |
| 23G08921            | 2.0 %  | 4.510736     | 0.242 | 17.6431      | 0.218 | 0.913912     | 1.008  | 5.94485      | 0.169 | 1400.616     | 0.008 | 9.32181 ± 1.19452  | 26.40 ± 3.36     | 3.95           | 1.33           | 0.145 ± 0.001 |
| 23G08923            | 2.4 %  | 4.209417     | 0.242 | 24.0477      | 0.212 | 0.875876     | 1.021  | 8.22994      | 0.127 | 1326.759     | 0.008 | 8.75665 ± 0.80592  | 24.81 ± 2.27     | 5.42           | 1.84           | 0.147 ± 0.001 |
| 23G08924            | 2.8 %  | 5.356870     | 0.241 | 53.0420      | 0.199 | 1.200724     | 0.741  | 18.22396     | 0.078 | 1734.591     | 0.007 | 7.66982 ± 0.46215  | 21.75 ± 1.30     | 8.04           | 4.08           | 0.147 ± 0.001 |
| 23G08926            | 3.2 %  | 3.671907     | 0.245 | 51.1584      | 0.200 | 0.899449     | 1.069  | 17.86546     | 0.081 | 1224.521     | 0.009 | 7.42204 ± 0.32751  | 21.05 ± 0.92     | 10.81          | 4.00           | 0.150 ± 0.001 |
| 23G08927            | 3.6 %  | 2.216913     | 0.251 | 42.4656      | 0.202 | 0.597048     | 1.408  | 15.26746     | 0.085 | 768.120      | 0.014 | 7.19519 ± 0.23624  | 20.41 ± 0.67     | 14.28          | 3.42           | 0.154 ± 0.001 |
| 23G08929            | 4.0 %  | 1.933270     | 0.256 | 52.8902      | 0.200 | 0.584872     | 1.514  | 19.36367     | 0.079 | 707.008      | 0.015 | 6.93584 ± 0.16577  | 19.68 ± 0.47     | 18.96          | 4.34           | 0.157 ± 0.001 |
| 23G08930            | 4.5 %  | 1.859373     | 0.257 | 59.7869      | 0.198 | 0.630324     | 1.355  | 22.83493     | 0.075 | 701.716      | 0.015 | 6.64104 ± 0.13573  | 18.84 ± 0.38     | 21.57          | 5.12           | 0.164 ± 0.001 |
| 23G08932            | 4.9 %  | 1.651692     | 0.260 | 66.2998      | 0.198 | 0.631637     | 1.471  | 26.41217     | 0.070 | 657.493      | 0.016 | 6.43539 ± 0.10532  | 18.26 ± 0.30     | 25.81          | 5.92           | 0.171 ± 0.001 |
| 23G08933            | 5.3 %  | 1.467753     | 0.263 | 65.0012      | 0.198 | 0.601566     | 1.506  | 27.24416     | 0.069 | 604.876      | 0.018 | 6.31905 ± 0.09184  | 17.94 ± 0.26     | 28.42          | 6.11           | 0.180 ± 0.001 |
| 23G08935            | 5.7 %  | 1.203136     | 0.269 | 57.8282      | 0.199 | 0.528327     | 1.672  | 25.68560     | 0.070 | 516.980      | 0.020 | 6.33268 ± 0.08168  | 17.97 ± 0.23     | 31.42          | 5.76           | 0.191 ± 0.001 |
| 23G08936            | 6.1 %  | 0.761183     | 0.288 | 43.9619      | 0.201 | 0.385605     | 2.365  | 20.87999     | 0.076 | 354.303      | 0.030 | 6.26229 ± 0.06802  | 17.78 ± 0.19     | 36.86          | 4.68           | 0.204 ± 0.001 |
| 23G08938            | 6.5 %  | 0.600148     | 0.298 | 37.1743      | 0.203 | 0.340109     | 2.525  | 18.49574     | 0.082 | 291.152      | 0.036 | 6.22356 ± 0.06298  | 17.67 ± 0.18     | 39.48          | 4.15           | 0.214 ± 0.001 |
| 23G08939            | 6.9 %  | 0.632411     | 0.307 | 37.8429      | 0.203 | 0.348419     | 2.579  | 19.18373     | 0.080 | 303.935      | 0.034 | 6.16746 ± 0.06546  | 17.51 ± 0.18     | 38.88          | 4.30           | 0.218 ± 0.001 |
| 23G08941            | 7.4 %  | ✓ 0.620942   | 0.308 | ✓ 37.7662    | 0.203 | 0.352802     | 2.661  | ✓ 19.86483   | 0.077 | 303.658      | 0.034 | 6.11401 ± 0.06230  | 17.36 ± 0.18     | 39.95          | 4.45           | 0.226 ± 0.001 |
| 23G08942            | 8.0 %  | ✓ 0.506991   | 0.335 | ✓ 36.9441    | 0.204 | 0.326895     | 2.754  | ✓ 19.69808   | 0.079 | 267.982      | 0.038 | 6.07819 ± 0.05567  | 17.26 ± 0.16     | 44.62          | 4.42           | 0.229 ± 0.001 |
| 23G08944            | 8.6 %  | ✓ 0.471021   | 0.349 | ✓ 33.1765    | 0.205 | 0.301173     | 2.792  | ✓ 17.68276   | 0.080 | 244.704      | 0.042 | 6.04381 ± 0.05985  | 17.16 ± 0.17     | 43.62          | 3.96           | 0.229 ± 0.001 |
| 23G08945            | 9.6 %  | ✓ 0.732419   | 0.299 | ✓ 64.0071    | 0.199 | 0.439131     | 1.985  | ✓ 24.75634   | 0.070 | 362.700      | 0.029 | 6.03591 ± 0.05711  | 17.14 ± 0.16     | 41.13          | 5.55           | 0.166 ± 0.001 |
| 23G08947            | 10.6 % | ✓ 0.550380   | 0.310 | ✓ 51.8519    | 0.200 | 0.346974     | 2.489  | ✓ 20.03437   | 0.075 | 281.477      | 0.037 | 6.06606 ± 0.05537  | 17.22 ± 0.16     | 43.10          | 4.49           | 0.166 ± 0.001 |
| 23G08948            | 12.0 % | ✓ 0.450423   | 0.341 | ✓ 51.9192    | 0.200 | 0.296943     | 2.877  | ✓ 17.85251   | 0.083 | 238.346      | 0.043 | 6.06352 ± 0.05584  | 17.21 ± 0.16     | 45.33          | 4.00           | 0.148 ± 0.001 |
| 23G08950            | 13.5 % | ✓ 0.310549   | 0.403 | ✓ 51.1314    | 0.200 | 0.229714     | 4.005  | ✓ 14.36162   | 0.091 | 175.110      | 0.059 | 6.03750 ± 0.05672  | 17.14 ± 0.16     | 49.40          | 3.22           | 0.121 ± 0.001 |
| 23G08951            | 15.0 % | ✓ 0.304371   | 0.394 | ✓ 57.4608    | 0.199 | 0.204087     | 4.341  | ✓ 12.38165   | 0.098 | 160.956      | 0.064 | 6.05220 ± 0.06319  | 17.18 ± 0.18     | 46.42          | 2.77           | 0.092 ± 0.000 |
| 23G08953            | 16.6 % | ✓ 0.233358   | 0.456 | ✓ 74.7485    | 0.198 | 0.164321     | 5.521  | ✓ 10.34019   | 0.103 | 125.296      | 0.082 | 5.99011 ± 0.06738  | 17.01 ± 0.19     | 49.20          | 2.31           | 0.059 ± 0.000 |
| 23G08954            | 18.2 % | ✓ 0.174770   | 0.523 | ✓ 67.5422    | 0.199 | 0.133093     | 6.738  | ✓ 8.01181    | 0.129 | 93.980       | 0.108 | 5.92921 ± 0.07574  | 16.83 ± 0.21     | 50.27          | 1.79           | 0.051 ± 0.000 |
| 23G08956            | 19.6 % | ✓ 0.135259   | 0.632 | ✓ 48.9822    | 0.200 | 0.100774     | 9.135  | ✓ 6.16481    | 0.164 | 73.753       | 0.139 | 6.08461 ± 0.09281  | 17.27 ± 0.26     | 50.60          | 1.38           | 0.054 ± 0.000 |
| 23G08957            | 21.5 % | ✓ 0.112004   | 0.720 | ✓ 50.2527    | 0.200 | 0.096846     | 9.179  | ✓ 5.55828    | 0.174 | 63.025       | 0.162 | 6.08711 ± 0.09766  | 17.28 ± 0.28     | 53.37          | 1.24           | 0.047 ± 0.000 |
| 23G08959            | 22.8 % | ✓ 0.076849   | 0.962 | ✓ 48.5453    | 0.200 | 0.073872     | 13.029 | ✓ 4.53295    | 0.222 | 46.403       | 0.218 | 6.08077 ± 0.11175  | 17.26 ± 0.32     | 58.99          | 1.01           | 0.040 ± 0.000 |
| 23G08960            | 24.5 % | 0.065986     | 1.080 | 50.8529      | 0.200 | 0.071503     | 11.632 | 4.26428      | 0.224 | 40.751       | 0.249 | 5.94381 ± 0.11500  | 16.88 ± 0.33     | 61.72          | 0.95           | 0.036 ± 0.000 |
| 23G08962            | 26.0 % | 0.054362     | 1.240 | 50.5763      | 0.200 | 0.061560     | 13.531 | 3.94534      | 0.242 | 35.275       | 0.288 | 5.90983 ± 0.11905  | 16.78 ± 0.34     | 65.55          | 0.88           | 0.033 ± 0.000 |
| Σ                   |        | 59.059337    | 0.062 | 1420.8383    | 0.038 | 16.447910    | 0.312  | 446.45943    | 0.017 | 20430.464    | 0.003 |                    |                  |                |                |               |

| Information on Analysis and Constants Used in Calculations                                                                                                                                                                                                                                                                                                                                                                                                                                                                                                                                                                                                                                                                                                                                                                                                                                                                                                                                                                          |                                                                                                                                                                                                                                                                                                                                                                                                                                                                                                                                                                                                                                                                                                                                                                                                                                                                                                                                                                                                                                                                                                                         |
|-------------------------------------------------------------------------------------------------------------------------------------------------------------------------------------------------------------------------------------------------------------------------------------------------------------------------------------------------------------------------------------------------------------------------------------------------------------------------------------------------------------------------------------------------------------------------------------------------------------------------------------------------------------------------------------------------------------------------------------------------------------------------------------------------------------------------------------------------------------------------------------------------------------------------------------------------------------------------------------------------------------------------------------|-------------------------------------------------------------------------------------------------------------------------------------------------------------------------------------------------------------------------------------------------------------------------------------------------------------------------------------------------------------------------------------------------------------------------------------------------------------------------------------------------------------------------------------------------------------------------------------------------------------------------------------------------------------------------------------------------------------------------------------------------------------------------------------------------------------------------------------------------------------------------------------------------------------------------------------------------------------------------------------------------------------------------------------------------------------------------------------------------------------------------|
| Project = <b>MASS (22-34)</b><br>Sample = <b>LF-21-54</b><br>Material = <b>GROUNDMASS</b><br>Location = <b>Hells Canyon</b><br>Region = <b>Western Cascades</b><br>Analyst = <b>Dan Miggins</b><br>Irradiation = <b>23-OSU-01 (1A37-23)</b><br>Position = <b>X: 999   Y: 999   Z/H: 58.17365 mm</b><br>FCT-NM Age = <b>28.201 ± 0.023 Ma</b><br>FCT-NM Reference = <b>Kuiper et al (2008)</b><br>FCT-NM 40Ar/39Ar Ratio = <b>9.96371 ± 0.00847</b><br>FCT-NM J-value = <b>0.00155820 ± 0.00000132</b><br>Air Shot 40Ar/36Ar = <b>306.3430 ± 0.6311</b><br>Air Shot MDF = <b>0.99364025 ± 0.00056298 (LIN)</b><br>Experiment Type = <b>Incremental Heating</b><br>Extraction Method = <b>Bulk Laser Heating</b><br>Heating = <b>50 sec</b><br>Isolation = <b>3.00 min</b><br>Instrument = <b>ARGUS-VI-G</b><br>Preferred Age = <b>Mini Plateau</b><br>Age Classification = <b>Crystallization Age</b><br>IGSN = <b>13</b><br>Rock Class = <b>Undefined</b><br>Lithology = <b>Undefined</b><br>Lat-Lon = <b>Undefined - Undefined</b> | Age Equations = <b>Min et al. (2000)</b><br>Negative Intensities = <b>Allowed</b><br>Collector Calibrations = <b>36Ar</b><br>Decay 40K(total) = <b>5.463 ± 0.107 E-10 1/a</b><br>Decay 40K(EC,β <sup>+</sup> ) = <b>0.580 ± 0.014 E-10 1/a</b><br>Decay 40K(β <sup>-</sup> ) = <b>4.884 ± 0.099 E-10 1/a</b><br>Decay 39Ar = <b>2.940 ± 0.016 E-07 1/h</b><br>Decay 37Ar = <b>8.230 ± 0.012 E-04 1/h</b><br>Decay 36Cl = <b>2.257 ± 0.015 E-06 1/a</b><br>Production 39/37(ca) = <b>0.0006425 ± 0.0000059</b><br>Production 38/37(ca) = <b>0.0001800 ± 0.0000173</b><br>Production 36/37(ca) = <b>0.0002703 ± 0.0000005</b><br>Production 40/39(k) = <b>0.000607 ± 0.000059</b><br>Production 38/39(k) = <b>0.012077 ± 0.000011</b><br>Production 36/38(cl) = <b>262.80 ± 1.71</b><br>Scaling Ratio K/Ca = <b>0.430</b><br>Abundance Ratio 40K/K = <b>1.1700 ± 0.0100 E-04</b><br>Atomic Weight K = <b>39.0983 ± 0.0001 g</b><br>Trapped 40/36(a) = <b>298.56 ± 0.31</b><br>Trapped 38/36(a) = <b>0.1885 ± 0.0003</b><br>Standard MDF 40/36(a) = <b>298.56 ± 0.31</b><br>Standard MDF Reference = <b>Lee et al 2006</b> |

| Results          | 40(a)/36(a) ± 2σ         | 40(r)/39(k) ± 2σ                                      | Age ± 2σ<br>(Ma)        | MSWD               | 39Ar(k)<br>(%,n)                           | K/Ca ± 2σ     |
|------------------|--------------------------|-------------------------------------------------------|-------------------------|--------------------|--------------------------------------------|---------------|
| Age Plateau      |                          | 6.05062 ± 0.02392<br>± 0.40%                          | 17.18 ± 0.07<br>± 0.43% | 1.76<br>5%         | 40.58<br>13                                | 0.125 ± 0.041 |
|                  |                          | Full External Error ± 0.89<br>Analytical Error ± 0.07 |                         | 1.82<br>1.3252     | 2σ Confidence Limit<br>Error Magnification |               |
| Total Fusion Age |                          | 6.53602 ± 0.05306<br>± 0.81%                          | 18.55 ± 0.15<br>± 0.83% |                    | 33                                         | 0.135 ± 0.000 |
|                  |                          | Full External Error ± 0.97<br>Analytical Error ± 0.15 |                         |                    |                                            |               |
| Normal Isochron  | 303.27 ± 5.87<br>± 1.94% | 5.93584 ± 0.14480<br>± 2.44%                          | 16.85 ± 0.41<br>± 2.43% | 1.65<br>8%         | 40.58<br>13                                |               |
|                  |                          | Full External Error ± 0.97<br>Analytical Error ± 0.41 |                         | 1.85<br>1.2827     | 2σ Confidence Limit<br>Error Magnification |               |
|                  |                          |                                                       |                         | 16<br>0.0000381589 | Number of Iterations<br>Convergence        |               |
| Inverse Isochron | 303.10 ± 5.84<br>± 1.93% | 5.94056 ± 0.14359<br>± 2.42%                          | 16.87 ± 0.41<br>± 2.41% | 1.63<br>8%         | 40.58<br>13                                |               |
|                  |                          | Full External Error ± 0.96<br>Analytical Error ± 0.41 |                         | 1.85<br>1.2785     | 2σ Confidence Limit<br>Error Magnification |               |
|                  |                          |                                                       |                         | 4<br>0.0000208576  | Number of Iterations<br>Convergence        |               |
|                  |                          |                                                       |                         | 19%                | Spreading Factor                           |               |

| Inverse Isochron |        | 39(k)/40(a+r) ± 2σ    | 36(a)/40(a+r) ± 2σ      |
|------------------|--------|-----------------------|-------------------------|
| 23G08914         | 0.8 %  | 0.0005140 ± 0.0000157 | 0.00334551 ± 0.00001621 |
| 23G08915         | 1.0 %  | 0.0009871 ± 0.0000113 | 0.00331889 ± 0.00001604 |
| 23G08917         | 1.2 %  | 0.0014321 ± 0.0000108 | 0.00329932 ± 0.00001582 |
| 23G08918         | 1.4 %  | 0.0020685 ± 0.0000132 | 0.00328005 ± 0.00001580 |
| 23G08920         | 1.7 %  | 0.0027585 ± 0.0000131 | 0.00326071 ± 0.00001571 |
| 23G08921         | 2.0 %  | 0.0042364 ± 0.0000143 | 0.00321714 ± 0.00001557 |
| 23G08923         | 2.4 %  | 0.0061914 ± 0.0000158 | 0.00316782 ± 0.00001535 |
| 23G08924         | 2.8 %  | 0.0104866 ± 0.0000165 | 0.00308002 ± 0.00001491 |
| 23G08926         | 3.2 %  | 0.0145630 ± 0.0000237 | 0.00298738 ± 0.00001470 |
| 23G08927         | 3.6 %  | 0.0198411 ± 0.0000343 | 0.00287125 ± 0.00001449 |
| 23G08929         | 4.0 %  | 0.0273406 ± 0.0000442 | 0.00271426 ± 0.00001404 |
| 23G08930         | 4.5 %  | 0.0324875 ± 0.0000500 | 0.00262677 ± 0.00001366 |
| 23G08932         | 4.9 %  | 0.0401072 ± 0.0000577 | 0.00248491 ± 0.00001309 |
| 23G08933         | 5.3 %  | 0.0449731 ± 0.0000638 | 0.00239755 ± 0.00001281 |
| 23G08935         | 5.7 %  | 0.0496135 ± 0.0000728 | 0.00229707 ± 0.00001258 |
| 23G08936         | 6.1 %  | 0.0588549 ± 0.0000964 | 0.00211493 ± 0.00001243 |
| 23G08938         | 6.5 %  | 0.0634464 ± 0.0001138 | 0.00202685 ± 0.00001237 |
| 23G08939         | 6.9 %  | 0.0630402 ± 0.0001094 | 0.00204717 ± 0.00001286 |
| 23G08941         | 7.4 %  | 0.0653411 ± 0.0001106 | 0.00201133 ± 0.00001268 |
| 23G08942         | 8.0 %  | 0.0734199 ± 0.0001289 | 0.00185470 ± 0.00001274 |
| 23G08944         | 8.6 %  | 0.0721779 ± 0.0001312 | 0.00188830 ± 0.00001353 |
| 23G08945         | 9.6 %  | 0.0681452 ± 0.0001038 | 0.00197174 ± 0.00001212 |
| 23G08947         | 10.6 % | 0.0710607 ± 0.0001188 | 0.00190562 ± 0.00001221 |
| 23G08948         | 12.0 % | 0.0747651 ± 0.0001406 | 0.00183099 ± 0.00001299 |
| 23G08950         | 13.5 % | 0.0818314 ± 0.0001779 | 0.00169461 ± 0.00001444 |
| 23G08951         | 15.0 % | 0.0766997 ± 0.0001793 | 0.00179461 ± 0.00001508 |
| 23G08953         | 16.6 % | 0.0821466 ± 0.0002170 | 0.00170128 ± 0.00001724 |
| 23G08954         | 18.2 % | 0.0847929 ± 0.0002868 | 0.00166548 ± 0.00001980 |
| 23G08956         | 19.6 % | 0.0831651 ± 0.0003590 | 0.00165452 ± 0.00002365 |
| 23G08957         | 21.5 % | 0.0876838 ± 0.0004179 | 0.00156169 ± 0.00002610 |
| 23G08959         | 22.8 % | 0.0970193 ± 0.0006071 | 0.00137342 ± 0.00003247 |
| 23G08960         | 24.5 % | 0.1038462 ± 0.0006983 | 0.00128201 ± 0.00003561 |
| 23G08962         | 26.0 % | 0.1109306 ± 0.0008367 | 0.00115360 ± 0.00003884 |

| r.i.   |
|--------|
| 0.0002 |
| 0.0004 |
| 0.0005 |
| 0.0008 |
| 0.0012 |
| 0.0016 |
| 0.0022 |
| 0.0025 |
| 0.0040 |
| 0.0091 |
| 0.0110 |
| 0.0117 |
| 0.0138 |
| 0.0168 |
| 0.0207 |
| 0.0369 |
| 0.0461 |
| 0.0425 |
| 0.0438 |
| 0.0491 |
| 0.0544 |
| 0.0352 |
| 0.0503 |
| 0.0564 |
| 0.0744 |
| 0.0823 |
| 0.0996 |
| 0.1166 |
| 0.1253 |
| 0.1312 |
| 0.1290 |
| 0.1329 |
| 0.1303 |

| MSWD   |
|--------|
| 1.63   |
| 8%     |
| 208576 |
| 4      |
| York-2 |

| Incremental Heating |        | 36Ar(a)<br>[fA] | 37Ar(ca)<br>[fA] | 38Ar(cl)<br>[fA] | 39Ar(k)<br>[fA] | 40Ar(r)<br>[fA] | Age ± 2σ<br>(Ma) | 40Ar(r)<br>(%) | 39Ar(k)<br>(%) | K/Ca ± 2σ     |
|---------------------|--------|-----------------|------------------|------------------|-----------------|-----------------|------------------|----------------|----------------|---------------|
| 23G08914            | 0.8 %  | 3.959139        | 2.0817           | 0.0006477        | 0.60831         | 1.3773          | 6.45 ± 29.12     | 0.12           | 0.14           | 0.126 ± 0.004 |
| 23G08915            | 1.0 %  | 5.463364        | 5.3898           | 0.0126656        | 1.62493         | 14.9996         | 26.14 ± 14.86    | 0.91           | 0.36           | 0.130 ± 0.002 |
| 23G08917            | 1.2 %  | 5.729398        | 8.0553           | 0.0099718        | 2.48692         | 25.9698         | 29.55 ± 10.09    | 1.50           | 0.56           | 0.133 ± 0.001 |
| 23G08918            | 1.4 %  | 4.637905        | 9.0740           | 0.0064304        | 2.92486         | 29.2796         | 28.33 ± 6.98     | 2.07           | 0.66           | 0.139 ± 0.001 |
| 23G08920            | 1.7 %  | 4.385322        | 11.3377          | 0.0000000        | 3.70986         | 35.6159         | 27.18 ± 5.21     | 2.65           | 0.83           | 0.141 ± 0.001 |
| 23G08921            | 2.0 %  | 4.505967        | 17.6431          | 0.0000000        | 5.93351         | 55.3111         | 26.40 ± 3.36     | 3.95           | 1.33           | 0.145 ± 0.001 |
| 23G08923            | 2.4 %  | 4.202917        | 24.0477          | 0.0000000        | 8.21449         | 71.9314         | 24.81 ± 2.27     | 5.42           | 1.84           | 0.147 ± 0.001 |
| 23G08924            | 2.8 %  | 5.342533        | 53.0420          | 0.0000000        | 18.18988        | 139.5132        | 21.75 ± 1.30     | 8.04           | 4.08           | 0.147 ± 0.001 |
| 23G08926            | 3.2 %  | 3.658079        | 51.1584          | 0.0000000        | 17.83259        | 132.3542        | 21.05 ± 0.92     | 10.81          | 4.00           | 0.150 ± 0.001 |
| 23G08927            | 3.6 %  | 2.205435        | 42.4656          | 0.0000000        | 15.24017        | 109.6560        | 20.41 ± 0.67     | 14.28          | 3.42           | 0.154 ± 0.001 |
| 23G08929            | 4.0 %  | 1.918974        | 52.8902          | 0.0000000        | 19.32969        | 134.0676        | 19.68 ± 0.47     | 18.96          | 4.34           | 0.157 ± 0.001 |
| 23G08930            | 4.5 %  | 1.843212        | 59.7869          | 0.0000000        | 22.79651        | 151.3926        | 18.84 ± 0.38     | 21.57          | 5.12           | 0.164 ± 0.001 |
| 23G08932            | 4.9 %  | 1.633771        | 66.2998          | 0.0000000        | 26.36957        | 169.6984        | 18.26 ± 0.30     | 25.81          | 5.92           | 0.171 ± 0.001 |
| 23G08933            | 5.3 %  | 1.450183        | 65.0012          | 0.0000000        | 27.20240        | 171.8932        | 17.94 ± 0.26     | 28.42          | 6.11           | 0.180 ± 0.001 |
| 23G08935            | 5.7 %  | 1.187505        | 57.8282          | 0.0000000        | 25.64845        | 162.4234        | 17.97 ± 0.23     | 31.42          | 5.76           | 0.191 ± 0.001 |
| 23G08936            | 6.1 %  | 0.749900        | 43.9619          | 0.0000000        | 20.85174        | 130.5796        | 17.78 ± 0.19     | 36.86          | 4.68           | 0.204 ± 0.001 |
| 23G08938            | 6.5 %  | 0.590100        | 37.1743          | 0.0000000        | 18.47186        | 114.9607        | 17.67 ± 0.18     | 39.48          | 4.15           | 0.214 ± 0.001 |
| 23G08939            | 6.9 %  | 0.622182        | 37.8429          | 0.0000000        | 19.15941        | 118.1649        | 17.51 ± 0.18     | 38.88          | 4.30           | 0.218 ± 0.001 |
| 23G08941            | 7.4 %  | ✓ 0.610734      | 37.7662          | 0.0000000        | 19.84056        | 121.3054        | 17.36 ± 0.18     | 39.95          | 4.45           | 0.226 ± 0.001 |
| 23G08942            | 8.0 %  | ✓ 0.497005      | 36.9441          | 0.0000000        | 19.67434        | 119.5844        | 17.26 ± 0.16     | 44.62          | 4.42           | 0.229 ± 0.001 |
| 23G08944            | 8.6 %  | ✓ 0.462054      | 33.1765          | 0.0000000        | 17.66144        | 106.7424        | 17.16 ± 0.17     | 43.62          | 3.96           | 0.229 ± 0.001 |
| 23G08945            | 9.6 %  | ✓ 0.715118      | 64.0071          | 0.0000000        | 24.71522        | 149.1789        | 17.14 ± 0.16     | 41.13          | 5.55           | 0.166 ± 0.001 |
| 23G08947            | 10.6 % | ✓ 0.536364      | 51.8519          | 0.0000000        | 20.00106        | 121.3275        | 17.22 ± 0.16     | 43.10          | 4.49           | 0.166 ± 0.001 |
| 23G08948            | 12.0 % | ✓ 0.436389      | 51.9192          | 0.0000000        | 17.81916        | 108.0469        | 17.21 ± 0.16     | 45.33          | 4.00           | 0.148 ± 0.001 |
| 23G08950            | 13.5 % | ✓ 0.296728      | 51.1314          | 0.0000000        | 14.32877        | 86.5099         | 17.14 ± 0.16     | 49.40          | 3.22           | 0.121 ± 0.001 |
| 23G08951            | 15.0 % | ✓ 0.288840      | 57.4608          | 0.0000000        | 12.34473        | 74.7128         | 17.18 ± 0.18     | 46.42          | 2.77           | 0.092 ± 0.000 |
| 23G08953            | 16.6 % | ✓ 0.213153      | 74.7485          | 0.0000000        | 10.29216        | 61.6512         | 17.01 ± 0.19     | 49.20          | 2.31           | 0.059 ± 0.000 |
| 23G08954            | 18.2 % | ✓ 0.156513      | 67.5422          | 0.0000000        | 7.96841         | 47.2463         | 16.83 ± 0.21     | 50.27          | 1.79           | 0.051 ± 0.000 |
| 23G08956            | 19.6 % | ✓ 0.122019      | 48.9822          | 0.0000000        | 6.13334         | 37.3190         | 17.27 ± 0.26     | 50.60          | 1.38           | 0.054 ± 0.000 |
| 23G08957            | 21.5 % | ✓ 0.098421      | 50.2527          | 0.0025109        | 5.52599         | 33.6373         | 17.28 ± 0.28     | 53.37          | 1.24           | 0.047 ± 0.000 |
| 23G08959            | 22.8 % | ✓ 0.063728      | 48.5453          | 0.0000000        | 4.50176         | 27.3741         | 17.26 ± 0.32     | 58.99          | 1.01           | 0.040 ± 0.000 |
| 23G08960            | 24.5 % | 0.052240        | 50.8529          | 0.0013971        | 4.23161         | 25.1519         | 16.88 ± 0.33     | 61.72          | 0.95           | 0.036 ± 0.000 |
| 23G08962            | 26.0 % | 0.040691        | 50.5763          | 0.0000000        | 3.91285         | 23.1243         | 16.78 ± 0.34     | 65.55          | 0.88           | 0.033 ± 0.000 |
| Σ                   |        | 58.675283       | 1420.8383        | 0.0336235        | 445.54654       | 2912.1010       |                  |                |                |               |

| Information on Analysis                                                                                                                                                                                                                                                                                                | Results          | 40(r)/39(k) ± 2σ                                      | Age ± 2σ<br>(Ma)     | MSWD                             | 39Ar(k)<br>(%,n)                           | K/Ca ± 2σ     |
|------------------------------------------------------------------------------------------------------------------------------------------------------------------------------------------------------------------------------------------------------------------------------------------------------------------------|------------------|-------------------------------------------------------|----------------------|----------------------------------|--------------------------------------------|---------------|
| Project = <b>MASS (22-34)</b><br>Sample = <b>LF-21-54</b><br>Material = <b>GROUNDMASS</b><br>Location = <b>Hells Canyon</b><br>Region = <b>Western Cascades</b><br>Analyst = <b>Dan Miggins</b><br>Irradiation = <b>23-OSU-01 (1A37-23)</b><br>J = <b>0.00155820 ± 0.00000132</b><br>FCT-NM = <b>28.201 ± 0.023 Ma</b> | Age Plateau      | 6.05062 ± 0.02392 ± 0.40%                             | 17.18 ± 0.07 ± 0.43% | 1.76<br>5%                       | 40.58<br>13                                | 0.125 ± 0.041 |
|                                                                                                                                                                                                                                                                                                                        |                  | Full External Error ± 0.89<br>Analytical Error ± 0.07 |                      | 1.82<br>1.3252                   | 2σ Confidence Limit<br>Error Magnification |               |
|                                                                                                                                                                                                                                                                                                                        | Total Fusion Age | 6.53602 ± 0.05306 ± 0.81%                             | 18.55 ± 0.15 ± 0.83% |                                  | 33                                         | 0.135 ± 0.000 |
|                                                                                                                                                                                                                                                                                                                        |                  | Full External Error ± 0.97<br>Analytical Error ± 0.15 |                      | ■ Defining a mini plateau at 41% |                                            |               |

| Normal Isochron |        | 39(k)/36(a) ± 2σ | 40(a+r)/36(a) ± 2σ | r.i.   |
|-----------------|--------|------------------|--------------------|--------|
| 23G08914        | 0.8 %  | 0.15 ± 0.00      | 298.91 ± 1.45      | 0.1562 |
| 23G08915        | 1.0 %  | 0.30 ± 0.00      | 301.31 ± 1.46      | 0.3882 |
| 23G08917        | 1.2 %  | 0.43 ± 0.00      | 303.09 ± 1.45      | 0.5357 |
| 23G08918        | 1.4 %  | 0.63 ± 0.01      | 304.87 ± 1.47      | 0.6028 |
| 23G08920        | 1.7 %  | 0.85 ± 0.01      | 306.68 ± 1.48      | 0.7105 |
| 23G08921        | 2.0 %  | 1.32 ± 0.01      | 310.84 ± 1.50      | 0.8194 |
| 23G08923        | 2.4 %  | 1.95 ± 0.01      | 315.67 ± 1.53      | 0.8847 |
| 23G08924        | 2.8 %  | 3.40 ± 0.02      | 324.67 ± 1.57      | 0.9508 |
| 23G08926        | 3.2 %  | 4.87 ± 0.03      | 334.74 ± 1.65      | 0.9492 |
| 23G08927        | 3.6 %  | 6.91 ± 0.04      | 348.28 ± 1.76      | 0.9458 |
| 23G08929        | 4.0 %  | 10.07 ± 0.05     | 368.42 ± 1.91      | 0.9542 |
| 23G08930        | 4.5 %  | 12.37 ± 0.07     | 380.70 ± 1.98      | 0.9586 |
| 23G08932        | 4.9 %  | 16.14 ± 0.09     | 402.43 ± 2.12      | 0.9645 |
| 23G08933        | 5.3 %  | 18.76 ± 0.10     | 417.09 ± 2.23      | 0.9662 |
| 23G08935        | 5.7 %  | 21.60 ± 0.12     | 435.34 ± 2.38      | 0.9655 |
| 23G08936        | 6.1 %  | 27.83 ± 0.17     | 472.83 ± 2.78      | 0.9627 |
| 23G08938        | 6.5 %  | 31.30 ± 0.20     | 493.38 ± 3.01      | 0.9585 |
| 23G08939        | 6.9 %  | 30.79 ± 0.20     | 488.48 ± 3.07      | 0.9631 |
| 23G08941        | 7.4 %  | ✓ 32.49 ± 0.21   | 497.18 ± 3.13      | 0.9651 |
| 23G08942        | 8.0 %  | ✓ 39.59 ± 0.28   | 539.17 ± 3.70      | 0.9682 |
| 23G08944        | 8.6 %  | ✓ 38.22 ± 0.28   | 529.58 ± 3.79      | 0.9685 |
| 23G08945        | 9.6 %  | ✓ 34.56 ± 0.22   | 507.17 ± 3.12      | 0.9702 |
| 23G08947        | 10.6 % | ✓ 37.29 ± 0.24   | 524.76 ± 3.36      | 0.9669 |
| 23G08948        | 12.0 % | ✓ 40.83 ± 0.30   | 546.15 ± 3.87      | 0.9657 |
| 23G08950        | 13.5 % | ✓ 48.29 ± 0.42   | 590.11 ± 5.03      | 0.9680 |
| 23G08951        | 15.0 % | ✓ 42.74 ± 0.36   | 557.23 ± 4.68      | 0.9620 |
| 23G08953        | 16.6 % | ✓ 48.29 ± 0.49   | 587.79 ± 5.96      | 0.9663 |
| 23G08954        | 18.2 % | ✓ 50.91 ± 0.61   | 600.43 ± 7.14      | 0.9598 |
| 23G08956        | 19.6 % | ✓ 50.27 ± 0.72   | 604.41 ± 8.64      | 0.9548 |
| 23G08957        | 21.5 % | ✓ 56.15 ± 0.94   | 640.33 ± 10.70     | 0.9595 |
| 23G08959        | 22.8 % | ✓ 70.64 ± 1.67   | 728.11 ± 17.21     | 0.9650 |
| 23G08960        | 24.5 % | 81.00 ± 2.24     | 780.02 ± 21.67     | 0.9706 |
| 23G08962        | 26.0 % | 96.16 ± 3.22     | 866.85 ± 29.19     | 0.9748 |

| Results         | 40(a)/36(a) ± 2σ                                                    | 40(r)/39(k) ± 2σ          | Age ± 2σ<br>(Ma)                                       | MSWD                                    |
|-----------------|---------------------------------------------------------------------|---------------------------|--------------------------------------------------------|-----------------------------------------|
| Normal Isochron | 303.27 ± 5.87 ± 1.94%                                               | 5.93584 ± 0.14480 ± 2.44% | 16.85 ± 0.41 ± 2.43%                                   | 1.65<br>8%                              |
|                 | Full External Error ± 0.97<br>Analytical Error ± 0.41               |                           |                                                        |                                         |
| Statistics      | 2σ Confidence Limit<br>Error Magnification<br>Number of Data Points | 1.85<br>1.2827<br>13      | Convergence<br>Number of Iterations<br>Calculated Line | 0.000038158902<br>16<br>Weighted York-2 |

| Degassing Patterns |        | 36Ar(a)<br>[fA] | %1σ  | 36Ar(c)<br>[fA] | %1σ  | 36Ar(ca)<br>[fA] | %1σ  | 36Ar(cl)<br>[fA] | %1σ    | 37Ar(ca)<br>[fA] | %1σ  | 38Ar(a)<br>[fA] | %1σ  | 38Ar(c)<br>[fA] | %1σ  | 38Ar(k)<br>[fA] | %1σ  | 38Ar(ca)<br>[fA] | %1σ  | 38Ar(cl)<br>[fA] | %1σ    | 39Ar(k)<br>[fA] | %1σ  | 39Ar(ca)<br>[fA] | %1σ  | 40Ar(r)<br>[fA] | %1σ    | 40Ar(a)<br>[fA] | %1σ  | 40Ar(c)<br>[fA] | %1σ  | 40Ar(k)<br>[fA] | %1σ  |
|--------------------|--------|-----------------|------|-----------------|------|------------------|------|------------------|--------|------------------|------|-----------------|------|-----------------|------|-----------------|------|------------------|------|------------------|--------|-----------------|------|------------------|------|-----------------|--------|-----------------|------|-----------------|------|-----------------|------|
| 23G08914           | 0.8 %  | 3.959139        | 0.24 | 0.0000000       | 0.00 | 0.0005627        | 0.90 | 0.0000000        | #####  | 2.0817           | 0.88 | 0.746298        | 0.29 | 0.0000000       | 0.00 | 0.0073465       | 1.53 | 0.0003747        | 9.67 | 0.0006477        | #####  | 0.60831         | 1.53 | 0.0013375        | 1.28 | 1.3773          | 226.23 | 1182.041        | 0.26 | 0.0000000       | 0.00 | 0.0003692       | 9.77 |
| 23G08915           | 1.0 %  | 5.463364        | 0.24 | 0.0000000       | 0.00 | 0.0014569        | 0.41 | 0.0000007        | 75.97  | 5.3898           | 0.37 | 1.029844        | 0.29 | 0.0000000       | 0.00 | 0.0196243       | 0.58 | 0.0009702        | 9.64 | 0.0126656        | 75.98  | 1.62493         | 0.57 | 0.0034630        | 0.99 | 14.9996         | 28.61  | 1631.142        | 0.26 | 0.0000000       | 0.00 | 0.0009863       | 9.67 |
| 23G08917           | 1.2 %  | 5.729398        | 0.24 | 0.0000000       | 0.00 | 0.0021774        | 0.33 | 0.0000005        | 95.28  | 8.0553           | 0.29 | 1.079992        | 0.29 | 0.0000000       | 0.00 | 0.0300345       | 0.39 | 0.0014500        | 9.63 | 0.0099718        | 95.29  | 2.48692         | 0.38 | 0.0051755        | 0.96 | 25.9698         | 17.21  | 1710.569        | 0.26 | 0.0000000       | 0.00 | 0.0015096       | 9.66 |
| 23G08918           | 1.4 %  | 4.637905        | 0.24 | 0.0000000       | 0.00 | 0.0024527        | 0.33 | 0.0000003        | 141.94 | 9.0740           | 0.28 | 0.874245        | 0.29 | 0.0000000       | 0.00 | 0.0353235       | 0.33 | 0.0016333        | 9.63 | 0.0064304        | 141.94 | 2.92486         | 0.32 | 0.0058301        | 0.96 | 29.2796         | 12.41  | 1384.693        | 0.26 | 0.0000000       | 0.00 | 0.0017754       | 9.66 |
| 23G08920           | 1.7 %  | 4.385322        | 0.24 | 0.0000000       | 0.00 | 0.0030646        | 0.30 | 0.0000000        | 0.00   | 11.3377          | 0.25 | 0.826633        | 0.29 | 0.0000000       | 0.00 | 0.0448040       | 0.25 | 0.0020408        | 9.63 | 0.0000000        | 0.00   | 3.70986         | 0.24 | 0.0072845        | 0.95 | 35.6159         | 9.64   | 1309.282        | 0.26 | 0.0000000       | 0.00 | 0.0022519       | 9.65 |
| 23G08921           | 2.0 %  | 4.505967        | 0.24 | 0.0000000       | 0.00 | 0.0047689        | 0.28 | 0.0000000        | 0.00   | 17.6431          | 0.22 | 0.849375        | 0.29 | 0.0000000       | 0.00 | 0.0716590       | 0.19 | 0.0031758        | 9.63 | 0.0000000        | 0.00   | 5.93351         | 0.17 | 0.0113357        | 0.95 | 55.3111         | 6.40   | 1345.302        | 0.26 | 0.0000000       | 0.00 | 0.0036016       | 9.65 |
| 23G08923           | 2.4 %  | 4.202917        | 0.24 | 0.0000000       | 0.00 | 0.0065001        | 0.27 | 0.0000000        | 0.00   | 24.0477          | 0.21 | 0.792250        | 0.29 | 0.0000000       | 0.00 | 0.0992064       | 0.16 | 0.0043286        | 9.63 | 0.0000000        | 0.00   | 8.21449         | 0.13 | 0.0154507        | 0.94 | 71.9314         | 4.60   | 1254.823        | 0.26 | 0.0000000       | 0.00 | 0.0049862       | 9.65 |
| 23G08924           | 2.8 %  | 5.342533        | 0.24 | 0.0000000       | 0.00 | 0.0143372        | 0.26 | 0.0000000        | 0.00   | 53.0420          | 0.20 | 1.007067        | 0.29 | 0.0000000       | 0.00 | 0.2196792       | 0.12 | 0.0095476        | 9.63 | 0.0000000        | 0.00   | 18.18988        | 0.08 | 0.0340795        | 0.94 | 139.5132        | 3.01   | 1595.067        | 0.26 | 0.0000000       | 0.00 | 0.0110413       | 9.65 |
| 23G08926           | 3.2 %  | 3.658079        | 0.25 | 0.0000000       | 0.00 | 0.0138281        | 0.26 | 0.0000000        | 0.00   | 51.1584          | 0.20 | 0.689548        | 0.29 | 0.0000000       | 0.00 | 0.2153642       | 0.12 | 0.0092085        | 9.63 | 0.0000000        | 0.00   | 17.83259        | 0.08 | 0.0328692        | 0.94 | 132.3542        | 2.20   | 1092.156        | 0.27 | 0.0000000       | 0.00 | 0.0108244       | 9.65 |
| 23G08927           | 3.6 %  | 2.205435        | 0.25 | 0.0000000       | 0.00 | 0.0114785        | 0.26 | 0.0000000        | 0.00   | 42.4656          | 0.20 | 0.415724        | 0.30 | 0.0000000       | 0.00 | 0.1840556       | 0.12 | 0.0076438        | 9.63 | 0.0000000        | 0.00   | 15.24017        | 0.09 | 0.0272842        | 0.94 | 109.6560        | 1.64   | 658.455         | 0.27 | 0.0000000       | 0.00 | 0.0092508       | 9.65 |
| 23G08929           | 4.0 %  | 1.918974        | 0.26 | 0.0000000       | 0.00 | 0.0142962        | 0.26 | 0.0000000        | 0.00   | 52.8902          | 0.20 | 0.361727        | 0.30 | 0.0000000       | 0.00 | 0.2334447       | 0.12 | 0.0095202        | 9.63 | 0.0000000        | 0.00   | 19.32969        | 0.08 | 0.0339820        | 0.94 | 134.0676        | 1.19   | 572.929         | 0.28 | 0.0000000       | 0.00 | 0.0117331       | 9.65 |
| 23G08930           | 4.5 %  | 1.843212        | 0.26 | 0.0000000       | 0.00 | 0.0161604        | 0.26 | 0.0000000        | 0.00   | 59.7869          | 0.20 | 0.347446        | 0.30 | 0.0000000       | 0.00 | 0.2753135       | 0.12 | 0.0107616        | 9.63 | 0.0000000        | 0.00   | 22.79651        | 0.08 | 0.0384131        | 0.94 | 151.3926        | 1.02   | 550.309         | 0.28 | 0.0000000       | 0.00 | 0.0138375       | 9.65 |
| 23G08932           | 4.9 %  | 1.633771        | 0.26 | 0.0000000       | 0.00 | 0.0179208        | 0.26 | 0.0000000        | 0.00   | 66.2998          | 0.20 | 0.307966        | 0.31 | 0.0000000       | 0.00 | 0.3184653       | 0.11 | 0.0119340        | 9.63 | 0.0000000        | 0.00   | 26.36957        | 0.07 | 0.0425976        | 0.94 | 169.6984        | 0.82   | 487.779         | 0.28 | 0.0000000       | 0.00 | 0.0160063       | 9.65 |
| 23G08933           | 5.3 %  | 1.450183        | 0.27 | 0.0000000       | 0.00 | 0.0175698        | 0.26 | 0.0000000        | 0.00   | 65.0012          | 0.20 | 0.273359        | 0.31 | 0.0000000       | 0.00 | 0.3285233       | 0.11 | 0.0117002        | 9.63 | 0.0000000        | 0.00   | 27.20240        | 0.07 | 0.0417633        | 0.94 | 171.8932        | 0.72   | 432.967         | 0.29 | 0.0000000       | 0.00 | 0.0165119       | 9.65 |
| 23G08935           | 5.7 %  | 1.187505        | 0.27 | 0.0000000       | 0.00 | 0.0156310        | 0.26 | 0.0000000        | 0.00   | 57.8282          | 0.20 | 0.223845        | 0.32 | 0.0000000       | 0.00 | 0.3097563       | 0.11 | 0.0104091        | 9.63 | 0.0000000        | 0.00   | 25.64845        | 0.07 | 0.0371546        | 0.94 | 162.4234        | 0.64   | 354.542         | 0.29 | 0.0000000       | 0.00 | 0.0155686       | 9.65 |
| 23G08936           | 6.1 %  | 0.749300        | 0.29 | 0.0000000       | 0.00 | 0.0118829        | 0.26 | 0.0000000        | 0.00   | 43.9619          | 0.20 | 0.141243        | 0.33 | 0.0000000       | 0.00 | 0.2518265       | 0.12 | 0.0079131        | 9.63 | 0.0000000        | 0.00   | 20.85174        | 0.08 | 0.0282455        | 0.94 | 130.5796        | 0.54   | 223.711         | 0.31 | 0.0000000       | 0.00 | 0.0126570       | 9.65 |
| 23G08938           | 6.5 %  | 0.590100        | 0.30 | 0.0000000       | 0.00 | 0.0100482        | 0.26 | 0.0000000        | 0.00   | 37.1743          | 0.20 | 0.111234        | 0.34 | 0.0000000       | 0.00 | 0.2230846       | 0.12 | 0.0066914        | 9.63 | 0.0000000        | 0.00   | 18.47186        | 0.08 | 0.0238845        | 0.94 | 114.9607        | 0.50   | 176.180         | 0.32 | 0.0000000       | 0.00 | 0.0112124       | 9.65 |
| 23G08939           | 6.9 %  | 0.622182        | 0.31 | 0.0000000       | 0.00 | 0.0102289        | 0.26 | 0.0000000        | 0.00   | 37.8429          | 0.20 | 0.117281        | 0.35 | 0.0000000       | 0.00 | 0.2313882       | 0.12 | 0.0068117        | 9.63 | 0.0000000        | 0.00   | 19.15941        | 0.08 | 0.0243141        | 0.94 | 118.1649        | 0.52   | 185.759         | 0.33 | 0.0000000       | 0.00 | 0.0116298       | 9.65 |
| 23G08941           | 7.4 %  | ✓ 0.610734      | 0.31 | 0.0000000       | 0.00 | 0.0102082        | 0.26 | 0.0000000        | 0.00   | 37.7662          | 0.20 | 0.115123        | 0.35 | 0.0000000       | 0.00 | 0.2396145       | 0.12 | 0.0067979        | 9.63 | 0.0000000        | 0.00   | 19.84056        | 0.08 | 0.0242648        | 0.94 | 121.3054        | 0.50   | 182.341         | 0.33 | 0.0000000       | 0.00 | 0.0120432       | 9.65 |
| 23G08942           | 8.0 %  | ✓ 0.497005      | 0.34 | 0.0000000       | 0.00 | 0.0099860        | 0.27 | 0.0000000        | 0.00   | 36.9441          | 0.20 | 0.093685        | 0.38 | 0.0000000       | 0.00 | 0.2376071       | 0.12 | 0.0066499        | 9.63 | 0.0000000        | 0.00   | 19.67434        | 0.08 | 0.0237366        | 0.94 | 119.5844        | 0.45   | 148.386         | 0.36 | 0.0000000       | 0.00 | 0.0119423       | 9.65 |
| 23G08944           | 8.6 %  | ✓ 0.462054      | 0.36 | 0.0000000       | 0.00 | 0.0089676        | 0.27 | 0.0000000        | 0.00   | 33.1765          | 0.20 | 0.087097        | 0.39 | 0.0000000       | 0.00 | 0.2132973       | 0.12 | 0.0059718        | 9.63 | 0.0000000        | 0.00   | 17.66144        | 0.08 | 0.0213159        | 0.94 | 106.7424        | 0.49   | 137.951         | 0.37 | 0.0000000       | 0.00 | 0.0107205       | 9.65 |
| 23G08945           | 9.6 %  | ✓ 0.715118      | 0.31 | 0.0000000       | 0.00 | 0.0173011        | 0.26 | 0.0000000        | 0.00   | 64.0071          | 0.20 | 0.134800        | 0.34 | 0.0000000       | 0.00 | 0.2984857       | 0.11 | 0.0115213        | 9.63 | 0.0000000        | 0.00   | 24.71522        | 0.07 | 0.0411246        | 0.94 | 149.1789        | 0.47   | 213.506         | 0.32 | 0.0000000       | 0.00 | 0.0150021       | 9.65 |
| 23G08947           | 10.6 % | ✓ 0.536364      | 0.32 | 0.0000000       | 0.00 | 0.0140156        | 0.26 | 0.0000000        | 0.00   | 51.8519          | 0.20 | 0.101105        | 0.36 | 0.0000000       | 0.00 | 0.2415528       | 0.12 | 0.0093333        | 9.63 | 0.0000000        | 0.00   | 20.00106        | 0.08 | 0.0333148        | 0.94 | 121.3275        | 0.45   | 160.137         | 0.33 | 0.0000000       | 0.00 | 0.0121406       | 9.65 |
| 23G08948           | 12.0 % | ✓ 0.436389      | 0.35 | 0.0000000       | 0.00 | 0.0140338        | 0.26 | 0.0000000        | 0.00   | 51.9192          | 0.20 | 0.082259        | 0.39 | 0.0000000       | 0.00 | 0.2152020       | 0.12 | 0.0093455        | 9.63 | 0.0000000        | 0.00   | 17.81916        | 0.08 | 0.0333581        | 0.94 | 108.0469        | 0.45   | 130.288         | 0.37 | 0.0000000       | 0.00 | 0.0108162       | 9.65 |
| 23G08950           | 13.5 % | ✓ 0.296728      | 0.42 | 0.0000000       | 0.00 | 0.0138208        | 0.26 | 0.0000000        | 0.00   | 51.1314          | 0.20 | 0.055933        | 0.45 | 0.0000000       | 0.00 | 0.1730486       | 0.13 | 0.0092037        | 9.63 | 0.0000000        | 0.00   | 14.32877        | 0.09 | 0.0328519        | 0.94 | 86.5099         | 0.46   | 88.591          | 0.43 | 0.0000000       | 0.00 | 0.0086976       | 9.65 |
| 23G08951           | 15.0 % | ✓ 0.288840      | 0.42 | 0.0000000       | 0.00 | 0.0155317        | 0.26 | 0.0000000        | 0.00   | 57.4608          | 0.20 | 0.054446        | 0.44 | 0.0000000       | 0.00 | 0.1490873       | 0.13 | 0.0103429        | 9.63 | 0.0000000        | 0.00   | 12.34473        | 0.10 | 0.0369186        | 0.94 | 74.7128         | 0.51   | 86.236          | 0.43 | 0.0000000       | 0.00 | 0.0074933       | 9.65 |
| 23G08953           | 16.6 % | ✓ 0.213153      | 0.50 | 0.0000000       | 0.00 | 0.0202045        | 0.26 | 0.0000000        | 0.00   | 74.7485          | 0.20 | 0.040179        | 0.52 | 0.0000000       | 0.00 | 0.1242985       | 0.14 | 0.0134547        | 9.63 | 0.0000000        | 0.00   | 10.29216        | 0.10 | 0.0480259        | 0.94 | 61.6512         | 0.55   | 63.639          | 0.51 | 0.0000000       | 0.00 | 0.0062473       | 9.65 |
| 23G08954           | 18.2 % | ✓ 0.156513      | 0.58 | 0.0000000       | 0.00 | 0.0182567        | 0.26 | 0.0000000        | 0.00   | 67.5422          | 0.20 | 0.029503        | 0.61 | 0.0000000       | 0.00 | 0.0962345       | 0.16 | 0.0121576        | 9.63 | 0.0000000        | 0.00   | 7.96841         | 0.13 | 0.0433958        | 0.94 | 47.2463         | 0.63   | 46.729          | 0.59 | 0.0000000       | 0.00 | 0.0048368       | 9.65 |
| 23G08956           | 19.6 % | ✓ 0.122019      | 0.70 | 0.0000000       | 0.00 | 0.0132399        | 0.26 | 0.0000000        | 0.00   | 48.9822          | 0.20 | 0.023001        | 0.72 | 0.0000000       | 0.00 | 0.0740723       | 0.19 | 0.0088168        | 9.63 | 0.0000000        | 0.00   | 6.13334         | 0.17 | 0.0314711        | 0.94 | 37.3190         | 0.74   | 36.430          | 0.71 | 0.0000000       | 0.00 | 0.0037229       | 9.65 |
| 23G08957           | 21.5 % | ✓ 0.098421      | 0.82 | 0.0000000       | 0.00 | 0.0135833        | 0.26 | 0.0000001        | 355.90 | 50.2527          | 0.20 | 0.018552        | 0.84 | 0.0000000       | 0.00 | 0.0667374       | 0.20 | 0.0090455        | 9.63 | 0.0025109        | 355.90 | 5.52599         | 0.18 | 0.0322874        | 0.94 | 33.6373         | 0.78   | 29.384          | 0.83 | 0.0000000       | 0.00 | 0.0033543       | 9.65 |
| 23G08959           | 22.8 % | ✓ 0.063728      | 1.16 | 0.0000000       | 0.00 | 0.0131218        | 0.26 | 0.0000000        | 0.00   | 48.5453          | 0.20 | 0.012013        | 1.17 | 0.0000000       | 0.00 | 0.0543677       | 0.24 | 0.0087382        | 9.63 | 0.0000000        | 0.00   | 4.50176         | 0.22 | 0.0311904        | 0.94 | 27.3741         | 0.89   | 19.             |      |                 |      |                 |      |

| Additional Parameters |        | 40Ar/39Ar   | 1σ        | 37Ar/39Ar | 1σ       | 36Ar/39Ar | 1σ       | Time (days) | 37Ar (decay) | 39Ar (decay) | 40Ar (moles) |
|-----------------------|--------|-------------|-----------|-----------|----------|-----------|----------|-------------|--------------|--------------|--------------|
| 23G08914              | 0.8 %  | 1941.166003 | 29.624321 | 3.414683  | 0.060231 | 6.495116  | 0.100359 | 32.310      | 1.897739     | 1.00022889   | 5.053E-11    |
| 23G08915              | 1.0 %  | 1010.897798 | 5.782013  | 3.309903  | 0.022634 | 3.355952  | 0.020835 | 32.317      | 1.898000     | 1.00022894   | 7.029E-11    |
| 23G08917              | 1.2 %  | 696.820671  | 2.624822  | 3.232357  | 0.015310 | 2.299906  | 0.010265 | 32.331      | 1.898520     | 1.00022904   | 7.415E-11    |
| 23G08918              | 1.4 %  | 482.471883  | 1.532917  | 3.096205  | 0.013176 | 1.583368  | 0.006309 | 32.338      | 1.898781     | 1.00022909   | 6.038E-11    |
| 23G08920              | 1.7 %  | 361.809799  | 0.860302  | 3.050121  | 0.010515 | 1.180579  | 0.003992 | 32.353      | 1.899328     | 1.00022919   | 5.743E-11    |
| 23G08921              | 2.0 %  | 235.601664  | 0.397488  | 2.967791  | 0.008186 | 0.758764  | 0.002235 | 32.360      | 1.899588     | 1.00022924   | 5.981E-11    |
| 23G08923              | 2.4 %  | 161.211304  | 0.205146  | 2.921981  | 0.007231 | 0.511476  | 0.001397 | 32.374      | 1.900110     | 1.00022934   | 5.665E-11    |
| 23G08924              | 2.8 %  | 95.181897   | 0.074851  | 2.910563  | 0.006230 | 0.293947  | 0.000746 | 32.381      | 1.900370     | 1.00022939   | 7.407E-11    |
| 23G08926              | 3.2 %  | 68.541269   | 0.055706  | 2.863535  | 0.006186 | 0.205531  | 0.000530 | 32.394      | 1.900892     | 1.00022948   | 5.229E-11    |
| 23G08927              | 3.6 %  | 50.310922   | 0.043362  | 2.781447  | 0.006084 | 0.145205  | 0.000384 | 32.402      | 1.901178     | 1.00022954   | 3.280E-11    |
| 23G08929              | 4.0 %  | 36.512094   | 0.029450  | 2.731414  | 0.005865 | 0.099840  | 0.000268 | 32.416      | 1.901700     | 1.00022964   | 3.019E-11    |
| 23G08930              | 4.5 %  | 30.729941   | 0.023623  | 2.618223  | 0.005549 | 0.081427  | 0.000218 | 32.423      | 1.901961     | 1.00022968   | 2.996E-11    |
| 23G08932              | 4.9 %  | 24.893568   | 0.017867  | 2.510198  | 0.005270 | 0.062535  | 0.000168 | 32.437      | 1.902483     | 1.00022978   | 2.807E-11    |
| 23G08933              | 5.3 %  | 22.202055   | 0.015734  | 2.385876  | 0.005000 | 0.053874  | 0.000147 | 32.444      | 1.902770     | 1.00022984   | 2.583E-11    |
| 23G08935              | 5.7 %  | 20.127248   | 0.014752  | 2.251387  | 0.004745 | 0.046841  | 0.000130 | 32.458      | 1.903292     | 1.00022993   | 2.208E-11    |
| 23G08936              | 6.1 %  | 16.968557   | 0.013872  | 2.105456  | 0.004522 | 0.036455  | 0.000109 | 32.465      | 1.903553     | 1.00022998   | 1.513E-11    |
| 23G08938              | 6.5 %  | 15.741582   | 0.014100  | 2.009887  | 0.004394 | 0.032448  | 0.000100 | 32.479      | 1.904075     | 1.00023008   | 1.243E-11    |
| 23G08939              | 6.9 %  | 15.843385   | 0.013737  | 1.972658  | 0.004298 | 0.032966  | 0.000105 | 32.486      | 1.904336     | 1.00023013   | 1.298E-11    |
| 23G08941              | 7.4 %  | ✓ 15.286219 | 0.012919  | 1.901157  | 0.004124 | 0.031258  | 0.000099 | 32.501      | 1.904885     | 1.00023023   | 1.297E-11    |
| 23G08942              | 8.0 %  | ✓ 13.604481 | 0.011933  | 1.875518  | 0.004099 | 0.025738  | 0.000088 | 32.508      | 1.905146     | 1.00023028   | 1.144E-11    |
| 23G08944              | 8.6 %  | ✓ 13.838556 | 0.012565  | 1.876208  | 0.004129 | 0.026637  | 0.000095 | 32.522      | 1.905669     | 1.00023038   | 1.045E-11    |
| 23G08945              | 9.6 %  | ✓ 14.650777 | 0.011136  | 2.585484  | 0.005457 | 0.029585  | 0.000091 | 32.528      | 1.905931     | 1.00023043   | 1.549E-11    |
| 23G08947              | 10.6 % | ✓ 14.049683 | 0.011722  | 2.588145  | 0.005521 | 0.027472  | 0.000088 | 32.543      | 1.906480     | 1.00023053   | 1.202E-11    |
| 23G08948              | 12.0 % | ✓ 13.350835 | 0.012533  | 2.908232  | 0.006291 | 0.025230  | 0.000089 | 32.550      | 1.906741     | 1.00023058   | 1.018E-11    |
| 23G08950              | 13.5 % | ✓ 12.192893 | 0.013228  | 3.560282  | 0.007827 | 0.021624  | 0.000089 | 32.564      | 1.907264     | 1.00023068   | 7.477E-12    |
| 23G08951              | 15.0 % | ✓ 12.999585 | 0.015156  | 4.640804  | 0.010286 | 0.024582  | 0.000100 | 32.571      | 1.907526     | 1.00023073   | 6.873E-12    |
| 23G08953              | 16.6 % | ✓ 12.117420 | 0.015946  | 7.228931  | 0.016110 | 0.022568  | 0.000106 | 32.585      | 1.908075     | 1.00023083   | 5.350E-12    |
| 23G08954              | 18.2 % | ✓ 11.730163 | 0.019763  | 8.430332  | 0.019965 | 0.021814  | 0.000117 | 32.592      | 1.908337     | 1.00023088   | 4.013E-12    |
| 23G08956              | 19.6 % | ✓ 11.963501 | 0.025735  | 7.945454  | 0.020586 | 0.021940  | 0.000143 | 32.606      | 1.908861     | 1.00023098   | 3.149E-12    |
| 23G08957              | 21.5 % | ✓ 11.338972 | 0.026927  | 9.041069  | 0.023957 | 0.020151  | 0.000149 | 32.613      | 1.909123     | 1.00023103   | 2.691E-12    |
| 23G08959              | 22.8 % | ✓ 10.236908 | 0.031906  | 10.709439 | 0.032031 | 0.016953  | 0.000167 | 32.627      | 1.909646     | 1.00023113   | 1.981E-12    |
| 23G08960              | 24.5 % | 9.556442    | 0.032011  | 11.925303 | 0.035805 | 0.015474  | 0.000171 | 32.635      | 1.909935     | 1.00023118   | 1.740E-12    |
| 23G08962              | 26.0 % | 8.940996    | 0.033595  | 12.819241 | 0.040225 | 0.013779  | 0.000174 | 32.649      | 1.910459     | 1.00023128   | 1.506E-12    |

| Procedure Blanks |        | 36Ar ± 1σ (SE) [fA]   | 37Ar ± 1σ (SE) [fA]   | 38Ar ± 1σ (SE) [fA]   | 39Ar ± 1σ (SE) [fA]   | 40Ar ± 1σ (SE) [fA]   |
|------------------|--------|-----------------------|-----------------------|-----------------------|-----------------------|-----------------------|
| 23G08914         | 0.8 %  | 0.0108724 ± 0.0005105 | 0.0102721 ± 0.0063665 | 0.0031150 ± 0.0061431 | 0.0086461 ± 0.0063148 | 3.2246006 ± 0.0998981 |
| 23G08915         | 1.0 %  | 0.0109901 ± 0.0005105 | 0.0094961 ± 0.0063665 | 0.0021275 ± 0.0061431 | 0.0106853 ± 0.0063148 | 3.2490629 ± 0.0998981 |
| 23G08917         | 1.2 %  | 0.0111674 ± 0.0005105 | 0.0079120 ± 0.0063665 | 0.0005910 ± 0.0061431 | 0.0142561 ± 0.0063148 | 3.2866811 ± 0.0998981 |
| 23G08918         | 1.4 %  | 0.0112305 ± 0.0005105 | 0.0071175 ± 0.0063665 | 0.0000188 ± 0.0061431 | 0.0157863 ± 0.0063148 | 3.3004984 ± 0.0998981 |
| 23G08920         | 1.7 %  | 0.0113162 ± 0.0005105 | 0.0054759 ± 0.0063665 | 0.0008186 ± 0.0061431 | 0.0184474 ± 0.0063148 | 3.3203873 ± 0.0998981 |
| 23G08921         | 2.0 %  | 0.0113379 ± 0.0005105 | 0.0047175 ± 0.0063665 | 0.0010663 ± 0.0061431 | 0.0194544 ± 0.0063148 | 3.3261160 ± 0.0998981 |
| 23G08923         | 2.4 %  | 0.0113515 ± 0.0005105 | 0.0032667 ± 0.0063665 | 0.0013197 ± 0.0061431 | 0.0209767 ± 0.0063148 | 3.3316695 ± 0.0998981 |
| 23G08924         | 2.8 %  | 0.0113460 ± 0.0005105 | 0.0025808 ± 0.0063665 | 0.0013444 ± 0.0061431 | 0.0214987 ± 0.0063148 | 3.3319739 ± 0.0998981 |
| 23G08926         | 3.2 %  | 0.0113159 ± 0.0005105 | 0.0012996 ± 0.0063665 | 0.0012335 ± 0.0061431 | 0.0220856 ± 0.0063148 | 3.3287250 ± 0.0998981 |
| 23G08927         | 3.6 %  | 0.0112911 ± 0.0005105 | 0.0006500 ± 0.0063665 | 0.0011008 ± 0.0061431 | 0.0221612 ± 0.0063148 | 3.3251994 ± 0.0998981 |
| 23G08929         | 4.0 %  | 0.0112358 ± 0.0005105 | 0.0004281 ± 0.0063665 | 0.0007700 ± 0.0061431 | 0.0218823 ± 0.0063148 | 3.3165342 ± 0.0998981 |
| 23G08930         | 4.5 %  | 0.0112050 ± 0.0005105 | 0.0009177 ± 0.0063665 | 0.0005759 ± 0.0061431 | 0.0215566 ± 0.0063148 | 3.3114163 ± 0.0998981 |
| 23G08932         | 4.9 %  | 0.0111406 ± 0.0005105 | 0.0018042 ± 0.0063665 | 0.0001633 ± 0.0061431 | 0.0205741 ± 0.0063148 | 3.3002423 ± 0.0998981 |
| 23G08933         | 5.3 %  | 0.0111050 ± 0.0005105 | 0.0022436 ± 0.0063665 | 0.0000634 ± 0.0061431 | 0.0198675 ± 0.0063148 | 3.2938052 ± 0.0998981 |
| 23G08935         | 5.7 %  | 0.0110429 ± 0.0005105 | 0.0029704 ± 0.0063665 | 0.0004464 ± 0.0061431 | 0.0183350 ± 0.0063148 | 3.2819984 ± 0.0998981 |
| 23G08936         | 6.1 %  | 0.0110138 ± 0.0005105 | 0.0033066 ± 0.0063665 | 0.0006135 ± 0.0061431 | 0.0174721 ± 0.0063148 | 3.2761645 ± 0.0998981 |
| 23G08938         | 6.5 %  | 0.0109610 ± 0.0005105 | 0.0039481 ± 0.0063665 | 0.0008775 ± 0.0061431 | 0.0156152 ± 0.0063148 | 3.2648138 ± 0.0998981 |
| 23G08939         | 6.9 %  | 0.0109376 ± 0.0005105 | 0.0042643 ± 0.0063665 | 0.0009667 ± 0.0061431 | 0.0146479 ± 0.0063148 | 3.2593232 ± 0.0998981 |
| 23G08941         | 7.4 %  | 0.0108956 ± 0.0005105 | 0.0049541 ± 0.0063665 | 0.0010431 ± 0.0061431 | 0.0126117 ± 0.0063148 | 3.2481409 ± 0.0998981 |
| 23G08942         | 8.0 %  | 0.0108789 ± 0.0005105 | 0.0053102 ± 0.0063665 | 0.0010209 ± 0.0061431 | 0.0116724 ± 0.0063148 | 3.2429132 ± 0.0998981 |
| 23G08944         | 8.6 %  | 0.0108509 ± 0.0005105 | 0.0061174 ± 0.0063665 | 0.0008524 ± 0.0061431 | 0.0099360 ± 0.0063148 | 3.2323653 ± 0.0998981 |
| 23G08945         | 9.6 %  | 0.0108391 ± 0.0005105 | 0.0065865 ± 0.0063665 | 0.0007029 ± 0.0061431 | 0.0091737 ± 0.0063148 | 3.2268895 ± 0.0998981 |
| 23G08947         | 10.6 % | 0.0108171 ± 0.0005105 | 0.0077688 ± 0.0063665 | 0.0002417 ± 0.0061431 | 0.0079047 ± 0.0063148 | 3.2143960 ± 0.0998981 |
| 23G08948         | 12.0 % | 0.0108070 ± 0.0005105 | 0.0084484 ± 0.0063665 | 0.0000489 ± 0.0061431 | 0.0074995 ± 0.0063148 | 3.2077121 ± 0.0998981 |
| 23G08950         | 13.5 % | 0.0107842 ± 0.0005105 | 0.0100929 ± 0.0063665 | 0.0007674 ± 0.0061431 | 0.0071787 ± 0.0063148 | 3.1921779 ± 0.0998981 |
| 23G08951         | 15.0 % | 0.0107702 ± 0.0005105 | 0.0110828 ± 0.0063665 | 0.0011938 ± 0.0061431 | 0.0073059 ± 0.0063148 | 3.1829902 ± 0.0998981 |
| 23G08953         | 16.6 % | 0.0107305 ± 0.0005105 | 0.0135997 ± 0.0063665 | 0.0022285 ± 0.0061431 | 0.0083213 ± 0.0063148 | 3.1595534 ± 0.0998981 |
| 23G08954         | 18.2 % | 0.0107048 ± 0.0005105 | 0.0150371 ± 0.0063665 | 0.0027837 ± 0.0061431 | 0.0092109 ± 0.0063148 | 3.1459666 ± 0.0998981 |
| 23G08956         | 19.6 % | 0.0106350 ± 0.0005105 | 0.0184514 ± 0.0063665 | 0.0040030 ± 0.0061431 | 0.0119006 ± 0.0063148 | 3.1128884 ± 0.0998981 |
| 23G08957         | 21.5 % | 0.0105885 ± 0.0005105 | 0.0204605 ± 0.0063665 | 0.0046614 ± 0.0061431 | 0.0137517 ± 0.0063148 | 3.0928776 ± 0.0998981 |
| 23G08959         | 22.8 % | 0.0104664 ± 0.0005105 | 0.0251668 ± 0.0063665 | 0.0060584 ± 0.0061431 | 0.0185985 ± 0.0063148 | 3.0445021 ± 0.0998981 |
| 23G08960         | 24.5 % | 0.0103794 ± 0.0005105 | 0.0281878 ± 0.0063665 | 0.0068631 ± 0.0061431 | 0.0219788 ± 0.0063148 | 3.0124376 ± 0.0998981 |
| 23G08962         | 26.0 % | 0.0101775 ± 0.0005105 | 0.0345654 ± 0.0063665 | 0.0083678 ± 0.0061431 | 0.0295742 ± 0.0063148 | 2.9424888 ± 0.0998981 |

| Intercept<br>Values |        | 36Ar ± 1σ (SE)<br>[fA] | r2     | Regression<br>(type,n) | 37Ar ± 1σ (SE)<br>[fA] | r2     | Regression<br>(type,n) | 38Ar ± 1σ (SE)<br>[fA] | r2     | Regression<br>(type,n) | 39Ar ± 1σ (SE)<br>[fA] | r2     | Regression<br>(type,n) | 40Ar ± 1σ (SE)<br>[fA] | r2     | Regression<br>(type,n) |
|---------------------|--------|------------------------|--------|------------------------|------------------------|--------|------------------------|------------------------|--------|------------------------|------------------------|--------|------------------------|------------------------|--------|------------------------|
| 23G08914            | 0.8 %  | 3.8569709 ± 0.0027559  | 0.9944 | EXP 146 of 150         | 1.065786 ± 0.006757    | 0.6415 | EXP 150 of 150         | 0.7481843 ± 0.0066815  | 0.4697 | EXP 150 of 150         | 0.6142807 ± 0.0067401  | 0.3666 | EXP 150 of 150         | 1186.642805 ± 0.050116 | 1.0000 | EXP 150 of 150         |
| 23G08915            | 1.0 %  | 5.3190270 ± 0.0037460  | 0.9943 | EXP 150 of 150         | 2.776148 ± 0.006250    | 0.9422 | EXP 150 of 150         | 1.0517119 ± 0.0064980  | 0.6506 | EXP 149 of 150         | 1.6283755 ± 0.0066997  | 0.0077 | EXP 150 of 150         | 1649.391731 ± 0.058955 | 1.0000 | EXP 150 of 150         |
| 23G08917            | 1.2 %  | 5.5783054 ± 0.0035317  | 0.9955 | EXP 150 of 150         | 4.154204 ± 0.006051    | 0.9761 | EXP 149 of 150         | 1.1077770 ± 0.0062443  | 0.6884 | EXP 150 of 150         | 2.4899615 ± 0.0067159  | 0.5419 | EXP 150 of 150         | 1739.827137 ± 0.057405 | 1.0000 | EXP 149 of 150         |
| 23G08918            | 1.4 %  | 4.5184570 ± 0.0030179  | 0.9949 | EXP 150 of 150         | 4.680699 ± 0.007231    | 0.9728 | EXP 150 of 150         | 0.9059813 ± 0.0059964  | 0.6408 | EXP 150 of 150         | 2.9272040 ± 0.0065517  | 0.7894 | EXP 150 of 150         | 1417.274664 ± 0.053684 | 1.0000 | EXP 150 of 150         |
| 23G08920            | 1.7 %  | 4.2738006 ± 0.0028472  | 0.9952 | EXP 147 of 150         | 5.850147 ± 0.006567    | 0.9861 | EXP 150 of 150         | 0.8418316 ± 0.0064525  | 0.5209 | EXP 150 of 150         | 3.7111528 ± 0.0057240  | 0.9378 | EXP 146 of 150         | 1348.220327 ± 0.050540 | 1.0000 | EXP 150 of 150         |
| 23G08921            | 2.0 %  | 4.3926615 ± 0.0030813  | 0.9946 | EXP 150 of 150         | 9.106174 ± 0.006333    | 0.9948 | EXP 149 of 150         | 0.9012237 ± 0.0066282  | 0.5587 | EXP 150 of 150         | 5.9252144 ± 0.0069296  | 0.9726 | EXP 150 of 150         | 1403.942346 ± 0.052971 | 1.0000 | EXP 149 of 150         |
| 23G08923            | 2.4 %  | 4.1000010 ± 0.0029056  | 0.9944 | EXP 149 of 150         | 12.411588 ± 0.008334   | 0.9950 | EXP 150 of 150         | 0.8634178 ± 0.0062601  | 0.5343 | EXP 150 of 150         | 8.1968016 ± 0.0068211  | 0.9886 | EXP 150 of 150         | 1330.090907 ± 0.047073 | 1.0000 | EXP 149 of 150         |
| 23G08924            | 2.8 %  | 5.2145284 ± 0.0036270  | 0.9945 | EXP 150 of 150         | 27.377058 ± 0.009287   | 0.9987 | EXP 150 of 150         | 1.1841097 ± 0.0061364  | 0.7103 | EXP 150 of 150         | 18.1256273 ± 0.0075123 | 0.9977 | EXP 148 of 150         | 1737.922834 ± 0.066704 | 1.0000 | EXP 150 of 150         |
| 23G08926            | 3.2 %  | 3.5778765 ± 0.0028901  | 0.9926 | EXP 150 of 150         | 26.398799 ± 0.010449   | 0.9983 | EXP 150 of 150         | 0.8867769 ± 0.0071623  | 0.4877 | EXP 150 of 150         | 17.7700696 ± 0.0080579 | 0.9973 | EXP 150 of 150         | 1227.849851 ± 0.045654 | 1.0000 | EXP 146 of 150         |
| 23G08927            | 3.6 %  | 2.1646014 ± 0.0020414  | 0.9896 | EXP 150 of 150         | 21.910283 ± 0.009216   | 0.9980 | EXP 150 of 150         | 0.5883541 ± 0.0055417  | 0.4848 | EXP 149 of 150         | 15.1892276 ± 0.0072734 | 0.9970 | EXP 150 of 150         | 771.445074 ± 0.040785  | 1.0000 | EXP 150 of 150         |
| 23G08929            | 4.0 %  | 1.8890408 ± 0.0020320  | 0.9857 | EXP 150 of 150         | 27.282637 ± 0.009760   | 0.9986 | EXP 150 of 150         | 0.5766642 ± 0.0061821  | 0.3398 | EXP 149 of 150         | 19.2582269 ± 0.0086044 | 0.9975 | EXP 150 of 150         | 710.324748 ± 0.038677  | 1.0000 | EXP 149 of 150         |
| 23G08930            | 4.5 %  | 1.8172325 ± 0.0019937  | 0.9854 | EXP 150 of 150         | 30.836415 ± 0.008725   | 0.9991 | EXP 150 of 150         | 0.6217325 ± 0.0057320  | 0.4986 | EXP 150 of 150         | 22.7063278 ± 0.0093613 | 0.9979 | EXP 150 of 150         | 705.027337 ± 0.039085  | 0.9999 | EXP 150 of 150         |
| 23G08932            | 4.9 %  | 1.6154456 ± 0.0018569  | 0.9840 | EXP 150 of 150         | 34.186956 ± 0.009836   | 0.9991 | EXP 150 of 150         | 0.6234410 ± 0.0067754  | 0.4108 | EXP 149 of 150         | 26.2590596 ± 0.0087534 | 0.9987 | EXP 150 of 150         | 660.793272 ± 0.036429  | 1.0000 | EXP 148 of 150         |
| 23G08933            | 5.3 %  | 1.4367480 ± 0.0017349  | 0.9825 | EXP 150 of 150         | 33.512778 ± 0.009646   | 0.9991 | EXP 148 of 150         | 0.5939796 ± 0.0064619  | 0.4163 | EXP 150 of 150         | 27.0848755 ± 0.0083919 | 0.9988 | EXP 150 of 150         | 608.170136 ± 0.041097  | 0.9999 | EXP 150 of 150         |
| 23G08935            | 5.7 %  | 1.1796611 ± 0.0015441  | 0.9784 | EXP 148 of 150         | 29.807400 ± 0.009329   | 0.9990 | EXP 146 of 150         | 0.5220544 ± 0.0061599  | 0.2892 | EXP 147 of 150         | 25.5350302 ± 0.0086386 | 0.9986 | EXP 148 of 150         | 520.262476 ± 0.033605  | 0.9999 | EXP 149 of 150         |
| 23G08936            | 6.1 %  | 0.7503584 ± 0.0011640  | 0.9671 | EXP 149 of 150         | 22.657976 ± 0.008808   | 0.9983 | EXP 149 of 150         | 0.3813142 ± 0.0065665  | 0.1633 | EXP 150 of 150         | 20.7601550 ± 0.0084800 | 0.9980 | EXP 150 of 150         | 357.579445 ± 0.034019  | 0.9998 | EXP 150 of 150         |
| 23G08938            | 6.5 %  | 0.5938912 ± 0.0009730  | 0.9610 | EXP 150 of 150         | 19.155569 ± 0.008336   | 0.9979 | EXP 150 of 150         | 0.3366609 ± 0.0058326  | 0.2503 | EXP 150 of 150         | 18.3897266 ± 0.0089701 | 0.9972 | EXP 150 of 150         | 294.417030 ± 0.026535  | 0.9998 | EXP 150 of 150         |
| 23G08939            | 6.9 %  | 0.6252048 ± 0.0011351  | 0.9544 | EXP 150 of 150         | 19.497654 ± 0.008730   | 0.9978 | EXP 150 of 150         | 0.3449543 ± 0.0063892  | 0.2204 | EXP 150 of 150         | 19.0722213 ± 0.0086557 | 0.9975 | EXP 149 of 150         | 307.194501 ± 0.026927  | 0.9999 | EXP 150 of 150         |
| 23G08941            | 7.4 %  | 0.6140228 ± 0.0011209  | 0.9530 | EXP 148 of 150         | 19.453199 ± 0.008630   | 0.9978 | EXP 150 of 150         | 0.3493581 ± 0.0069305  | 0.1024 | EXP 150 of 150         | 19.7468051 ± 0.0082656 | 0.9979 | EXP 150 of 150         | 306.906252 ± 0.027975  | 0.9998 | EXP 150 of 150         |
| 23G08942            | 8.0 %  | 0.5033242 ± 0.0010784  | 0.9307 | EXP 150 of 150         | 19.027610 ± 0.009280   | 0.9974 | EXP 150 of 150         | 0.3237589 ± 0.0064118  | 0.1186 | EXP 149 of 150         | 19.5802142 ± 0.0086914 | 0.9977 | EXP 149 of 150         | 271.225078 ± 0.025749  | 0.9998 | EXP 147 of 150         |
| 23G08944            | 8.6 %  | 0.4683586 ± 0.0010828  | 0.9231 | EXP 150 of 150         | 17.083838 ± 0.008569   | 0.9973 | EXP 150 of 150         | 0.2981951 ± 0.0055754  | 0.1795 | EXP 150 of 150         | 17.5764073 ± 0.0078223 | 0.9976 | EXP 148 of 150         | 247.936218 ± 0.025096  | 0.9998 | EXP 150 of 150         |
| 23G08945            | 9.6 %  | 0.7222455 ± 0.0012492  | 0.9600 | EXP 150 of 150         | 32.949918 ± 0.011191   | 0.9987 | EXP 150 of 150         | 0.4342493 ± 0.0060038  | 0.3093 | EXP 150 of 150         | 24.6027074 ± 0.0081431 | 0.9987 | EXP 150 of 150         | 365.926523 ± 0.029429  | 0.9999 | EXP 149 of 150         |
| 23G08947            | 10.6 % | 0.5454066 ± 0.0009832  | 0.9556 | EXP 148 of 150         | 26.687313 ± 0.009427   | 0.9986 | EXP 150 of 150         | 0.3428031 ± 0.0058975  | 0.2373 | EXP 150 of 150         | 19.9105203 ± 0.0074718 | 0.9983 | EXP 148 of 150         | 284.690961 ± 0.026395  | 0.9998 | EXP 147 of 150         |
| 23G08948            | 12.0 % | 0.4483071 ± 0.0009721  | 0.9282 | EXP 150 of 150         | 26.719005 ± 0.009338   | 0.9987 | EXP 150 of 150         | 0.2931175 ± 0.0057684  | 0.1302 | EXP 149 of 150         | 17.7426067 ± 0.0088057 | 0.9971 | EXP 150 of 150         | 241.553693 ± 0.026635  | 0.9998 | EXP 149 of 150         |
| 23G08950            | 13.5 % | 0.3124236 ± 0.0008565  | 0.8810 | EXP 150 of 150         | 26.308132 ± 0.009619   | 0.9985 | EXP 150 of 150         | 0.2260250 ± 0.0066849  | 0.0586 | EXP 150 of 150         | 14.2743522 ± 0.0080322 | 0.9962 | EXP 149 of 150         | 178.301935 ± 0.024062  | 0.9996 | EXP 150 of 150         |
| 23G08951            | 15.0 % | 0.3064093 ± 0.0007937  | 0.8873 | EXP 150 of 150         | 29.560411 ± 0.009478   | 0.9989 | EXP 150 of 150         | 0.2002976 ± 0.0062229  | 0.0511 | EXP 150 of 150         | 12.3075253 ± 0.0074999 | 0.9955 | EXP 150 of 150         | 164.139304 ± 0.022141  | 0.9996 | EXP 150 of 150         |
| 23G08953            | 16.6 % | 0.2373933 ± 0.0007315  | 0.8186 | EXP 150 of 150         | 38.442095 ± 0.009778   | 0.9993 | EXP 148 of 150         | 0.1600027 ± 0.0065166  | 0.0173 | EXP 150 of 150         | 10.2805065 ± 0.0062271 | 0.9956 | EXP 147 of 150         | 128.455981 ± 0.022051  | 0.9992 | EXP 149 of 150         |
| 23G08954            | 18.2 % | 0.1804606 ± 0.0006109  | 0.7412 | EXP 146 of 150         | 34.733959 ± 0.010908   | 0.9989 | EXP 150 of 150         | 0.1286169 ± 0.0063748  | 0.0179 | EXP 150 of 150         | 7.9683238 ± 0.0067411  | 0.9912 | EXP 150 of 150         | 97.125747 ± 0.019298   | 0.9987 | EXP 150 of 150         |
| 23G08956            | 19.6 % | 0.1420133 ± 0.0005805  | 0.5889 | EXP 149 of 150         | 25.190021 ± 0.009570   | 0.9984 | EXP 150 of 150         | 0.0954892 ± 0.0066973  | 0.0064 | EXP 150 of 150         | 6.1361632 ± 0.0070124  | 0.9833 | EXP 150 of 150         | 76.865580 ± 0.023183   | 0.9965 | EXP 150 of 150         |
| 23G08957            | 21.5 % | 0.1193792 ± 0.0005380  | 0.5185 | EXP 150 of 150         | 25.841413 ± 0.009041   | 0.9987 | EXP 150 of 150         | 0.0909530 ± 0.0062668  | 0.0300 | EXP 150 of 150         | 5.5354702 ± 0.0065322  | 0.9823 | EXP 148 of 150         | 66.118005 ± 0.019900   | 0.9956 | EXP 150 of 150         |
| 23G08959            | 22.8 % | 0.0851109 ± 0.0004751  | 0.0717 | EXP 150 of 150         | 24.961960 ± 0.008768   | 0.9987 | EXP 149 of 150         | 0.0668743 ± 0.0072493  | 0.0009 | EXP 150 of 150         | 4.5217313 ± 0.0073433  | 0.9668 | EXP 150 of 150         | 49.447858 ± 0.016995   | 0.9902 | EXP 150 of 150         |
| 23G08960            | 24.5 % | 0.0744723 ± 0.0004438  | 0.0319 | EXP 150 of 150         | 26.146386 ± 0.009273   | 0.9986 | EXP 150 of 150         | 0.0637307 ± 0.0054481  | 0.0237 | EXP 146 of 150         | 4.2582151 ± 0.0066652  | 0.9678 | EXP 150 of 150         | 43.763810 ± 0.017917   | 0.9788 | EXP 150 of 150         |
| 23G08962            | 26.0 % | 0.0629794 ± 0.0003914  | 0.0040 | EXP 150 of 150         | 26.003590 ± 0.009329   | 0.9986 | EXP 150 of 150         | 0.0524090 ± 0.0054668  | 0.0138 | EXP 150 of 150         | 3.9489668 ± 0.0067073  | 0.9631 | EXP 150 of 150         | 38.217775 ± 0.017775   | 0.9547 | EXP 150 of 150         |

| Sample Parameters |        | Sample   | Material   | Location     | Standard Name    | Standard (in Ma) | %1σ   | Standard Reference  | Standard 40Ar/39Ar | %1σ   | J          | %1σ   | Air 40Ar/36Ar | %1σ   | MDF (lin) | %1σ   | Volume Ratio | Sensitivity (mol/volt) | Day | Month | Year | Hour | Min | Resist | Analyst     | Project             | Experiment | Nmb |
|-------------------|--------|----------|------------|--------------|------------------|------------------|-------|---------------------|--------------------|-------|------------|-------|---------------|-------|-----------|-------|--------------|------------------------|-----|-------|------|------|-----|--------|-------------|---------------------|------------|-----|
| 23G08914          | 0.8 %  | LF-21-54 | GROUNDMASS | Hells Canyon | FCT-NM (1A37-23) | 28.201           | 0.082 | Kuiper et al (2008) | 9.96371            | 0.085 | 0.00155820 | 0.085 | 306.343       | 0.206 | 0.9936403 | 0.057 | 1            | 4.27E-14               | 7   | MAY   | 2023 | 22   | 53  | 1      | Dan Miggins | Oregon\Mass (22-34) | 23G08911   | 01  |
| 23G08915          | 1.0 %  | LF-21-54 | GROUNDMASS | Hells Canyon | FCT-NM (1A37-23) | 28.201           | 0.082 | Kuiper et al (2008) | 9.96371            | 0.085 | 0.00155820 | 0.085 | 306.343       | 0.206 | 0.9936403 | 0.057 | 1            | 4.27E-14               | 7   | MAY   | 2023 | 23   | 3   | 1      | Dan Miggins | Oregon\Mass (22-34) | 23G08911   | 01  |
| 23G08917          | 1.2 %  | LF-21-54 | GROUNDMASS | Hells Canyon | FCT-NM (1A37-23) | 28.201           | 0.082 | Kuiper et al (2008) | 9.96371            | 0.085 | 0.00155820 | 0.085 | 306.343       | 0.206 | 0.9936403 | 0.057 | 1            | 4.27E-14               | 7   | MAY   | 2023 | 23   | 23  | 1      | Dan Miggins | Oregon\Mass (22-34) | 23G08911   | 01  |
| 23G08918          | 1.4 %  | LF-21-54 | GROUNDMASS | Hells Canyon | FCT-NM (1A37-23) | 28.201           | 0.082 | Kuiper et al (2008) | 9.96371            | 0.085 | 0.00155820 | 0.085 | 306.343       | 0.206 | 0.9936403 | 0.057 | 1            | 4.27E-14               | 7   | MAY   | 2023 | 23   | 33  | 1      | Dan Miggins | Oregon\Mass (22-34) | 23G08911   | 01  |
| 23G08920          | 1.7 %  | LF-21-54 | GROUNDMASS | Hells Canyon | FCT-NM (1A37-23) | 28.201           | 0.082 | Kuiper et al (2008) | 9.96371            | 0.085 | 0.00155820 | 0.085 | 306.343       | 0.206 | 0.9936403 | 0.057 | 1            | 4.27E-14               | 7   | MAY   | 2023 | 23   | 54  | 1      | Dan Miggins | Oregon\Mass (22-34) | 23G08911   | 01  |
| 23G08921          | 2.0 %  | LF-21-54 | GROUNDMASS | Hells Canyon | FCT-NM (1A37-23) | 28.201           | 0.082 | Kuiper et al (2008) | 9.96371            | 0.085 | 0.00155820 | 0.085 | 306.343       | 0.206 | 0.9936403 | 0.057 | 1            | 4.27E-14               | 8   | MAY   | 2023 | 0    | 4   | 1      | Dan Miggins | Oregon\Mass (22-34) | 23G08911   | 01  |
| 23G08923          | 2.4 %  | LF-21-54 | GROUNDMASS | Hells Canyon | FCT-NM (1A37-23) | 28.201           | 0.082 | Kuiper et al (2008) | 9.96371            | 0.085 | 0.00155820 | 0.085 | 306.343       | 0.206 | 0.9936403 | 0.057 | 1            | 4.27E-14               | 8   | MAY   | 2023 | 0    | 24  | 1      | Dan Miggins | Oregon\Mass (22-34) | 23G08911   | 01  |
| 23G08924          | 2.8 %  | LF-21-54 | GROUNDMASS | Hells Canyon | FCT-NM (1A37-23) | 28.201           | 0.082 | Kuiper et al (2008) | 9.96371            | 0.085 | 0.00155820 | 0.085 | 306.343       | 0.206 | 0.9936403 | 0.057 | 1            | 4.27E-14               | 8   | MAY   | 2023 | 0    | 34  | 1      | Dan Miggins | Oregon\Mass (22-34) | 23G08911   | 01  |
| 23G08926          | 3.2 %  | LF-21-54 | GROUNDMASS | Hells Canyon | FCT-NM (1A37-23) | 28.201           | 0.082 | Kuiper et al (2008) | 9.96371            | 0.085 | 0.00155820 | 0.085 | 306.343       | 0.206 | 0.9936403 | 0.057 | 1            | 4.27E-14               | 8   | MAY   | 2023 | 0    | 54  | 1      | Dan Miggins | Oregon\Mass (22-34) | 23G08911   | 01  |
| 23G08927          | 3.6 %  | LF-21-54 | GROUNDMASS | Hells Canyon | FCT-NM (1A37-23) | 28.201           | 0.082 | Kuiper et al (2008) | 9.96371            | 0.085 | 0.00155820 | 0.085 | 306.343       | 0.206 | 0.9936403 | 0.057 | 1            | 4.27E-14               | 8   | MAY   | 2023 | 1    | 5   | 1      | Dan Miggins | Oregon\Mass (22-34) | 23G08911   | 01  |
| 23G08929          | 4.0 %  | LF-21-54 | GROUNDMASS | Hells Canyon | FCT-NM (1A37-23) | 28.201           | 0.082 | Kuiper et al (2008) | 9.96371            | 0.085 | 0.00155820 | 0.085 | 306.343       | 0.206 | 0.9936403 | 0.057 | 1            | 4.27E-14               | 8   | MAY   | 2023 | 1    | 25  | 1      | Dan Miggins | Oregon\Mass (22-34) | 23G08911   | 01  |
| 23G08930          | 4.5 %  | LF-21-54 | GROUNDMASS | Hells Canyon | FCT-NM (1A37-23) | 28.201           | 0.082 | Kuiper et al (2008) | 9.96371            | 0.085 | 0.00155820 | 0.085 | 306.343       | 0.206 | 0.9936403 | 0.057 | 1            | 4.27E-14               | 8   | MAY   | 2023 | 1    | 35  | 1      | Dan Miggins | Oregon\Mass (22-34) | 23G08911   | 01  |
| 23G08932          | 4.9 %  | LF-21-54 | GROUNDMASS | Hells Canyon | FCT-NM (1A37-23) | 28.201           | 0.082 | Kuiper et al (2008) | 9.96371            | 0.085 | 0.00155820 | 0.085 | 306.343       | 0.206 | 0.9936403 | 0.057 | 1            | 4.27E-14               | 8   | MAY   | 2023 | 1    | 55  | 1      | Dan Miggins | Oregon\Mass (22-34) | 23G08911   | 01  |
| 23G08933          | 5.3 %  | LF-21-54 | GROUNDMASS | Hells Canyon | FCT-NM (1A37-23) | 28.201           | 0.082 | Kuiper et al (2008) | 9.96371            | 0.085 | 0.00155820 | 0.085 | 306.343       | 0.206 | 0.9936403 | 0.057 | 1            | 4.27E-14               | 8   | MAY   | 2023 | 2    | 6   | 1      | Dan Miggins | Oregon\Mass (22-34) | 23G08911   | 01  |
| 23G08935          | 5.7 %  | LF-21-54 | GROUNDMASS | Hells Canyon | FCT-NM (1A37-23) | 28.201           | 0.082 | Kuiper et al (2008) | 9.96371            | 0.085 | 0.00155820 | 0.085 | 306.343       | 0.206 | 0.9936403 | 0.057 | 1            | 4.27E-14               | 8   | MAY   | 2023 | 2    | 26  | 1      | Dan Miggins | Oregon\Mass (22-34) | 23G08911   | 01  |
| 23G08936          | 6.1 %  | LF-21-54 | GROUNDMASS | Hells Canyon | FCT-NM (1A37-23) | 28.201           | 0.082 | Kuiper et al (2008) | 9.96371            | 0.085 | 0.00155820 | 0.085 | 306.343       | 0.206 | 0.9936403 | 0.057 | 1            | 4.27E-14               | 8   | MAY   | 2023 | 2    | 36  | 1      | Dan Miggins | Oregon\Mass (22-34) | 23G08911   | 01  |
| 23G08938          | 6.5 %  | LF-21-54 | GROUNDMASS | Hells Canyon | FCT-NM (1A37-23) | 28.201           | 0.082 | Kuiper et al (2008) | 9.96371            | 0.085 | 0.00155820 | 0.085 | 306.343       | 0.206 | 0.9936403 | 0.057 | 1            | 4.27E-14               | 8   | MAY   | 2023 | 2    | 56  | 1      | Dan Miggins | Oregon\Mass (22-34) | 23G08911   | 01  |
| 23G08939          | 6.9 %  | LF-21-54 | GROUNDMASS | Hells Canyon | FCT-NM (1A37-23) | 28.201           | 0.082 | Kuiper et al (2008) | 9.96371            | 0.085 | 0.00155820 | 0.085 | 306.343       | 0.206 | 0.9936403 | 0.057 | 1            | 4.27E-14               | 8   | MAY   | 2023 | 3    | 6   | 1      | Dan Miggins | Oregon\Mass (22-34) | 23G08911   | 01  |
| 23G08941          | 7.4 %  | LF-21-54 | GROUNDMASS | Hells Canyon | FCT-NM (1A37-23) | 28.201           | 0.082 | Kuiper et al (2008) | 9.96371            | 0.085 | 0.00155820 | 0.085 | 306.343       | 0.206 | 0.9936403 | 0.057 | 1            | 4.27E-14               | 8   | MAY   | 2023 | 3    | 27  | 1      | Dan Miggins | Oregon\Mass (22-34) | 23G08911   | 01  |
| 23G08942          | 8.0 %  | LF-21-54 | GROUNDMASS | Hells Canyon | FCT-NM (1A37-23) | 28.201           | 0.082 | Kuiper et al (2008) | 9.96371            | 0.085 | 0.00155820 | 0.085 | 306.343       | 0.206 | 0.9936403 | 0.057 | 1            | 4.27E-14               | 8   | MAY   | 2023 | 3    | 37  | 1      | Dan Miggins | Oregon\Mass (22-34) | 23G08911   | 01  |
| 23G08944          | 8.6 %  | LF-21-54 | GROUNDMASS | Hells Canyon | FCT-NM (1A37-23) | 28.201           | 0.082 | Kuiper et al (2008) | 9.96371            | 0.085 | 0.00155820 | 0.085 | 306.343       | 0.206 | 0.9936403 | 0.057 | 1            | 4.27E-14               | 8   | MAY   | 2023 | 3    | 57  | 1      | Dan Miggins | Oregon\Mass (22-34) | 23G08911   | 01  |
| 23G08945          | 9.6 %  | LF-21-54 | GROUNDMASS | Hells Canyon | FCT-NM (1A37-23) | 28.201           | 0.082 | Kuiper et al (2008) | 9.96371            | 0.085 | 0.00155820 | 0.085 | 306.343       | 0.206 | 0.9936403 | 0.057 | 1            | 4.27E-14               | 8   | MAY   | 2023 | 4    | 7   | 1      | Dan Miggins | Oregon\Mass (22-34) | 23G08911   | 01  |
| 23G08947          | 10.6 % | LF-21-54 | GROUNDMASS | Hells Canyon | FCT-NM (1A37-23) | 28.201           | 0.082 | Kuiper et al (2008) | 9.96371            | 0.085 | 0.00155820 | 0.085 | 306.343       | 0.206 | 0.9936403 | 0.057 | 1            | 4.27E-14               | 8   | MAY   | 2023 | 4    | 28  | 1      | Dan Miggins | Oregon\Mass (22-34) | 23G08911   | 01  |
| 23G08948          | 12.0 % | LF-21-54 | GROUNDMASS | Hells Canyon | FCT-NM (1A37-23) | 28.201           | 0.082 | Kuiper et al (2008) | 9.96371            | 0.085 | 0.00155820 | 0.085 | 306.343       | 0.206 | 0.9936403 | 0.057 | 1            | 4.27E-14               | 8   | MAY   | 2023 | 4    | 38  | 1      | Dan Miggins | Oregon\Mass (22-34) | 23G08911   | 01  |
| 23G08950          | 13.5 % | LF-21-54 | GROUNDMASS | Hells Canyon | FCT-NM (1A37-23) | 28.201           | 0.082 | Kuiper et al (2008) | 9.96371            | 0.085 | 0.00155820 | 0.085 | 306.343       | 0.206 | 0.9936403 | 0.057 | 1            | 4.27E-14               | 8   | MAY   | 2023 | 4    | 58  | 1      | Dan Miggins | Oregon\Mass (22-34) | 23G08911   | 01  |
| 23G08951          | 15.0 % | LF-21-54 | GROUNDMASS | Hells Canyon | FCT-NM (1A37-23) | 28.201           | 0.082 | Kuiper et al (2008) | 9.96371            | 0.085 | 0.00155820 | 0.085 | 306.343       | 0.206 | 0.9936403 | 0.057 | 1            | 4.27E-14               | 8   | MAY   | 2023 | 5    | 8   | 1      | Dan Miggins | Oregon\Mass (22-34) | 23G08911   | 01  |
| 23G08953          | 16.6 % | LF-21-54 | GROUNDMASS | Hells Canyon | FCT-NM (1A37-23) | 28.201           | 0.082 | Kuiper et al (2008) | 9.96371            | 0.085 | 0.00155820 | 0.085 | 306.343       | 0.206 | 0.9936403 | 0.057 | 1            | 4.27E-14               | 8   | MAY   | 2023 | 5    | 29  | 1      | Dan Miggins | Oregon\Mass (22-34) | 23G08911   | 01  |
| 23G08954          | 18.2 % | LF-21-54 | GROUNDMASS | Hells Canyon | FCT-NM (1A37-23) | 28.201           | 0.082 | Kuiper et al (2008) | 9.96371            | 0.085 | 0.00155820 | 0.085 | 306.343       | 0.206 | 0.9936403 | 0.057 | 1            | 4.27E-14               | 8   | MAY   | 2023 | 5    | 39  | 1      | Dan Miggins | Oregon\Mass (22-34) | 23G08911   | 01  |
| 23G08956          | 19.6 % | LF-21-54 | GROUNDMASS | Hells Canyon | FCT-NM (1A37-23) | 28.201           | 0.082 | Kuiper et al (2008) | 9.96371            | 0.085 | 0.00155820 | 0.085 | 306.343       | 0.206 | 0.9936403 | 0.057 | 1            | 4.27E-14               | 8   | MAY   | 2023 | 5    | 59  | 1      | Dan Miggins | Oregon\Mass (22-34) | 23G08911   | 01  |
| 23G08957          | 21.5 % | LF-21-54 | GROUNDMASS | Hells Canyon | FCT-NM (1A37-23) | 28.201           | 0.082 | Kuiper et al (2008) | 9.96371            | 0.085 | 0.00155820 | 0.085 | 306.343       | 0.206 | 0.9936403 | 0.057 | 1            | 4.27E-14               | 8   | MAY   | 2023 | 6    | 9   | 1      | Dan Miggins | Oregon\Mass (22-34) | 23G08911   | 01  |
| 23G08959          | 22.8 % | LF-21-54 | GROUNDMASS | Hells Canyon | FCT-NM (1A37-23) | 28.201           | 0.082 | Kuiper et al (2008) | 9.96371            | 0.085 | 0.00155820 | 0.085 | 306.343       | 0.206 | 0.9936403 | 0.057 | 1            | 4.27E-14               | 8   | MAY   | 2023 | 6    | 29  | 1      | Dan Miggins | Oregon\Mass (22-34) | 23G08911   | 01  |
| 23G08960          | 24.5 % | LF-21-54 | GROUNDMASS | Hells Canyon | FCT-NM (1A37-23) | 28.201           | 0.082 | Kuiper et al (2008) | 9.96371            | 0.085 | 0.00155820 | 0.085 | 306.343       | 0.206 | 0.9936403 | 0.057 | 1            | 4.27E-14               | 8   | MAY   | 2023 | 6    | 40  | 1      | Dan Miggins | Oregon\Mass (22-34) | 23G08911   | 01  |
| 23G08962          | 26.0 % | LF-21-54 | GROUNDMASS | Hells Canyon | FCT-NM (1A37-23) | 28.201           | 0.082 | Kuiper et al (2008) | 9.96371            | 0.085 | 0.00155820 | 0.085 | 306.343       | 0.206 | 0.9936403 | 0.057 | 1            | 4.27E-14               | 8   | MAY   | 2023 | 7    | 0   | 1      | Dan Miggins | Oregon\Mass (22-34) | 23G08911   | 01  |



| Irradiation Constants |        | 40/36(a) |       | %1σ   | 40/36(c) |        | %1σ   | 38/36(a) |   | %1σ      | 38/36(c) |         | %1σ  | 39/37(ca) |      | %1σ      | 38/37(ca) |          | %1σ  | 36/37(ca) |   | %1σ  | 40/39(k) |   | %1σ | 38/39(k) |   | %1σ | 36/38(cl) |   | %1σ  | K/Ca | %1σ | K/Cl | %1σ | Ca/Cl | %1σ | Irradiation | X-pos | Y-pos | Z/H-pos   |           |        |        |       |
|-----------------------|--------|----------|-------|-------|----------|--------|-------|----------|---|----------|----------|---------|------|-----------|------|----------|-----------|----------|------|-----------|---|------|----------|---|-----|----------|---|-----|-----------|---|------|------|-----|------|-----|-------|-----|-------------|-------|-------|-----------|-----------|--------|--------|-------|
|                       |        |          |       |       |          |        |       |          |   |          |          |         |      |           |      |          |           |          |      |           |   |      |          |   |     |          |   |     |           |   |      |      |     |      |     |       |     |             |       |       |           |           |        |        |       |
| 23G08914              | 0.8 %  | 298.56   | 0.104 | 0.018 | 35       | 0.1885 | 0.159 | 1.493    | 3 | 0.000643 | 0.92     | 0.00018 | 9.63 | 0.00027   | 0.17 | 0.000607 | 9.65      | 0.012077 | 0.09 | 0         | 0 | 0.43 | 0        | 0 | 0   | 0        | 0 | 0   | 0         | 0 | 0.43 | 0    | 0   | 0    | 0   | 0     | 0   | 0           | 0     | 0     | 23-OSU-01 | 999.00    | 999.00 | 58.17  |       |
| 23G08915              | 1.0 %  | 298.56   | 0.104 | 0.018 | 35       | 0.1885 | 0.159 | 1.493    | 3 | 0.000643 | 0.92     | 0.00018 | 9.63 | 0.00027   | 0.17 | 0.000607 | 9.65      | 0.012077 | 0.09 | 0         | 0 | 0.43 | 0        | 0 | 0   | 0        | 0 | 0   | 0         | 0 | 0    | 0.43 | 0   | 0    | 0   | 0     | 0   | 0           | 0     | 0     | 0         | 23-OSU-01 | 999.00 | 999.00 | 58.17 |
| 23G08917              | 1.2 %  | 298.56   | 0.104 | 0.018 | 35       | 0.1885 | 0.159 | 1.493    | 3 | 0.000643 | 0.92     | 0.00018 | 9.63 | 0.00027   | 0.17 | 0.000607 | 9.65      | 0.012077 | 0.09 | 0         | 0 | 0.43 | 0        | 0 | 0   | 0        | 0 | 0   | 0         | 0 | 0    | 0.43 | 0   | 0    | 0   | 0     | 0   | 0           | 0     | 0     | 0         | 23-OSU-01 | 999.00 | 999.00 | 58.17 |
| 23G08918              | 1.4 %  | 298.56   | 0.104 | 0.018 | 35       | 0.1885 | 0.159 | 1.493    | 3 | 0.000643 | 0.92     | 0.00018 | 9.63 | 0.00027   | 0.17 | 0.000607 | 9.65      | 0.012077 | 0.09 | 0         | 0 | 0.43 | 0        | 0 | 0   | 0        | 0 | 0   | 0         | 0 | 0    | 0.43 | 0   | 0    | 0   | 0     | 0   | 0           | 0     | 0     | 0         | 23-OSU-01 | 999.00 | 999.00 | 58.17 |
| 23G08920              | 1.7 %  | 298.56   | 0.104 | 0.018 | 35       | 0.1885 | 0.159 | 1.493    | 3 | 0.000643 | 0.92     | 0.00018 | 9.63 | 0.00027   | 0.17 | 0.000607 | 9.65      | 0.012077 | 0.09 | 0         | 0 | 0.43 | 0        | 0 | 0   | 0        | 0 | 0   | 0         | 0 | 0    | 0.43 | 0   | 0    | 0   | 0     | 0   | 0           | 0     | 0     | 0         | 23-OSU-01 | 999.00 | 999.00 | 58.17 |
| 23G08921              | 2.0 %  | 298.56   | 0.104 | 0.018 | 35       | 0.1885 | 0.159 | 1.493    | 3 | 0.000643 | 0.92     | 0.00018 | 9.63 | 0.00027   | 0.17 | 0.000607 | 9.65      | 0.012077 | 0.09 | 0         | 0 | 0.43 | 0        | 0 | 0   | 0        | 0 | 0   | 0         | 0 | 0    | 0.43 | 0   | 0    | 0   | 0     | 0   | 0           | 0     | 0     | 0         | 23-OSU-01 | 999.00 | 999.00 | 58.17 |
| 23G08923              | 2.4 %  | 298.56   | 0.104 | 0.018 | 35       | 0.1885 | 0.159 | 1.493    | 3 | 0.000643 | 0.92     | 0.00018 | 9.63 | 0.00027   | 0.17 | 0.000607 | 9.65      | 0.012077 | 0.09 | 0         | 0 | 0.43 | 0        | 0 | 0   | 0        | 0 | 0   | 0         | 0 | 0    | 0.43 | 0   | 0    | 0   | 0     | 0   | 0           | 0     | 0     | 0         | 23-OSU-01 | 999.00 | 999.00 | 58.17 |
| 23G08924              | 2.8 %  | 298.56   | 0.104 | 0.018 | 35       | 0.1885 | 0.159 | 1.493    | 3 | 0.000643 | 0.92     | 0.00018 | 9.63 | 0.00027   | 0.17 | 0.000607 | 9.65      | 0.012077 | 0.09 | 0         | 0 | 0.43 | 0        | 0 | 0   | 0        | 0 | 0   | 0         | 0 | 0    | 0.43 | 0   | 0    | 0   | 0     | 0   | 0           | 0     | 0     | 0         | 23-OSU-01 | 999.00 | 999.00 | 58.17 |
| 23G08926              | 3.2 %  | 298.56   | 0.104 | 0.018 | 35       | 0.1885 | 0.159 | 1.493    | 3 | 0.000643 | 0.92     | 0.00018 | 9.63 | 0.00027   | 0.17 | 0.000607 | 9.65      | 0.012077 | 0.09 | 0         | 0 | 0.43 | 0        | 0 | 0   | 0        | 0 | 0   | 0         | 0 | 0    | 0.43 | 0   | 0    | 0   | 0     | 0   | 0           | 0     | 0     | 0         | 23-OSU-01 | 999.00 | 999.00 | 58.17 |
| 23G08927              | 3.6 %  | 298.56   | 0.104 | 0.018 | 35       | 0.1885 | 0.159 | 1.493    | 3 | 0.000643 | 0.92     | 0.00018 | 9.63 | 0.00027   | 0.17 | 0.000607 | 9.65      | 0.012077 | 0.09 | 0         | 0 | 0.43 | 0        | 0 | 0   | 0        | 0 | 0   | 0         | 0 | 0    | 0.43 | 0   | 0    | 0   | 0     | 0   | 0           | 0     | 0     | 0         | 23-OSU-01 | 999.00 | 999.00 | 58.17 |
| 23G08929              | 4.0 %  | 298.56   | 0.104 | 0.018 | 35       | 0.1885 | 0.159 | 1.493    | 3 | 0.000643 | 0.92     | 0.00018 | 9.63 | 0.00027   | 0.17 | 0.000607 | 9.65      | 0.012077 | 0.09 | 0         | 0 | 0.43 | 0        | 0 | 0   | 0        | 0 | 0   | 0         | 0 | 0    | 0.43 | 0   | 0    | 0   | 0     | 0   | 0           | 0     | 0     | 0         | 23-OSU-01 | 999.00 | 999.00 | 58.17 |
| 23G08930              | 4.5 %  | 298.56   | 0.104 | 0.018 | 35       | 0.1885 | 0.159 | 1.493    | 3 | 0.000643 | 0.92     | 0.00018 | 9.63 | 0.00027   | 0.17 | 0.000607 | 9.65      | 0.012077 | 0.09 | 0         | 0 | 0.43 | 0        | 0 | 0   | 0        | 0 | 0   | 0         | 0 | 0    | 0.43 | 0   | 0    | 0   | 0     | 0   | 0           | 0     | 0     | 0         | 23-OSU-01 | 999.00 | 999.00 | 58.17 |
| 23G08932              | 4.9 %  | 298.56   | 0.104 | 0.018 | 35       | 0.1885 | 0.159 | 1.493    | 3 | 0.000643 | 0.92     | 0.00018 | 9.63 | 0.00027   | 0.17 | 0.000607 | 9.65      | 0.012077 | 0.09 | 0         | 0 | 0.43 | 0        | 0 | 0   | 0        | 0 | 0   | 0         | 0 | 0    | 0.43 | 0   | 0    | 0   | 0     | 0   | 0           | 0     | 0     | 0         | 23-OSU-01 | 999.00 | 999.00 | 58.17 |
| 23G08933              | 5.3 %  | 298.56   | 0.104 | 0.018 | 35       | 0.1885 | 0.159 | 1.493    | 3 | 0.000643 | 0.92     | 0.00018 | 9.63 | 0.00027   | 0.17 | 0.000607 | 9.65      | 0.012077 | 0.09 | 0         | 0 | 0.43 | 0        | 0 | 0   | 0        | 0 | 0   | 0         | 0 | 0    | 0.43 | 0   | 0    | 0   | 0     | 0   | 0           | 0     | 0     | 0         | 23-OSU-01 | 999.00 | 999.00 | 58.17 |
| 23G08935              | 5.7 %  | 298.56   | 0.104 | 0.018 | 35       | 0.1885 | 0.159 | 1.493    | 3 | 0.000643 | 0.92     | 0.00018 | 9.63 | 0.00027   | 0.17 | 0.000607 | 9.65      | 0.012077 | 0.09 | 0         | 0 | 0.43 | 0        | 0 | 0   | 0        | 0 | 0   | 0         | 0 | 0    | 0.43 | 0   | 0    | 0   | 0     | 0   | 0           | 0     | 0     | 0         | 23-OSU-01 | 999.00 | 999.00 | 58.17 |
| 23G08936              | 6.1 %  | 298.56   | 0.104 | 0.018 | 35       | 0.1885 | 0.159 | 1.493    | 3 | 0.000643 | 0.92     | 0.00018 | 9.63 | 0.00027   | 0.17 | 0.000607 | 9.65      | 0.012077 | 0.09 | 0         | 0 | 0.43 | 0        | 0 | 0   | 0        | 0 | 0   | 0         | 0 | 0    | 0.43 | 0   | 0    | 0   | 0     | 0   | 0           | 0     | 0     | 0         | 23-OSU-01 | 999.00 | 999.00 | 58.17 |
| 23G08938              | 6.5 %  | 298.56   | 0.104 | 0.018 | 35       | 0.1885 | 0.159 | 1.493    | 3 | 0.000643 | 0.92     | 0.00018 | 9.63 | 0.00027   | 0.17 | 0.000607 | 9.65      | 0.012077 | 0.09 | 0         | 0 | 0.43 | 0        | 0 | 0   | 0        | 0 | 0   | 0         | 0 | 0    | 0.43 | 0   | 0    | 0   | 0     | 0   | 0           | 0     | 0     | 0         | 23-OSU-01 | 999.00 | 999.00 | 58.17 |
| 23G08939              | 6.9 %  | 298.56   | 0.104 | 0.018 | 35       | 0.1885 | 0.159 | 1.493    | 3 | 0.000643 | 0.92     | 0.00018 | 9.63 | 0.00027   | 0.17 | 0.000607 | 9.65      | 0.012077 | 0.09 | 0         | 0 | 0.43 | 0        | 0 | 0   | 0        | 0 | 0   | 0         | 0 | 0    | 0.43 | 0   | 0    | 0   | 0     | 0   | 0           | 0     | 0     | 0         | 23-OSU-01 | 999.00 | 999.00 | 58.17 |
| 23G08941              | 7.4 %  | 298.56   | 0.104 | 0.018 | 35       | 0.1885 | 0.159 | 1.493    | 3 | 0.000643 | 0.92     | 0.00018 | 9.63 | 0.00027   | 0.17 | 0.000607 | 9.65      | 0.012077 | 0.09 | 0         | 0 | 0.43 | 0        | 0 | 0   | 0        | 0 | 0   | 0         | 0 | 0    | 0.43 | 0   | 0    | 0   | 0     | 0   | 0           | 0     | 0     | 0         | 23-OSU-01 | 999.00 | 999.00 | 58.17 |
| 23G08942              | 8.0 %  | 298.56   | 0.104 | 0.018 | 35       | 0.1885 | 0.159 | 1.493    | 3 | 0.000643 | 0.92     | 0.00018 | 9.63 | 0.00027   | 0.17 | 0.000607 | 9.65      | 0.012077 | 0.09 | 0         | 0 | 0.43 | 0        | 0 | 0   | 0        | 0 | 0   | 0         | 0 | 0    | 0.43 | 0   | 0    | 0   | 0     | 0   | 0           | 0     | 0     | 0         | 23-OSU-01 | 999.00 | 999.00 | 58.17 |
| 23G08944              | 8.6 %  | 298.56   | 0.104 | 0.018 | 35       | 0.1885 | 0.159 | 1.493    | 3 | 0.000643 | 0.92     | 0.00018 | 9.63 | 0.00027   | 0.17 | 0.000607 | 9.65      | 0.012077 | 0.09 | 0         | 0 | 0.43 | 0        | 0 | 0   | 0        | 0 | 0   | 0         | 0 | 0    | 0.43 | 0   | 0    | 0   | 0     | 0   | 0           | 0     | 0     | 0         | 23-OSU-01 | 999.00 | 999.00 | 58.17 |
| 23G08945              | 9.6 %  | 298.56   | 0.104 | 0.018 | 35       | 0.1885 | 0.159 | 1.493    | 3 | 0.000643 | 0.92     | 0.00018 | 9.63 | 0.00027   | 0.17 | 0.000607 | 9.65      | 0.012077 | 0.09 | 0         | 0 | 0.43 | 0        | 0 | 0   | 0        | 0 | 0   | 0         | 0 | 0    | 0.43 | 0   | 0    | 0   | 0     | 0   | 0           | 0     | 0     | 0         | 23-OSU-01 | 999.00 | 999.00 | 58.17 |
| 23G08947              | 10.6 % | 298.56   | 0.104 | 0.018 | 35       | 0.1885 | 0.159 | 1.493    | 3 | 0.000643 | 0.92     | 0.00018 | 9.63 | 0.00027   | 0.17 | 0.000607 | 9.65      | 0.012077 | 0.09 | 0         | 0 | 0.43 | 0        | 0 | 0   | 0        | 0 | 0   | 0         | 0 | 0    | 0.43 | 0   | 0    | 0   | 0     | 0   | 0           | 0     | 0     | 0         | 23-OSU-01 | 999.00 | 999.00 | 58.17 |
| 23G08948              | 12.0 % | 298.56   | 0.104 | 0.018 | 35       | 0.1885 | 0.159 | 1.493    | 3 | 0.000643 | 0.92     | 0.00018 | 9.63 | 0.00027   | 0.17 | 0.000607 | 9.65      | 0.012077 | 0.09 | 0         | 0 | 0.43 | 0        | 0 | 0   | 0        | 0 | 0   | 0         | 0 | 0    | 0.43 | 0   | 0    | 0   | 0     | 0   | 0           | 0     | 0     | 0         | 23-OSU-01 | 999.00 | 999.00 | 58.17 |
| 23G08950              | 13.5 % | 298.56   | 0.104 | 0.018 | 35       | 0.1885 | 0.159 | 1.493    | 3 | 0.000643 | 0.92     | 0.00018 | 9.63 | 0.00027   | 0.17 | 0.000607 | 9.65      | 0.012077 | 0.09 | 0         | 0 | 0.43 | 0        | 0 | 0   | 0        | 0 | 0   | 0         | 0 | 0    | 0.43 | 0   | 0    | 0   | 0     | 0   | 0           | 0     | 0     | 0         | 23-OSU-01 | 999.00 | 999.00 | 58.17 |
| 23G08951              | 15.0 % | 298.56   | 0.104 | 0.018 | 35       | 0.1885 | 0.159 | 1.493    | 3 | 0.000643 | 0.92     | 0.00018 | 9.63 | 0.00027   | 0.17 | 0.000607 | 9.65      | 0.012077 | 0.09 | 0         | 0 | 0.43 | 0        | 0 | 0   | 0        | 0 | 0   | 0         | 0 | 0    | 0.43 | 0   | 0    | 0   | 0     | 0   | 0           | 0     | 0     | 0         | 23-OSU-01 | 999.00 | 999.00 | 58.17 |
| 23G08953              | 16.6 % | 298.56   | 0.104 | 0.018 | 35       | 0.1885 | 0.159 | 1.493    | 3 | 0.000643 | 0.92     | 0.00018 | 9.63 | 0.00027   | 0.17 | 0.000607 | 9.65      | 0.012077 | 0.09 | 0         | 0 | 0.43 | 0        | 0 | 0   | 0        | 0 | 0   | 0         | 0 | 0    | 0.43 | 0   | 0    | 0   | 0     | 0   | 0           | 0     | 0     | 0         | 23-OSU-01 | 999.00 | 999.00 | 58.17 |
| 23G08954              | 18.2 % | 298.56   | 0.104 | 0.018 | 35       | 0.1885 | 0.159 | 1.493    | 3 | 0.000643 | 0.92     | 0.00018 | 9.63 | 0.00027   | 0.17 | 0.000607 | 9.65      | 0.012077 | 0.09 | 0         | 0 | 0.43 | 0        | 0 | 0   | 0        | 0 | 0   | 0         | 0 | 0    | 0.43 | 0   | 0    | 0   | 0     | 0   | 0           | 0     | 0     | 0         | 23-OSU-01 | 999.00 | 999.00 | 58.17 |
| 23G08956              | 19.6 % | 298.56   | 0.104 | 0.018 | 35       | 0.1885 | 0.159 | 1.493    | 3 | 0.000643 | 0.92     | 0.00018 | 9.63 | 0.00027   | 0.17 | 0.000607 | 9.65      | 0.012077 | 0.09 | 0         | 0 | 0.43 | 0        | 0 | 0   | 0        | 0 | 0   | 0         | 0 | 0    | 0.43 | 0   | 0    | 0   | 0     | 0   | 0           | 0     | 0     | 0         | 23-OSU-01 | 999.00 | 999.00 | 58.17 |
| 23G08957              | 21.5 % | 298.56   | 0.104 | 0.018 | 35       | 0.1885 | 0.159 | 1.493    | 3 | 0.000643 | 0.92     | 0.00018 | 9.63 | 0.00027   | 0.17 | 0.000607 | 9.65      | 0.012077 | 0.09 | 0         | 0 | 0.43 | 0        | 0 | 0   | 0        | 0 | 0   | 0         | 0 | 0    | 0.43 | 0   | 0    | 0   | 0     | 0   | 0           | 0     | 0     | 0         | 23-OSU-01 | 999.00 | 999.00 | 58.17 |
| 23G08959              | 22.8 % | 298.56   | 0.104 | 0.018 | 35       | 0.1885 | 0.159 | 1.493    | 3 | 0.000643 | 0.92     | 0.00018 | 9.6  |           |      |          |           |          |      |           |   |      |          |   |     |          |   |     |           |   |      |      |     |      |     |       |     |             |       |       |           |           |        |        |       |



23G08911.AGE >>> LF-21-54 >>> OREGON | MASS (22-34) PROJECT

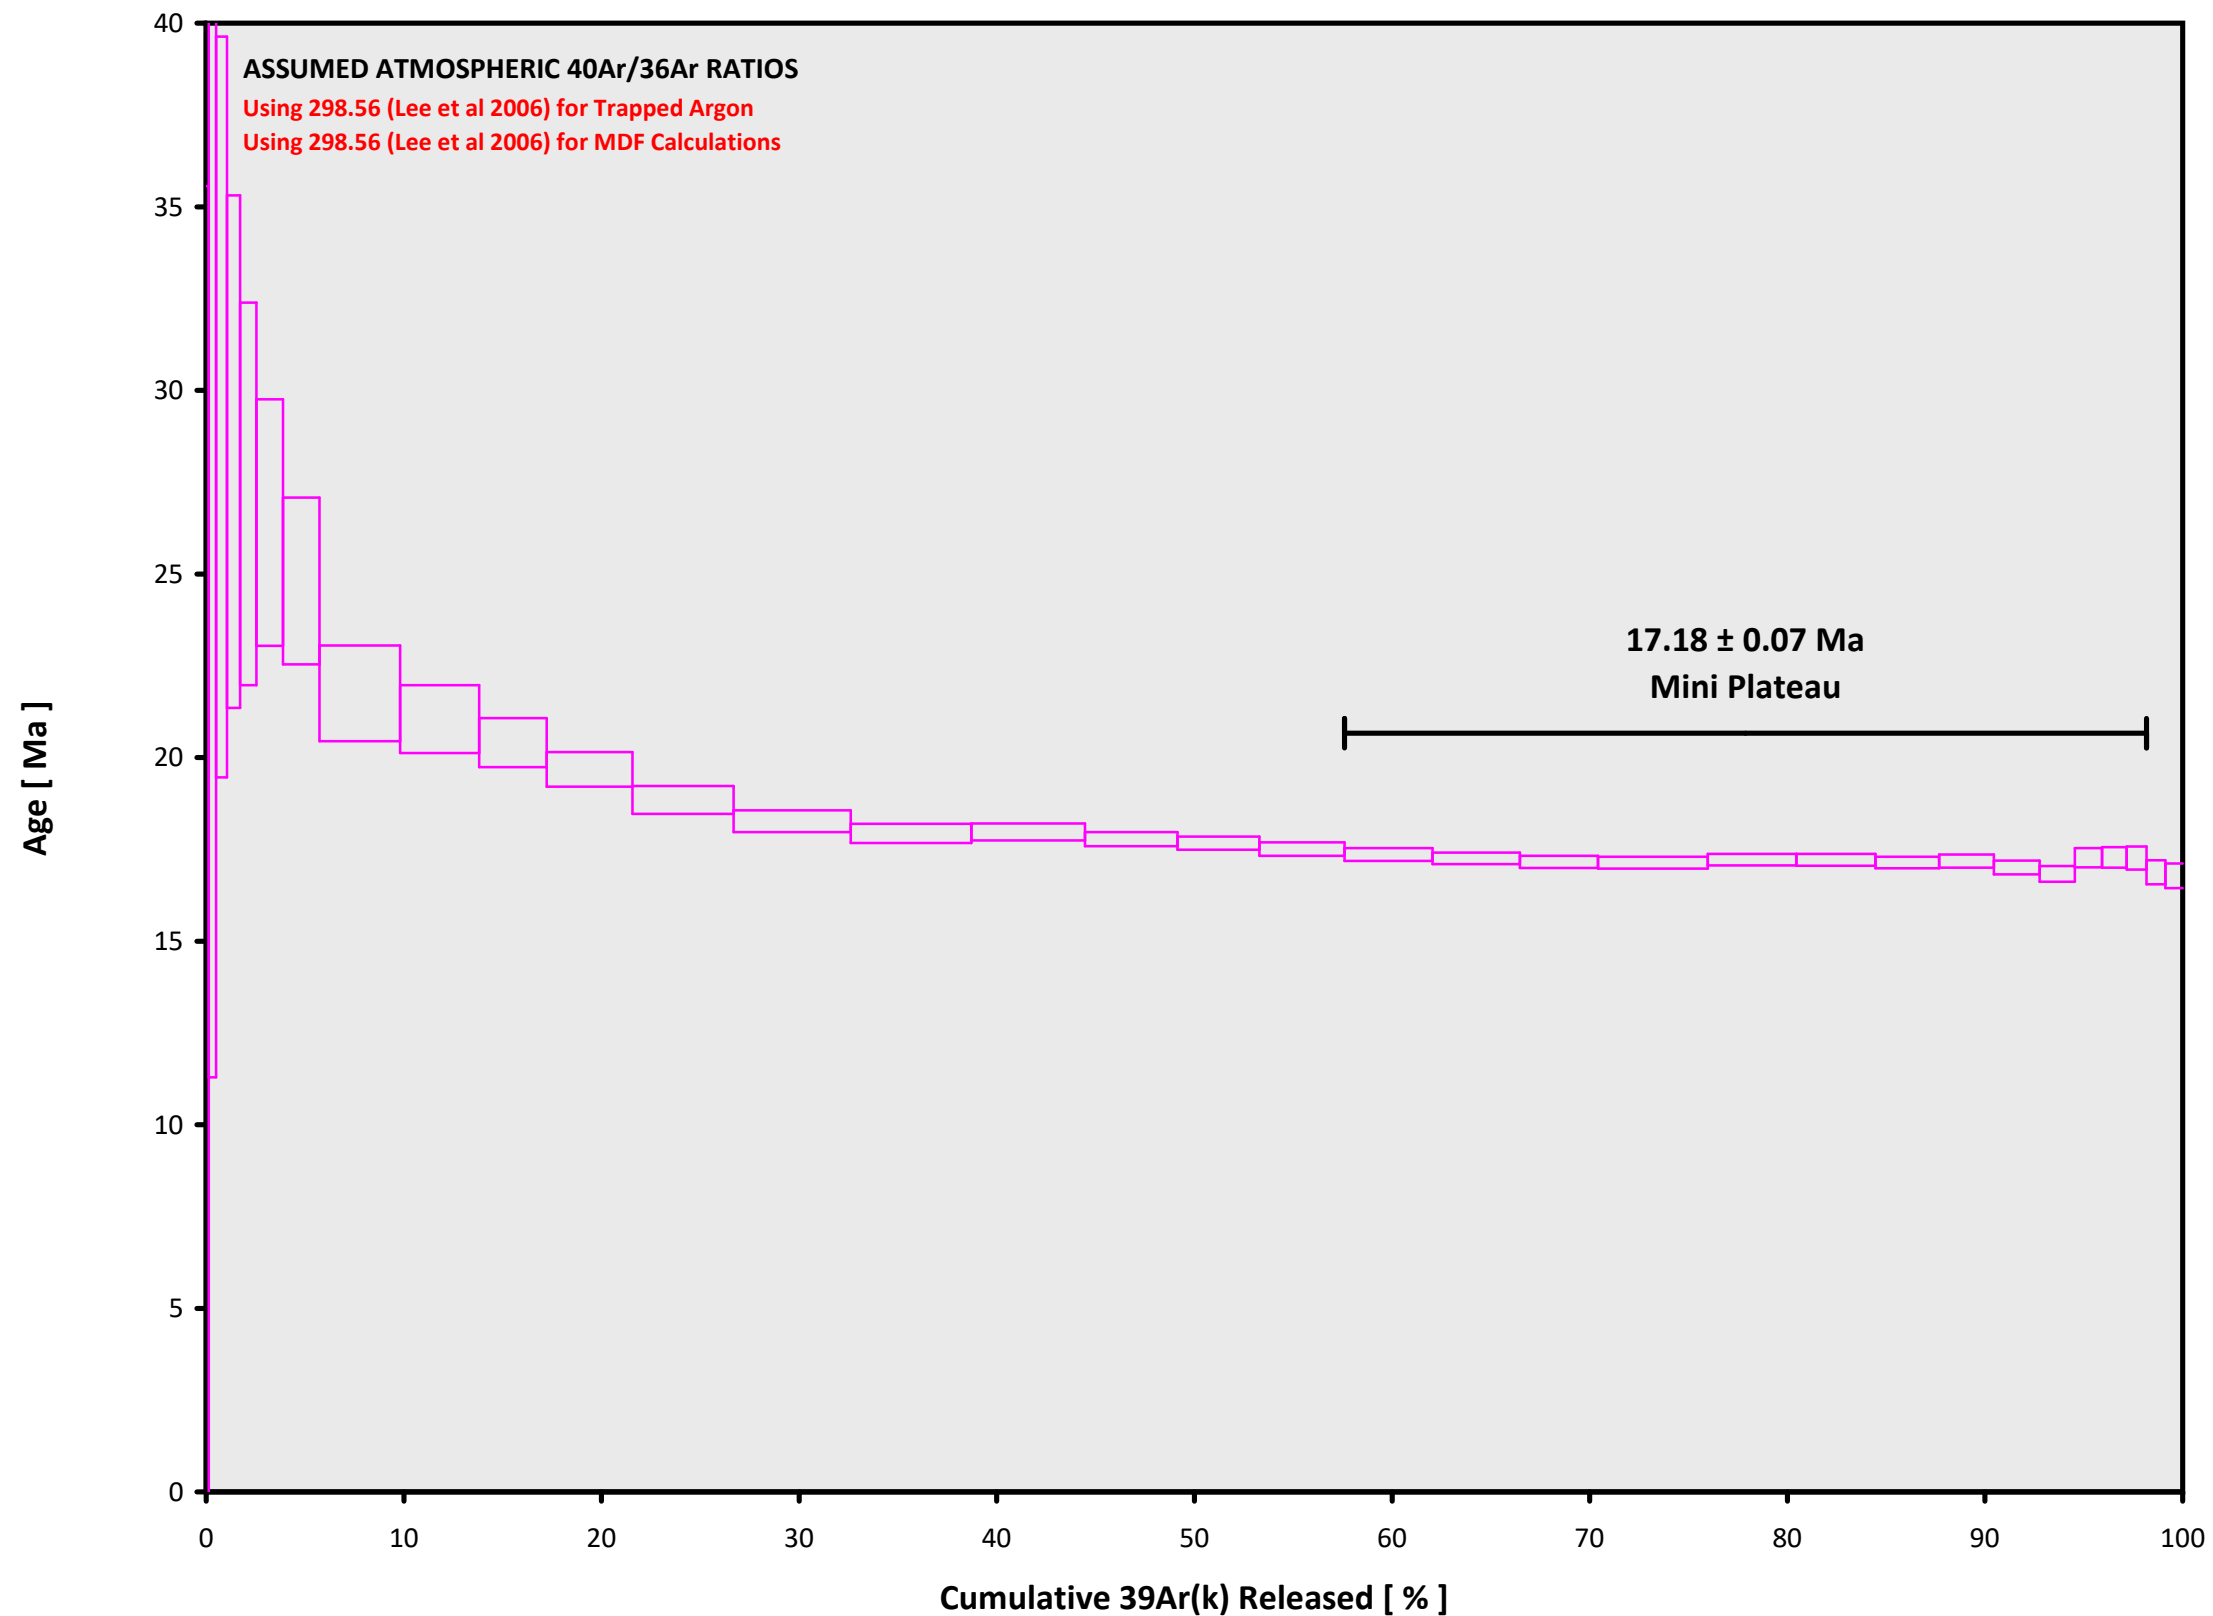

Ar-Ages in Ma

WEIGHTED PLATEAU

$17.18 \pm 0.07$

TOTAL FUSION

$18.55 \pm 0.15$

NORMAL ISOCHRON

$16.85 \pm 0.41$

INVERSE ISOCHRON

$16.87 \pm 0.41$

MSWD (PROBABILITY)

1.76 (5%)

TRAPPED  $^{40}\text{Ar}/^{36}\text{Ar}$  RATIO

Standard  $^{40}/^{36} = 298.56 \pm 0.104$  %SD

Sample Info

GROUNDMASS

Hells Canyon

Dan Miggins

IRR = 23-OSU-01 (1A37-23)

$J = 0.00155820 \pm 0.00000132$

23G08911.AGE >>> LF-21-54 >>> OREGON | MASS (22-34) PROJECT

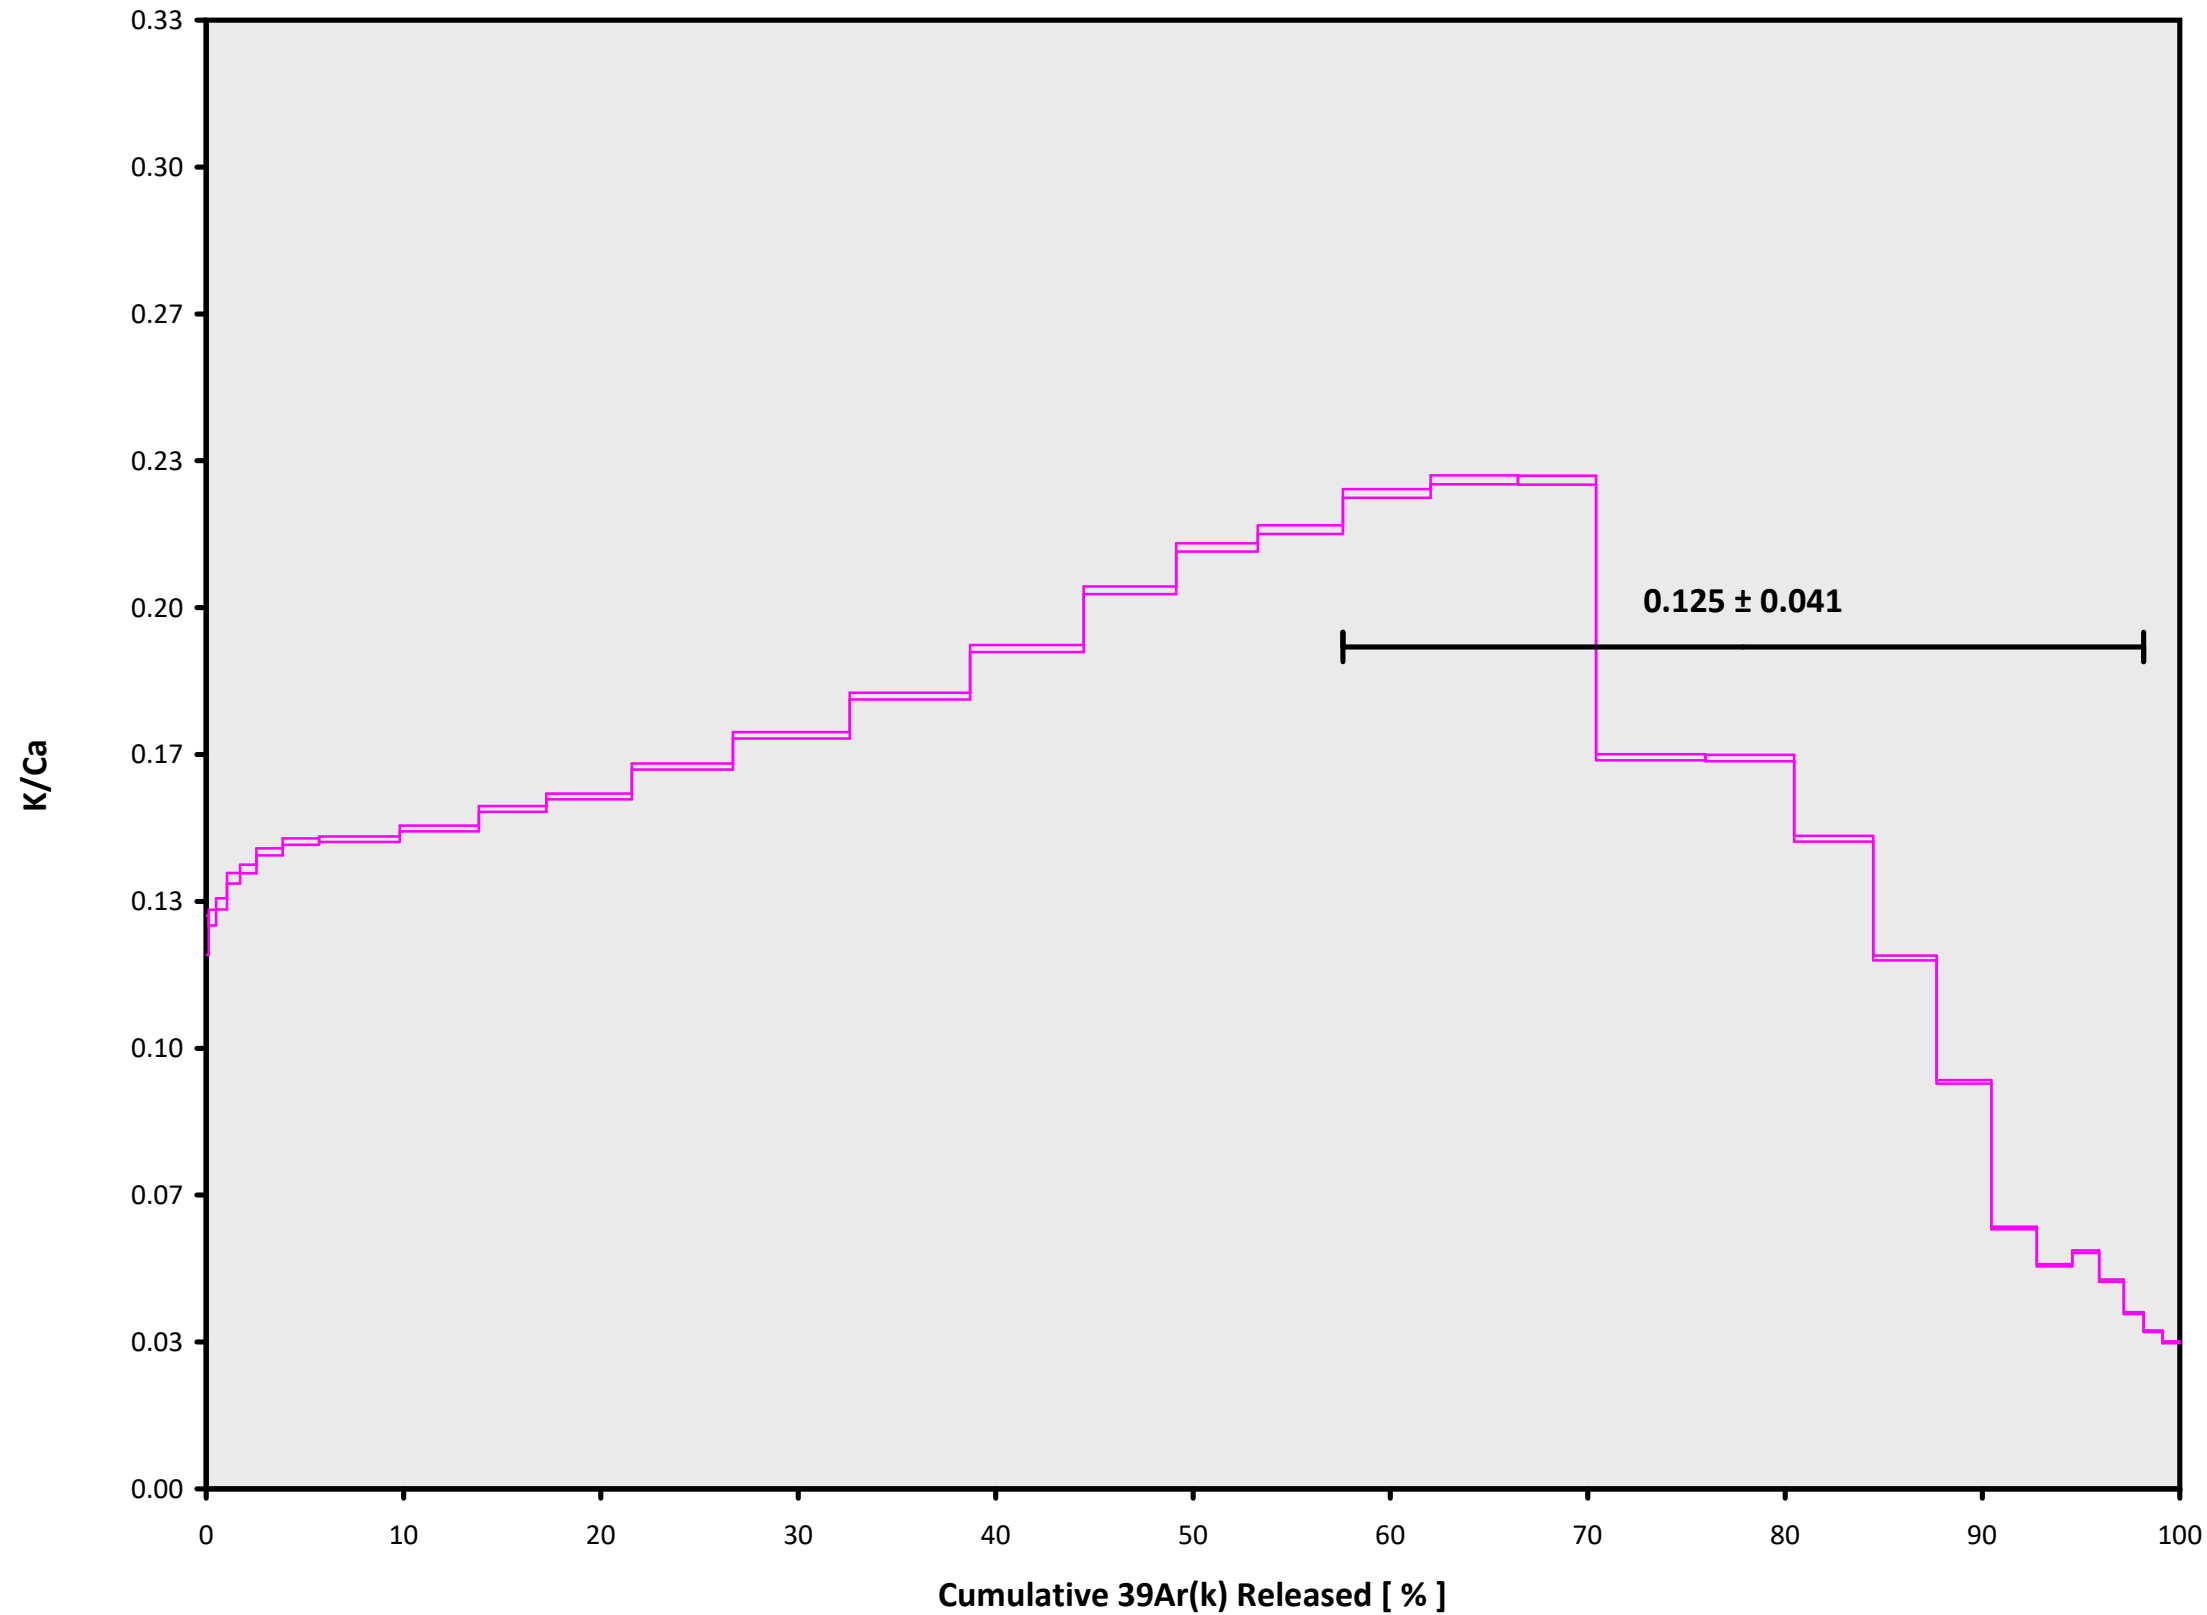

### Ar-Ages in Ma

#### WEIGHTED PLATEAU

17.18 ± 0.07

#### TOTAL FUSION

18.55 ± 0.15

#### NORMAL ISOCHRON

16.85 ± 0.41

#### INVERSE ISOCHRON

16.87 ± 0.41

#### TRAPPED $^{40}\text{Ar}/^{36}\text{Ar}$ RATIO

Standard  $^{40}/^{36} = 298.56 \pm 0.104$   
%SD

### Sample Info

#### GROUNDMASS

Hells Canyon

Dan Miggins

IRR = 23-OSU-01 (1A37-23)

J = 0.00155820 ± 0.00000132

23G08911.AGE >>> LF-21-54 >>> OREGON | MASS (22-34) PROJECT

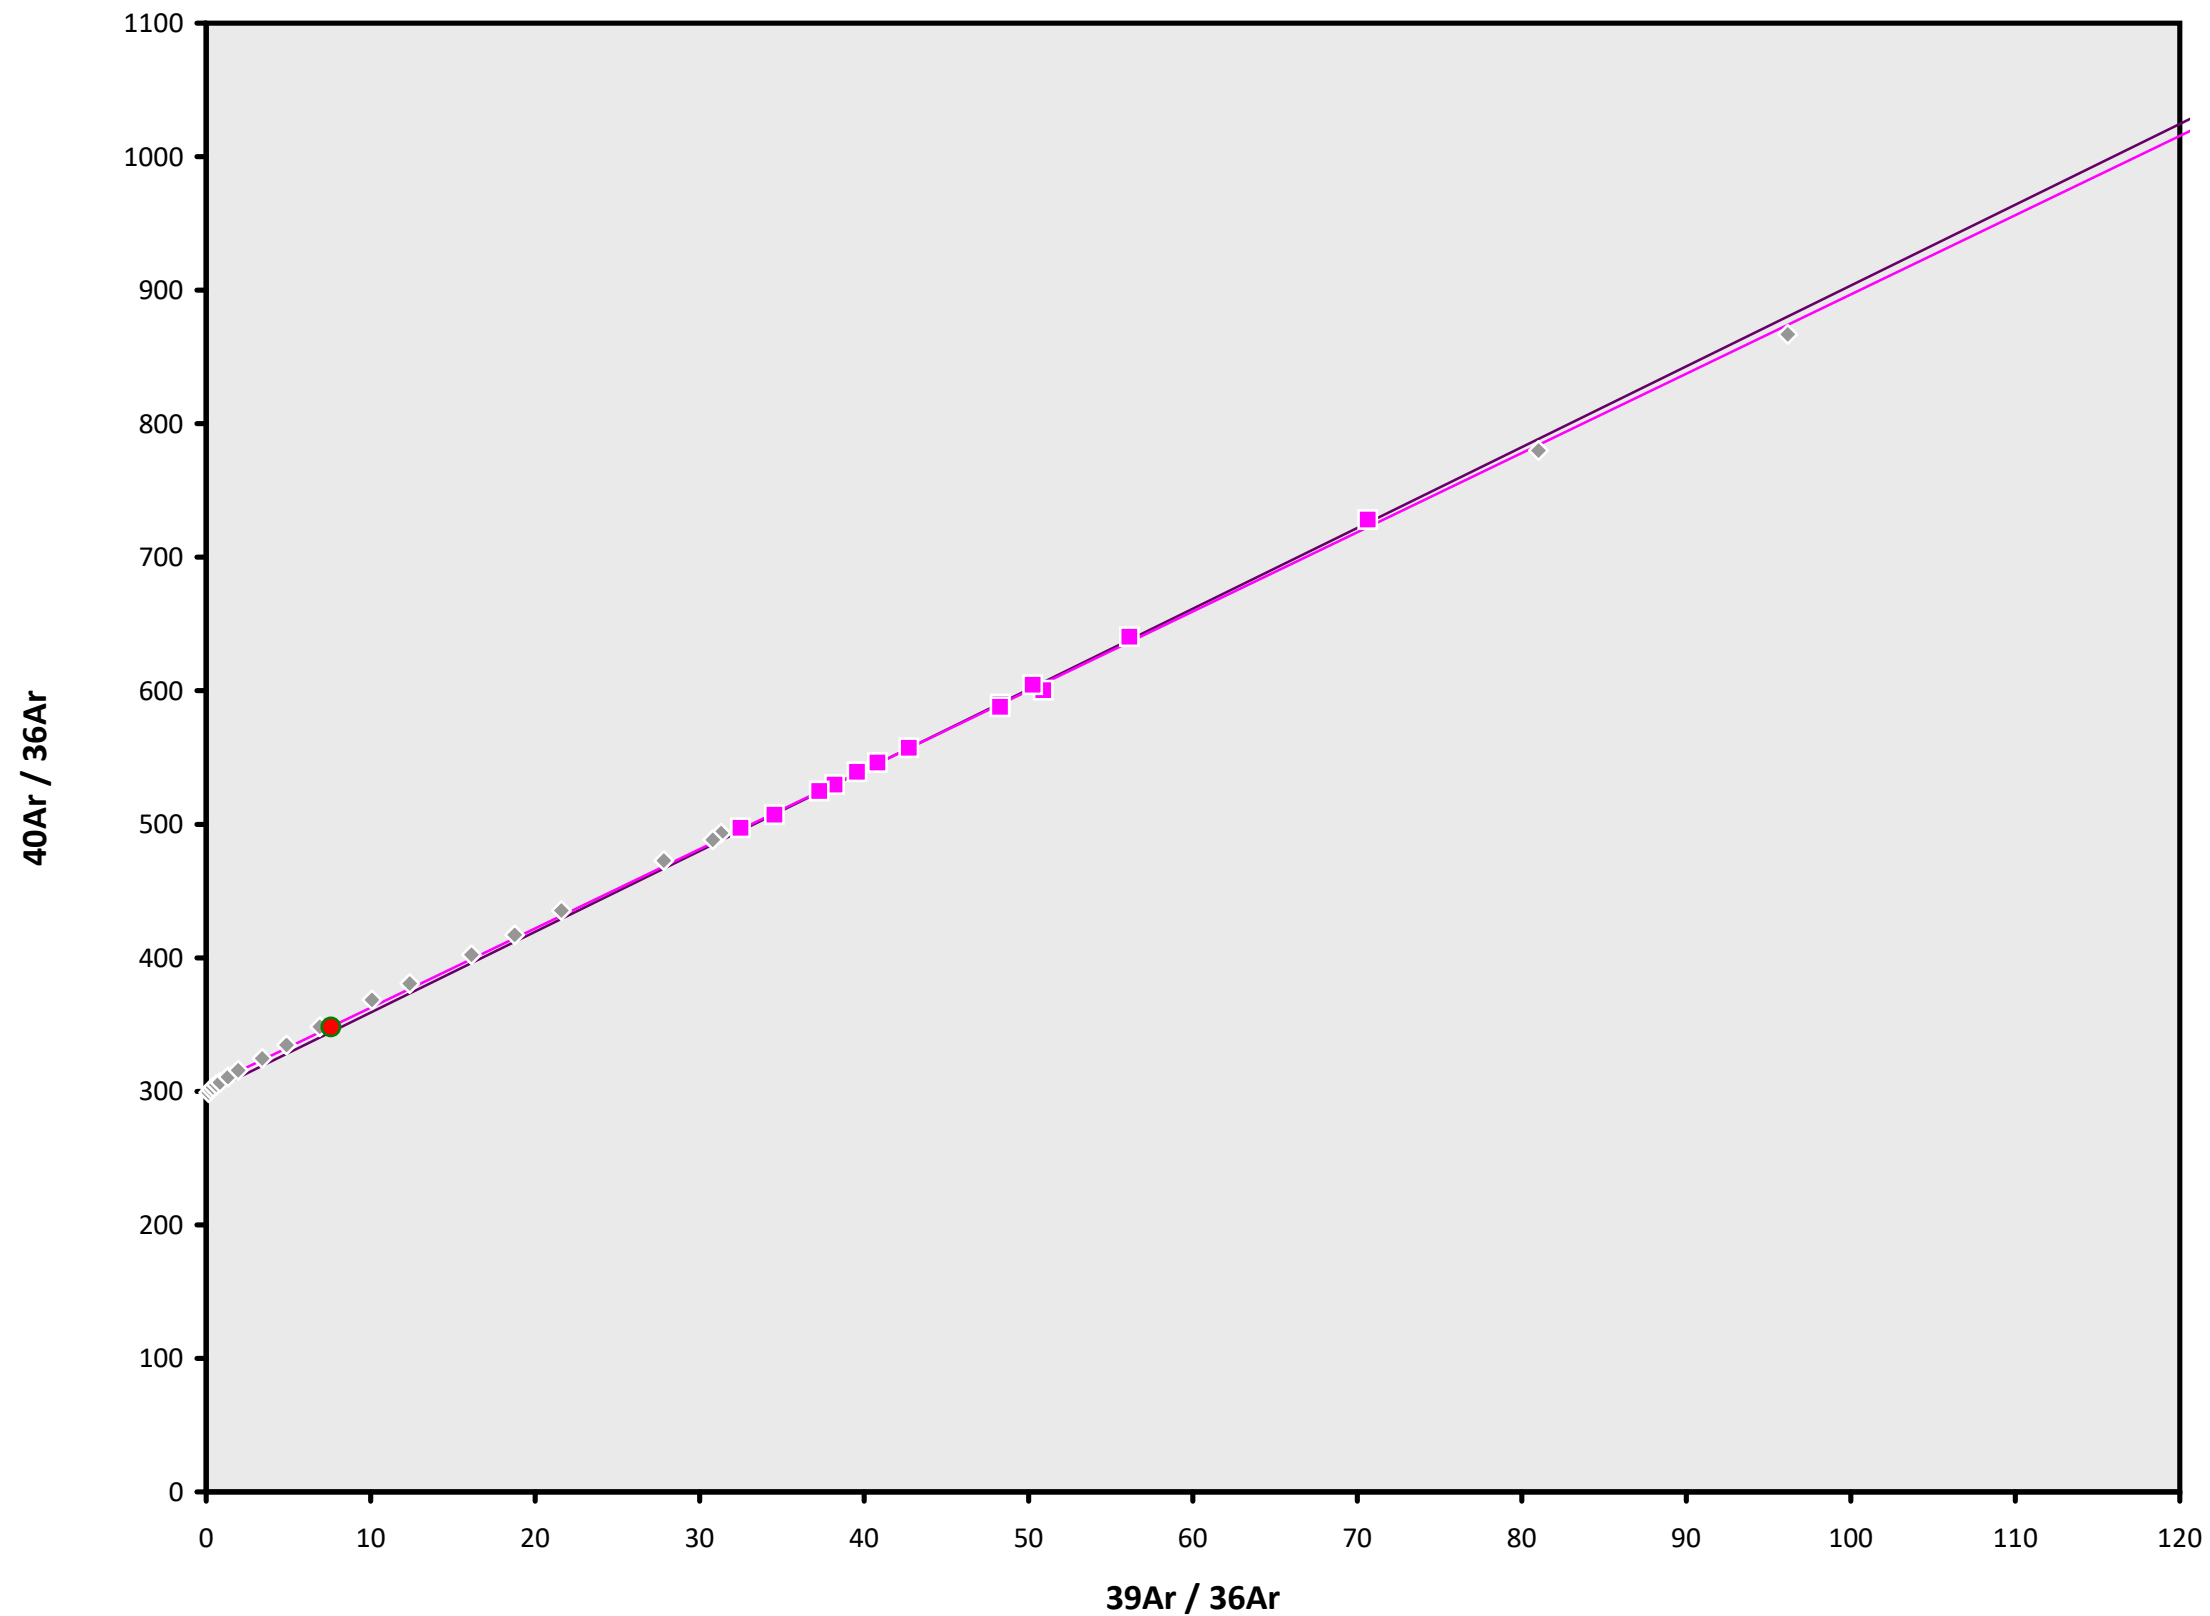

### Ar-Ages in Ma

#### WEIGHTED PLATEAU

$17.18 \pm 0.07$

#### TOTAL FUSION

$18.55 \pm 0.15$

#### NORMAL ISOCHRON

$16.85 \pm 0.41$

#### INVERSE ISOCHRON

$16.87 \pm 0.41$

#### MSWD (PROBABILITY)

1.65 (8%)

#### CALCULATED $40\text{Ar}/36\text{Ar}$

#### INTERCEPT

$303.3 \pm 5.9$

### Sample Info

#### GROUNDMASS

Hells Canyon

Dan Miggins

IRR = 23-OSU-01 (1A37-23)

$J = 0.00155820 \pm 0.00000132$

23G08911.AGE >>> LF-21-54 >>> OREGON | MASS (22-34) PROJECT

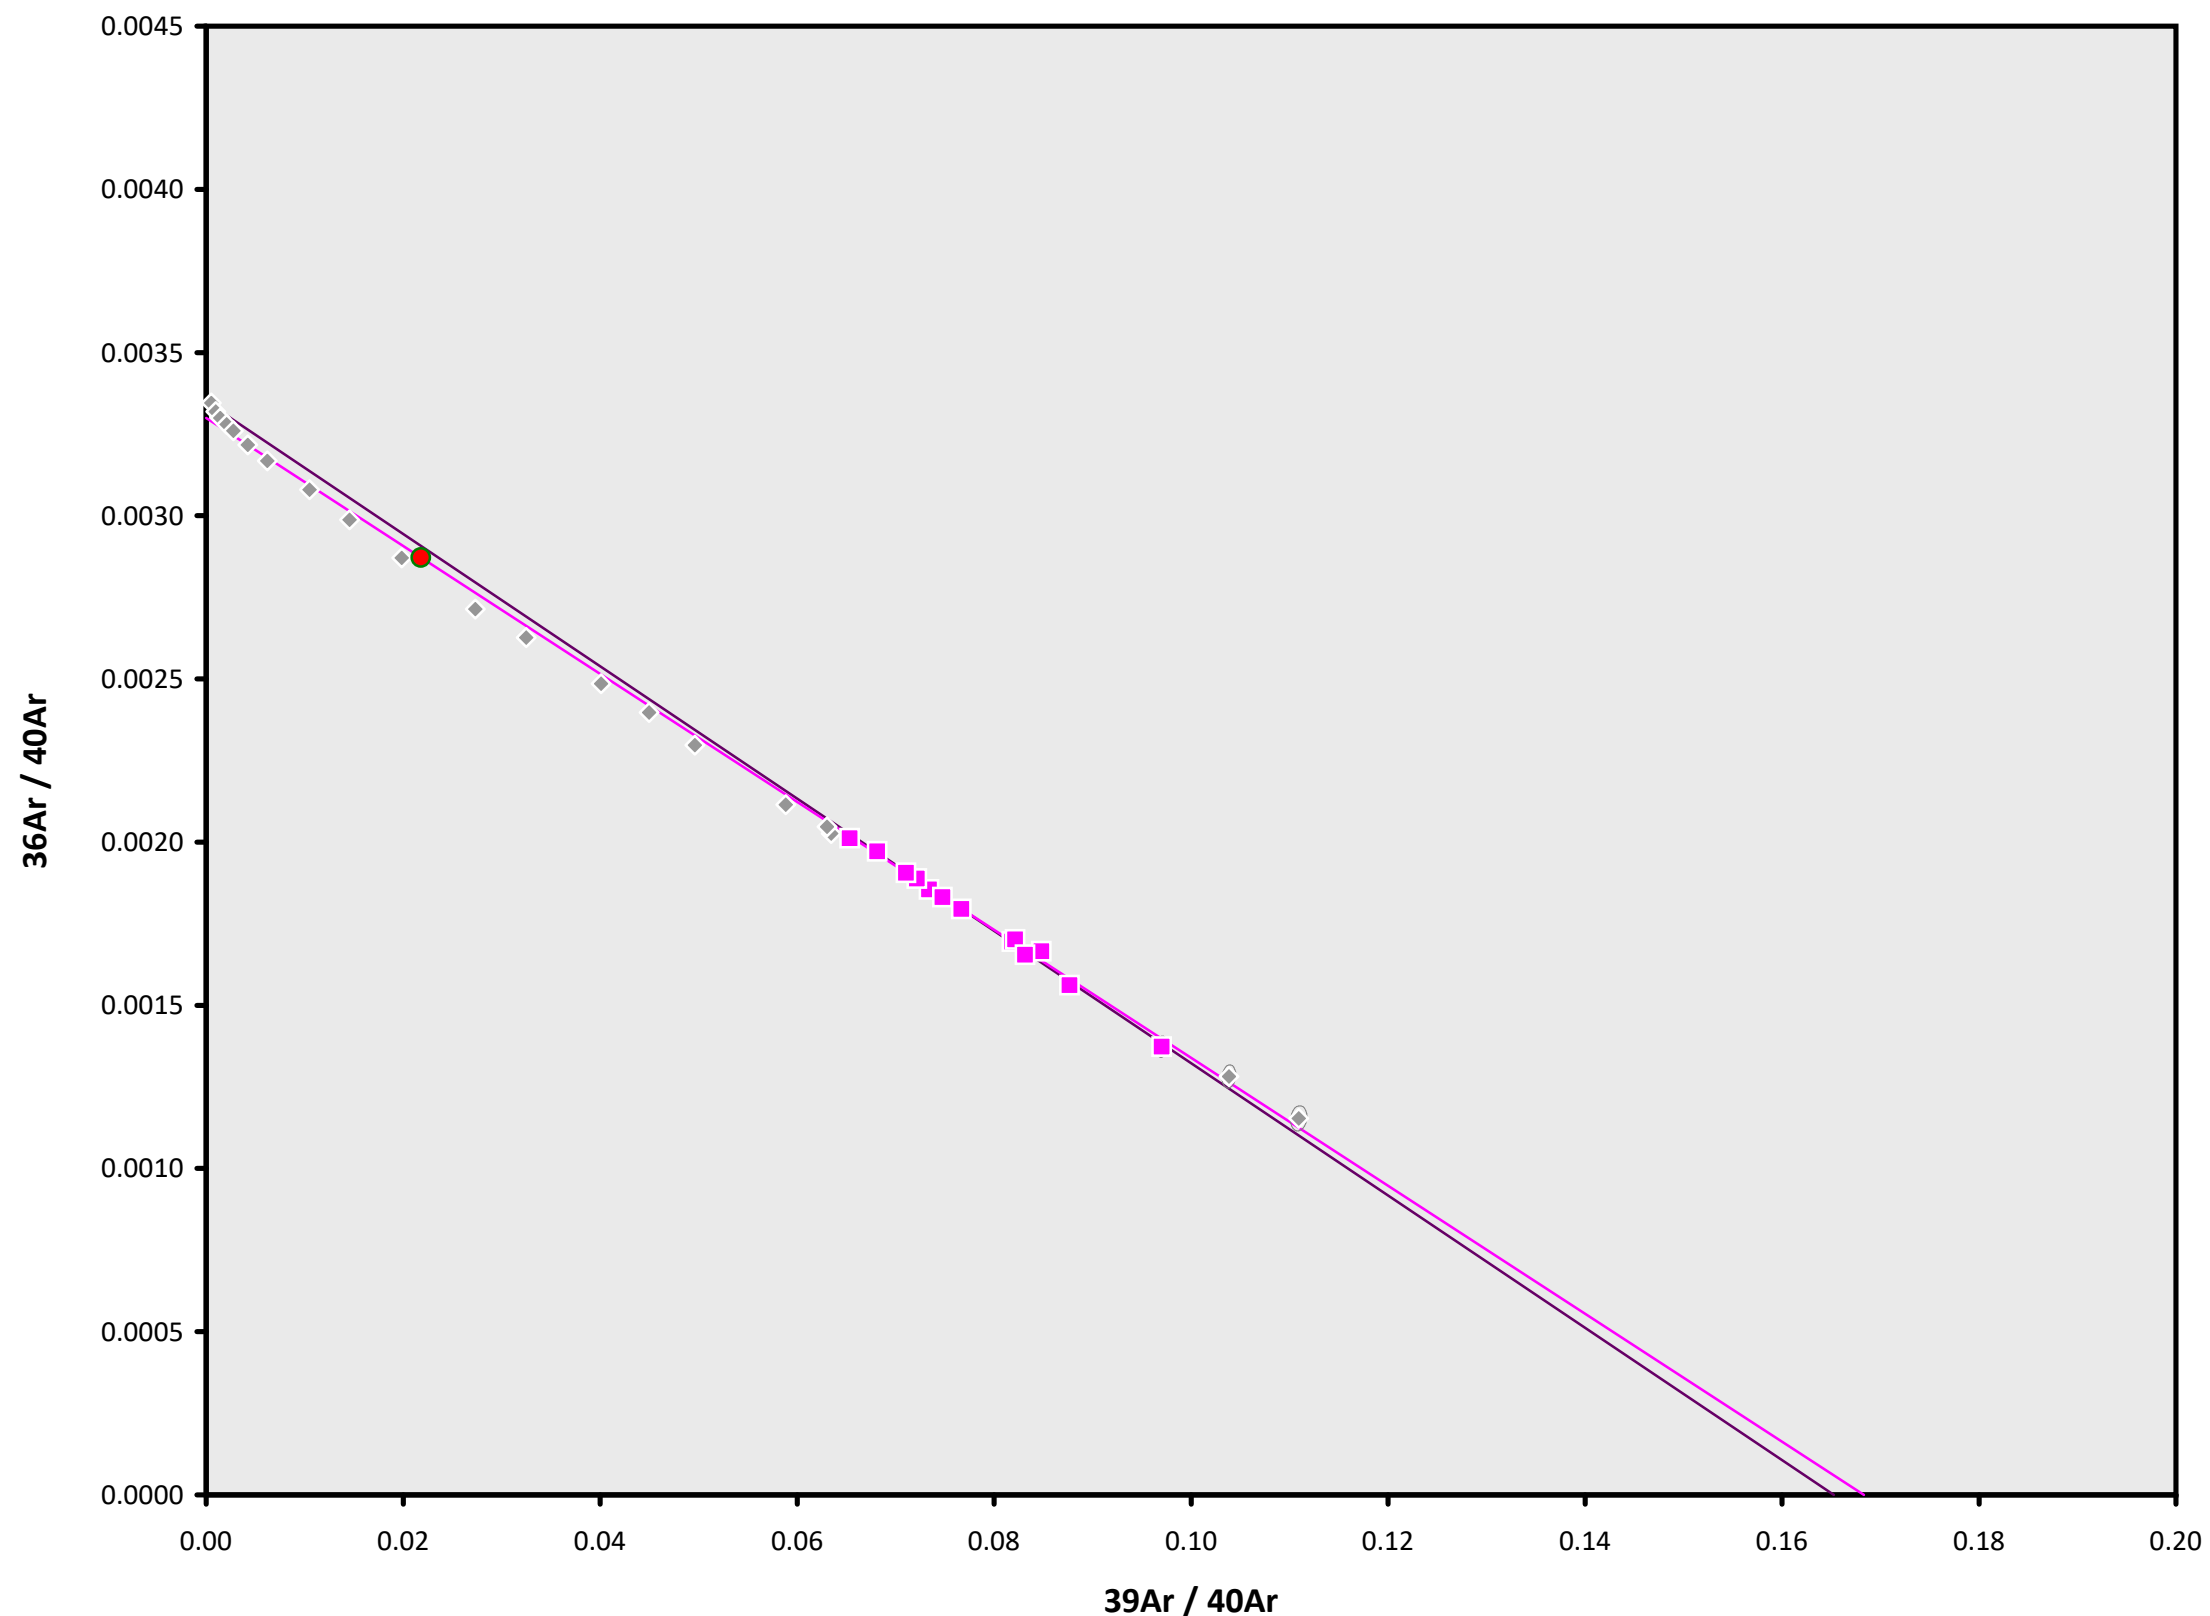

### Ar-Ages in Ma

#### WEIGHTED PLATEAU

$17.18 \pm 0.07$

#### TOTAL FUSION

$18.55 \pm 0.15$

#### NORMAL ISOCHRON

$16.85 \pm 0.41$

#### INVERSE ISOCHRON

$16.87 \pm 0.41$

#### MSWD (PROBABILITY)

1.63 (8%)

#### SPREADING FACTOR

18.8%

#### CALCULATED $^{40}\text{Ar}/^{36}\text{Ar}$

INTERCEPT

$303.1 \pm 5.8$

### Sample Info

#### GROUNDMASS

Hells Canyon

Dan Miggins

IRR = 23-OSU-01 (1A37-23)

$J = 0.00155820 \pm 0.00000132$
