# Supplementary material for: Province-Wide Tapping of a Shallow, Variably Depleted, and Metasomatized Mantle to Generate Earliest Flood Basalt Magmas of the Columbia River Basalt, Northwestern USA
Source: MDPI journal article supplement (doi:10.3390/min13121544), 2023-12-14
Supplement: s1 [file s1]

| Relative Abundances |        | 36Ar<br>[fA] | %1σ   | 37Ar<br>[fA] | %1σ   | 38Ar<br>[fA] | %1σ    | 39Ar<br>[fA] | %1σ   | 40Ar<br>[fA] | %1σ   | 40(r)/39(k) ± 2σ  | Age ± 2σ<br>(Ma) | 40Ar(r)<br>(%) | 39Ar(k)<br>(%) | K/Ca ± 2σ     |
|---------------------|--------|--------------|-------|--------------|-------|--------------|--------|--------------|-------|--------------|-------|-------------------|------------------|----------------|----------------|---------------|
| 23F04031            | 0.7 %  | 0.549964     | 0.339 | 1.4679       | 2.103 | 0.142665     | 7.051  | 2.28238      | 0.378 | 170.1014     | 0.151 | 2.63943 ± 0.55843 | 7.88 ± 1.66      | 3.54           | 0.27           | 0.668 ± 0.029 |
| 23F04033            | 0.9 %  | 0.905748     | 0.268 | 3.1627       | 0.945 | 0.219202     | 4.894  | 4.32680      | 0.223 | 284.1036     | 0.090 | 3.22243 ± 0.37881 | 9.62 ± 1.13      | 4.91           | 0.51           | 0.588 ± 0.011 |
| 23F04034            | 1.2 %  | 0.747665     | 0.301 | 2.8677       | 1.219 | 0.193137     | 5.412  | 3.69985      | 0.259 | 237.3286     | 0.108 | 3.87640 ± 0.40897 | 11.56 ± 1.22     | 6.04           | 0.44           | 0.554 ± 0.014 |
| 23F04035            | 1.8 %  | 2.606271     | 0.211 | 20.8517      | 0.272 | 0.665390     | 1.581  | 16.32578     | 0.081 | 849.5255     | 0.032 | 4.47942 ± 0.22677 | 13.35 ± 0.67     | 8.60           | 1.93           | 0.336 ± 0.002 |
| 23F04037            | 2.3 %  | 2.583319     | 0.210 | 37.3556      | 0.242 | 0.712611     | 1.422  | 21.18940     | 0.068 | 872.3545     | 0.031 | 4.91748 ± 0.17256 | 14.65 ± 0.51     | 11.93          | 2.51           | 0.244 ± 0.001 |
| 23F04038            | 2.8 %  | 2.095100     | 0.216 | 55.5325      | 0.234 | 0.669475     | 1.573  | 24.84168     | 0.065 | 747.7244     | 0.036 | 5.10674 ± 0.12283 | 15.21 ± 0.36     | 16.94          | 2.94           | 0.192 ± 0.001 |
| 23F04039            | 3.4 %  | 1.799517     | 0.218 | 82.5660      | 0.230 | 0.694355     | 1.468  | 31.54992     | 0.057 | 701.6338     | 0.038 | 5.42955 ± 0.08404 | 16.17 ± 0.25     | 24.37          | 3.73           | 0.164 ± 0.001 |
| 23F04041            | 4.0 %  | 1.463182     | 0.232 | 137.5457     | 0.227 | 0.801049     | 1.314  | 46.43230     | 0.053 | 685.0701     | 0.038 | 5.59500 ± 0.04944 | 16.66 ± 0.15     | 37.85          | 5.49           | 0.145 ± 0.001 |
| 23F04042            | 4.7 %  | 1.169053     | 0.251 | 169.1843     | 0.227 | 0.827435     | 1.242  | 53.85297     | 0.052 | 637.5307     | 0.041 | 5.62142 ± 0.03697 | 16.74 ± 0.11     | 47.39          | 6.36           | 0.137 ± 0.001 |
| 23F04043            | 5.3 %  | 0.870289     | 0.265 | 182.9307     | 0.227 | 0.796681     | 1.366  | 55.14901     | 0.052 | 555.0786     | 0.047 | 5.63267 ± 0.02896 | 16.77 ± 0.09     | 55.84          | 6.51           | 0.129 ± 0.001 |
| 23F04045            | 6.0 %  | 0.659342     | 0.310 | 205.8319     | 0.226 | 0.816382     | 1.281  | 58.87688     | 0.051 | 515.1916     | 0.050 | 5.70118 ± 0.02421 | 16.98 ± 0.07     | 65.01          | 6.95           | 0.123 ± 0.001 |
| 23F04046            | 6.8 %  | 0.531939     | 0.338 | 220.1595     | 0.226 | 0.805382     | 1.314  | 60.00493     | 0.051 | 479.9644     | 0.054 | 5.66087 ± 0.02137 | 16.86 ± 0.06     | 70.61          | 7.09           | 0.117 ± 0.001 |
| 23F04047            | 7.5 %  | 0.466734     | 0.384 | 236.7674     | 0.226 | 0.825229     | 1.306  | 61.18549     | 0.051 | 465.3927     | 0.056 | 5.65453 ± 0.02079 | 16.84 ± 0.06     | 74.16          | 7.22           | 0.111 ± 0.001 |
| 23F04049            | 8.3 %  | 0.379725     | 0.428 | 224.5796     | 0.226 | 0.716195     | 1.480  | 55.16501     | 0.052 | 406.1828     | 0.063 | 5.65064 ± 0.02119 | 16.83 ± 0.06     | 76.54          | 6.51           | 0.105 ± 0.000 |
| 23F04050            | 9.1 %  | 0.305017     | 0.474 | 223.6526     | 0.226 | 0.667985     | 1.548  | 51.68692     | 0.053 | 362.6657     | 0.071 | 5.61892 ± 0.02069 | 16.73 ± 0.06     | 79.86          | 6.10           | 0.099 ± 0.000 |
| 23F04051            | 10.1 % | 0.267518     | 0.537 | 231.0929     | 0.226 | 0.647172     | 1.590  | 50.00978     | 0.052 | 341.0373     | 0.075 | 5.61129 ± 0.02116 | 16.71 ± 0.06     | 82.04          | 5.90           | 0.093 ± 0.000 |
| 23F04053            | 10.5 % | 0.159936     | 0.809 | 141.1483     | 0.227 | 0.377725     | 2.861  | 29.65346     | 0.058 | 202.1593     | 0.127 | 5.60779 ± 0.03221 | 16.70 ± 0.10     | 82.01          | 3.50           | 0.090 ± 0.000 |
| 23F04054            | 11.0 % | 0.141692     | 0.892 | 131.7088     | 0.227 | 0.356340     | 2.948  | 26.79762     | 0.061 | 180.4521     | 0.142 | 5.56887 ± 0.03498 | 16.59 ± 0.10     | 82.44          | 3.16           | 0.087 ± 0.000 |
| 23F04055            | 11.5 % | 0.110655     | 1.098 | 115.8798     | 0.228 | 0.292772     | 3.733  | 22.58529     | 0.067 | 148.5367     | 0.172 | 5.54566 ± 0.04029 | 16.52 ± 0.12     | 84.04          | 2.66           | 0.084 ± 0.000 |
| 23F04057            | 12.0 % | 0.089629     | 1.327 | 104.4331     | 0.228 | 0.242964     | 4.236  | 19.54599     | 0.073 | 126.3699     | 0.203 | 5.54580 ± 0.04577 | 16.52 ± 0.14     | 85.48          | 2.31           | 0.080 ± 0.000 |
| 23F04058            | 12.5 % | 0.071276     | 1.641 | 83.1883      | 0.230 | 0.214124     | 5.015  | 15.86950     | 0.076 | 102.3463     | 0.250 | 5.54942 ± 0.05550 | 16.53 ± 0.16     | 85.76          | 1.87           | 0.082 ± 0.000 |
| 23F04059            | 13.0 % | 0.075574     | 1.589 | 74.8892      | 0.231 | 0.188379     | 5.610  | 14.16519     | 0.087 | 94.3853      | 0.271 | 5.51509 ± 0.06322 | 16.43 ± 0.19     | 82.49          | 1.67           | 0.081 ± 0.000 |
| 23F04061            | 14.3 % | 0.085926     | 1.411 | 110.7129     | 0.229 | 0.238358     | 4.637  | 18.01752     | 0.075 | 113.9131     | 0.225 | 5.41517 ± 0.05019 | 16.13 ± 0.15     | 85.31          | 2.12           | 0.070 ± 0.000 |
| 23F04062            | 15.5 % | 0.083247     | 1.436 | 109.0767     | 0.228 | 0.226553     | 4.562  | 16.79723     | 0.075 | 105.4517     | 0.243 | 5.34400 ± 0.05326 | 15.92 ± 0.16     | 84.77          | 1.98           | 0.066 ± 0.000 |
| 23F04063            | 16.5 % | 0.081432     | 1.470 | 100.7020     | 0.229 | 0.201508     | 5.378  | 14.59733     | 0.085 | 93.2447      | 0.274 | 5.30187 ± 0.06130 | 15.79 ± 0.18     | 82.63          | 1.72           | 0.062 ± 0.000 |
| 23F04065            | 17.6 % | 0.068590     | 1.733 | 103.7731     | 0.228 | 0.175872     | 5.670  | 14.20651     | 0.083 | 87.6163      | 0.292 | 5.33982 ± 0.06264 | 15.91 ± 0.19     | 86.18          | 1.67           | 0.059 ± 0.000 |
| 23F04066            | 18.6 % | 0.063598     | 1.794 | 93.3637      | 0.229 | 0.172516     | 6.016  | 12.29492     | 0.091 | 76.5182      | 0.334 | 5.31735 ± 0.07042 | 15.84 ± 0.21     | 85.02          | 1.45           | 0.056 ± 0.000 |
| 23F04067            | 19.8 % | 0.058069     | 2.026 | 88.9106      | 0.230 | 0.155397     | 6.920  | 11.77061     | 0.101 | 72.5184      | 0.353 | 5.32286 ± 0.07506 | 15.86 ± 0.22     | 85.98          | 1.39           | 0.057 ± 0.000 |
| 23F04069            | 21.2 % | 0.083595     | 1.399 | 83.5855      | 0.230 | 0.137934     | 7.242  | 11.08458     | 0.098 | 76.7805      | 0.333 | 5.30884 ± 0.07932 | 15.81 ± 0.24     | 76.27          | 1.31           | 0.057 ± 0.000 |
| 23F04070            | 22.0 % | 0.039648     | 2.853 | 61.3881      | 0.233 | 0.098453     | 10.501 | 8.67787      | 0.118 | 53.7649      | 0.475 | 5.42648 ± 0.09897 | 16.16 ± 0.29     | 87.19          | 1.02           | 0.061 ± 0.000 |
| 23F04071            | 22.9 % | 0.035600     | 3.185 | 56.2266      | 0.234 | 0.097234     | 10.382 | 7.69524      | 0.129 | 47.6648      | 0.537 | 5.42739 ± 0.11176 | 16.17 ± 0.33     | 87.21          | 0.91           | 0.059 ± 0.000 |
| 23F04073            | 23.7 % | 0.030069     | 3.772 | 49.8189      | 0.237 | 0.069710     | 14.577 | 6.70130      | 0.150 | 41.0061      | 0.624 | 5.40465 ± 0.12834 | 16.10 ± 0.38     | 87.90          | 0.79           | 0.058 ± 0.000 |

|   |           |       |           |       |           |       |           |       |           |       |  |  |  |  |  |  |
|---|-----------|-------|-----------|-------|-----------|-------|-----------|-------|-----------|-------|--|--|--|--|--|--|
| Σ | 18.678919 | 0.071 | 3544.3546 | 0.047 | 13.443486 | 0.441 | 847.03926 | 0.012 | 9933.6137 | 0.015 |  |  |  |  |  |  |
|---|-----------|-------|-----------|-------|-----------|-------|-----------|-------|-----------|-------|--|--|--|--|--|--|

| Information on Analysis and Constants Used in Calculations                                                                                                                                                                                                                                                                                                                                                                                                                                                                                                                                                                                                                                                                                                                                                                                                                                                                                                                                                                                             |                                                                                                                                                                                                                                                                                                                                                                                                                                                                                                                                                                                                                                                                                                                                                                                                                                                                                                                                                                                                                                                                                                                         |
|--------------------------------------------------------------------------------------------------------------------------------------------------------------------------------------------------------------------------------------------------------------------------------------------------------------------------------------------------------------------------------------------------------------------------------------------------------------------------------------------------------------------------------------------------------------------------------------------------------------------------------------------------------------------------------------------------------------------------------------------------------------------------------------------------------------------------------------------------------------------------------------------------------------------------------------------------------------------------------------------------------------------------------------------------------|-------------------------------------------------------------------------------------------------------------------------------------------------------------------------------------------------------------------------------------------------------------------------------------------------------------------------------------------------------------------------------------------------------------------------------------------------------------------------------------------------------------------------------------------------------------------------------------------------------------------------------------------------------------------------------------------------------------------------------------------------------------------------------------------------------------------------------------------------------------------------------------------------------------------------------------------------------------------------------------------------------------------------------------------------------------------------------------------------------------------------|
| Project = <b>MASS (22-34)</b><br>Sample = <b>LMF-19-80</b><br>Material = <b>Groundmass</b><br>Location = <b>Leslie Gulch</b><br>Region = <b>Vale</b><br>Analyst = <b>Dan Miggins</b><br>Irradiation = <b>22-OSU-05 (5D20-22)</b><br>Position = <b>X: 999   Y: 999   Z/H: 34.83193 mm</b><br>FCT-NM Age = <b>28.201 ± 0.023 Ma</b><br>FCT-NM Reference = <b>Kuiper et al (2008)</b><br>FCT-NM 40Ar/39Ar Ratio = <b>9.49923 ± 0.01026</b><br>FCT-NM J-value = <b>0.00163439 ± 0.00000177</b><br>Air Shot 40Ar/36Ar = <b>303.1280 ± 0.4698</b><br>Air Shot MDF = <b>0.99622775 ± 0.00046021 (LIN)</b><br>Experiment Type = <b>Incremental Heating</b><br>Extraction Method = <b>Bulk Laser Heating</b><br>Heating = <b>50 sec</b><br>Isolation = <b>6.00 min</b><br>Instrument = <b>ARGUS-VI-F</b><br>Preferred Age = <b>Mini Plateau</b><br>Age Classification = <b>Crystallization Age</b><br>IGSN = <b>Undefined</b><br>Rock Class = <b>Igneous&gt;Volcanic&gt;Mafic</b><br>Lithology = <b>Basaltic Lava</b><br>Lat-Lon = <b>Undefined - Undefined</b> | Age Equations = <b>Min et al. (2000)</b><br>Negative Intensities = <b>Allowed</b><br>Collector Calibrations = <b>36Ar</b><br>Decay 40K(total) = <b>5.463 ± 0.107 E-10 1/a</b><br>Decay 40K(EC,β <sup>+</sup> ) = <b>0.580 ± 0.014 E-10 1/a</b><br>Decay 40K(β <sup>-</sup> ) = <b>4.884 ± 0.099 E-10 1/a</b><br>Decay 39Ar = <b>2.940 ± 0.016 E-07 1/h</b><br>Decay 37Ar = <b>8.230 ± 0.012 E-04 1/h</b><br>Decay 36Cl = <b>2.257 ± 0.015 E-06 1/a</b><br>Production 39/37(ca) = <b>0.0006425 ± 0.0000059</b><br>Production 38/37(ca) = <b>0.0001800 ± 0.0000173</b><br>Production 36/37(ca) = <b>0.0002703 ± 0.0000005</b><br>Production 40/39(k) = <b>0.000607 ± 0.000059</b><br>Production 38/39(k) = <b>0.012077 ± 0.000011</b><br>Production 36/38(cl) = <b>262.80 ± 1.71</b><br>Scaling Ratio K/Ca = <b>0.430</b><br>Abundance Ratio 40K/K = <b>1.1700 ± 0.0100 E-04</b><br>Atomic Weight K = <b>39.0983 ± 0.0001 g</b><br>Trapped 40/36(a) = <b>298.56 ± 0.31</b><br>Trapped 38/36(a) = <b>0.1885 ± 0.0003</b><br>Standard MDF 40/36(a) = <b>298.56 ± 0.31</b><br>Standard MDF Reference = <b>Lee et al 2006</b> |

| Results                                | 40(a)/36(a) ± 2σ         | 40(r)/39(k) ± 2σ             | Age ± 2σ<br>(Ma)                                                                               | MSWD       | 39Ar(k)<br>(%,n) | K/Ca ± 2σ     |
|----------------------------------------|--------------------------|------------------------------|------------------------------------------------------------------------------------------------|------------|------------------|---------------|
| Age Plateau<br><b>Error Mean</b>       |                          | 5.65547 ± 0.02028<br>± 0.36% | <b>16.84 ± 0.07</b><br>± <b>0.42%</b><br>Full External Error ± 0.88<br>Analytical Error ± 0.06 | 4.43<br>0% | 46.14<br>7       | 0.124 ± 0.011 |
| Total Fusion Age                       |                          | 5.49546 ± 0.01079<br>± 0.20% | <b>16.37 ± 0.05</b><br>± <b>0.29%</b><br>Full External Error ± 0.85<br>Analytical Error ± 0.03 |            | 32               | 0.102 ± 0.000 |
| Normal Isochron<br><b>Error Chron</b>  | 296.20 ± 3.04<br>± 1.03% | 5.67900 ± 0.03629<br>± 0.64% | <b>16.91 ± 0.11</b><br>± <b>0.67%</b><br>Full External Error ± 0.88<br>Analytical Error ± 0.11 | 3.92<br>0% | 46.14<br>7       | 0.124 ± 0.011 |
| Inverse Isochron<br><b>Error Chron</b> | 296.16 ± 3.07<br>± 1.04% | 5.67976 ± 0.03670<br>± 0.65% | <b>16.91 ± 0.11</b><br>± <b>0.68%</b><br>Full External Error ± 0.88<br>Analytical Error ± 0.11 | 3.99<br>0% | 46.14<br>7       | 0.124 ± 0.011 |

| Inverse Isochron | 39(k)/40(a+r) ± 2σ | 36(a)/40(a+r) ± 2σ    |
|------------------|--------------------|-----------------------|
| 23F04031         | 0.7 %              | 0.0134123 ± 0.0001091 |
| 23F04033         | 0.9 %              | 0.0152226 ± 0.0000732 |
| 23F04034         | 1.2 %              | 0.0155819 ± 0.0000874 |
| 23F04035         | 1.8 %              | 0.0192020 ± 0.0000333 |
| 23F04037         | 2.3 %              | 0.0242627 ± 0.0000362 |
| 23F04038         | 2.8 %              | 0.0331760 ± 0.0000493 |
| 23F04039         | 3.4 %              | 0.0448920 ± 0.0000619 |
| 23F04041         | 4.0 %              | 0.0676512 ± 0.0000891 |
| 23F04042         | 4.7 %              | 0.0843050 ± 0.0001122 |
| 23F04043         | 5.3 %              | 0.0991477 ± 0.0001390 |
| 23F04045         | 6.0 %              | 0.1140327 ± 0.0001643 |
| 23F04046         | 6.8 %              | 0.1247343 ± 0.0001854 |
| 23F04047         | 7.5 %              | 0.1311542 ± 0.0001978 |
| 23F04049         | 8.3 %              | 0.1354692 ± 0.0002224 |
| 23F04050         | 9.1 %              | 0.1421355 ± 0.0002522 |
| 23F04051         | 10.1 %             | 0.1462178 ± 0.0002688 |
| 23F04053         | 10.5 %             | 0.1462480 ± 0.0004085 |
| 23F04054         | 11.0 %             | 0.1480470 ± 0.0004576 |
| 23F04055         | 11.5 %             | 0.1515646 ± 0.0005613 |
| 23F04057         | 12.0 %             | 0.1541563 ± 0.0006638 |
| 23F04058         | 12.5 %             | 0.1545491 ± 0.0008089 |
| 23F04059         | 13.0 %             | 0.1495822 ± 0.0008519 |
| 23F04061         | 14.3 %             | 0.1575596 ± 0.0007467 |
| 23F04062         | 15.5 %             | 0.1586391 ± 0.0008064 |
| 23F04063         | 16.5 %             | 0.1558696 ± 0.0008963 |
| 23F04065         | 17.6 %             | 0.1613994 ± 0.0009804 |
| 23F04066         | 18.6 %             | 0.1599113 ± 0.0011083 |
| 23F04067         | 19.8 %             | 0.1615402 ± 0.0011856 |
| 23F04069         | 21.2 %             | 0.1436803 ± 0.0009985 |
| 23F04070         | 22.0 %             | 0.1606862 ± 0.0015749 |
| 23F04071         | 22.9 %             | 0.1607027 ± 0.0017757 |
| 23F04073         | 23.7 %             | 0.1626576 ± 0.0020875 |

| Results                                | 40(a)/36(a) ± 2σ                                                                        | 40(r)/39(k) ± 2σ             | Age ± 2σ<br>(Ma)                                                                               |
|----------------------------------------|-----------------------------------------------------------------------------------------|------------------------------|------------------------------------------------------------------------------------------------|
| Inverse Isochron<br><b>Error Chron</b> | 296.16 ± 3.07<br>± 1.04%                                                                | 5.67976 ± 0.03670<br>± 0.65% | <b>16.91 ± 0.11</b><br>± <b>0.68%</b><br>Full External Error ± 0.88<br>Analytical Error ± 0.11 |
| Statistics                             | 2σ Confidence Limit<br>Error Magnification<br>Number of Data Points<br>Spreading Factor | 2.26<br>1.9972<br>7<br>38.5% | Convergence<br>Number of Iterations<br>Calculated Line<br>Weighted                             |

| r.i.   |
|--------|
| 0.1499 |
| 0.1201 |
| 0.1304 |
| 0.0544 |
| 0.0608 |
| 0.0782 |
| 0.0932 |
| 0.0928 |
| 0.0972 |
| 0.1095 |
| 0.1024 |
| 0.1012 |
| 0.0907 |
| 0.0950 |
| 0.0946 |
| 0.0871 |
| 0.1072 |
| 0.1084 |
| 0.1039 |
| 0.0976 |
| 0.0991 |
| 0.1179 |
| 0.0977 |
| 0.1034 |
| 0.1175 |
| 0.0950 |
| 0.1076 |
| 0.0974 |
| 0.1638 |
| 0.0935 |
| 0.0934 |
| 0.0883 |

| MSWD   |
|--------|
| 3.99   |
| 0%     |
| 119103 |
| 2      |
| York-2 |

| Incremental Heating |        | 36Ar(a)<br>[fA] | 37Ar(ca)<br>[fA] | 38Ar(cl)<br>[fA] | 39Ar(k)<br>[fA] | 40Ar(r)<br>[fA] | Age ± 2σ<br>(Ma) | 40Ar(r)<br>(%) | 39Ar(k)<br>(%) | K/Ca ± 2σ     |
|---------------------|--------|-----------------|------------------|------------------|-----------------|-----------------|------------------|----------------|----------------|---------------|
| 23F04031            | 0.7 %  | 0.549566        | 1.4679           | 0.0112548        | 2.28144         | 6.0217          | 7.88 ± 1.66      | 3.54           | 0.27           | 0.668 ± 0.029 |
| 23F04033            | 0.9 %  | 0.904893        | 3.1627           | 0.0000000        | 4.32476         | 13.9362         | 9.62 ± 1.13      | 4.91           | 0.51           | 0.588 ± 0.011 |
| 23F04034            | 1.2 %  | 0.746890        | 2.8677           | 0.0071716        | 3.69800         | 14.3350         | 11.56 ± 1.22     | 6.04           | 0.44           | 0.554 ± 0.014 |
| 23F04035            | 1.8 %  | 2.600635        | 20.8517          | 0.0000000        | 16.31238        | 73.0700         | 13.35 ± 0.67     | 8.60           | 1.93           | 0.336 ± 0.002 |
| 23F04037            | 2.3 %  | 2.573222        | 37.3556          | 0.0000000        | 21.16540        | 104.0805        | 14.65 ± 0.51     | 11.93          | 2.51           | 0.244 ± 0.001 |
| 23F04038            | 2.8 %  | 2.080089        | 55.5325          | 0.0000000        | 24.80600        | 126.6779        | 15.21 ± 0.36     | 16.94          | 2.94           | 0.192 ± 0.001 |
| 23F04039            | 3.4 %  | 1.777200        | 82.5660          | 0.0000000        | 31.49688        | 171.0140        | 16.17 ± 0.25     | 24.37          | 3.73           | 0.164 ± 0.001 |
| 23F04041            | 4.0 %  | ✓ 1.426003      | 137.5457         | 0.0000000        | 46.34393        | 259.2945        | 16.66 ± 0.15     | 37.85          | 5.49           | 0.145 ± 0.001 |
| 23F04042            | 4.7 %  | ✓ 1.123322      | 169.1843         | 0.0000000        | 53.74427        | 302.1189        | 16.74 ± 0.11     | 47.39          | 6.36           | 0.137 ± 0.001 |
| 23F04043            | 5.3 %  | ✓ 0.820843      | 182.9307         | 0.0000000        | 55.03148        | 309.9744        | 16.77 ± 0.09     | 55.84          | 6.51           | 0.129 ± 0.001 |
| 23F04045            | 6.0 %  | ✓ 0.603706      | 205.8319         | 0.0000000        | 58.74463        | 334.9135        | 16.98 ± 0.07     | 65.01          | 6.95           | 0.123 ± 0.001 |
| 23F04046            | 6.8 %  | ✓ 0.472430      | 220.1595         | 0.0000000        | 59.86348        | 338.8794        | 16.86 ± 0.06     | 70.61          | 7.09           | 0.117 ± 0.001 |
| 23F04047            | 7.5 %  | ✓ 0.402736      | 236.7674         | 0.0000000        | 61.03337        | 345.1147        | 16.84 ± 0.06     | 74.16          | 7.22           | 0.111 ± 0.001 |
| 23F04049            | 8.3 %  | ✓ 0.319021      | 224.5796         | 0.0000000        | 55.02072        | 310.9024        | 16.83 ± 0.06     | 76.54          | 6.51           | 0.105 ± 0.000 |
| 23F04050            | 9.1 %  | 0.244564        | 223.6526         | 0.0000000        | 51.54323        | 289.6174        | 16.73 ± 0.06     | 79.86          | 6.10           | 0.099 ± 0.000 |
| 23F04051            | 10.1 % | 0.205053        | 231.0929         | 0.0000000        | 49.86131        | 279.7863        | 16.71 ± 0.06     | 82.04          | 5.90           | 0.093 ± 0.000 |
| 23F04053            | 10.5 % | 0.121783        | 141.1483         | 0.0000000        | 29.56278        | 165.7817        | 16.70 ± 0.10     | 82.01          | 3.50           | 0.090 ± 0.000 |
| 23F04054            | 11.0 % | 0.106091        | 131.7088         | 0.0000000        | 26.71300        | 148.7612        | 16.59 ± 0.10     | 82.44          | 3.16           | 0.087 ± 0.000 |
| 23F04055            | 11.5 % | 0.079333        | 115.8798         | 0.0000000        | 22.51083        | 124.8375        | 16.52 ± 0.12     | 84.04          | 2.66           | 0.084 ± 0.000 |
| 23F04057            | 12.0 % | 0.061401        | 104.4331         | 0.0000000        | 19.47889        | 108.0261        | 16.52 ± 0.14     | 85.48          | 2.31           | 0.080 ± 0.000 |
| 23F04058            | 12.5 % | 0.048790        | 83.1883          | 0.0000000        | 15.81605        | 87.7699         | 16.53 ± 0.16     | 85.76          | 1.87           | 0.082 ± 0.000 |
| 23F04059            | 13.0 % | 0.055331        | 74.8892          | 0.0000000        | 14.11708        | 77.8570         | 16.43 ± 0.19     | 82.49          | 1.67           | 0.081 ± 0.000 |
| 23F04061            | 14.3 % | 0.056000        | 110.7129         | 0.0000000        | 17.94638        | 97.1828         | 16.13 ± 0.15     | 85.31          | 2.12           | 0.070 ± 0.000 |
| 23F04062            | 15.5 % | 0.053764        | 109.0767         | 0.0000000        | 16.72714        | 89.3898         | 15.92 ± 0.16     | 84.77          | 1.98           | 0.066 ± 0.000 |
| 23F04063            | 16.5 % | 0.054212        | 100.7020         | 0.0000000        | 14.53263        | 77.0502         | 15.79 ± 0.18     | 82.63          | 1.72           | 0.062 ± 0.000 |
| 23F04065            | 17.6 % | 0.040540        | 103.7731         | 0.0000000        | 14.13983        | 75.5042         | 15.91 ± 0.19     | 86.18          | 1.67           | 0.059 ± 0.000 |
| 23F04066            | 18.6 % | 0.038362        | 93.3637          | 0.0007180        | 12.23494        | 65.0574         | 15.84 ± 0.21     | 85.02          | 1.45           | 0.056 ± 0.000 |
| 23F04067            | 19.8 % | 0.034037        | 88.9106          | 0.0000000        | 11.71348        | 62.3492         | 15.86 ± 0.22     | 85.98          | 1.39           | 0.057 ± 0.000 |
| 23F04069            | 21.2 % | 0.061001        | 83.5855          | 0.0000000        | 11.03088        | 58.5612         | 15.81 ± 0.24     | 76.27          | 1.31           | 0.057 ± 0.000 |
| 23F04070            | 22.0 % | 0.023055        | 61.3881          | 0.0000000        | 8.63843         | 46.8763         | 16.16 ± 0.29     | 87.19          | 1.02           | 0.061 ± 0.000 |
| 23F04071            | 22.9 % | 0.020402        | 56.2266          | 0.0000000        | 7.65912         | 41.5691         | 16.17 ± 0.33     | 87.21          | 0.91           | 0.059 ± 0.000 |
| 23F04073            | 23.7 % | 0.016602        | 49.8189          | 0.0000000        | 6.66930         | 36.0452         | 16.10 ± 0.38     | 87.90          | 0.79           | 0.058 ± 0.000 |

Σ 17.720878 3544.3546 0.0191444 844.76202 4642.3556

| Information on Analysis                                                                                                                                                                                                                                                                                     |
|-------------------------------------------------------------------------------------------------------------------------------------------------------------------------------------------------------------------------------------------------------------------------------------------------------------|
| Project = <b>MASS (22-34)</b><br>Sample = <b>LMF-19-80</b><br>Material = <b>Groundmass</b><br>Location = <b>Leslie Gulch</b><br>Region = <b>Vale</b><br>Analyst = <b>Dan Miggins</b><br>Irradiation = <b>22-OSU-05 (5D20-22)</b><br>J = <b>0.00163439 ± 0.00000177</b><br>FCT-NM = <b>28.201 ± 0.023 Ma</b> |

| Results                   | 40(r)/39(k) ± 2σ             | Age ± 2σ<br>(Ma)                                      | MSWD                             | 39Ar(k)<br>(%,n)                           | K/Ca ± 2σ     |
|---------------------------|------------------------------|-------------------------------------------------------|----------------------------------|--------------------------------------------|---------------|
| Age Plateau<br>Error Mean | 5.65547 ± 0.02028<br>± 0.36% | 16.84 ± 0.07<br>± 0.42%                               | 4.43<br>0%                       | 46.14<br>7                                 | 0.124 ± 0.011 |
|                           |                              | Full External Error ± 0.88<br>Analytical Error ± 0.06 | 2.15<br>2.1048                   | 2σ Confidence Limit<br>Error Magnification |               |
| Total Fusion Age          | 5.49546 ± 0.01079<br>± 0.20% | 16.37 ± 0.05<br>± 0.29%                               |                                  | 32                                         | 0.102 ± 0.000 |
|                           |                              | Full External Error ± 0.85<br>Analytical Error ± 0.03 | ■ Defining a mini plateau at 46% |                                            |               |

| Normal Isochron |        | 39(k)/36(a) ± 2σ | 40(a+r)/36(a) ± 2σ | r.i.   |
|-----------------|--------|------------------|--------------------|--------|
| 23F04031        | 0.7 %  | 4.15 ± 0.04      | 309.52 ± 2.30      | 0.6113 |
| 23F04033        | 0.9 %  | 4.78 ± 0.03      | 313.96 ± 1.78      | 0.7291 |
| 23F04034        | 1.2 %  | 4.95 ± 0.04      | 317.75 ± 2.03      | 0.7137 |
| 23F04035        | 1.8 %  | 6.27 ± 0.03      | 326.66 ± 1.40      | 0.9240 |
| 23F04037        | 2.3 %  | 8.23 ± 0.04      | 339.01 ± 1.44      | 0.9417 |
| 23F04038        | 2.8 %  | 11.93 ± 0.05     | 359.46 ± 1.58      | 0.9453 |
| 23F04039        | 3.4 %  | 17.72 ± 0.08     | 394.79 ± 1.77      | 0.9535 |
| 23F04041        | 4.0 %  | ✓ 32.50 ± 0.16   | 480.39 ± 2.32      | 0.9633 |
| 23F04042        | 4.7 %  | ✓ 47.84 ± 0.26   | 567.51 ± 3.01      | 0.9687 |
| 23F04043        | 5.3 %  | ✓ 67.04 ± 0.38   | 676.19 ± 3.86      | 0.9700 |
| 23F04045        | 6.0 %  | ✓ 97.31 ± 0.67   | 853.32 ± 5.85      | 0.9779 |
| 23F04046        | 6.8 %  | ✓ 126.71 ± 0.98  | 1015.87 ± 7.84     | 0.9814 |
| 23F04047        | 7.5 %  | ✓ 151.55 ± 1.36  | 1155.48 ± 10.41    | 0.9860 |
| 23F04049        | 8.3 %  | ✓ 172.47 ± 1.77  | 1273.11 ± 13.13    | 0.9873 |
| 23F04050        | 9.1 %  | 210.76 ± 2.52    | 1482.78 ± 17.77    | 0.9890 |
| 23F04051        | 10.1 % | 243.16 ± 3.44    | 1663.02 ± 23.60    | 0.9916 |
| 23F04053        | 10.5 % | 242.75 ± 5.18    | 1659.84 ± 35.63    | 0.9915 |
| 23F04054        | 11.0 % | 251.79 ± 6.03    | 1700.76 ± 40.94    | 0.9917 |
| 23F04055        | 11.5 % | 283.75 ± 8.72    | 1872.16 ± 57.87    | 0.9928 |
| 23F04057        | 12.0 % | 317.24 ± 12.33   | 2057.91 ± 80.33    | 0.9939 |
| 23F04058        | 12.5 % | 324.16 ± 15.57   | 2097.48 ± 101.25   | 0.9941 |
| 23F04059        | 13.0 % | 255.14 ± 11.09   | 1705.67 ± 74.68    | 0.9915 |
| 23F04061        | 14.3 % | 320.47 ± 13.92   | 2033.96 ± 88.77    | 0.9941 |
| 23F04062        | 15.5 % | 311.12 ± 13.88   | 1961.20 ± 87.96    | 0.9936 |
| 23F04063        | 16.5 % | 268.07 ± 11.87   | 1719.82 ± 76.70    | 0.9917 |
| 23F04065        | 17.6 % | 348.79 ± 20.51   | 2161.03 ± 127.67   | 0.9947 |
| 23F04066        | 18.6 % | 318.93 ± 19.02   | 1994.44 ± 119.62   | 0.9933 |
| 23F04067        | 19.8 % | 344.14 ± 23.84   | 2130.38 ± 148.27   | 0.9944 |
| 23F04069        | 21.2 % | 180.83 ± 6.95    | 1258.56 ± 49.05    | 0.9840 |
| 23F04070        | 22.0 % | 374.69 ± 36.81   | 2331.79 ± 230.07   | 0.9951 |
| 23F04071        | 22.9 % | 375.42 ± 41.77   | 2336.09 ± 261.03   | 0.9951 |
| 23F04073        | 23.7 % | 401.71 ± 54.92   | 2469.64 ± 338.98   | 0.9956 |

| Results                        | 40(a)/36(a) ± 2σ                                                    | 40(r)/39(k) ± 2σ             | Age ± 2σ<br>(Ma)                                       | MSWD                                    |
|--------------------------------|---------------------------------------------------------------------|------------------------------|--------------------------------------------------------|-----------------------------------------|
| Normal Isochron<br>Error Chron | 296.20 ± 3.04<br>± 1.03%                                            | 5.67900 ± 0.03629<br>± 0.64% | 16.91 ± 0.11<br>± 0.67%                                | 3.92<br>0%                              |
|                                |                                                                     |                              | Full External Error ± 0.88<br>Analytical Error ± 0.11  |                                         |
| Statistics                     | 2σ Confidence Limit<br>Error Magnification<br>Number of Data Points | 2.26<br>1.9792<br>7          | Convergence<br>Number of Iterations<br>Calculated Line | 0.000056415380<br>23<br>Weighted York-2 |

| Degassing Patterns |        | 36Ar(a)<br>[fA] | %1σ  | 36Ar(c)<br>[fA] | %1σ  | 36Ar(ca)<br>[fA] | %1σ  | 36Ar(cl)<br>[fA] | %1σ    | 37Ar(ca)<br>[fA] | %1σ  | 38Ar(a)<br>[fA] | %1σ  | 38Ar(c)<br>[fA] | %1σ  | 38Ar(k)<br>[fA] | %1σ  | 38Ar(ca)<br>[fA] | %1σ  | 38Ar(cl)<br>[fA] | %1σ    | 39Ar(k)<br>[fA] | %1σ  | 39Ar(ca)<br>[fA] | %1σ  | 40Ar(r)<br>[fA] | %1σ   | 40Ar(a)<br>[fA] | %1σ  | 40Ar(c)<br>[fA] | %1σ  | 40Ar(k)<br>[fA] | %1σ  |
|--------------------|--------|-----------------|------|-----------------|------|------------------|------|------------------|--------|------------------|------|-----------------|------|-----------------|------|-----------------|------|------------------|------|------------------|--------|-----------------|------|------------------|------|-----------------|-------|-----------------|------|-----------------|------|-----------------|------|
| 23F04031           | 0.7 %  | 0.549566        | 0.34 | 0.0000000       | 0.00 | 0.0003968        | 2.11 | 0.0000011        | 89.46  | 1.4679           | 2.10 | 0.1035931       | 0.38 | 0.0000000       | 0.00 | 0.027553        | 0.39 | 0.0002642        | 9.86 | 0.0112548        | 89.47  | 2.28144         | 0.38 | 0.0009431        | 2.30 | 6.0217          | 10.57 | 164.0783        | 0.36 | 0.0000000       | 0.00 | 0.0013848       | 9.66 |
| 23F04033           | 0.9 %  | 0.904893        | 0.27 | 0.0000000       | 0.00 | 0.0008549        | 0.96 | 0.0000000        | 0.00   | 3.1627           | 0.94 | 0.1705723       | 0.31 | 0.0000000       | 0.00 | 0.052230        | 0.24 | 0.0005693        | 9.68 | 0.0000000        | 0.00   | 4.32476         | 0.22 | 0.0020320        | 1.32 | 13.9362         | 5.87  | 270.1648        | 0.29 | 0.0000000       | 0.00 | 0.0026251       | 9.65 |
| 23F04034           | 1.2 %  | 0.746890        | 0.30 | 0.0000000       | 0.00 | 0.0007751        | 1.23 | 0.0000007        | 145.95 | 2.8677           | 1.22 | 0.1407887       | 0.34 | 0.0000000       | 0.00 | 0.044661        | 0.27 | 0.0005162        | 9.71 | 0.0071716        | 145.95 | 3.69800         | 0.26 | 0.0018425        | 1.53 | 14.3350         | 5.27  | 222.9914        | 0.32 | 0.0000000       | 0.00 | 0.0022447       | 9.65 |
| 23F04035           | 1.8 %  | 2.600635        | 0.21 | 0.0000000       | 0.00 | 0.0056362        | 0.32 | 0.0000000        | 0.00   | 20.8517          | 0.27 | 0.4902197       | 0.26 | 0.0000000       | 0.00 | 0.197005        | 0.12 | 0.0037533        | 9.63 | 0.0000000        | 0.00   | 16.31238        | 0.08 | 0.0133972        | 0.96 | 73.0700         | 2.53  | 776.4456        | 0.24 | 0.0000000       | 0.00 | 0.0099016       | 9.65 |
| 23F04037           | 2.3 %  | 2.573222        | 0.21 | 0.0000000       | 0.00 | 0.0100972        | 0.30 | 0.0000000        | 0.00   | 37.3556          | 0.24 | 0.4850524       | 0.26 | 0.0000000       | 0.00 | 0.255615        | 0.11 | 0.0067240        | 9.63 | 0.0000000        | 0.00   | 21.16540        | 0.07 | 0.0240010        | 0.95 | 104.0805        | 1.75  | 768.2612        | 0.23 | 0.0000000       | 0.00 | 0.0128474       | 9.65 |
| 23F04038           | 2.8 %  | 2.080089        | 0.22 | 0.0000000       | 0.00 | 0.0150104        | 0.29 | 0.0000000        | 0.00   | 55.5325          | 0.23 | 0.3920968       | 0.27 | 0.0000000       | 0.00 | 0.299582        | 0.11 | 0.0099959        | 9.63 | 0.0000000        | 0.00   | 24.80600        | 0.07 | 0.0356797        | 0.95 | 126.6779        | 1.20  | 621.0314        | 0.24 | 0.0000000       | 0.00 | 0.0150572       | 9.65 |
| 23F04039           | 3.4 %  | 1.777200        | 0.22 | 0.0000000       | 0.00 | 0.0223176        | 0.29 | 0.0000000        | 0.00   | 82.5660          | 0.23 | 0.3350021       | 0.27 | 0.0000000       | 0.00 | 0.380388        | 0.11 | 0.0148619        | 9.63 | 0.0000000        | 0.00   | 31.49688        | 0.06 | 0.0530486        | 0.95 | 171.0140        | 0.77  | 530.6007        | 0.24 | 0.0000000       | 0.00 | 0.0191186       | 9.65 |
| 23F04041           | 4.0 %  | 1.426003        | 0.24 | 0.0000000       | 0.00 | 0.0371786        | 0.28 | 0.0000000        | 0.00   | 137.5457         | 0.23 | 0.2688016       | 0.29 | 0.0000000       | 0.00 | 0.559696        | 0.10 | 0.0247582        | 9.63 | 0.0000000        | 0.00   | 46.34393        | 0.05 | 0.0883731        | 0.95 | 259.2945        | 0.44  | 425.7475        | 0.26 | 0.0000000       | 0.00 | 0.0281308       | 9.65 |
| 23F04042           | 4.7 %  | 1.123322        | 0.26 | 0.0000000       | 0.00 | 0.0457305        | 0.28 | 0.0000000        | 0.00   | 169.1843         | 0.23 | 0.2117463       | 0.31 | 0.0000000       | 0.00 | 0.649070        | 0.10 | 0.0304532        | 9.63 | 0.0000000        | 0.00   | 53.74427        | 0.05 | 0.1087009        | 0.95 | 302.1189        | 0.32  | 335.3792        | 0.28 | 0.0000000       | 0.00 | 0.0326228       | 9.65 |
| 23F04043           | 5.3 %  | 0.820843        | 0.28 | 0.0000000       | 0.00 | 0.0494462        | 0.28 | 0.0000000        | 0.00   | 182.9307         | 0.23 | 0.1547289       | 0.32 | 0.0000000       | 0.00 | 0.664615        | 0.10 | 0.0329275        | 9.63 | 0.0000000        | 0.00   | 55.03148        | 0.05 | 0.1175330        | 0.95 | 309.9744        | 0.25  | 245.0708        | 0.30 | 0.0000000       | 0.00 | 0.0334041       | 9.65 |
| 23F04045           | 6.0 %  | 0.603706        | 0.34 | 0.0000000       | 0.00 | 0.0556364        | 0.28 | 0.0000000        | 0.00   | 205.8319         | 0.23 | 0.1137986       | 0.37 | 0.0000000       | 0.00 | 0.709459        | 0.10 | 0.0370497        | 9.63 | 0.0000000        | 0.00   | 58.74463        | 0.05 | 0.1322470        | 0.95 | 334.9135        | 0.21  | 180.2425        | 0.35 | 0.0000000       | 0.00 | 0.0356580       | 9.65 |
| 23F04046           | 6.8 %  | 0.472430        | 0.38 | 0.0000000       | 0.00 | 0.0595091        | 0.28 | 0.0000000        | 0.00   | 220.1595         | 0.23 | 0.0890530       | 0.41 | 0.0000000       | 0.00 | 0.722971        | 0.10 | 0.0396287        | 9.63 | 0.0000000        | 0.00   | 59.86348        | 0.05 | 0.1414525        | 0.95 | 338.8794        | 0.18  | 141.0487        | 0.40 | 0.0000000       | 0.00 | 0.0363371       | 9.65 |
| 23F04047           | 7.5 %  | 0.402736        | 0.45 | 0.0000000       | 0.00 | 0.0639982        | 0.28 | 0.0000000        | 0.00   | 236.7674         | 0.23 | 0.0759158       | 0.47 | 0.0000000       | 0.00 | 0.737100        | 0.10 | 0.0426181        | 9.63 | 0.0000000        | 0.00   | 61.03337        | 0.05 | 0.1521231        | 0.95 | 345.1147        | 0.18  | 120.2409        | 0.46 | 0.0000000       | 0.00 | 0.0370473       | 9.65 |
| 23F04049           | 8.3 %  | 0.319021        | 0.51 | 0.0000000       | 0.00 | 0.0607039        | 0.28 | 0.0000000        | 0.00   | 224.5796         | 0.23 | 0.0601355       | 0.54 | 0.0000000       | 0.00 | 0.664485        | 0.10 | 0.0404243        | 9.63 | 0.0000000        | 0.00   | 55.02072        | 0.05 | 0.1442924        | 0.95 | 310.9024        | 0.18  | 95.2469         | 0.52 | 0.0000000       | 0.00 | 0.0333976       | 9.65 |
| 23F04050           | 9.1 %  | 0.244564        | 0.59 | 0.0000000       | 0.00 | 0.0604533        | 0.28 | 0.0000000        | 0.00   | 223.6526         | 0.23 | 0.0461003       | 0.62 | 0.0000000       | 0.00 | 0.622488        | 0.10 | 0.0402575        | 9.63 | 0.0000000        | 0.00   | 51.54323        | 0.05 | 0.1436968        | 0.95 | 289.6174        | 0.18  | 73.0169         | 0.60 | 0.0000000       | 0.00 | 0.0312867       | 9.65 |
| 23F04051           | 10.1 % | 0.205053        | 0.71 | 0.0000000       | 0.00 | 0.0624644        | 0.28 | 0.0000000        | 0.00   | 231.0929         | 0.23 | 0.0386526       | 0.72 | 0.0000000       | 0.00 | 0.602175        | 0.10 | 0.0415967        | 9.63 | 0.0000000        | 0.00   | 49.86131        | 0.05 | 0.1484772        | 0.95 | 279.7863        | 0.18  | 61.2207         | 0.71 | 0.0000000       | 0.00 | 0.0302658       | 9.65 |
| 23F04053           | 10.5 % | 0.121783        | 1.07 | 0.0000000       | 0.00 | 0.0381524        | 0.28 | 0.0000000        | 0.00   | 141.1483         | 0.23 | 0.0229562       | 1.08 | 0.0000000       | 0.00 | 0.357030        | 0.11 | 0.0254067        | 9.63 | 0.0000000        | 0.00   | 29.56278        | 0.06 | 0.0906878        | 0.95 | 165.7817        | 0.28  | 36.3596         | 1.07 | 0.0000000       | 0.00 | 0.0179446       | 9.65 |
| 23F04054           | 11.0 % | 0.106091        | 1.20 | 0.0000000       | 0.00 | 0.0356009        | 0.28 | 0.0000000        | 0.00   | 131.7088         | 0.23 | 0.0199982       | 1.21 | 0.0000000       | 0.00 | 0.322613        | 0.11 | 0.0237076        | 9.63 | 0.0000000        | 0.00   | 26.71300        | 0.06 | 0.0846229        | 0.95 | 148.7612        | 0.31  | 31.6747         | 1.20 | 0.0000000       | 0.00 | 0.0162148       | 9.65 |
| 23F04055           | 11.5 % | 0.079333        | 1.54 | 0.0000000       | 0.00 | 0.0313223        | 0.28 | 0.0000000        | 0.00   | 115.8798         | 0.23 | 0.0149542       | 1.54 | 0.0000000       | 0.00 | 0.271863        | 0.11 | 0.0208584        | 9.63 | 0.0000000        | 0.00   | 22.51083        | 0.07 | 0.0744528        | 0.95 | 124.8375        | 0.36  | 23.6856         | 1.54 | 0.0000000       | 0.00 | 0.0136641       | 9.65 |
| 23F04057           | 12.0 % | 0.061401        | 1.94 | 0.0000000       | 0.00 | 0.0282283        | 0.28 | 0.0000000        | 0.00   | 104.4331         | 0.23 | 0.0115741       | 1.95 | 0.0000000       | 0.00 | 0.235247        | 0.12 | 0.0187980        | 9.63 | 0.0000000        | 0.00   | 19.47889        | 0.07 | 0.0670983        | 0.95 | 108.0261        | 0.41  | 18.3319         | 1.94 | 0.0000000       | 0.00 | 0.0118237       | 9.65 |
| 23F04058           | 12.5 % | 0.048790        | 2.40 | 0.0000000       | 0.00 | 0.0224858        | 0.29 | 0.0000000        | 0.00   | 83.1883          | 0.23 | 0.0091970       | 2.41 | 0.0000000       | 0.00 | 0.191010        | 0.12 | 0.0149739        | 9.63 | 0.0000000        | 0.00   | 15.81605        | 0.08 | 0.0534485        | 0.95 | 87.7699         | 0.49  | 14.5668         | 2.40 | 0.0000000       | 0.00 | 0.0096003       | 9.65 |
| 23F04059           | 13.0 % | 0.055331        | 2.17 | 0.0000000       | 0.00 | 0.0202426        | 0.29 | 0.0000000        | 0.00   | 74.8892          | 0.23 | 0.0104299       | 2.18 | 0.0000000       | 0.00 | 0.170492        | 0.13 | 0.0134801        | 9.63 | 0.0000000        | 0.00   | 14.11708        | 0.09 | 0.0481163        | 0.95 | 77.8570         | 0.57  | 16.5197         | 2.17 | 0.0000000       | 0.00 | 0.0085691       | 9.65 |
| 23F04061           | 14.3 % | 0.056000        | 2.17 | 0.0000000       | 0.00 | 0.0299257        | 0.29 | 0.0000000        | 0.00   | 110.7129         | 0.23 | 0.0105560       | 2.18 | 0.0000000       | 0.00 | 0.216738        | 0.12 | 0.0199283        | 9.63 | 0.0000000        | 0.00   | 17.94638        | 0.07 | 0.0711331        | 0.95 | 97.1828         | 0.46  | 16.7194         | 2.17 | 0.0000000       | 0.00 | 0.0108935       | 9.65 |
| 23F04062           | 15.5 % | 0.053764        | 2.23 | 0.0000000       | 0.00 | 0.0294834        | 0.28 | 0.0000000        | 0.00   | 109.0767         | 0.23 | 0.0101345       | 2.24 | 0.0000000       | 0.00 | 0.202014        | 0.12 | 0.0196338        | 9.63 | 0.0000000        | 0.00   | 16.72714        | 0.08 | 0.0700818        | 0.95 | 89.3898         | 0.49  | 16.0517         | 2.23 | 0.0000000       | 0.00 | 0.0101534       | 9.65 |
| 23F04063           | 16.5 % | 0.054212        | 2.21 | 0.0000000       | 0.00 | 0.0272198        | 0.29 | 0.0000000        | 0.00   | 100.7020         | 0.23 | 0.0102190       | 2.22 | 0.0000000       | 0.00 | 0.175511        | 0.12 | 0.0181264        | 9.63 | 0.0000000        | 0.00   | 14.53263        | 0.09 | 0.0647011        | 0.95 | 77.0502         | 0.57  | 16.1857         | 2.22 | 0.0000000       | 0.00 | 0.0088213       | 9.65 |
| 23F04065           | 17.6 % | 0.040540        | 2.94 | 0.0000000       | 0.00 | 0.0280499        | 0.28 | 0.0000000        | 0.00   | 103.7731         | 0.23 | 0.0076417       | 2.94 | 0.0000000       | 0.00 | 0.170767        | 0.12 | 0.0186792        | 9.63 | 0.0000000        | 0.00   | 14.13983        | 0.08 | 0.0666742        | 0.95 | 75.5042         | 0.58  | 12.1035         | 2.94 | 0.0000000       | 0.00 | 0.0085829       | 9.65 |
| 23F04066           | 18.6 % | 0.038362        | 2.98 | 0.0000000       | 0.00 | 0.0252362        | 0.29 | 0.0000001        | #####  | 93.3637          | 0.23 | 0.0072312       | 2.98 | 0.0000000       | 0.00 | 0.147761        | 0.13 | 0.0168055        | 9.63 | 0.0007180        | #####  | 12.23494        | 0.09 | 0.0599862        | 0.95 | 65.0574         | 0.66  | 11.4534         | 2.98 | 0.0000000       | 0.00 | 0.0074266       | 9.65 |
| 23F04067           | 19.8 % | 0.034037        | 3.46 | 0.0000000       | 0.00 | 0.0240325        | 0.29 | 0.0000000        | 0.00   | 88.9106          | 0.23 | 0.0064159       | 3.47 | 0.0000000       | 0.00 | 0.141464        | 0.14 | 0.0160039        | 9.63 | 0.0000000        | 0.00   | 11.71348        | 0.10 | 0.0571251        | 0.95 | 62.3492         | 0.70  | 10.1620         | 3.46 | 0.0000000       | 0.00 | 0.0071101       | 9.65 |
| 23F04069           | 21.2 % | 0.061001        | 1.92 | 0.0000000       | 0.00 | 0.0225932        | 0.29 | 0.0000000        | 0.00   | 83.5855          | 0.23 | 0.0114988       | 1.93 | 0.0000000       | 0.00 | 0.133220        | 0.13 | 0.0150454        | 9.63 | 0.0000000        | 0.00   | 11.03088        | 0.10 | 0.0537037        | 0.95 | 58.5612         | 0.74  | 18.2126         | 1.92 | 0.0000000       | 0.00 | 0.0066957       | 9.65 |
| 23F04070           | 22.0 % | 0.023055        | 4.91 | 0.0000000       | 0.00 | 0.0165932        | 0.29 | 0.0000000        | 0.00   | 61.3881          | 0.23 | 0.0043459       | 4.91 | 0.0000000       | 0.00 | 0.104326        | 0.15 | 0.0110499        | 9.63 | 0.0000000        | 0.00   | 8.63843         | 0.12 | 0.0394419        | 0.95 | 46.8763         | 0.90  | 6.8833          | 4.91 | 0.0000000       | 0.00 | 0.0052435       | 9.65 |
| 23F04071           | 22.9 % | 0.020402        | 5.56 | 0.0000000       | 0.00 | 0.0151980        | 0.29 | 0.0000000        | 0.00   | 56.2266          | 0.23 | 0.0038457       | 5.56 | 0.0000000       | 0.00 | 0.092499        | 0.16 | 0.0101208        | 9.63 | 0.0000000        | 0.00   | 7.65912         | 0.13 | 0.0361256        | 0.95 | 41.5691         | 1.02  |                 |      |                 |      |                 |      |

| Additional Parameters |        | 40Ar/39Ar  | 1σ       | 37Ar/39Ar | 1σ       | 36Ar/39Ar | 1σ       | Time (days) | 37Ar (decay) | 39Ar (decay) | 40Ar (moles) |
|-----------------------|--------|------------|----------|-----------|----------|-----------|----------|-------------|--------------|--------------|--------------|
| 23F04031              | 0.7 %  | 74.527993  | 0.302954 | 0.643147  | 0.013740 | 0.240960  | 0.001223 | 62.321      | 3.432981     | 1.00044071   | 6.022E-12    |
| 23F04033              | 0.9 %  | 65.661423  | 0.157746 | 0.730947  | 0.007095 | 0.209334  | 0.000729 | 62.340      | 3.434253     | 1.00044085   | 1.006E-11    |
| 23F04034              | 1.2 %  | 64.145527  | 0.179845 | 0.775092  | 0.009660 | 0.202080  | 0.000802 | 62.349      | 3.434865     | 1.00044091   | 8.401E-12    |
| 23F04035              | 1.8 %  | 52.035835  | 0.045041 | 1.277225  | 0.003625 | 0.159641  | 0.000360 | 62.358      | 3.435478     | 1.00044097   | 3.007E-11    |
| 23F04037              | 2.3 %  | 41.169380  | 0.030659 | 1.762939  | 0.004427 | 0.121916  | 0.000269 | 62.376      | 3.436703     | 1.00044110   | 3.088E-11    |
| 23F04038              | 2.8 %  | 30.099593  | 0.022325 | 2.235459  | 0.005429 | 0.084338  | 0.000190 | 62.385      | 3.437316     | 1.00044117   | 2.647E-11    |
| 23F04039              | 3.4 %  | 22.238843  | 0.015301 | 2.616995  | 0.006199 | 0.057037  | 0.000128 | 62.394      | 3.437929     | 1.00044123   | 2.484E-11    |
| 23F04041              | 4.0 %  | ✓14.754170 | 0.009696 | 2.962284  | 0.006909 | 0.031512  | 0.000075 | 62.412      | 3.439203     | 1.00044136   | 2.425E-11    |
| 23F04042              | 4.7 %  | ✓11.838357 | 0.007868 | 3.141597  | 0.007308 | 0.021708  | 0.000056 | 62.422      | 3.439816     | 1.00044143   | 2.257E-11    |
| 23F04043              | 5.3 %  | ✓10.065069 | 0.007043 | 3.317026  | 0.007713 | 0.015781  | 0.000043 | 62.431      | 3.440429     | 1.00044149   | 1.965E-11    |
| 23F04045              | 6.0 %  | ✓8.750322  | 0.006295 | 3.495972  | 0.008112 | 0.011199  | 0.000035 | 62.449      | 3.441657     | 1.00044162   | 1.824E-11    |
| 23F04046              | 6.8 %  | ✓7.998749  | 0.005936 | 3.669024  | 0.008508 | 0.008865  | 0.000030 | 62.458      | 3.442270     | 1.00044168   | 1.699E-11    |
| 23F04047              | 7.5 %  | ✓7.606259  | 0.005725 | 3.869666  | 0.008967 | 0.007628  | 0.000030 | 62.467      | 3.442932     | 1.00044175   | 1.647E-11    |
| 23F04049              | 8.3 %  | ✓7.363051  | 0.006034 | 4.071052  | 0.009443 | 0.006883  | 0.000030 | 62.485      | 3.444160     | 1.00044188   | 1.438E-11    |
| 23F04050              | 9.1 %  | 7.016585   | 0.006215 | 4.327063  | 0.010053 | 0.005901  | 0.000028 | 62.494      | 3.444774     | 1.00044194   | 1.284E-11    |
| 23F04051              | 10.1 % | 6.819412   | 0.006258 | 4.620953  | 0.010726 | 0.005349  | 0.000029 | 62.503      | 3.445388     | 1.00044200   | 1.207E-11    |
| 23F04053              | 10.5 % | 6.817393   | 0.009514 | 4.759926  | 0.011158 | 0.005393  | 0.000044 | 62.522      | 3.446617     | 1.00044213   | 7.156E-12    |
| 23F04054              | 11.0 % | 6.733887   | 0.010399 | 4.914945  | 0.011566 | 0.005287  | 0.000047 | 62.531      | 3.447232     | 1.00044220   | 6.388E-12    |
| 23F04055              | 11.5 % | 6.576704   | 0.012169 | 5.130766  | 0.012191 | 0.004899  | 0.000054 | 62.540      | 3.447894     | 1.00044226   | 5.258E-12    |
| 23F04057              | 12.0 % | 6.465258   | 0.013911 | 5.342943  | 0.012803 | 0.004586  | 0.000061 | 62.558      | 3.449124     | 1.00044239   | 4.473E-12    |
| 23F04058              | 12.5 % | 6.449248   | 0.016870 | 5.242022  | 0.012694 | 0.004491  | 0.000074 | 62.567      | 3.449739     | 1.00044246   | 3.623E-12    |
| 23F04059              | 13.0 % | 6.663182   | 0.018965 | 5.286846  | 0.013055 | 0.005335  | 0.000085 | 62.576      | 3.450354     | 1.00044252   | 3.341E-12    |
| 23F04061              | 14.3 % | 6.322351   | 0.014972 | 6.144739  | 0.014784 | 0.004769  | 0.000067 | 62.594      | 3.451585     | 1.00044265   | 4.033E-12    |
| 23F04062              | 15.5 % | 6.277922   | 0.015947 | 6.493735  | 0.015609 | 0.004956  | 0.000071 | 62.604      | 3.452248     | 1.00044271   | 3.733E-12    |
| 23F04063              | 16.5 % | 6.387788   | 0.018354 | 6.898661  | 0.016847 | 0.005579  | 0.000082 | 62.613      | 3.452863     | 1.00044278   | 3.301E-12    |
| 23F04065              | 17.6 % | 6.167335   | 0.018720 | 7.304617  | 0.017758 | 0.004828  | 0.000084 | 62.631      | 3.454095     | 1.00044291   | 3.102E-12    |
| 23F04066              | 18.6 % | 6.223560   | 0.021557 | 7.593681  | 0.018725 | 0.005173  | 0.000093 | 62.640      | 3.454711     | 1.00044297   | 2.709E-12    |
| 23F04067              | 19.8 % | 6.160969   | 0.022597 | 7.553613  | 0.018953 | 0.004933  | 0.000100 | 62.649      | 3.455327     | 1.00044303   | 2.567E-12    |
| 23F04069              | 21.2 % | 6.926779   | 0.024056 | 7.540702  | 0.018848 | 0.007542  | 0.000106 | 62.668      | 3.456607     | 1.00044317   | 2.718E-12    |
| 23F04070              | 22.0 % | 6.195627   | 0.030350 | 7.074101  | 0.018477 | 0.004569  | 0.000130 | 62.677      | 3.457223     | 1.00044323   | 1.903E-12    |
| 23F04071              | 22.9 % | 6.194064   | 0.034207 | 7.306665  | 0.019514 | 0.004626  | 0.000147 | 62.686      | 3.457840     | 1.00044329   | 1.687E-12    |
| 23F04073              | 23.7 % | 6.119123   | 0.039250 | 7.434212  | 0.020837 | 0.004487  | 0.000169 | 62.704      | 3.459073     | 1.00044342   | 1.452E-12    |

| Procedure Blanks |        | 36Ar ± 1σ (SE) [fA]   | 37Ar ± 1σ (SE) [fA]   | 38Ar ± 1σ (SE) [fA]    | 39Ar ± 1σ (SE) [fA]   | 40Ar ± 1σ (SE) [fA]   |
|------------------|--------|-----------------------|-----------------------|------------------------|-----------------------|-----------------------|
| 23F04031         | 0.7 %  | 0.0271830 ± 0.0010180 | 0.0175022 ± 0.0063838 | 0.01011149 ± 0.0079614 | 0.0081504 ± 0.0062912 | 7.7317545 ± 0.2550829 |
| 23F04033         | 0.9 %  | 0.0269688 ± 0.0010180 | 0.0209093 ± 0.0063838 | 0.0001737 ± 0.0079614  | 0.0166816 ± 0.0062912 | 7.7785246 ± 0.2550829 |
| 23F04034         | 1.2 %  | 0.0269150 ± 0.0010180 | 0.0222722 ± 0.0063838 | 0.0038236 ± 0.0079614  | 0.0196381 ± 0.0062912 | 7.7960182 ± 0.2550829 |
| 23F04035         | 1.8 %  | 0.0268873 ± 0.0010180 | 0.0234777 ± 0.0063838 | 0.0067308 ± 0.0079614  | 0.0219415 ± 0.0062912 | 7.8105158 ± 0.2550829 |
| 23F04037         | 2.3 %  | 0.0268943 ± 0.0010180 | 0.0254777 ± 0.0063838 | 0.0106078 ± 0.0079614  | 0.0248513 ± 0.0062912 | 7.8312852 ± 0.2550829 |
| 23F04038         | 2.8 %  | 0.0269216 ± 0.0010180 | 0.0263007 ± 0.0063838 | 0.0117151 ± 0.0079614  | 0.0255816 ± 0.0062912 | 7.8379240 ± 0.2550829 |
| 23F04039         | 3.4 %  | 0.0269602 ± 0.0010180 | 0.0270227 ± 0.0063838 | 0.0123550 ± 0.0079614  | 0.0259063 ± 0.0062912 | 7.8423009 ± 0.2550829 |
| 23F04041         | 4.0 %  | 0.0270630 ± 0.0010180 | 0.0282492 ± 0.0063838 | 0.0124533 ± 0.0079614  | 0.0255189 ± 0.0062912 | 7.8448931 ± 0.2550829 |
| 23F04042         | 4.7 %  | 0.0271176 ± 0.0010180 | 0.0287293 ± 0.0063838 | 0.0120264 ± 0.0079614  | 0.0249257 ± 0.0062912 | 7.8433486 ± 0.2550829 |
| 23F04043         | 5.3 %  | 0.0271720 ± 0.0010180 | 0.0291497 ± 0.0063838 | 0.0113630 ± 0.0079614  | 0.0241311 ± 0.0062912 | 7.8401979 ± 0.2550829 |
| 23F04045         | 6.0 %  | 0.0272718 ± 0.0010180 | 0.0298403 ± 0.0063838 | 0.0095196 ± 0.0079614  | 0.0221057 ± 0.0062912 | 7.8296584 ± 0.2550829 |
| 23F04046         | 6.8 %  | 0.0273135 ± 0.0010180 | 0.0301225 ± 0.0063838 | 0.0084286 ± 0.0079614  | 0.0209512 ± 0.0062912 | 7.8225459 ± 0.2550829 |
| 23F04047         | 7.5 %  | 0.0273498 ± 0.0010180 | 0.0303867 ± 0.0063838 | 0.0071892 ± 0.0079614  | 0.0196547 ± 0.0062912 | 7.8137114 ± 0.2550829 |
| 23F04049         | 8.3 %  | 0.0273883 ± 0.0010180 | 0.0307816 ± 0.0063838 | 0.0048606 ± 0.0079614  | 0.0172263 ± 0.0062912 | 7.7945846 ± 0.2550829 |
| 23F04050         | 9.1 %  | 0.0273915 ± 0.0010180 | 0.0309364 ± 0.0063838 | 0.0037489 ± 0.0079614  | 0.0160558 ± 0.0062912 | 7.7839303 ± 0.2550829 |
| 23F04051         | 10.1 % | 0.0273832 ± 0.0010180 | 0.0310636 ± 0.0063838 | 0.0027102 ± 0.0079614  | 0.0149445 ± 0.0062912 | 7.7726930 ± 0.2550829 |
| 23F04053         | 10.5 % | 0.0273304 ± 0.0010180 | 0.0312321 ± 0.0063838 | 0.0009472 ± 0.0079614  | 0.0129725 ± 0.0062912 | 7.7488689 ± 0.2550829 |
| 23F04054         | 11.0 % | 0.0272859 ± 0.0010180 | 0.0312692 ± 0.0063838 | 0.0002631 ± 0.0079614  | 0.0121410 ± 0.0062912 | 7.7364677 ± 0.2550829 |
| 23F04055         | 11.5 % | 0.0272248 ± 0.0010180 | 0.0312691 ± 0.0063838 | 0.0003017 ± 0.0079614  | 0.0113772 ± 0.0062912 | 7.7228778 ± 0.2550829 |
| 23F04057         | 12.0 % | 0.0270777 ± 0.0010180 | 0.0311379 ± 0.0063838 | 0.0008288 ± 0.0079614  | 0.0103477 ± 0.0062912 | 7.6973167 ± 0.2550829 |
| 23F04058         | 12.5 % | 0.0269895 ± 0.0010180 | 0.0309960 ± 0.0063838 | 0.0008219 ± 0.0079614  | 0.0100281 ± 0.0062912 | 7.6845214 ± 0.2550829 |
| 23F04059         | 13.0 % | 0.0268930 ± 0.0010180 | 0.0307934 ± 0.0063838 | 0.0006293 ± 0.0079614  | 0.0098371 ± 0.0062912 | 7.6718001 ± 0.2550829 |
| 23F04061         | 14.3 % | 0.0266815 ± 0.0010180 | 0.0301701 ± 0.0063838 | 0.0003110 ± 0.0079614  | 0.0098193 ± 0.0062912 | 7.6467972 ± 0.2550829 |
| 23F04062         | 15.5 % | 0.0265613 ± 0.0010180 | 0.0296912 ± 0.0063838 | 0.0011142 ± 0.0079614  | 0.0099902 ± 0.0062912 | 7.6336835 ± 0.2550829 |
| 23F04063         | 16.5 % | 0.0264487 ± 0.0010180 | 0.0291405 ± 0.0063838 | 0.0020347 ± 0.0079614  | 0.0102440 ± 0.0062912 | 7.6217821 ± 0.2550829 |
| 23F04065         | 17.6 % | 0.0262304 ± 0.0010180 | 0.0276800 ± 0.0063838 | 0.0043282 ± 0.0079614  | 0.0109552 ± 0.0062912 | 7.5989050 ± 0.2550829 |
| 23F04066         | 18.6 % | 0.0261302 ± 0.0010180 | 0.0267417 ± 0.0063838 | 0.0056681 ± 0.0079614  | 0.0113706 ± 0.0062912 | 7.5879782 ± 0.2550829 |
| 23F04067         | 19.8 % | 0.0260399 ± 0.0010180 | 0.0256439 ± 0.0063838 | 0.0071098 ± 0.0079614  | 0.0117929 ± 0.0062912 | 7.5774160 ± 0.2550829 |
| 23F04069         | 21.2 % | 0.0258986 ± 0.0010180 | 0.0227805 ± 0.0063838 | 0.0103209 ± 0.0079614  | 0.0125654 ± 0.0062912 | 7.5566828 ± 0.2550829 |
| 23F04070         | 22.0 % | 0.0258604 ± 0.0010180 | 0.0210827 ± 0.0063838 | 0.0119114 ± 0.0079614  | 0.0128182 ± 0.0062912 | 7.5472836 ± 0.2550829 |
| 23F04071         | 22.9 % | 0.0258469 ± 0.0010180 | 0.0191509 ± 0.0063838 | 0.0134865 ± 0.0079614  | 0.0129438 ± 0.0062912 | 7.5382564 ± 0.2550829 |
| 23F04073         | 23.7 % | 0.0259112 ± 0.0010180 | 0.0145005 ± 0.0063838 | 0.0164421 ± 0.0079614  | 0.0126495 ± 0.0062912 | 7.5212630 ± 0.2550829 |

| Intercept<br>Values |        | 36Ar ± 1σ (SE)<br>[fA] | r2     | Regression<br>(type,n) | 37Ar ± 1σ (SE)<br>[fA] | r2     | Regression<br>(type,n) | 38Ar ± 1σ (SE)<br>[fA] | r2     | Regression<br>(type,n) | 39Ar ± 1σ (SE)<br>[fA] | r2     | Regression<br>(type,n) | 40Ar ± 1σ (SE)<br>[fA] | r2     | Regression<br>(type,n) |
|---------------------|--------|------------------------|--------|------------------------|------------------------|--------|------------------------|------------------------|--------|------------------------|------------------------|--------|------------------------|------------------------|--------|------------------------|
| 23F04031            | 0.7 %  | 0.5556344 ± 0.0010991  | 0.9719 | EXP 150 of 150         | 0.440260 ± 0.006112    | 0.2704 | EXP 150 of 150         | 0.1314740 ± 0.0060212  | 0.0467 | EXP 150 of 150         | 2.2809382 ± 0.0057427  | 0.9189 | EXP 148 of 150         | 177.833147 ± 0.021707  | 0.9998 | EXP 150 of 150         |
| 23F04033            | 0.9 %  | 0.8972876 ± 0.0013280  | 0.9856 | EXP 150 of 150         | 0.931419 ± 0.005391    | 0.7183 | EXP 148 of 150         | 0.2177221 ± 0.0070658  | 0.0983 | EXP 150 of 150         | 4.3252888 ± 0.0069605  | 0.9742 | EXP 150 of 150         | 291.882168 ± 0.029913  | 0.9999 | EXP 150 of 150         |
| 23F04034            | 1.2 %  | 0.7453351 ± 0.0013542  | 0.9776 | EXP 150 of 150         | 0.847724 ± 0.007555    | 0.5505 | EXP 150 of 150         | 0.1955039 ± 0.0066479  | 0.1471 | EXP 150 of 150         | 3.7039296 ± 0.0069535  | 0.9623 | EXP 150 of 150         | 245.124572 ± 0.029214  | 0.9998 | EXP 150 of 150         |
| 23F04035            | 1.8 %  | 2.5312129 ± 0.0022366  | 0.9953 | EXP 150 of 150         | 6.024406 ± 0.006620    | 0.9900 | EXP 150 of 150         | 0.6671021 ± 0.0067226  | 0.5804 | EXP 150 of 150         | 16.2790838 ± 0.0086963 | 0.9978 | EXP 150 of 150         | 857.335986 ± 0.087421  | 0.9999 | EXP 150 of 150         |
| 23F04037            | 2.3 %  | 2.5091659 ± 0.0021481  | 0.9955 | EXP 150 of 150         | 10.772256 ± 0.007090   | 0.9965 | EXP 149 of 150         | 0.7178438 ± 0.0061057  | 0.6637 | EXP 150 of 150         | 21.1251682 ± 0.0083513 | 0.9989 | EXP 150 of 150         | 880.185828 ± 0.091303  | 0.9999 | EXP 149 of 150         |
| 23F04038            | 2.8 %  | 2.0400704 ± 0.0019359  | 0.9946 | EXP 150 of 150         | 15.999522 ± 0.008060   | 0.9979 | EXP 150 of 150         | 0.6761403 ± 0.0067445  | 0.5557 | EXP 150 of 150         | 24.7628165 ± 0.0094144 | 0.9990 | EXP 150 of 150         | 755.562284 ± 0.080702  | 0.9999 | EXP 149 of 150         |
| 23F04039            | 3.4 %  | 1.7560885 ± 0.0016433  | 0.9945 | EXP 149 of 150         | 23.771833 ± 0.009065   | 0.9988 | EXP 150 of 150         | 0.7014721 ± 0.0062078  | 0.6196 | EXP 150 of 150         | 31.4431837 ± 0.0087274 | 0.9995 | EXP 150 of 150         | 709.476122 ± 0.074721  | 0.9999 | EXP 150 of 150         |
| 23F04041            | 4.0 %  | 1.4330117 ± 0.0016471  | 0.9913 | EXP 149 of 150         | 39.569788 ± 0.010122   | 0.9995 | EXP 149 of 150         | 0.8074599 ± 0.0067268  | 0.6730 | EXP 150 of 150         | 46.2625990 ± 0.0106897 | 0.9996 | EXP 150 of 150         | 692.915020 ± 0.063902  | 0.9999 | EXP 147 of 150         |
| 23F04042            | 4.7 %  | 1.1504425 ± 0.0015920  | 0.9873 | EXP 149 of 150         | 48.657057 ± 0.011775   | 0.9995 | EXP 150 of 150         | 0.8332199 ± 0.0063270  | 0.7126 | EXP 149 of 150         | 53.6514660 ± 0.0112331 | 0.9997 | EXP 148 of 150         | 645.374005 ± 0.067999  | 0.9999 | EXP 150 of 150         |
| 23F04043            | 5.3 %  | 0.8634192 ± 0.0012022  | 0.9867 | EXP 150 of 150         | 52.599203 ± 0.012402   | 0.9996 | EXP 150 of 150         | 0.8020344 ± 0.0072654  | 0.6255 | EXP 150 of 150         | 54.9412613 ± 0.0116195 | 0.9997 | EXP 150 of 150         | 562.918794 ± 0.049494  | 0.9999 | EXP 149 of 150         |
| 23F04045            | 6.0 %  | 0.6608238 ± 0.0011885  | 0.9738 | EXP 150 of 150         | 59.160078 ± 0.011897   | 0.9997 | EXP 150 of 150         | 0.8197438 ± 0.0066135  | 0.7097 | EXP 150 of 150         | 58.6514235 ± 0.0118128 | 0.9997 | EXP 147 of 150         | 523.021303 ± 0.045188  | 0.9999 | EXP 150 of 150         |
| 23F04046            | 6.8 %  | 0.5384454 ± 0.0010188  | 0.9697 | EXP 148 of 150         | 63.265038 ± 0.012202   | 0.9997 | EXP 150 of 150         | 0.8077355 ± 0.0068089  | 0.6747 | EXP 150 of 150         | 59.7735711 ± 0.0114788 | 0.9998 | EXP 150 of 150         | 487.786925 ± 0.042227  | 0.9999 | EXP 150 of 150         |
| 23F04047            | 7.5 %  | 0.4758277 ± 0.0011081  | 0.9529 | EXP 150 of 150         | 68.022411 ± 0.012331   | 0.9997 | EXP 150 of 150         | 0.8235140 ± 0.0070457  | 0.6843 | EXP 149 of 150         | 60.9478674 ± 0.0114153 | 0.9998 | EXP 150 of 150         | 473.206396 ± 0.041070  | 0.9999 | EXP 150 of 150         |
| 23F04049            | 8.3 %  | 0.3922601 ± 0.0009661  | 0.9460 | EXP 150 of 150         | 64.499873 ± 0.011019   | 0.9998 | EXP 148 of 150         | 0.7156529 ± 0.0068426  | 0.5830 | EXP 149 of 150         | 54.9502669 ± 0.0114888 | 0.9997 | EXP 150 of 150         | 413.977343 ± 0.035586  | 0.9999 | EXP 148 of 150         |
| 23F04050            | 9.1 %  | 0.3204776 ± 0.0007691  | 0.9416 | EXP 149 of 150         | 64.222454 ± 0.011619   | 0.9997 | EXP 150 of 150         | 0.6666953 ± 0.0064473  | 0.6127 | EXP 150 of 150         | 51.4856324 ± 0.0120271 | 0.9996 | EXP 150 of 150         | 370.449601 ± 0.031836  | 0.9999 | EXP 149 of 150         |
| 23F04051            | 10.1 % | 0.2844369 ± 0.0007977  | 0.9095 | EXP 150 of 150         | 66.346229 ± 0.011633   | 0.9998 | EXP 149 of 150         | 0.6450007 ± 0.0063691  | 0.5484 | EXP 150 of 150         | 49.8144309 ± 0.0106702 | 0.9997 | EXP 150 of 150         | 348.809995 ± 0.031200  | 0.9999 | EXP 150 of 150         |
| 23F04053            | 10.5 % | 0.1810102 ± 0.0006528  | 0.8197 | EXP 149 of 150         | 40.521166 ± 0.009482   | 0.9996 | EXP 149 of 150         | 0.3758232 ± 0.0071793  | 0.1879 | EXP 150 of 150         | 29.5417358 ± 0.0084705 | 0.9995 | EXP 147 of 150         | 209.908178 ± 0.024842  | 0.9998 | EXP 150 of 150         |
| 23F04054            | 11.0 % | 0.1634359 ± 0.0006117  | 0.7830 | EXP 150 of 150         | 37.806644 ± 0.009497   | 0.9995 | EXP 147 of 150         | 0.3539154 ± 0.0067230  | 0.2880 | EXP 150 of 150         | 26.6970668 ± 0.0084900 | 0.9993 | EXP 150 of 150         | 188.188586 ± 0.023714  | 0.9998 | EXP 149 of 150         |
| 23F04055            | 11.5 % | 0.1335515 ± 0.0005364  | 0.7454 | EXP 150 of 150         | 33.260355 ± 0.009459   | 0.9993 | EXP 150 of 150         | 0.2902617 ± 0.0073632  | 0.1397 | EXP 150 of 150         | 22.5016829 ± 0.0089965 | 0.9989 | EXP 148 of 150         | 156.259613 ± 0.022884  | 0.9997 | EXP 150 of 150         |
| 23F04057            | 12.0 % | 0.1132012 ± 0.0004936  | 0.5996 | EXP 150 of 150         | 29.967146 ± 0.008949   | 0.9993 | EXP 150 of 150         | 0.2403024 ± 0.0063957  | 0.0575 | EXP 149 of 150         | 19.4741360 ± 0.0089381 | 0.9986 | EXP 150 of 150         | 134.067178 ± 0.020811  | 0.9996 | EXP 146 of 150         |
| 23F04058            | 12.5 % | 0.0954775 ± 0.0004584  | 0.4518 | EXP 150 of 150         | 23.872869 ± 0.008521   | 0.9990 | EXP 150 of 150         | 0.2116869 ± 0.0070811  | 0.1094 | EXP 150 of 150         | 15.8127895 ± 0.0073074 | 0.9985 | EXP 150 of 150         | 110.030868 ± 0.021833  | 0.9992 | EXP 150 of 150         |
| 23F04059            | 13.0 % | 0.0995107 ± 0.0005255  | 0.4662 | EXP 150 of 150         | 21.490315 ± 0.008970   | 0.9985 | EXP 150 of 150         | 0.1863283 ± 0.0068263  | 0.1062 | EXP 150 of 150         | 14.1154579 ± 0.0082494 | 0.9976 | EXP 150 of 150         | 102.057065 ± 0.019714  | 0.9992 | EXP 150 of 150         |
| 23F04061            | 14.3 % | 0.1092463 ± 0.0005452  | 0.5472 | EXP 149 of 150         | 31.743679 ± 0.010493   | 0.9991 | EXP 148 of 150         | 0.2368715 ± 0.0075416  | 0.1087 | EXP 150 of 150         | 17.9515593 ± 0.0084222 | 0.9985 | EXP 150 of 150         | 121.559874 ± 0.022134  | 0.9994 | EXP 150 of 150         |
| 23F04062            | 15.5 % | 0.1065522 ± 0.0005111  | 0.5723 | EXP 150 of 150         | 31.268513 ± 0.009479   | 0.9992 | EXP 150 of 150         | 0.2259583 ± 0.0064649  | 0.1444 | EXP 150 of 150         | 16.7365693 ± 0.0075971 | 0.9986 | EXP 150 of 150         | 113.085358 ± 0.021291  | 0.9993 | EXP 150 of 150         |
| 23F04063            | 16.5 % | 0.1046956 ± 0.0005153  | 0.5638 | EXP 150 of 150         | 28.864361 ± 0.009269   | 0.9992 | EXP 150 of 150         | 0.2020228 ± 0.0072278  | 0.1325 | EXP 149 of 150         | 14.5461792 ± 0.0083113 | 0.9978 | EXP 150 of 150         | 100.866436 ± 0.019872  | 0.9992 | EXP 146 of 150         |
| 23F04065            | 17.6 % | 0.0921371 ± 0.0005036  | 0.3548 | EXP 147 of 150         | 29.731680 ± 0.008748   | 0.9993 | EXP 150 of 150         | 0.1788735 ± 0.0058768  | 0.0345 | EXP 150 of 150         | 14.1577085 ± 0.0074961 | 0.9980 | EXP 150 of 150         | 95.215184 ± 0.018823   | 0.9991 | EXP 150 of 150         |
| 23F04066            | 18.6 % | 0.0872408 ± 0.0003906  | 0.4980 | EXP 150 of 150         | 26.746402 ± 0.009018   | 0.9991 | EXP 150 of 150         | 0.1768829 ± 0.0065331  | 0.1032 | EXP 148 of 150         | 12.2545812 ± 0.0071979 | 0.9976 | EXP 149 of 150         | 84.106173 ± 0.019036   | 0.9987 | EXP 149 of 150         |
| 23F04067            | 19.8 % | 0.0818377 ± 0.0004799  | 0.3189 | EXP 150 of 150         | 25.466337 ± 0.009279   | 0.9989 | EXP 150 of 150         | 0.1613346 ± 0.0071056  | 0.0651 | EXP 150 of 150         | 11.7328914 ± 0.0083795 | 0.9964 | EXP 149 of 150         | 80.095767 ± 0.018837   | 0.9985 | EXP 148 of 150         |
| 23F04069            | 21.2 % | 0.1062234 ± 0.0004515  | 0.6515 | EXP 150 of 150         | 23.930912 ± 0.008219   | 0.9990 | EXP 149 of 150         | 0.1472145 ± 0.0059068  | 0.0496 | EXP 150 of 150         | 11.0505241 ± 0.0072442 | 0.9970 | EXP 149 of 150         | 84.337146 ± 0.018074   | 0.9989 | EXP 150 of 150         |
| 23F04070            | 22.0 % | 0.0639578 ± 0.0003738  | 0.0495 | EXP 150 of 150         | 17.576915 ± 0.008055   | 0.9983 | EXP 149 of 150         | 0.1096215 ± 0.0064726  | 0.0076 | EXP 150 of 150         | 8.6541865 ± 0.0069439  | 0.9953 | EXP 149 of 150         | 61.312135 ± 0.016862   | 0.9966 | EXP 150 of 150         |
| 23F04071            | 22.9 % | 0.0600541 ± 0.0003824  | 0.0023 | EXP 149 of 150         | 16.096007 ± 0.007401   | 0.9983 | EXP 150 of 150         | 0.1099868 ± 0.0060818  | 0.0572 | EXP 150 of 150         | 7.6758181 ± 0.0067870  | 0.9944 | EXP 146 of 150         | 55.203084 ± 0.020656   | 0.9918 | EXP 150 of 150         |
| 23F04073            | 23.7 % | 0.0548035 ± 0.0003848  | 0.0012 | EXP 150 of 150         | 14.254140 ± 0.007876   | 0.9975 | EXP 150 of 150         | 0.0856258 ± 0.0061897  | 0.0047 | EXP 150 of 150         | 6.6857647 ± 0.0071692  | 0.9913 | EXP 150 of 150         | 48.527370 ± 0.017983   | 0.9882 | EXP 148 of 150         |

| Sample Parameters |        | Sample    | Material   | Location     | Standard Name    | Standard (in Ma) | %1σ   | Standard Reference  | Standard 40Ar/39Ar | %1σ   | J          | %1σ   | Air 40Ar/36Ar | %1σ   | MDF (lin) | %1σ   | Volume Ratio | Sensitivity (mol/volt) | Day | Month | Year | Hour | Min | Resist | Analyst     | Project             | Experiment | Nmb |
|-------------------|--------|-----------|------------|--------------|------------------|------------------|-------|---------------------|--------------------|-------|------------|-------|---------------|-------|-----------|-------|--------------|------------------------|-----|-------|------|------|-----|--------|-------------|---------------------|------------|-----|
| 23F04031          | 0.7 %  | LMF-19-80 | Groundmass | Leslie Gulch | FCT-NM (5D20-22) | 28.201           | 0.082 | Kuiper et al (2008) | 9.49923            | 0.108 | 0.00163439 | 0.108 | 303.128       | 0.155 | 0.9962277 | 0.046 | 1            | 3.54E-14               | 16  | FEB   | 2023 | 23   | 12  | 1      | Dan Miggins | Oregon\Mass (22-34) | 23F04028   | 01  |
| 23F04033          | 0.9 %  | LMF-19-80 | Groundmass | Leslie Gulch | FCT-NM (5D20-22) | 28.201           | 0.082 | Kuiper et al (2008) | 9.49923            | 0.108 | 0.00163439 | 0.108 | 303.128       | 0.155 | 0.9962277 | 0.046 | 1            | 3.54E-14               | 16  | FEB   | 2023 | 23   | 39  | 1      | Dan Miggins | Oregon\Mass (22-34) | 23F04028   | 01  |
| 23F04034          | 1.2 %  | LMF-19-80 | Groundmass | Leslie Gulch | FCT-NM (5D20-22) | 28.201           | 0.082 | Kuiper et al (2008) | 9.49923            | 0.108 | 0.00163439 | 0.108 | 303.128       | 0.155 | 0.9962277 | 0.046 | 1            | 3.54E-14               | 16  | FEB   | 2023 | 23   | 52  | 1      | Dan Miggins | Oregon\Mass (22-34) | 23F04028   | 01  |
| 23F04035          | 1.8 %  | LMF-19-80 | Groundmass | Leslie Gulch | FCT-NM (5D20-22) | 28.201           | 0.082 | Kuiper et al (2008) | 9.49923            | 0.108 | 0.00163439 | 0.108 | 303.128       | 0.155 | 0.9962277 | 0.046 | 1            | 3.54E-14               | 17  | FEB   | 2023 | 0    | 5   | 1      | Dan Miggins | Oregon\Mass (22-34) | 23F04028   | 01  |
| 23F04037          | 2.3 %  | LMF-19-80 | Groundmass | Leslie Gulch | FCT-NM (5D20-22) | 28.201           | 0.082 | Kuiper et al (2008) | 9.49923            | 0.108 | 0.00163439 | 0.108 | 303.128       | 0.155 | 0.9962277 | 0.046 | 1            | 3.54E-14               | 17  | FEB   | 2023 | 0    | 31  | 1      | Dan Miggins | Oregon\Mass (22-34) | 23F04028   | 01  |
| 23F04038          | 2.8 %  | LMF-19-80 | Groundmass | Leslie Gulch | FCT-NM (5D20-22) | 28.201           | 0.082 | Kuiper et al (2008) | 9.49923            | 0.108 | 0.00163439 | 0.108 | 303.128       | 0.155 | 0.9962277 | 0.046 | 1            | 3.54E-14               | 17  | FEB   | 2023 | 0    | 44  | 1      | Dan Miggins | Oregon\Mass (22-34) | 23F04028   | 01  |
| 23F04039          | 3.4 %  | LMF-19-80 | Groundmass | Leslie Gulch | FCT-NM (5D20-22) | 28.201           | 0.082 | Kuiper et al (2008) | 9.49923            | 0.108 | 0.00163439 | 0.108 | 303.128       | 0.155 | 0.9962277 | 0.046 | 1            | 3.54E-14               | 17  | FEB   | 2023 | 0    | 57  | 1      | Dan Miggins | Oregon\Mass (22-34) | 23F04028   | 01  |
| 23F04041          | 4.0 %  | LMF-19-80 | Groundmass | Leslie Gulch | FCT-NM (5D20-22) | 28.201           | 0.082 | Kuiper et al (2008) | 9.49923            | 0.108 | 0.00163439 | 0.108 | 303.128       | 0.155 | 0.9962277 | 0.046 | 1            | 3.54E-14               | 17  | FEB   | 2023 | 1    | 24  | 1      | Dan Miggins | Oregon\Mass (22-34) | 23F04028   | 01  |
| 23F04042          | 4.7 %  | LMF-19-80 | Groundmass | Leslie Gulch | FCT-NM (5D20-22) | 28.201           | 0.082 | Kuiper et al (2008) | 9.49923            | 0.108 | 0.00163439 | 0.108 | 303.128       | 0.155 | 0.9962277 | 0.046 | 1            | 3.54E-14               | 17  | FEB   | 2023 | 1    | 37  | 1      | Dan Miggins | Oregon\Mass (22-34) | 23F04028   | 01  |
| 23F04043          | 5.3 %  | LMF-19-80 | Groundmass | Leslie Gulch | FCT-NM (5D20-22) | 28.201           | 0.082 | Kuiper et al (2008) | 9.49923            | 0.108 | 0.00163439 | 0.108 | 303.128       | 0.155 | 0.9962277 | 0.046 | 1            | 3.54E-14               | 17  | FEB   | 2023 | 1    | 50  | 1      | Dan Miggins | Oregon\Mass (22-34) | 23F04028   | 01  |
| 23F04045          | 6.0 %  | LMF-19-80 | Groundmass | Leslie Gulch | FCT-NM (5D20-22) | 28.201           | 0.082 | Kuiper et al (2008) | 9.49923            | 0.108 | 0.00163439 | 0.108 | 303.128       | 0.155 | 0.9962277 | 0.046 | 1            | 3.54E-14               | 17  | FEB   | 2023 | 2    | 16  | 1      | Dan Miggins | Oregon\Mass (22-34) | 23F04028   | 01  |
| 23F04046          | 6.8 %  | LMF-19-80 | Groundmass | Leslie Gulch | FCT-NM (5D20-22) | 28.201           | 0.082 | Kuiper et al (2008) | 9.49923            | 0.108 | 0.00163439 | 0.108 | 303.128       | 0.155 | 0.9962277 | 0.046 | 1            | 3.54E-14               | 17  | FEB   | 2023 | 2    | 29  | 1      | Dan Miggins | Oregon\Mass (22-34) | 23F04028   | 01  |
| 23F04047          | 7.5 %  | LMF-19-80 | Groundmass | Leslie Gulch | FCT-NM (5D20-22) | 28.201           | 0.082 | Kuiper et al (2008) | 9.49923            | 0.108 | 0.00163439 | 0.108 | 303.128       | 0.155 | 0.9962277 | 0.046 | 1            | 3.54E-14               | 17  | FEB   | 2023 | 2    | 43  | 1      | Dan Miggins | Oregon\Mass (22-34) | 23F04028   | 01  |
| 23F04049          | 8.3 %  | LMF-19-80 | Groundmass | Leslie Gulch | FCT-NM (5D20-22) | 28.201           | 0.082 | Kuiper et al (2008) | 9.49923            | 0.108 | 0.00163439 | 0.108 | 303.128       | 0.155 | 0.9962277 | 0.046 | 1            | 3.54E-14               | 17  | FEB   | 2023 | 3    | 9   | 1      | Dan Miggins | Oregon\Mass (22-34) | 23F04028   | 01  |
| 23F04050          | 9.1 %  | LMF-19-80 | Groundmass | Leslie Gulch | FCT-NM (5D20-22) | 28.201           | 0.082 | Kuiper et al (2008) | 9.49923            | 0.108 | 0.00163439 | 0.108 | 303.128       | 0.155 | 0.9962277 | 0.046 | 1            | 3.54E-14               | 17  | FEB   | 2023 | 3    | 22  | 1      | Dan Miggins | Oregon\Mass (22-34) | 23F04028   | 01  |
| 23F04051          | 10.1 % | LMF-19-80 | Groundmass | Leslie Gulch | FCT-NM (5D20-22) | 28.201           | 0.082 | Kuiper et al (2008) | 9.49923            | 0.108 | 0.00163439 | 0.108 | 303.128       | 0.155 | 0.9962277 | 0.046 | 1            | 3.54E-14               | 17  | FEB   | 2023 | 3    | 35  | 1      | Dan Miggins | Oregon\Mass (22-34) | 23F04028   | 01  |
| 23F04053          | 10.5 % | LMF-19-80 | Groundmass | Leslie Gulch | FCT-NM (5D20-22) | 28.201           | 0.082 | Kuiper et al (2008) | 9.49923            | 0.108 | 0.00163439 | 0.108 | 303.128       | 0.155 | 0.9962277 | 0.046 | 1            | 3.54E-14               | 17  | FEB   | 2023 | 4    | 1   | 1      | Dan Miggins | Oregon\Mass (22-34) | 23F04028   | 01  |
| 23F04054          | 11.0 % | LMF-19-80 | Groundmass | Leslie Gulch | FCT-NM (5D20-22) | 28.201           | 0.082 | Kuiper et al (2008) | 9.49923            | 0.108 | 0.00163439 | 0.108 | 303.128       | 0.155 | 0.9962277 | 0.046 | 1            | 3.54E-14               | 17  | FEB   | 2023 | 4    | 14  | 1      | Dan Miggins | Oregon\Mass (22-34) | 23F04028   | 01  |
| 23F04055          | 11.5 % | LMF-19-80 | Groundmass | Leslie Gulch | FCT-NM (5D20-22) | 28.201           | 0.082 | Kuiper et al (2008) | 9.49923            | 0.108 | 0.00163439 | 0.108 | 303.128       | 0.155 | 0.9962277 | 0.046 | 1            | 3.54E-14               | 17  | FEB   | 2023 | 4    | 28  | 1      | Dan Miggins | Oregon\Mass (22-34) | 23F04028   | 01  |
| 23F04057          | 12.0 % | LMF-19-80 | Groundmass | Leslie Gulch | FCT-NM (5D20-22) | 28.201           | 0.082 | Kuiper et al (2008) | 9.49923            | 0.108 | 0.00163439 | 0.108 | 303.128       | 0.155 | 0.9962277 | 0.046 | 1            | 3.54E-14               | 17  | FEB   | 2023 | 4    | 54  | 1      | Dan Miggins | Oregon\Mass (22-34) | 23F04028   | 01  |
| 23F04058          | 12.5 % | LMF-19-80 | Groundmass | Leslie Gulch | FCT-NM (5D20-22) | 28.201           | 0.082 | Kuiper et al (2008) | 9.49923            | 0.108 | 0.00163439 | 0.108 | 303.128       | 0.155 | 0.9962277 | 0.046 | 1            | 3.54E-14               | 17  | FEB   | 2023 | 5    | 7   | 1      | Dan Miggins | Oregon\Mass (22-34) | 23F04028   | 01  |
| 23F04059          | 13.0 % | LMF-19-80 | Groundmass | Leslie Gulch | FCT-NM (5D20-22) | 28.201           | 0.082 | Kuiper et al (2008) | 9.49923            | 0.108 | 0.00163439 | 0.108 | 303.128       | 0.155 | 0.9962277 | 0.046 | 1            | 3.54E-14               | 17  | FEB   | 2023 | 5    | 20  | 1      | Dan Miggins | Oregon\Mass (22-34) | 23F04028   | 01  |
| 23F04061          | 14.3 % | LMF-19-80 | Groundmass | Leslie Gulch | FCT-NM (5D20-22) | 28.201           | 0.082 | Kuiper et al (2008) | 9.49923            | 0.108 | 0.00163439 | 0.108 | 303.128       | 0.155 | 0.9962277 | 0.046 | 1            | 3.54E-14               | 17  | FEB   | 2023 | 5    | 46  | 1      | Dan Miggins | Oregon\Mass (22-34) | 23F04028   | 01  |
| 23F04062          | 15.5 % | LMF-19-80 | Groundmass | Leslie Gulch | FCT-NM (5D20-22) | 28.201           | 0.082 | Kuiper et al (2008) | 9.49923            | 0.108 | 0.00163439 | 0.108 | 303.128       | 0.155 | 0.9962277 | 0.046 | 1            | 3.54E-14               | 17  | FEB   | 2023 | 6    | 0   | 1      | Dan Miggins | Oregon\Mass (22-34) | 23F04028   | 01  |
| 23F04063          | 16.5 % | LMF-19-80 | Groundmass | Leslie Gulch | FCT-NM (5D20-22) | 28.201           | 0.082 | Kuiper et al (2008) | 9.49923            | 0.108 | 0.00163439 | 0.108 | 303.128       | 0.155 | 0.9962277 | 0.046 | 1            | 3.54E-14               | 17  | FEB   | 2023 | 6    | 13  | 1      | Dan Miggins | Oregon\Mass (22-34) | 23F04028   | 01  |
| 23F04065          | 17.6 % | LMF-19-80 | Groundmass | Leslie Gulch | FCT-NM (5D20-22) | 28.201           | 0.082 | Kuiper et al (2008) | 9.49923            | 0.108 | 0.00163439 | 0.108 | 303.128       | 0.155 | 0.9962277 | 0.046 | 1            | 3.54E-14               | 17  | FEB   | 2023 | 6    | 39  | 1      | Dan Miggins | Oregon\Mass (22-34) | 23F04028   | 01  |
| 23F04066          | 18.6 % | LMF-19-80 | Groundmass | Leslie Gulch | FCT-NM (5D20-22) | 28.201           | 0.082 | Kuiper et al (2008) | 9.49923            | 0.108 | 0.00163439 | 0.108 | 303.128       | 0.155 | 0.9962277 | 0.046 | 1            | 3.54E-14               | 17  | FEB   | 2023 | 6    | 52  | 1      | Dan Miggins | Oregon\Mass (22-34) | 23F04028   | 01  |
| 23F04067          | 19.8 % | LMF-19-80 | Groundmass | Leslie Gulch | FCT-NM (5D20-22) | 28.201           | 0.082 | Kuiper et al (2008) | 9.49923            | 0.108 | 0.00163439 | 0.108 | 303.128       | 0.155 | 0.9962277 | 0.046 | 1            | 3.54E-14               | 17  | FEB   | 2023 | 7    | 5   | 1      | Dan Miggins | Oregon\Mass (22-34) | 23F04028   | 01  |
| 23F04069          | 21.2 % | LMF-19-80 | Groundmass | Leslie Gulch | FCT-NM (5D20-22) | 28.201           | 0.082 | Kuiper et al (2008) | 9.49923            | 0.108 | 0.00163439 | 0.108 | 303.128       | 0.155 | 0.9962277 | 0.046 | 1            | 3.54E-14               | 17  | FEB   | 2023 | 7    | 32  | 1      | Dan Miggins | Oregon\Mass (22-34) | 23F04028   | 01  |
| 23F04070          | 22.0 % | LMF-19-80 | Groundmass | Leslie Gulch | FCT-NM (5D20-22) | 28.201           | 0.082 | Kuiper et al (2008) | 9.49923            | 0.108 | 0.00163439 | 0.108 | 303.128       | 0.155 | 0.9962277 | 0.046 | 1            | 3.54E-14               | 17  | FEB   | 2023 | 7    | 45  | 1      | Dan Miggins | Oregon\Mass (22-34) | 23F04028   | 01  |
| 23F04071          | 22.9 % | LMF-19-80 | Groundmass | Leslie Gulch | FCT-NM (5D20-22) | 28.201           | 0.082 | Kuiper et al (2008) | 9.49923            | 0.108 | 0.00163439 | 0.108 | 303.128       | 0.155 | 0.9962277 | 0.046 | 1            | 3.54E-14               | 17  | FEB   | 2023 | 7    | 58  | 1      | Dan Miggins | Oregon\Mass (22-34) | 23F04028   | 01  |
| 23F04073          | 23.7 % | LMF-19-80 | Groundmass | Leslie Gulch | FCT-NM (5D20-22) | 28.201           | 0.082 | Kuiper et al (2008) | 9.49923            | 0.108 | 0.00163439 | 0.108 | 303.128       | 0.155 | 0.9962277 | 0.046 | 1            | 3.54E-14               | 17  | FEB   | 2023 | 8    | 24  | 1      | Dan Miggins | Oregon\Mass (22-34) | 23F04028   | 01  |

| Irradiation Constants |        | 40/36(a) |       | %1σ   | 40/36(c) |        | %1σ   | 38/36(a) |   | %1σ      | 38/36(c) |         | %1σ  | 39/37(ca) |      | %1σ      | 38/37(ca) |          | %1σ  | 36/37(ca) |   | %1σ  | 40/39(k) |   | %1σ | 38/39(k) |   | %1σ | 36/38(cl) |   | %1σ  | K/Ca | %1σ | K/Cl | %1σ | Ca/Cl | %1σ | Irradiation | X-pos | Y-pos | Z/H-pos   |           |        |        |       |
|-----------------------|--------|----------|-------|-------|----------|--------|-------|----------|---|----------|----------|---------|------|-----------|------|----------|-----------|----------|------|-----------|---|------|----------|---|-----|----------|---|-----|-----------|---|------|------|-----|------|-----|-------|-----|-------------|-------|-------|-----------|-----------|--------|--------|-------|
|                       |        |          |       |       |          |        |       |          |   |          |          |         |      |           |      |          |           |          |      |           |   |      |          |   |     |          |   |     |           |   |      |      |     |      |     |       |     |             |       |       |           |           |        |        |       |
| 23F04031              | 0.7 %  | 298.56   | 0.104 | 0.018 | 35       | 0.1885 | 0.159 | 1.493    | 3 | 0.000643 | 0.92     | 0.00018 | 9.63 | 0.00027   | 0.17 | 0.000607 | 9.65      | 0.012077 | 0.09 | 0         | 0 | 0.43 | 0        | 0 | 0   | 0        | 0 | 0   | 0         | 0 | 0.43 | 0    | 0   | 0    | 0   | 0     | 0   | 0           | 0     | 0     | 22-OSU-05 | 999.00    | 999.00 | 34.83  |       |
| 23F04033              | 0.9 %  | 298.56   | 0.104 | 0.018 | 35       | 0.1885 | 0.159 | 1.493    | 3 | 0.000643 | 0.92     | 0.00018 | 9.63 | 0.00027   | 0.17 | 0.000607 | 9.65      | 0.012077 | 0.09 | 0         | 0 | 0.43 | 0        | 0 | 0   | 0        | 0 | 0   | 0         | 0 | 0.43 | 0    | 0   | 0    | 0   | 0     | 0   | 0           | 0     | 0     | 0         | 22-OSU-05 | 999.00 | 999.00 | 34.83 |
| 23F04034              | 1.2 %  | 298.56   | 0.104 | 0.018 | 35       | 0.1885 | 0.159 | 1.493    | 3 | 0.000643 | 0.92     | 0.00018 | 9.63 | 0.00027   | 0.17 | 0.000607 | 9.65      | 0.012077 | 0.09 | 0         | 0 | 0.43 | 0        | 0 | 0   | 0        | 0 | 0   | 0         | 0 | 0.43 | 0    | 0   | 0    | 0   | 0     | 0   | 0           | 0     | 0     | 0         | 22-OSU-05 | 999.00 | 999.00 | 34.83 |
| 23F04035              | 1.8 %  | 298.56   | 0.104 | 0.018 | 35       | 0.1885 | 0.159 | 1.493    | 3 | 0.000643 | 0.92     | 0.00018 | 9.63 | 0.00027   | 0.17 | 0.000607 | 9.65      | 0.012077 | 0.09 | 0         | 0 | 0.43 | 0        | 0 | 0   | 0        | 0 | 0   | 0         | 0 | 0.43 | 0    | 0   | 0    | 0   | 0     | 0   | 0           | 0     | 0     | 0         | 22-OSU-05 | 999.00 | 999.00 | 34.83 |
| 23F04037              | 2.3 %  | 298.56   | 0.104 | 0.018 | 35       | 0.1885 | 0.159 | 1.493    | 3 | 0.000643 | 0.92     | 0.00018 | 9.63 | 0.00027   | 0.17 | 0.000607 | 9.65      | 0.012077 | 0.09 | 0         | 0 | 0.43 | 0        | 0 | 0   | 0        | 0 | 0   | 0         | 0 | 0.43 | 0    | 0   | 0    | 0   | 0     | 0   | 0           | 0     | 0     | 0         | 22-OSU-05 | 999.00 | 999.00 | 34.83 |
| 23F04038              | 2.8 %  | 298.56   | 0.104 | 0.018 | 35       | 0.1885 | 0.159 | 1.493    | 3 | 0.000643 | 0.92     | 0.00018 | 9.63 | 0.00027   | 0.17 | 0.000607 | 9.65      | 0.012077 | 0.09 | 0         | 0 | 0.43 | 0        | 0 | 0   | 0        | 0 | 0   | 0         | 0 | 0.43 | 0    | 0   | 0    | 0   | 0     | 0   | 0           | 0     | 0     | 0         | 22-OSU-05 | 999.00 | 999.00 | 34.83 |
| 23F04039              | 3.4 %  | 298.56   | 0.104 | 0.018 | 35       | 0.1885 | 0.159 | 1.493    | 3 | 0.000643 | 0.92     | 0.00018 | 9.63 | 0.00027   | 0.17 | 0.000607 | 9.65      | 0.012077 | 0.09 | 0         | 0 | 0.43 | 0        | 0 | 0   | 0        | 0 | 0   | 0         | 0 | 0.43 | 0    | 0   | 0    | 0   | 0     | 0   | 0           | 0     | 0     | 0         | 22-OSU-05 | 999.00 | 999.00 | 34.83 |
| 23F04041              | 4.0 %  | 298.56   | 0.104 | 0.018 | 35       | 0.1885 | 0.159 | 1.493    | 3 | 0.000643 | 0.92     | 0.00018 | 9.63 | 0.00027   | 0.17 | 0.000607 | 9.65      | 0.012077 | 0.09 | 0         | 0 | 0.43 | 0        | 0 | 0   | 0        | 0 | 0   | 0         | 0 | 0.43 | 0    | 0   | 0    | 0   | 0     | 0   | 0           | 0     | 0     | 0         | 22-OSU-05 | 999.00 | 999.00 | 34.83 |
| 23F04042              | 4.7 %  | 298.56   | 0.104 | 0.018 | 35       | 0.1885 | 0.159 | 1.493    | 3 | 0.000643 | 0.92     | 0.00018 | 9.63 | 0.00027   | 0.17 | 0.000607 | 9.65      | 0.012077 | 0.09 | 0         | 0 | 0.43 | 0        | 0 | 0   | 0        | 0 | 0   | 0         | 0 | 0.43 | 0    | 0   | 0    | 0   | 0     | 0   | 0           | 0     | 0     | 0         | 22-OSU-05 | 999.00 | 999.00 | 34.83 |
| 23F04043              | 5.3 %  | 298.56   | 0.104 | 0.018 | 35       | 0.1885 | 0.159 | 1.493    | 3 | 0.000643 | 0.92     | 0.00018 | 9.63 | 0.00027   | 0.17 | 0.000607 | 9.65      | 0.012077 | 0.09 | 0         | 0 | 0.43 | 0        | 0 | 0   | 0        | 0 | 0   | 0         | 0 | 0.43 | 0    | 0   | 0    | 0   | 0     | 0   | 0           | 0     | 0     | 0         | 22-OSU-05 | 999.00 | 999.00 | 34.83 |
| 23F04045              | 6.0 %  | 298.56   | 0.104 | 0.018 | 35       | 0.1885 | 0.159 | 1.493    | 3 | 0.000643 | 0.92     | 0.00018 | 9.63 | 0.00027   | 0.17 | 0.000607 | 9.65      | 0.012077 | 0.09 | 0         | 0 | 0.43 | 0        | 0 | 0   | 0        | 0 | 0   | 0         | 0 | 0.43 | 0    | 0   | 0    | 0   | 0     | 0   | 0           | 0     | 0     | 0         | 22-OSU-05 | 999.00 | 999.00 | 34.83 |
| 23F04046              | 6.8 %  | 298.56   | 0.104 | 0.018 | 35       | 0.1885 | 0.159 | 1.493    | 3 | 0.000643 | 0.92     | 0.00018 | 9.63 | 0.00027   | 0.17 | 0.000607 | 9.65      | 0.012077 | 0.09 | 0         | 0 | 0.43 | 0        | 0 | 0   | 0        | 0 | 0   | 0         | 0 | 0.43 | 0    | 0   | 0    | 0   | 0     | 0   | 0           | 0     | 0     | 0         | 22-OSU-05 | 999.00 | 999.00 | 34.83 |
| 23F04047              | 7.5 %  | 298.56   | 0.104 | 0.018 | 35       | 0.1885 | 0.159 | 1.493    | 3 | 0.000643 | 0.92     | 0.00018 | 9.63 | 0.00027   | 0.17 | 0.000607 | 9.65      | 0.012077 | 0.09 | 0         | 0 | 0.43 | 0        | 0 | 0   | 0        | 0 | 0   | 0         | 0 | 0.43 | 0    | 0   | 0    | 0   | 0     | 0   | 0           | 0     | 0     | 0         | 22-OSU-05 | 999.00 | 999.00 | 34.83 |
| 23F04049              | 8.3 %  | 298.56   | 0.104 | 0.018 | 35       | 0.1885 | 0.159 | 1.493    | 3 | 0.000643 | 0.92     | 0.00018 | 9.63 | 0.00027   | 0.17 | 0.000607 | 9.65      | 0.012077 | 0.09 | 0         | 0 | 0.43 | 0        | 0 | 0   | 0        | 0 | 0   | 0         | 0 | 0.43 | 0    | 0   | 0    | 0   | 0     | 0   | 0           | 0     | 0     | 0         | 22-OSU-05 | 999.00 | 999.00 | 34.83 |
| 23F04050              | 9.1 %  | 298.56   | 0.104 | 0.018 | 35       | 0.1885 | 0.159 | 1.493    | 3 | 0.000643 | 0.92     | 0.00018 | 9.63 | 0.00027   | 0.17 | 0.000607 | 9.65      | 0.012077 | 0.09 | 0         | 0 | 0.43 | 0        | 0 | 0   | 0        | 0 | 0   | 0         | 0 | 0.43 | 0    | 0   | 0    | 0   | 0     | 0   | 0           | 0     | 0     | 0         | 22-OSU-05 | 999.00 | 999.00 | 34.83 |
| 23F04051              | 10.1 % | 298.56   | 0.104 | 0.018 | 35       | 0.1885 | 0.159 | 1.493    | 3 | 0.000643 | 0.92     | 0.00018 | 9.63 | 0.00027   | 0.17 | 0.000607 | 9.65      | 0.012077 | 0.09 | 0         | 0 | 0.43 | 0        | 0 | 0   | 0        | 0 | 0   | 0         | 0 | 0.43 | 0    | 0   | 0    | 0   | 0     | 0   | 0           | 0     | 0     | 0         | 22-OSU-05 | 999.00 | 999.00 | 34.83 |
| 23F04053              | 10.5 % | 298.56   | 0.104 | 0.018 | 35       | 0.1885 | 0.159 | 1.493    | 3 | 0.000643 | 0.92     | 0.00018 | 9.63 | 0.00027   | 0.17 | 0.000607 | 9.65      | 0.012077 | 0.09 | 0         | 0 | 0.43 | 0        | 0 | 0   | 0        | 0 | 0   | 0         | 0 | 0.43 | 0    | 0   | 0    | 0   | 0     | 0   | 0           | 0     | 0     | 0         | 22-OSU-05 | 999.00 | 999.00 | 34.83 |
| 23F04054              | 11.0 % | 298.56   | 0.104 | 0.018 | 35       | 0.1885 | 0.159 | 1.493    | 3 | 0.000643 | 0.92     | 0.00018 | 9.63 | 0.00027   | 0.17 | 0.000607 | 9.65      | 0.012077 | 0.09 | 0         | 0 | 0.43 | 0        | 0 | 0   | 0        | 0 | 0   | 0         | 0 | 0.43 | 0    | 0   | 0    | 0   | 0     | 0   | 0           | 0     | 0     | 0         | 22-OSU-05 | 999.00 | 999.00 | 34.83 |
| 23F04055              | 11.5 % | 298.56   | 0.104 | 0.018 | 35       | 0.1885 | 0.159 | 1.493    | 3 | 0.000643 | 0.92     | 0.00018 | 9.63 | 0.00027   | 0.17 | 0.000607 | 9.65      | 0.012077 | 0.09 | 0         | 0 | 0.43 | 0        | 0 | 0   | 0        | 0 | 0   | 0         | 0 | 0.43 | 0    | 0   | 0    | 0   | 0     | 0   | 0           | 0     | 0     | 0         | 22-OSU-05 | 999.00 | 999.00 | 34.83 |
| 23F04057              | 12.0 % | 298.56   | 0.104 | 0.018 | 35       | 0.1885 | 0.159 | 1.493    | 3 | 0.000643 | 0.92     | 0.00018 | 9.63 | 0.00027   | 0.17 | 0.000607 | 9.65      | 0.012077 | 0.09 | 0         | 0 | 0.43 | 0        | 0 | 0   | 0        | 0 | 0   | 0         | 0 | 0.43 | 0    | 0   | 0    | 0   | 0     | 0   | 0           | 0     | 0     | 0         | 22-OSU-05 | 999.00 | 999.00 | 34.83 |
| 23F04058              | 12.5 % | 298.56   | 0.104 | 0.018 | 35       | 0.1885 | 0.159 | 1.493    | 3 | 0.000643 | 0.92     | 0.00018 | 9.63 | 0.00027   | 0.17 | 0.000607 | 9.65      | 0.012077 | 0.09 | 0         | 0 | 0.43 | 0        | 0 | 0   | 0        | 0 | 0   | 0         | 0 | 0.43 | 0    | 0   | 0    | 0   | 0     | 0   | 0           | 0     | 0     | 0         | 22-OSU-05 | 999.00 | 999.00 | 34.83 |
| 23F04059              | 13.0 % | 298.56   | 0.104 | 0.018 | 35       | 0.1885 | 0.159 | 1.493    | 3 | 0.000643 | 0.92     | 0.00018 | 9.63 | 0.00027   | 0.17 | 0.000607 | 9.65      | 0.012077 | 0.09 | 0         | 0 | 0.43 | 0        | 0 | 0   | 0        | 0 | 0   | 0         | 0 | 0.43 | 0    | 0   | 0    | 0   | 0     | 0   | 0           | 0     | 0     | 0         | 22-OSU-05 | 999.00 | 999.00 | 34.83 |
| 23F04061              | 14.3 % | 298.56   | 0.104 | 0.018 | 35       | 0.1885 | 0.159 | 1.493    | 3 | 0.000643 | 0.92     | 0.00018 | 9.63 | 0.00027   | 0.17 | 0.000607 | 9.65      | 0.012077 | 0.09 | 0         | 0 | 0.43 | 0        | 0 | 0   | 0        | 0 | 0   | 0         | 0 | 0.43 | 0    | 0   | 0    | 0   | 0     | 0   | 0           | 0     | 0     | 0         | 22-OSU-05 | 999.00 | 999.00 | 34.83 |
| 23F04062              | 15.5 % | 298.56   | 0.104 | 0.018 | 35       | 0.1885 | 0.159 | 1.493    | 3 | 0.000643 | 0.92     | 0.00018 | 9.63 | 0.00027   | 0.17 | 0.000607 | 9.65      | 0.012077 | 0.09 | 0         | 0 | 0.43 | 0        | 0 | 0   | 0        | 0 | 0   | 0         | 0 | 0.43 | 0    | 0   | 0    | 0   | 0     | 0   | 0           | 0     | 0     | 0         | 22-OSU-05 | 999.00 | 999.00 | 34.83 |
| 23F04063              | 16.5 % | 298.56   | 0.104 | 0.018 | 35       | 0.1885 | 0.159 | 1.493    | 3 | 0.000643 | 0.92     | 0.00018 | 9.63 | 0.00027   | 0.17 | 0.000607 | 9.65      | 0.012077 | 0.09 | 0         | 0 | 0.43 | 0        | 0 | 0   | 0        | 0 | 0   | 0         | 0 | 0.43 | 0    | 0   | 0    | 0   | 0     | 0   | 0           | 0     | 0     | 0         | 22-OSU-05 | 999.00 | 999.00 | 34.83 |
| 23F04065              | 17.6 % | 298.56   | 0.104 | 0.018 | 35       | 0.1885 | 0.159 | 1.493    | 3 | 0.000643 | 0.92     | 0.00018 | 9.63 | 0.00027   | 0.17 | 0.000607 | 9.65      | 0.012077 | 0.09 | 0         | 0 | 0.43 | 0        | 0 | 0   | 0        | 0 | 0   | 0         | 0 | 0.43 | 0    | 0   | 0    | 0   | 0     | 0   | 0           | 0     | 0     | 0         | 22-OSU-05 | 999.00 | 999.00 | 34.83 |
| 23F04066              | 18.6 % | 298.56   | 0.104 | 0.018 | 35       | 0.1885 | 0.159 | 1.493    | 3 | 0.000643 | 0.92     | 0.00018 | 9.63 | 0.00027   | 0.17 | 0.000607 | 9.65      | 0.012077 | 0.09 | 0         | 0 | 0.43 | 0        | 0 | 0   | 0        | 0 | 0   | 0         | 0 | 0.43 | 0    | 0   | 0    | 0   | 0     | 0   | 0           | 0     | 0     | 0         | 22-OSU-05 | 999.00 | 999.00 | 34.83 |
| 23F04067              | 19.8 % | 298.56   | 0.104 | 0.018 | 35       | 0.1885 | 0.159 | 1.493    | 3 | 0.000643 | 0.92     | 0.00018 | 9.63 | 0.00027   | 0.17 | 0.000607 | 9.65      | 0.012077 | 0.09 | 0         | 0 | 0.43 | 0        | 0 | 0   | 0        | 0 | 0   | 0         | 0 | 0.43 | 0    | 0   | 0    | 0   | 0     | 0   | 0           | 0     | 0     | 0         | 22-OSU-05 | 999.00 | 999.00 | 34.83 |
| 23F04069              | 21.2 % | 298.56   | 0.104 | 0.018 | 35       | 0.1885 | 0.159 | 1.493    | 3 | 0.000643 | 0.92     | 0.00018 | 9.63 | 0.00027   | 0.17 | 0.000607 | 9.65      | 0.012077 | 0.09 | 0         | 0 | 0.43 | 0        | 0 | 0   | 0        | 0 | 0   | 0         | 0 | 0.43 | 0    | 0   | 0    | 0   | 0     | 0   | 0           | 0     | 0     | 0         | 22-OSU-05 | 999.00 | 999.00 | 34.83 |
| 23F04070              | 22.0 % | 298.56   | 0.104 | 0.018 | 35       | 0.1885 | 0.159 | 1.493    | 3 | 0.000643 | 0.92     | 0.00018 | 9.63 | 0.00027   | 0.17 | 0.000607 | 9.65      | 0.012077 | 0.09 | 0         | 0 | 0.43 | 0        | 0 | 0   | 0        | 0 | 0   | 0         | 0 | 0.43 | 0    | 0   | 0    | 0   | 0     | 0   | 0           | 0     | 0     | 0         | 22-OSU-05 | 999.00 | 999.00 | 34.83 |
| 23F04071              | 22.9 % | 298.56   | 0.104 | 0.018 | 35       | 0.1885 | 0.159 | 1.493    | 3 | 0.000643 | 0.92     | 0.00018 |      |           |      |          |           |          |      |           |   |      |          |   |     |          |   |     |           |   |      |      |     |      |     |       |     |             |       |       |           |           |        |        |       |

23F04028.AGE >>> LMF-19-80 >>> OREGON | MASS (22-34) PROJECT

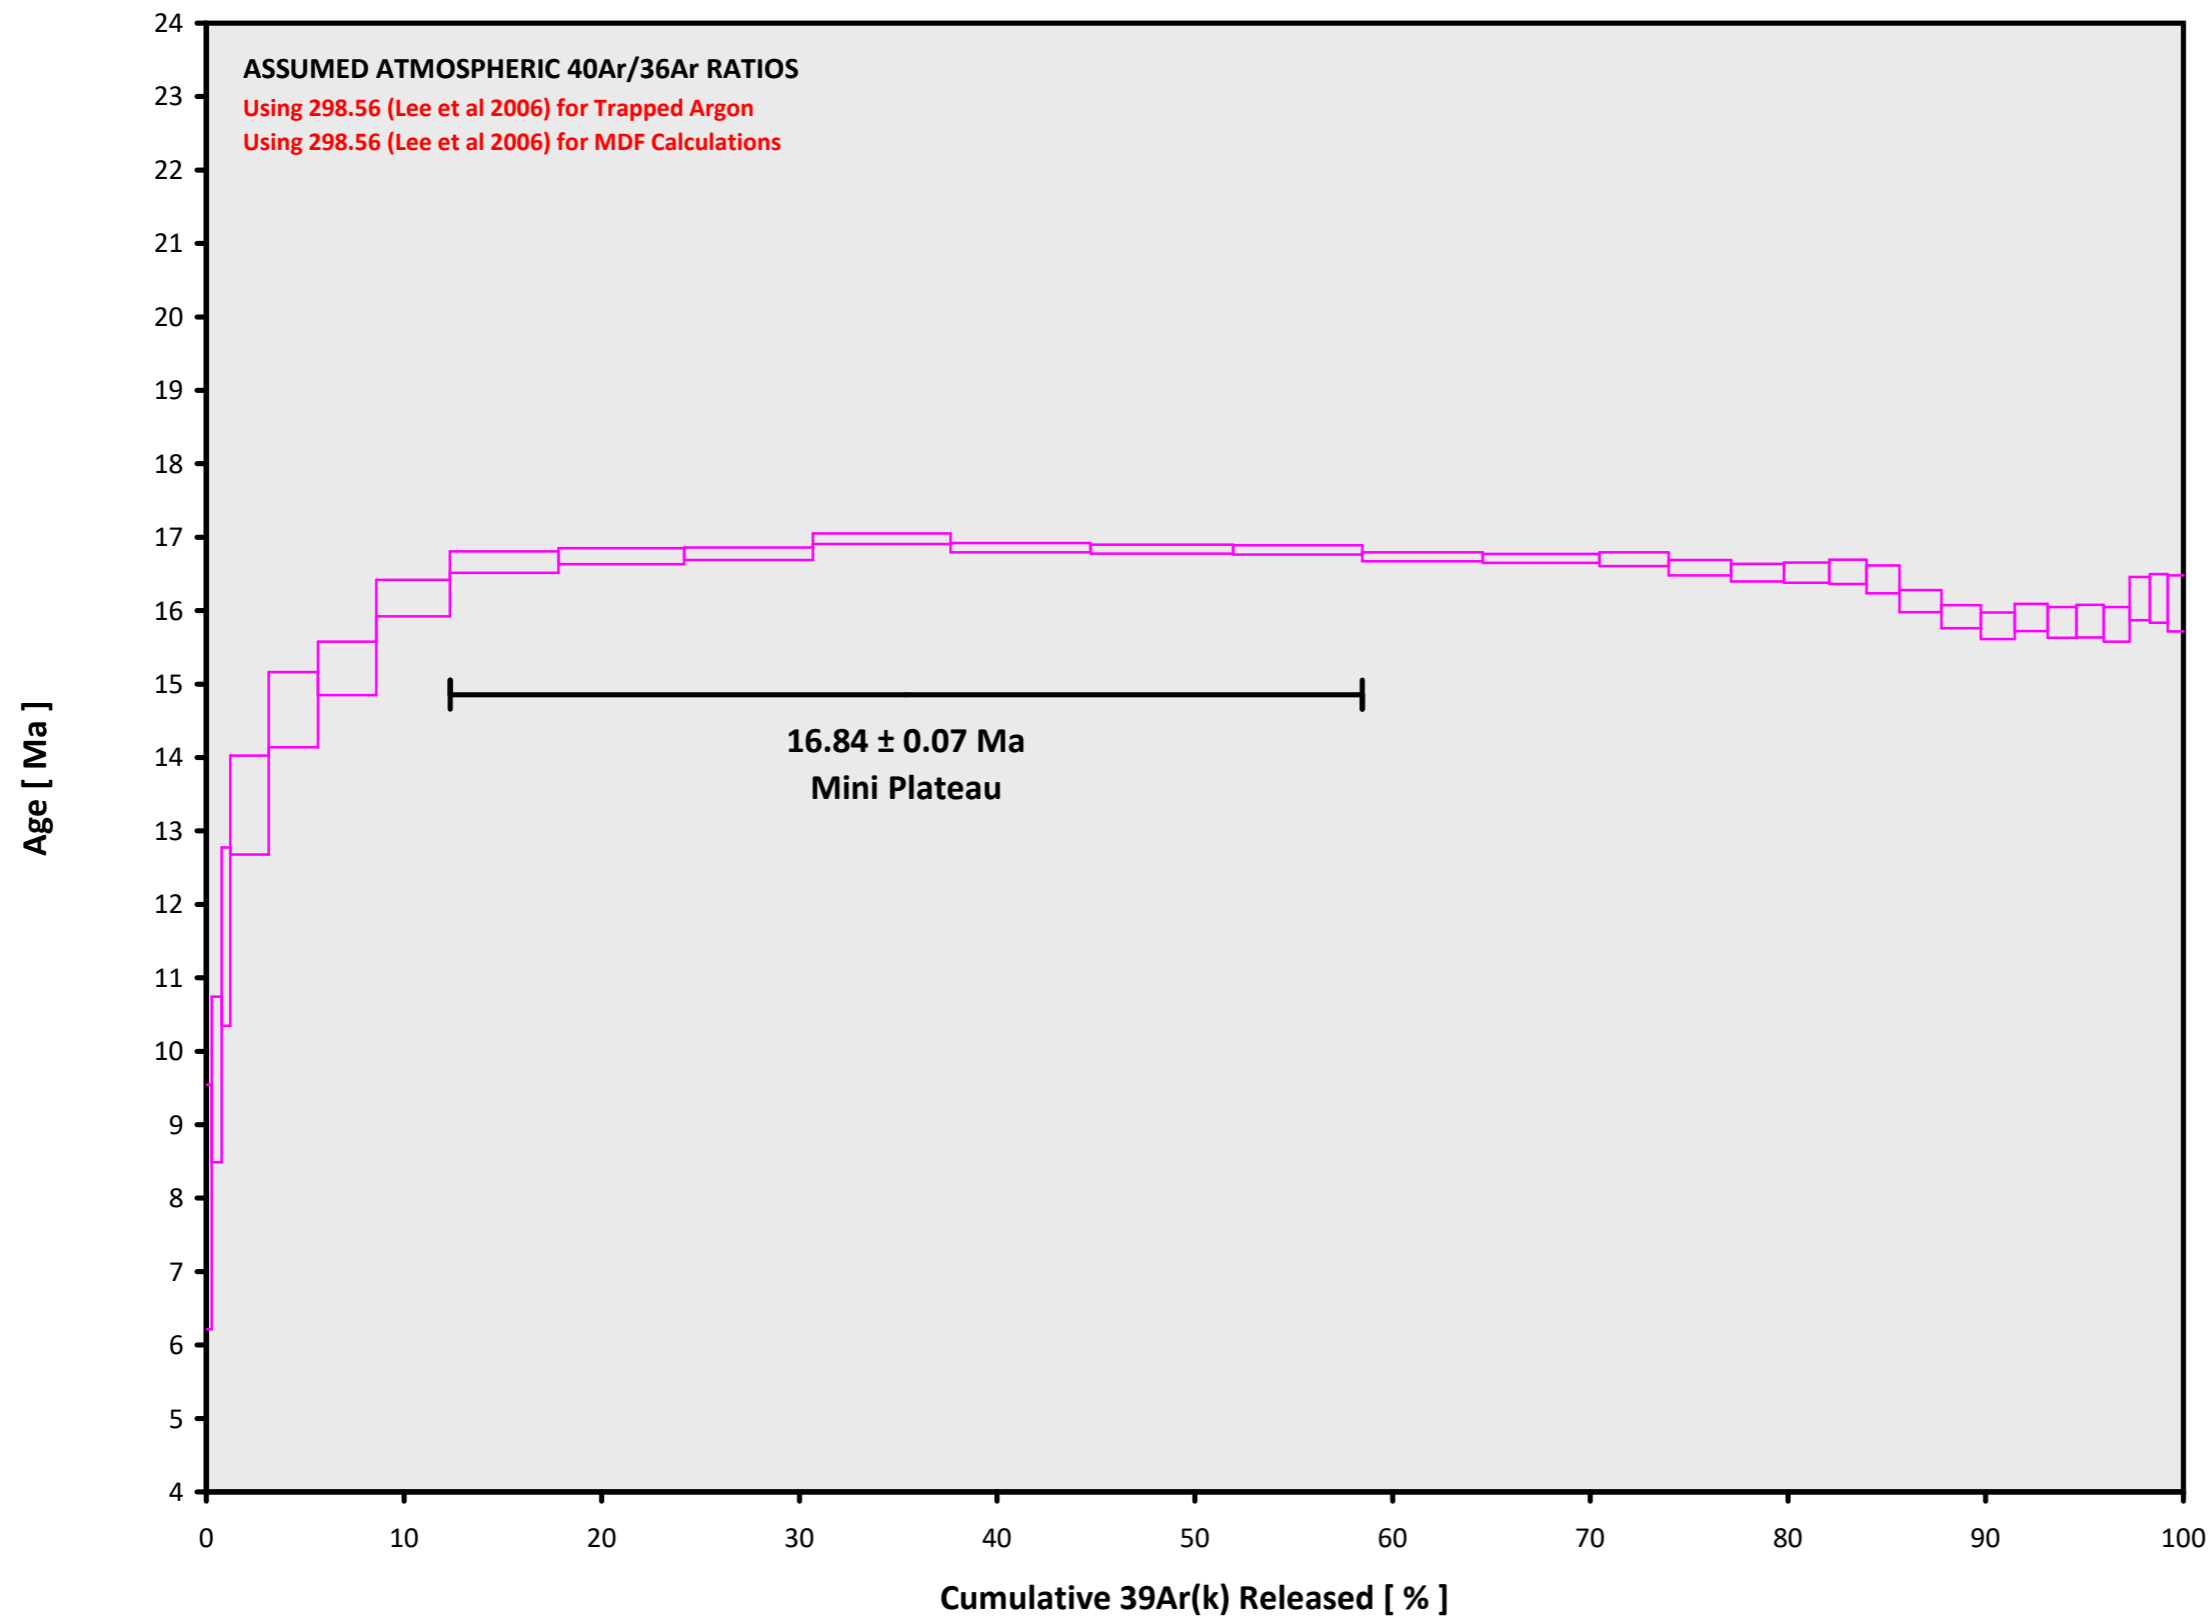

Ar-Ages in Ma

WEIGHTED PLATEAU

16.84 ± 0.07

TOTAL FUSION

16.37 ± 0.05

NORMAL ISOCHRON

16.91 ± 0.11

INVERSE ISOCHRON

16.91 ± 0.11

MSWD (PROBABILITY)

4.43 (0%)

TRAPPED  $^{40}\text{Ar}/^{36}\text{Ar}$  RATIO

Standard  $^{40}/^{36} = 298.56 \pm 0.104\%$ SD

Sample Info

Groundmass

Leslie Gulch

Dan Miggins

IRR = 22-OSU-05 (5D20-22)

J = 0.00163439 ± 0.00000177

23F04028.AGE >>> LMF-19-80 >>> OREGON | MASS (22-34) PROJECT

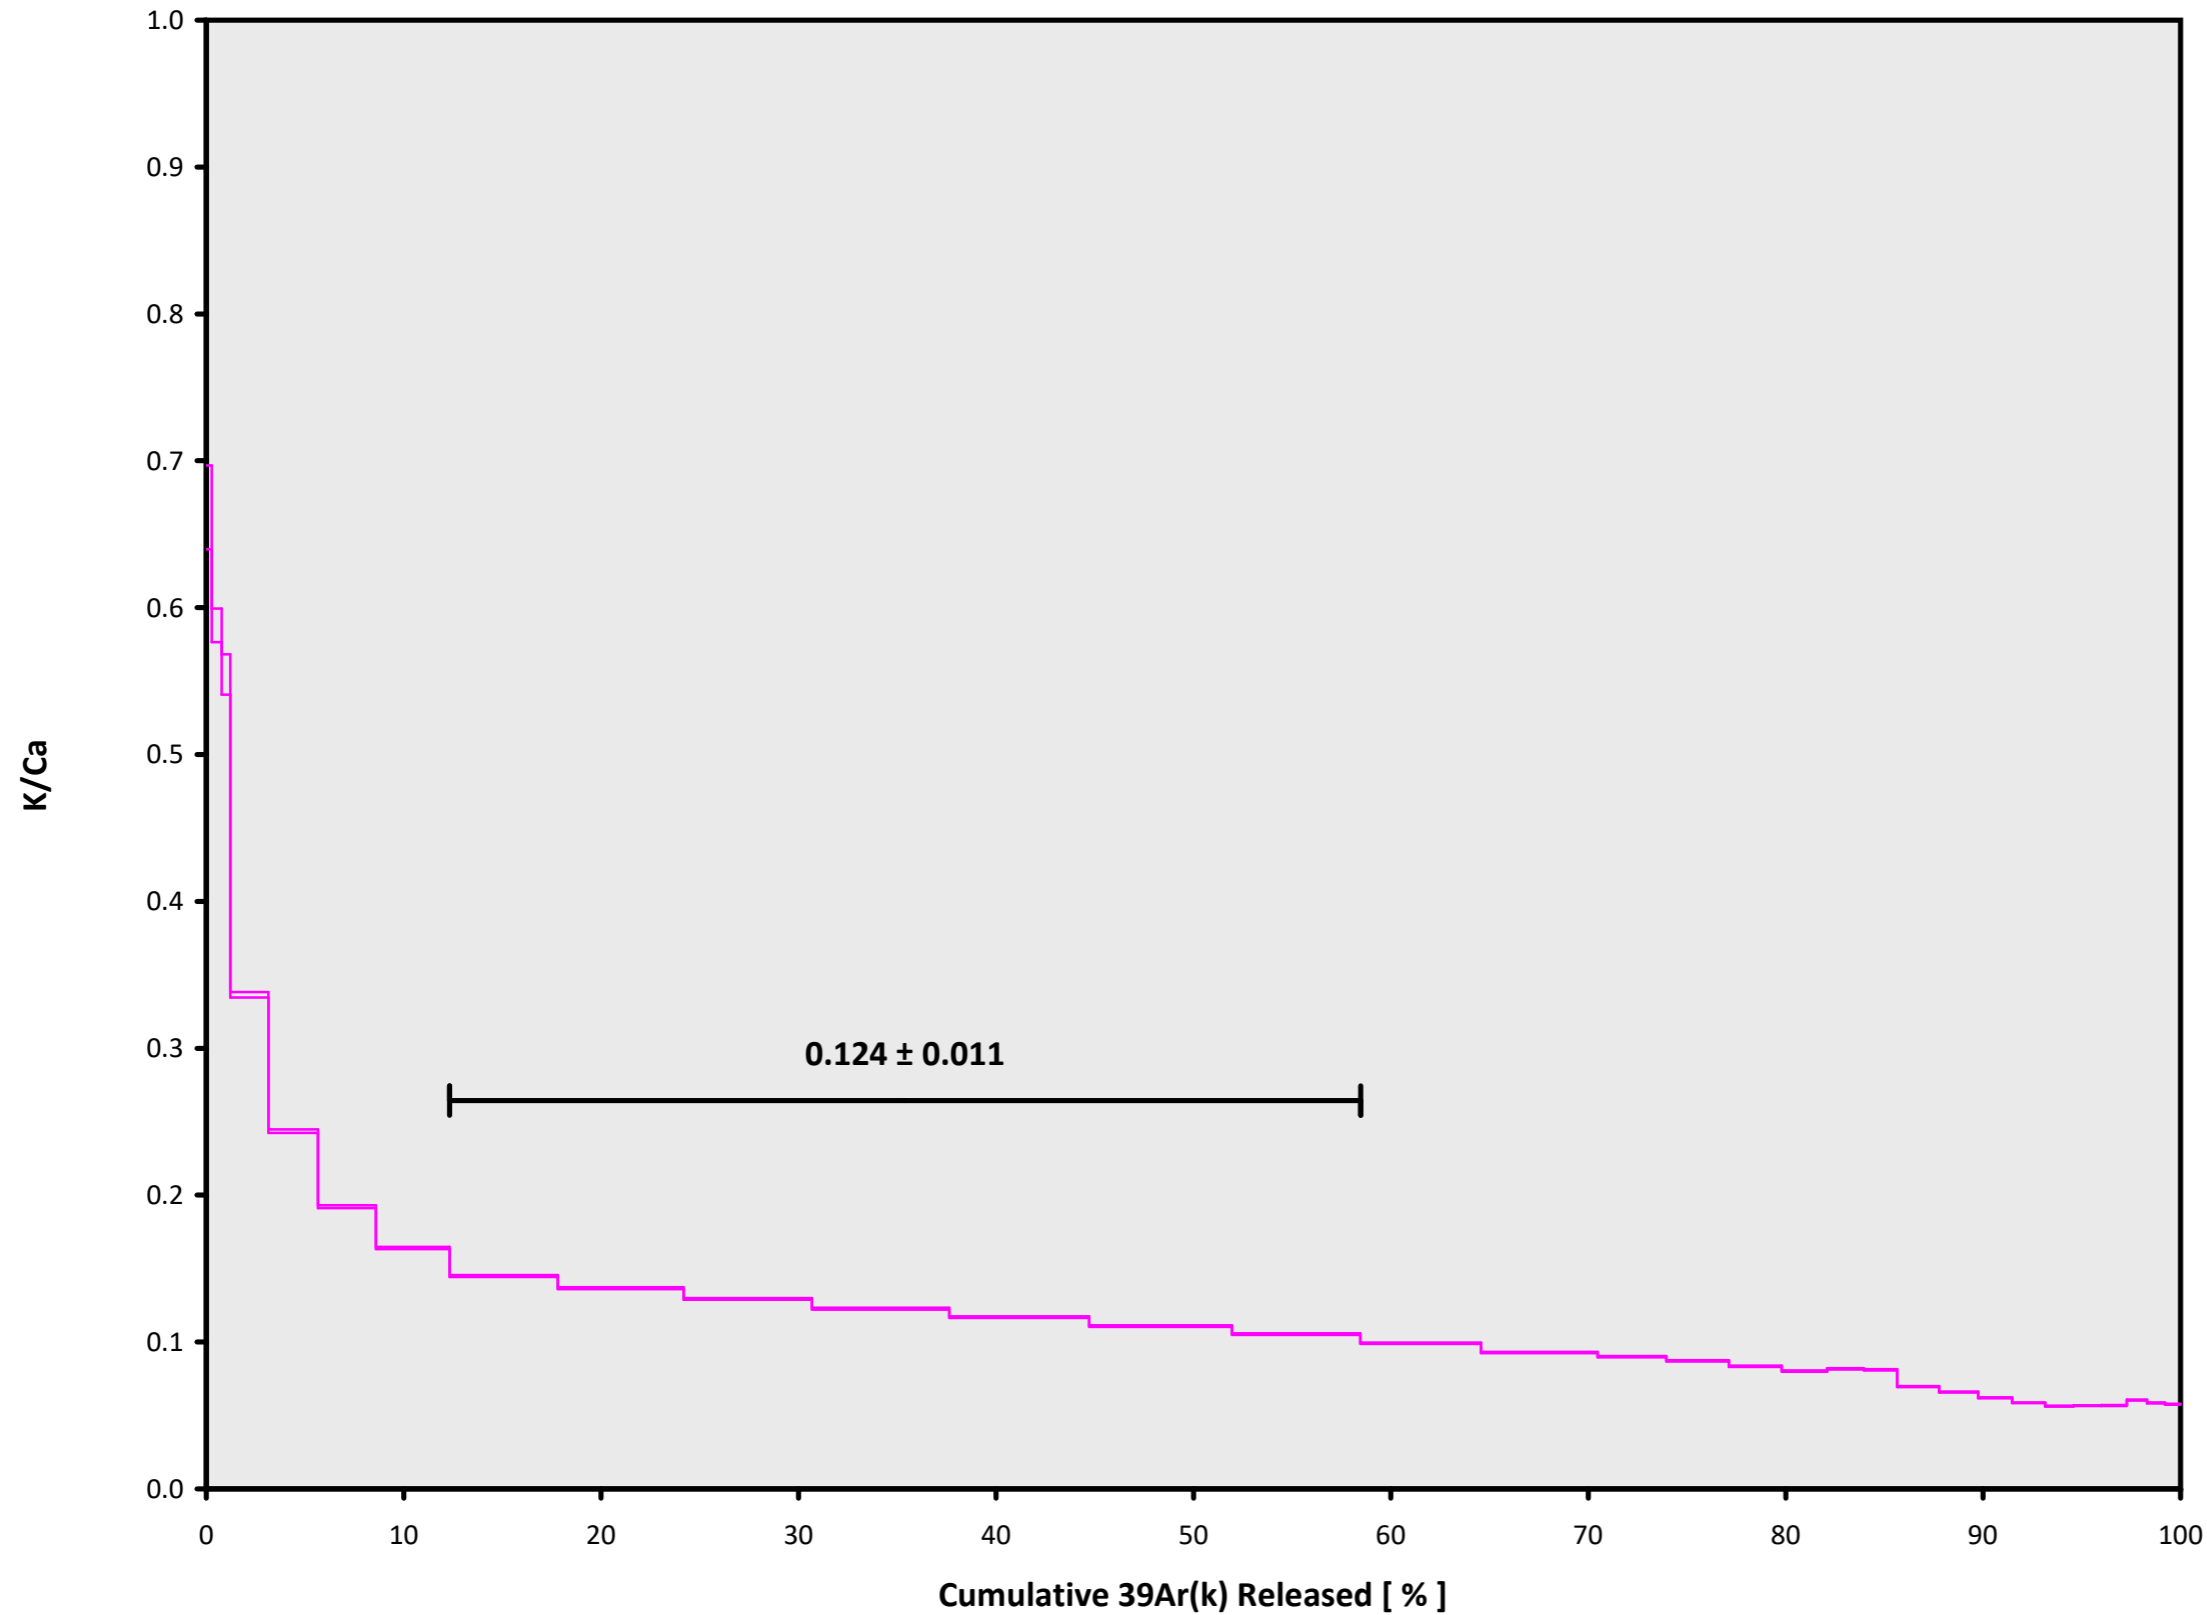

### Ar-Ages in Ma

#### WEIGHTED PLATEAU

16.84 ± 0.07

#### TOTAL FUSION

16.37 ± 0.05

#### NORMAL ISOCHRON

16.91 ± 0.11

#### INVERSE ISOCHRON

16.91 ± 0.11

#### TRAPPED $^{40}\text{Ar}/^{36}\text{Ar}$ RATIO

Standard  $^{40}/^{36} = 298.56 \pm 0.104$   
%SD

### Sample Info

#### Groundmass

Leslie Gulch

Dan Miggins

IRR = 22-OSU-05 (5D20-22)

J = 0.00163439 ± 0.00000177

23F04028.AGE >>> LMF-19-80 >>> OREGON | MASS (22-34) PROJECT

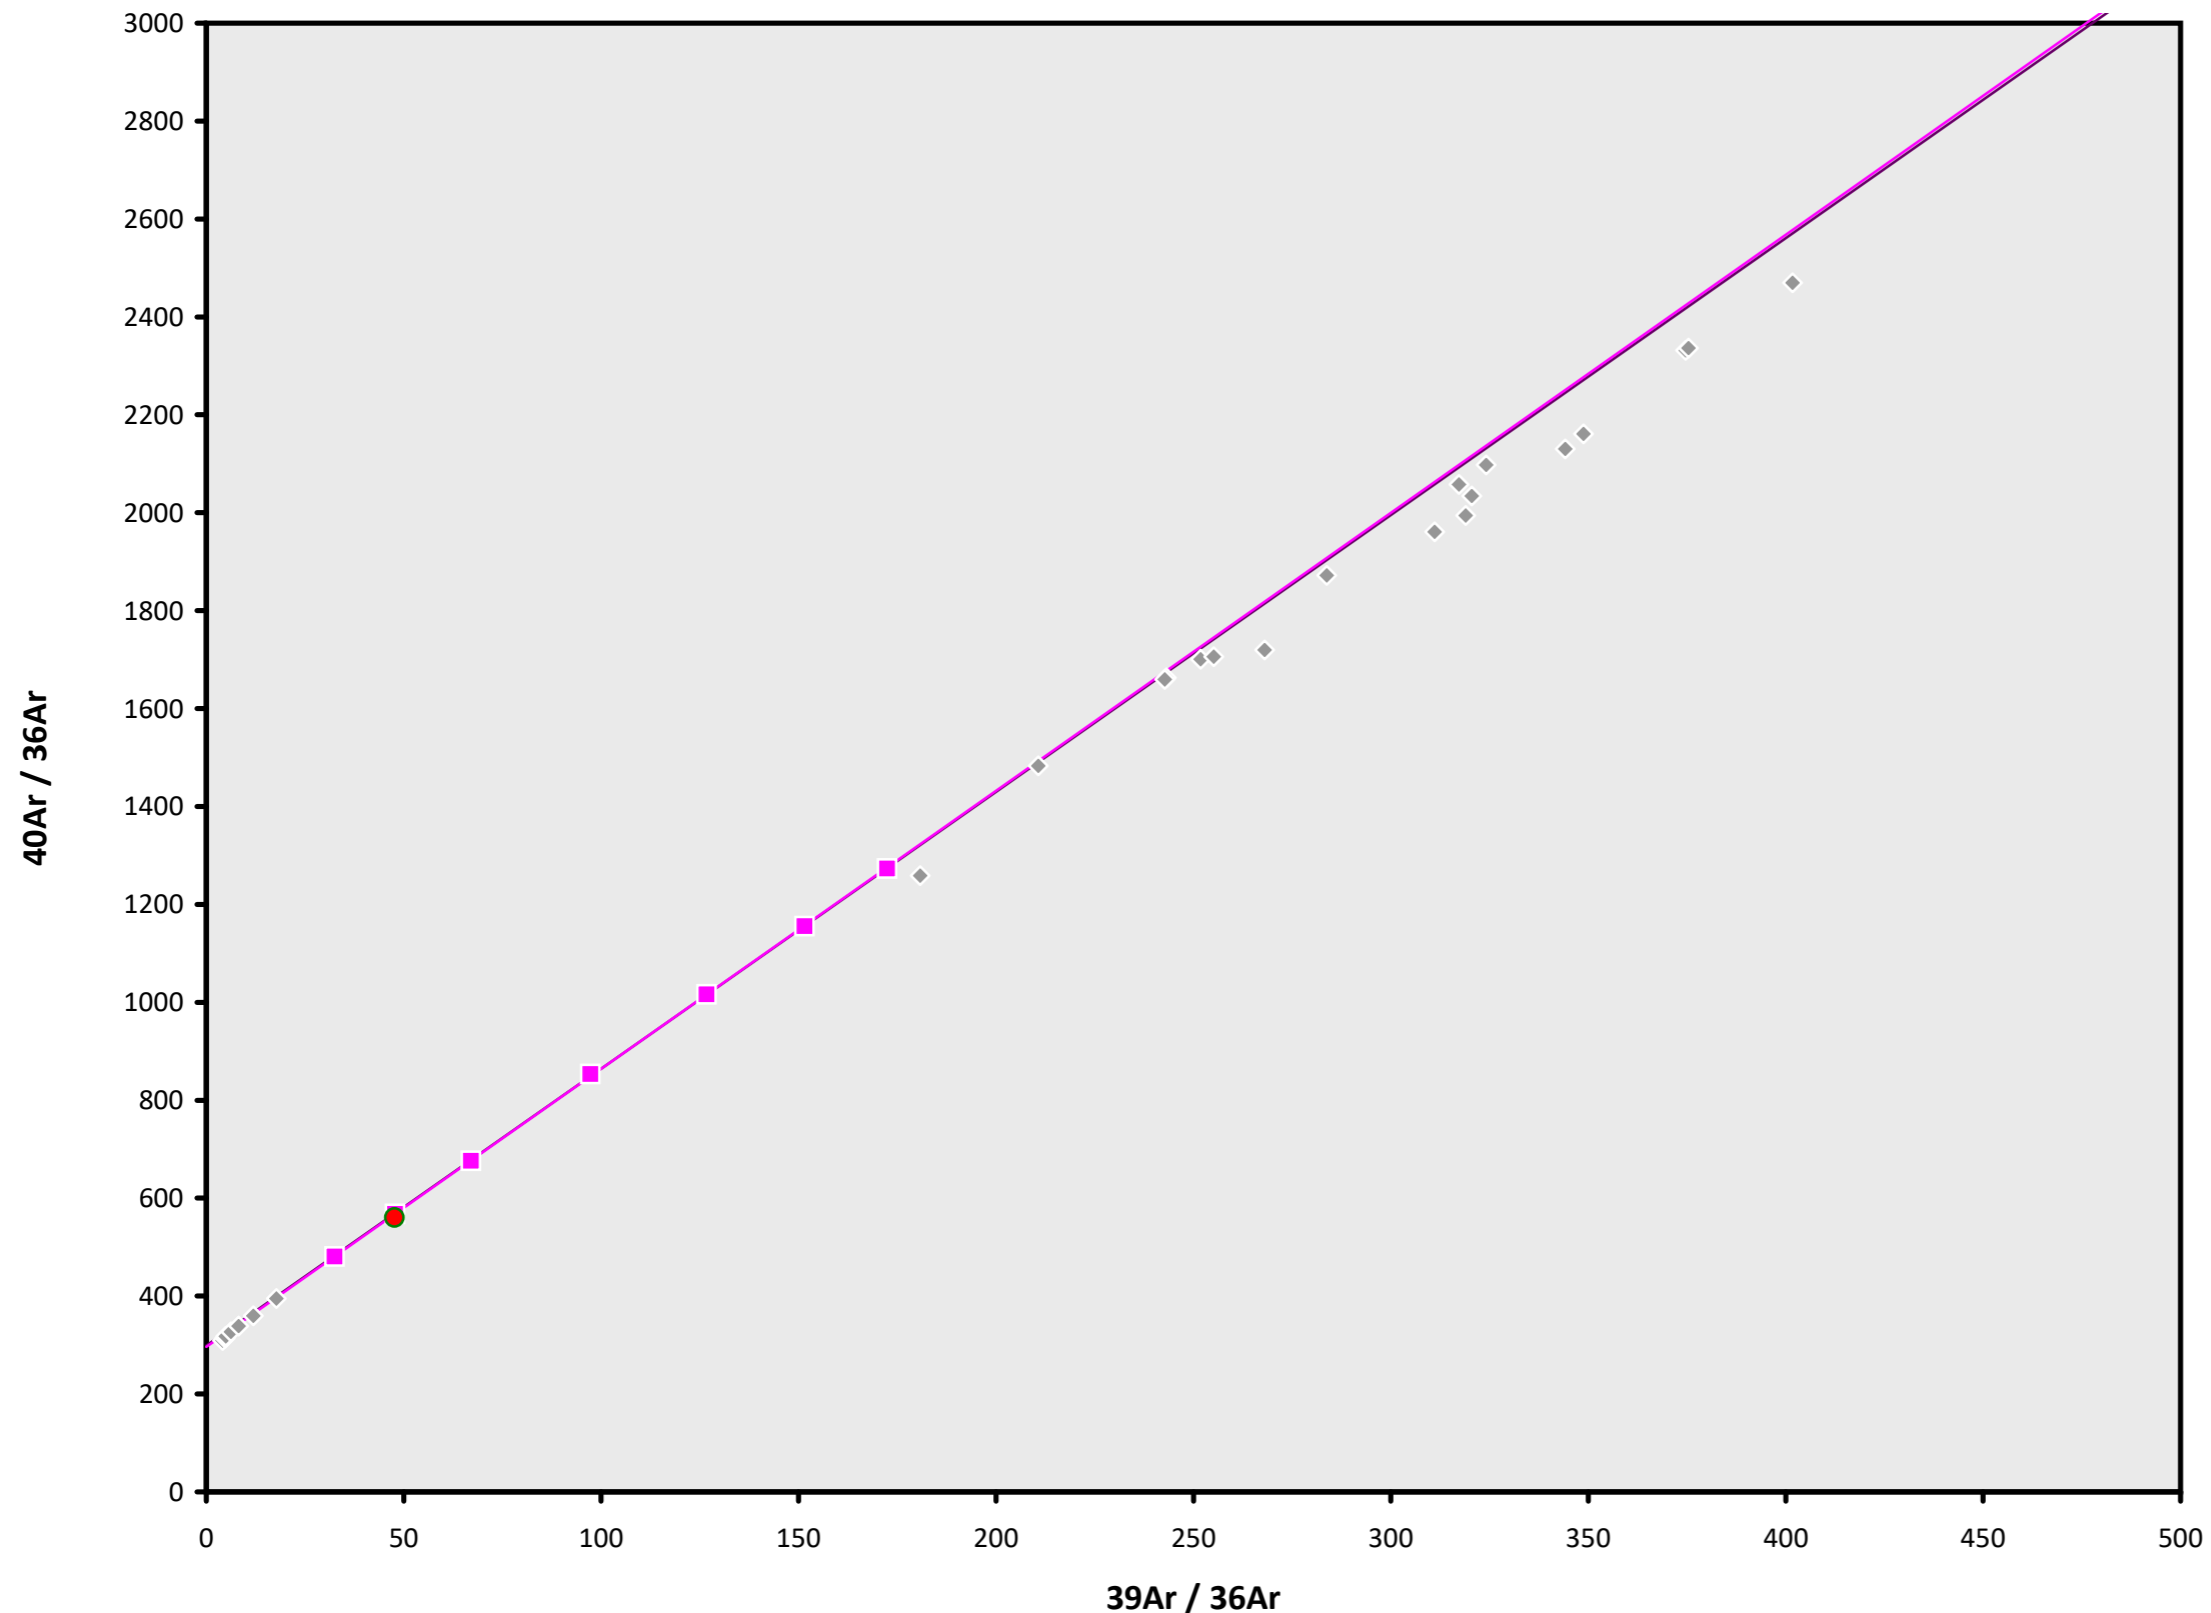

### Ar-Ages in Ma

#### WEIGHTED PLATEAU

$16.84 \pm 0.07$

#### TOTAL FUSION

$16.37 \pm 0.05$

#### NORMAL ISOCHRON

$16.91 \pm 0.11$

#### INVERSE ISOCHRON

$16.91 \pm 0.11$

#### MSWD (PROBABILITY)

3.92 (0%)

#### CALCULATED $^{40}\text{Ar}/^{36}\text{Ar}$

#### INTERCEPT

$296.2 \pm 3.0$

### Sample Info

#### Groundmass

Leslie Gulch

Dan Miggins

IRR = 22-OSU-05 (5D20-22)

$J = 0.00163439 \pm 0.00000177$

23F04028.AGE >>> LMF-19-80 >>> OREGON | MASS (22-34) PROJECT

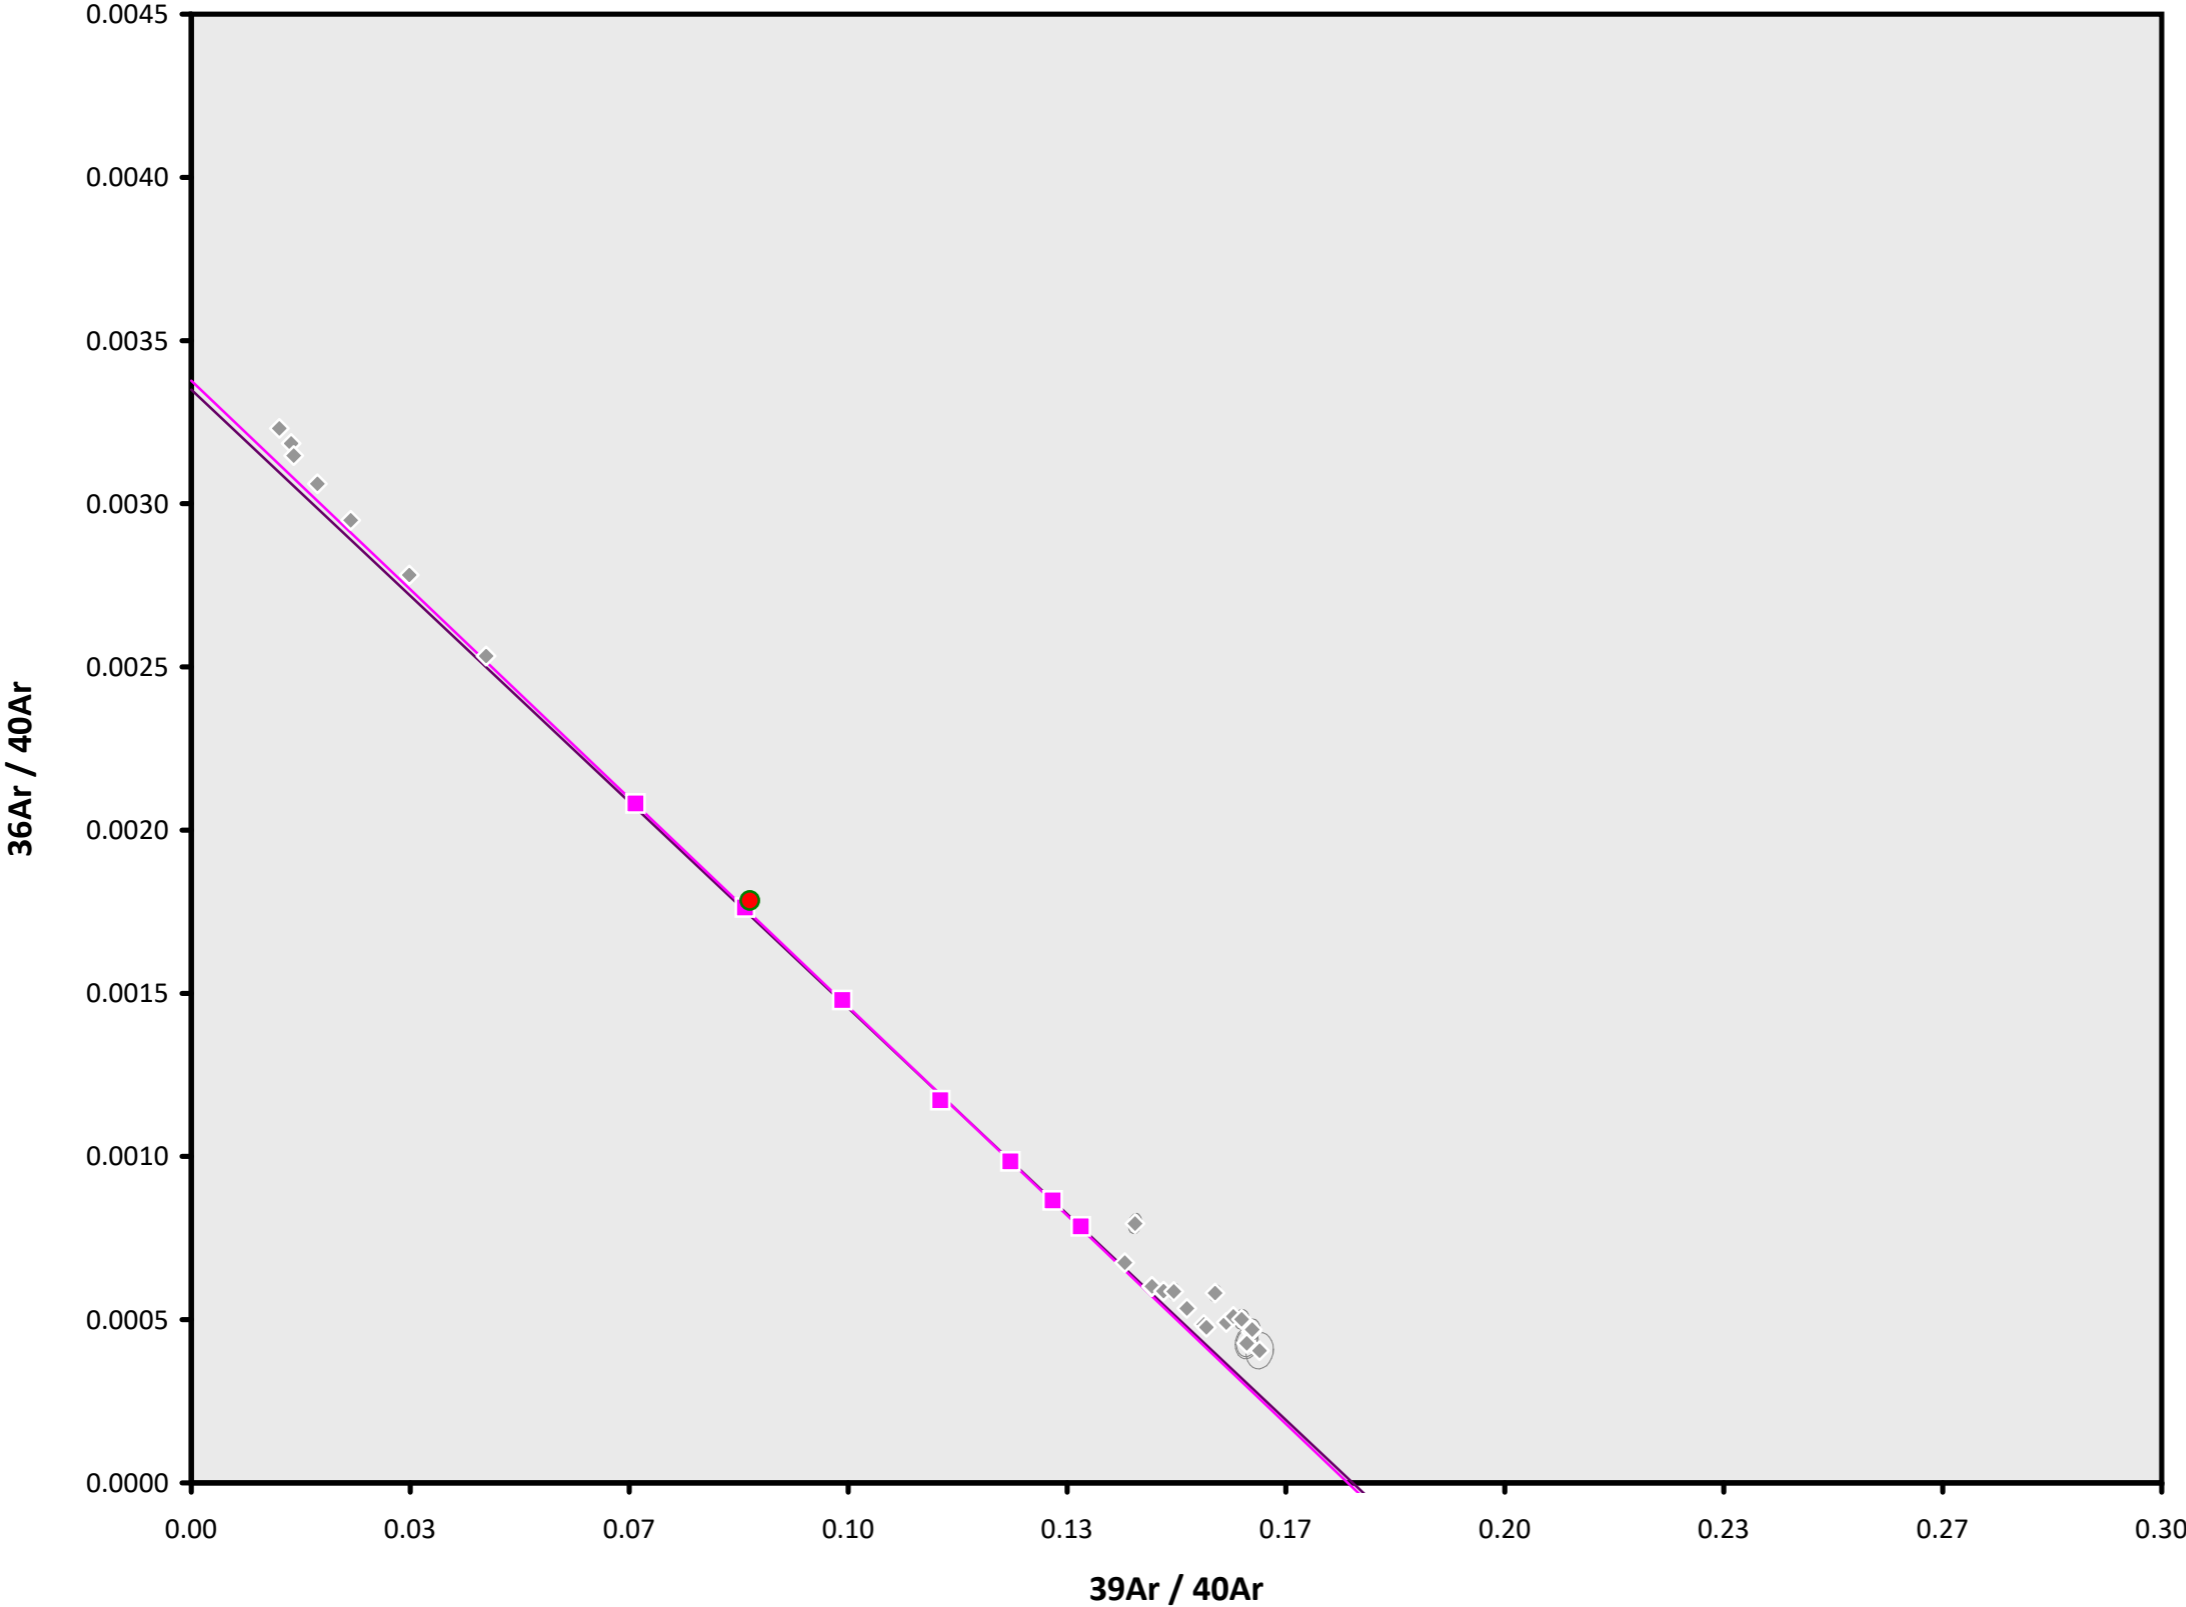

Ar-Ages in Ma

WEIGHTED PLATEAU

$16.84 \pm 0.07$

TOTAL FUSION

$16.37 \pm 0.05$

NORMAL ISOCHRON

$16.91 \pm 0.11$

INVERSE ISOCHRON

$16.91 \pm 0.11$

MSWD (PROBABILITY)

3.99 (0%)

SPREADING FACTOR

38.5%

CALCULATED  $^{40}\text{Ar}/^{36}\text{Ar}$

INTERCEPT

$296.2 \pm 3.1$

Sample Info

Groundmass

Leslie Gulch

Dan Miggins

IRR = 22-OSU-05 (5D20-22)

$J = 0.00163439 \pm 0.00000177$
